# Supplementary material for: Deformation under flow and morphological recovery of cancer cells
Source: Royal Society of Chemistry journal article supplement (doi:10.1039/d4lc00246f), 2024-01-01
Supplement: d4lc00246f2.xlsx [file d4lc00246f2.xlsx]

## Sheet: MCFs
track	arrest	a0	max strain	end strain
220517s1t1	3.86	20.6667	0.259361	0.127065
220517s2t1	0.7	16.9845	0.305437	0.0843014
220517s2t2	0.2	14.916	0.223321	-0.0420576
220517s3t1	0.58	16.4043	0.318925	0.137751
220517s3t3	1.1	15.4066	0.449819	0.0983251
220517s3t6	2.08	17.6271	0.225789	0.0725601
220518s1t3	6.52	17.2052	0.312265	0.0753972
220518s2t4	0.18	14.324	0.374925	0.0842029
220518s2t5	0.16	15.9875	0.444613	0.0204923
220524s1t1	0.26	17.1774	0.509948	0.112934
220524s1t3	0.28	16.0717	0.406072	0.0918407
220524s2t1	1.84	16.9006	0.479477	-0.0759894
220524s2t2	3.48	17.7734	0.37861	-0.0306144
220524s2t5	0.2	15.0405	0.340858
220524s3t1	0.54	14.4714	0.284474
220524s3t2	0.04	14.3523	0.139683	0.0801645
220524s3t3	0.54	16.109	0.466214	0.00280776
220524s3t4	0.56	15.7863	0.369015
220609s1t1	1.46	15.4572	0.334147	0.0751536
220609s1t3	1.7	16.4651	0.403197
220609s1t4	0.3	16.9366	0.16385
220609s1t5	2.84	15.8904	0.360525	0.0729726
220609s1t6	0.4	16.3813	0.290219
220609s2t1	0.92	17.7788	0.540642	0.162302
220609s2t2	2.02	16.6494	0.421293	0.170167
220609s2t3	1.9	17.3065	0.387302	0.0532543
220609s2t5	0.04	20.2197	0.142009	-0.0317794
220609s2t7	0.94	21.7283	0.244772
220609s2t8	0.04	18.6271	0.315285	-0.122437
220609s2t9	1.3	16.9744	0.358134	0.107249
220609s2t11	3.1	18.9893	0.31485	0.0362839
220609s2t12	0.74	15.0916	0.371541	0.11904
220609s3t1	0.16	16.0586	0.194901	-0.0402954
220609s3t2	2.28	17.3687	0.302396	0.053863
220609s3t3	4.76	16.32	0.352566
220609s3t4	17.14	17.4339	0.405629	0.0749679
220609s3t5	2.52	16.5675	0.281755	-0.00336795

## Sheet: SKs
track	arrest	a0	max strain	end strain
210526s1t4	1	16.8282	0.725586	0.249098
210526s1t6	0.1	14.5872	0.555	0.100282
210616s1t1	2.96	16.5454	0.392694	0.145864
210616s1t2	0.28	15.45	0.398479	0.0123206
210616s2t2	5.26	17.3192	0.469463	0.245755
210616s2t4	4.36	17.1786	0.567297	0.0359639
210616s2t6	0.16	16.0122	0.470948	0.0475735
210616s3t1	0.96	16.2027	0.51235	0.0143137
210616s3t2	0.54	14.823	0.240345	0.0570453
210616s3t3	16.8	16.874	0.422951	0.0992309
210616s3t4	3.14	14.8188	0.333823	0.0480635
210805s1t1	0.26	14.3563	0.471442	0.110131
210805s1t2	0.18	16.1141	0.461136	0.226456
210805s1t4	1.72	14.6912	0.471519	0.0882568
210805s1t5	0.6	17.1737	0.538904	0.158647
210805s1t6	0.02	13.9951	0.305417	0.0499227
210805s1t7	0.34	14.4247	0.369827	0.0731303
210805s1t9	0.04	12.9574	0.330817	0.0520213
210805s1t10	0.04	15.5481	0.388702	0.106303
210805s1t11	0.1	16.6065	0.561726
210805s3t1	0.04	13.0687	0.213228	-0.00119374
210805s3t2	0.16	13.4072	0.37138
210805s3t3	0.38	13.2935	0.264101	0.154728
210805s3t4	0.1	13.1113	0.250109	0.0551557
210805s3t5	3.02	16.1036	0.519131
210805s3t6	0.04	12.7252	0.206209	-0.0362284
210805s3t7	1.84	16.8617	0.540091	0.233862
210805s3t8	0.12	15.0508	0.406792	0.028428
210805s3t9	0.1	15.8579	0.484559	0.0898017
210805s3t10	0.08	15.0708	0.436794	-0.0557503
210805s3t11	0.06	14.0967	0.312785	0.0335998
210805s3t13	0.06	14.9322	0.444552
210805s3t14	0.04	13.2322	0.302311
210805s3t15	0.02	13.3839	0.342132	-0.013937
210805s3t16	0.56	17.1535	0.482479
210805s3t17	0.22	14.7403	0.407359
210805s3t18	0.16	14.4294	0.272837	-0.0106687
210805s3t19	0.02	13.6484	0.408991	0.108262
210805s3t20	0.66	14.0533	0.400907	0.103241
210805s3t22	1.08	13.5479	0.318645	0.0727469
210805s3t23	1	14.5747	0.490489
210805s3t24	0.1	13.4383	0.289221	0.041773
210805s3t25	4.94	18.0403	0.490923	0.235673
210805s3t26	0.06	14.0303	0.368994	0.107659
210805s3t28	0.14	13.996	0.308861	0.069372
210805s3t29	0.1	13.5047	0.31777	0.118704
210805s3t30	0.06	13.2763	0.304244
210805s3t32	0.1	14.7696	0.393847
210805s3t33	1.02	14.1438	0.355061	0.0431855
230504s2t1	27.58	20.8095	0.569703	0.270554
230504s2t4	0.52	18.6141	0.205151	-0.0129753
230504s2t5	0.06	16.0264	0.244115
230504s2t6	1.26	20.5799	0.416399
230504s2t7	1.26	18.9171	0.446307
230504s2t8	0.94	20.9405	0.514862
230504s2t10	0.26	19.4234	0.360392	0.0285524
230504s2t11	0.08	17.2361	0.228725
230504s2t13	0.18	17.7057	0.35525
230504s2t14	0.2	18.0896	0.307666
230504s2t15	0.16	16.9296	0.236446	-0.0159453
230504s2t16	0.02	16.3387	0.14422
230504s2t17	0.02	16.1513	0.14309
230504s2t18	0.2	18.1517	0.271512
230504s2t19	0.08	16.6227	0.333007
230504s2t20	0.06	16.9349	0.416957
230504s2t21	0.24	17.6162	0.389624	0.0853674
230504s2t22	0.54	16.9295	0.275701	0.035756
230504s2t23	0.02	15.2775	0.359514	0.00830034
230504s2t24	1.06	18.6074	0.438358	0.078775
230504s3t1	0.04	15.0694	0.339115	-0.00092655
230504s3t2	8.9	19.6609	0.495893
230504s3t3	5.98	18.0469	0.488023
230504s3t4	0.04	15.5795	0.404196
230504s3t7	0.92	16.2038	0.422736	0.0732528
230504s3t8	0.1	16.3947	0.346309	0.0807449
230504s3t9	0.06	16.3111	0.24147
230504s3t10	0.02	15.2978	0.205429
230504s3t11	0.08	15.9151	0.240695	0.00744537
230504s3t12	0.02	13.9881	0.341352
230504s3t14	1.18	17.5835	0.316027
230504s3t16	0.44	18.4247	0.458674	0.115952
230504s3t17	0.88	16.3005	0.362082	0.108279
230504s3t19	1.58	18.0496	0.280751	0.0268097

## Sheet: MDAs
track	arrest	a0	max strain	end strain
211020s1t1	3.4	22.3198	0.526964	0.285027
211020s1t4	0.3	14.8815	0.262008	-0.043034
211020s1t5	3.68	19.0609	0.539439
211020s1t6	0.04	14.638	0.407296	0.151442
211020s1t7	1.48	17.7299	0.705932
211020s1t8	27.52	27.511	0.414147
211020s1t9	0.06	16.6005	0.303976	0.00113203
211020s1t10	0.1	17.6487	0.387033	-0.0773612
211020s1t14	60.64	22.4084	0.735779	0.571344
211020s1t15	5.74	23.4946	0.751034
211020s2t1	6.08	20.4486	0.644892	0.0705472
211020s2t5	1.18	17.6865	0.385046	0.0171338
211020s2t6	0.02	17.1485	0.150007	0.0109276
211020s3t1	0.1	16.6506	0.211934	-0.0693101
211020s3t6	0.08	14.9609	0.419171	0.026112
211020s5t1	0.28	16.0727	0.589291	0.124014
211020s5t2	9.02	21.9384	0.684861
211020s5t3	2.1	20.2154	0.662793	0.287951
211020s5t4	0.02	15.7973	0.345328	-0.0094879
211020s5t5	0.06	15.5569	0.298656	0.0319928
211020s5t6	0.04	15.7004	0.251563
211020s5t8	1.44	20.7272	0.419565	0.173198
211020s5t9	0.22	16.9828	0.526611	0.053198
211021s1t1	93.76	14.4776	0.488438	0.246984
211021s1t2	38.66	16.7739	0.549441	0.213394
211021s2t2	16.96	19.6905	0.615223
211021s2t4	0.1	11.61	0.606546	0.116667
211021s3t1	3.86	18.6395	0.163553
211021s3t2	1.68	11.405	0.52241	0.252351
211021s3t4	7.82	15.0562	0.0866974	-0.122482
211021s3t5	3.84	13.1185	0.35427	0.0745022
211021s3t6	147.46	19.9912	0.633384
211021s3t8	0.04	17.0105	0.367231
211021s3t9	0.44	10.6072	0.229155	-0.144017
211021s3t10	0.02	28.5523	0.14737	-0.107168
211021s3t11	0.1	13.2116	0.388186	0.284376
211021s3t16	0.02	14.6701	0.271477
211021s3t17	0.68	15.1983	0.484966
211021s3t18	0.5	16.0775	0.552296	0.279751
211021s3t19	1.84	16.7767	0.498552	0.17442
211201s1t1	0.06	14.7635	0.268977	0.0231418
211201s1t2	2.48	16.6395	0.414405	0.059572
211201s1t3	0.1	17.0982	0.324934	0.0970376
211201s1t4	0.8	16.8784	0.422466	0.0998997
211201s1t5	0.02	22.9078	0.781792	-0.0254629
211201s1t9	0.08	16.9497	0.356075
211201s1t10	0.02	16.5763	0.397451	0.186335
211201s1t11	2.3	17.8271	0.545083	0.182593
211201s1t12	0.54	16.5725	0.477208	0.219114
211201s1t13	0.06	15.6594	0.417553
211201s1t14	0.02	15.6431	0.323196	0.0628842
211201s2t1	164.66	22.4574	0.396956
211201s2t4	1.98	15.0719	0.404026	0.0633036
211201s3t1	18.56	18.2037	0.692287	0.299694
211201s4t1	113.48	18.1526	0.199165	0.0812714
211201s4t3	0.46	19.9612	0.360744	0.0763821
211201s4t5	1.66	17.6014	0.437004
211201s4t6	1.54	16.379	0.329415
