# Supplementary material for: Deformation under flow and morphological recovery of cancer cells
Source: Royal Society of Chemistry journal article supplement (doi:10.1039/d4lc00246f), 2024-01-01
Supplement: d4lc00246f3.xlsx [file d4lc00246f3.xlsx]

## Sheet: MCFs
time	Deformation Major
	220517s1t1	220517s2t1	220517s2t2	220517s3t1	220517s3t3	220518s1t3**	220518s2t4	220518s2t5	220524s1t1	220524s1t3	220524s2t1	220524s2t2	220524s2t5	220524s3t1	220524s3t4	220609s1t1	220609s1t3	220609s1t4	220609s1t5	220609s1t6	220609s2t1	220609s2t2	220609s2t3	220609s2t7	220609s2t9	220609s2t11	220609s2t12*	220609s3t1	220609s3t2	220609s3t3	220609s3t4
0.02		0.135236		0.142197	0.257977	0.146039	0.264703		0.403731	0.306911	0.0790685	0.0542032	0.21343	0.134098	0.204345		0.156806	0.0541127	0.11716	0.155603		0.256121	0.175912	0.0312566	0.14838		0.18699	0.0868221	0.095032	0.0713327	0.0560199
0.04	0.219993	0.169494	0.176461	0.148476	0.272621	0.175467	0.301112	0.310942	0.431211	0.328848	0.114375	0.0799617	0.269897	0.143963	0.220704	0.141217	0.189861	0.102427	0.142782	0.205944	0.216015	0.291041	0.203446	0.0586213	0.189442	0.190526	0.203661	0.131774	0.109322	0.0991314	0.0909181
0.06	0.237112	0.196269	0.21322	0.175761	0.290734	0.199235	0.338782	0.361885	0.469943	0.349482	0.133227	0.0839612	0.325333	0.203023	0.240762	0.16525	0.198276	0.12187	0.149551	0.217971	0.269371	0.307426	0.247102	0.089103	0.194176	0.216392	0.235355	0.150532	0.124863	0.10372	0.0948043
0.08	0.243177	0.208826	0.233629	0.191618	0.299275	0.212548	0.367715	0.394968	0.480422	0.381693	0.172274	0.0699149	0.327737	0.183993	0.256091	0.172576	0.227693	0.142944	0.170369	0.223843	0.279163	0.316519	0.247695	0.107273	0.213927	0.235272	0.250669	0.165899	0.141019	0.150733	0.103781
0.1	0.239647	0.237059	0.273384	0.224274	0.321595	0.20822	0.382628	0.430432	0.502217	0.402677	0.168572	0.101339	0.341632	0.203297	0.263511	0.18034	0.242374	0.156982	0.190567	0.231923	0.296341	0.301705	0.19529	0.12862	0.215586	0.230887	0.243891	0.207105	0.128759	0.142556	0.103101
0.12	0.252061	0.241634	0.290924	0.232972	0.288746	0.217191	0.41763	0.480585	0.508535	0.427313	0.178306	0.0907286	0.378458	0.217532	0.284264	0.209157	0.23778	0.163611	0.191051	0.275629	0.298103	0.331894	0.25285	0.122494	0.221305	0.234034	0.239211	0.237805	0.138287	0.138475	0.116838
0.14	0.258837	0.26135	0.293053	0.222831	0.307479	0.233471	0.440757	0.509349	0.535911	0.445426	0.164731	0.122875	0.388738	0.224824	0.284367	0.215065	0.257417	0.17834	0.189477	0.264959	0.338655	0.318038	0.226119	0.1066	0.24018	0.257746	0.250309	0.267708	0.141596	0.126334	0.132728
0.16	0.262135	0.274378	0.304575	0.246461	0.35054	0.240406	0.447351	0.473365	0.565525	0.434988	0.175885	0.180699	0.408371	0.243598	0.299549	0.210809	0.263355	0.196383	0.189833	0.266498	0.323156	0.343407	0.242703	0.135054	0.236434	0.261565	0.247612		0.134861	0.138062	0.121982
0.18	0.264346	0.263771	0.323106	0.26767	0.306028	0.240721			0.584184	0.469744	0.208637	0.220073	0.424543	0.21048	0.29608	0.221544	0.27921	0.212493	0.197785	0.294687	0.339392	0.362559	0.233545	0.137234	0.246803	0.240808	0.267683		0.152946	0.143156	0.131765
0.2	0.268595	0.278743		0.271823	0.313583	0.249393			0.598083	0.469654	0.209759	0.217073	0.346985	0.245266	0.32181	0.222197	0.283426	0.222956	0.206874	0.291231	0.343403	0.321329	0.222306	0.137633	0.251596	0.246467	0.28877		0.159111	0.157643	0.152769
0.22	0.27369	0.301297		0.253063	0.36759	0.242421			0.632334	0.482661	0.224614	0.230477		0.275729	0.331826	0.248292	0.272311	0.233873	0.206343	0.302705	0.355772	0.339575	0.246652	0.141706	0.270622	0.244565	0.284816		0.159327	0.158654	0.134297
0.24	0.290497	0.292338		0.300197	0.343773	0.254797			0.670306	0.517866	0.224027	0.199323		0.262593	0.329178	0.253179	0.275638	0.24897	0.217345	0.311662	0.350916	0.367376	0.240187	0.136507	0.263781	0.248238	0.296074		0.159849	0.165792	0.12897
0.26	0.280305	0.310581		0.298448	0.321085	0.252529				0.535135	0.227056	0.218613		0.252487	0.337985	0.260615	0.301192	0.252783	0.21732	0.323011	0.361515	0.333427	0.232119	0.136482	0.266949	0.260807	0.28679		0.183084	0.150476	0.14851
0.28	0.283307	0.305758		0.296089	0.324043	0.260788				0.49984	0.237632	0.248925		0.275538	0.358617	0.262302	0.308235	0.268738	0.217479	0.3416	0.354973	0.33308	0.258152	0.17069	0.25268	0.239799	0.290422		0.180337	0.133647	0.137801
0.3	0.285711	0.306709		0.278908	0.347906	0.264405					0.222503	0.230727		0.273307	0.358994	0.266118	0.313428	0.277843	0.222767	0.336054	0.364853	0.384208	0.274043	0.16016	0.282158	0.249909	0.315063		0.188697	0.165711	0.122229
0.32	0.281816	0.326578		0.30215	0.374037	0.261699					0.247484	0.243322		0.297369	0.379116	0.245709	0.322565		0.224193	0.377611	0.388248	0.385355	0.254972	0.155126	0.290945	0.249742	0.325637		0.176734	0.151816	0.161203
0.34	0.27879	0.336528		0.307766	0.325041	0.273235					0.233065	0.229323		0.297703	0.380644	0.268437	0.314061		0.226417	0.367328	0.351733	0.368998	0.279946	0.178188	0.28183	0.268407	0.336738		0.169168	0.150833	0.154618
0.36	0.290849	0.340149		0.298712	0.341754	0.285538					0.220807	0.268907		0.306458	0.386498	0.278653	0.309785		0.228588	0.378219	0.399006	0.370012	0.245939	0.166054	0.297641	0.268788	0.325582		0.184034	0.142952	0.164869
0.38	0.291248	0.325853		0.289181	0.336224	0.289399					0.237654	0.236086		0.320864	0.365688	0.295081	0.319434		0.228746	0.389879	0.389821	0.363592	0.238096	0.185154	0.311124	0.27878	0.355476		0.185457	0.147381	0.161446
0.4	0.284276	0.338552		0.303475	0.345276	0.283662					0.252509	0.254408		0.310177	0.378531	0.280523	0.335426		0.227442		0.359004	0.375833	0.282002	0.190964	0.307959	0.274574	0.346158		0.20845	0.159404	0.182447
0.42	0.305031	0.34413		0.309591	0.346822	0.30287					0.249622	0.244712		0.315413	0.418863	0.300076	0.328801		0.225628		0.375276	0.339068	0.261598	0.192511	0.297126	0.263644	0.333985		0.196276	0.192244	0.168517
0.44	0.303109	0.361738		0.329322	0.391253	0.299394					0.263561	0.269292		0.340542	0.431376	0.278572	0.336098		0.23506		0.454019	0.366946	0.267928	0.186926	0.304494	0.254333	0.32817		0.185581	0.152374	0.177368
0.46	0.297445	0.353613		0.297201	0.356479	0.300018					0.287083	0.272265		0.337199	0.411531	0.297715	0.321512		0.233374		0.427857	0.350157	0.244034	0.194394	0.308988	0.269703	0.361806		0.203419	0.159201	0.195228
0.48	0.300106	0.380357		0.319513	0.392376	0.292336					0.252534	0.279853		0.379246	0.433414	0.29623	0.332591		0.228317		0.424439	0.357545	0.244791	0.18149	0.31296	0.255747	0.364775		0.217516	0.186805	0.17848
0.5	0.315742	0.365651		0.327068	0.385493	0.305051					0.260095	0.296314		0.359319	0.455769	0.292482	0.361793		0.232873		0.429165	0.335127	0.227084	0.204446	0.304299	0.255314	0.382116		0.184898	0.183167	0.195984
0.52	0.308038	0.377698		0.332361	0.375704	0.300711					0.254206	0.25723		0.374305	0.425128	0.267126	0.326997		0.228555		0.471275	0.323152	0.255735	0.204349	0.334084	0.256672	0.391928		0.209642	0.177572	0.189638
0.54	0.306608	0.386271		0.335912	0.408204	0.282701					0.253004	0.271519			0.442225	0.304196	0.337777		0.242343		0.466607	0.37146	0.262484	0.19976	0.315855	0.266743	0.373403		0.196171	0.179169	0.173886
0.56	0.297616	0.382528		0.360441	0.389558	0.306258					0.280153	0.304428				0.279024	0.348349		0.245213		0.44962	0.382491	0.287558	0.204185	0.328987	0.262629	0.376764		0.202791	0.176805	0.202943
0.58	0.303674	0.405171			0.377339	0.307131					0.2927	0.270868				0.313143	0.33963		0.244695		0.439893	0.351395	0.260833	0.185087	0.303178	0.282376	0.387945		0.201273	0.18468	0.187621
0.6	0.298112	0.397016			0.408796	0.317484					0.276712	0.276617				0.300267	0.372954		0.239707		0.440789	0.34551	0.258284	0.204762	0.33519	0.267734	0.387763		0.215214	0.175425	0.185157
0.62	0.295987	0.419719			0.394352	0.299431					0.269663	0.2883				0.301944	0.357713		0.243982		0.469087	0.395007	0.252373	0.229079	0.331388	0.261283	0.402818		0.207214	0.188665	0.174864
0.64	0.29917	0.403559			0.394681						0.314119	0.259876				0.282154	0.355054		0.248133		0.486262	0.361037	0.258308	0.233485	0.334644	0.265743	0.430809		0.208482	0.165234	0.172182
0.66	0.30113	0.404014			0.351205						0.31369	0.280435				0.293205	0.364454		0.253456		0.461586	0.367363	0.251701	0.235193	0.343036	0.255716	0.412446		0.207786	0.190412	0.212066
0.68	0.306229				0.404863						0.303747	0.278055				0.317004	0.379466		0.264324		0.483456	0.37896	0.282635	0.245465	0.341031	0.267777	0.410271		0.224154	0.198425	0.185197
0.7	0.298518				0.389508						0.279791	0.307338				0.305203	0.364525		0.261268		0.478253	0.353811	0.278955		0.349465	0.275665	0.4131		0.230315	0.193175	0.172576
0.72	0.304296				0.36892						0.301835	0.290259				0.304769	0.372579		0.263531		0.480296	0.353381	0.241815	0.231621	0.338147	0.269733	0.423538		0.232097	0.18921	0.19376
0.74	0.310134				0.411783						0.301896	0.31388				0.315652	0.397688		0.259329		0.523047	0.358995	0.252278	0.256436	0.362417	0.289205			0.231645	0.17968	0.169505
0.76	0.30582				0.351795						0.301341	0.296874				0.323198	0.392214		0.256197		0.519589	0.366295	0.253492	0.27774	0.3471	0.282201			0.235365	0.185074	0.194631
0.78	0.305698				0.399552						0.341388	0.282221				0.31828	0.383918		0.273479		0.502173	0.358869	0.281501	0.251036	0.360439	0.281252			0.244278	0.211562	0.177512
0.8	0.304825				0.440249						0.335643	0.276782				0.334045	0.395656		0.256605		0.52954	0.382128	0.266833	0.259894	0.36167	0.295278			0.242999	0.204792	0.184777
0.82	0.309045				0.356884						0.33844	0.285265				0.312112	0.409617		0.272647		0.550825	0.374639	0.27129	0.269985	0.374401	0.287994			0.257085	0.203865	0.178788
0.84	0.307833				0.397546						0.330784	0.295865				0.319788	0.388424		0.272371		0.547081	0.370633	0.263891	0.282018	0.355863	0.293592			0.245613	0.207726	0.181536
0.86	0.306036				0.443811						0.33632	0.298775				0.329275	0.385663		0.272495		0.5625	0.366726	0.281556	0.294079	0.376481	0.283653			0.249685	0.190822	0.18135
0.88	0.314617				0.417973						0.328996	0.317151				0.307996	0.413604		0.267457		0.577323	0.354154	0.306569	0.305553	0.388534	0.282708			0.249125	0.220012	0.180164
0.9	0.301288				0.392563						0.358735	0.290668				0.322667	0.415815		0.269227		0.597333	0.366385	0.256576	0.29268	0.365174	0.27228			0.24365	0.209726	0.193456
0.92	0.313646				0.430524						0.332766	0.280816				0.313907	0.391833		0.277036		0.574174	0.336502	0.296911	0.299378	0.379068	0.284841			0.25168	0.203311	0.202434
0.94	0.309824				0.400111						0.34023	0.30012				0.343262	0.400836		0.265365			0.38829	0.273169		0.376912	0.277765			0.273928	0.23163	0.17629
0.96	0.309372				0.443734						0.340223	0.310629				0.347128	0.41399		0.290835			0.3787	0.287937		0.373064	0.28629			0.250784	0.229217	0.164883
0.98	0.314418				0.42504						0.34505	0.275703				0.344607	0.406495		0.289035			0.398551	0.269586		0.385128	0.307016			0.251896	0.216419	0.177881
1	0.317919				0.439841						0.333947	0.307701				0.330597	0.396603		0.281744			0.351944	0.280753		0.381328	0.271459			0.25996	0.22872	0.194181
1.02	0.316292				0.467851						0.344731	0.342931				0.320347	0.427242		0.278481			0.352056	0.267423		0.405619	0.295453			0.263287	0.226255	0.177843
1.04	0.318119										0.340133	0.320649				0.327774	0.40929		0.285438			0.386582			0.40833	0.291595			0.248061	0.207247	0.172838
1.06	0.327004				0.441445						0.361368	0.313069				0.365578	0.41553		0.287473			0.361511	0.280293		0.396818	0.294154			0.272038	0.226327	0.184065
1.08	0.313406				0.464497						0.357134	0.314698				0.337285	0.42072		0.288383			0.445148	0.295028		0.389265	0.296387			0.25012	0.222721	0.189712
1.1	0.31674										0.372059	0.323664				0.341831	0.401771		0.29148			0.372514	0.327104		0.413863	0.280472			0.260772	0.217884	0.182111
1.12	0.316544										0.339372	0.307687				0.329438	0.415184		0.286143			0.350149	0.285383		0.420264	0.297955			0.245356	0.245682	0.183869
1.14	0.319176										0.366526	0.311172				0.344241	0.415223		0.297334			0.389197	0.28295		0.397822	0.290213			0.26158	0.203177	0.180814
1.16	0.310583										0.361842	0.323952				0.338726	0.391521		0.291388			0.385744	0.32178		0.404155	0.308454			0.266263	0.221793	0.174303
1.18	0.315995										0.377651	0.309414				0.358271	0.42109		0.302209			0.346218	0.302897		0.40042	0.290682			0.252448	0.224819	0.171346
1.2	0.318713										0.367384	0.336692				0.340152	0.420624		0.311529			0.371661	0.291729		0.420476	0.297782			0.2522	0.237231	0.173737
1.22	0.31934										0.371964	0.338829				0.356748	0.429505		0.291878			0.364607	0.309578		0.406318	0.299711			0.259557	0.246232	0.187188
1.24	0.322712										0.390728	0.353649				0.35418	0.4324		0.296755			0.374471	0.346595		0.417972	0.280546			0.27012	0.242018	0.195513
1.26	0.318885										0.348117	0.335812				0.345468	0.409801		0.304605			0.358807	0.319982		0.425179	0.301061			0.281298	0.235602	0.18734
1.28	0.321786										0.403835	0.353305				0.346133	0.393805		0.316977			0.377453	0.310989		0.409847	0.296015			0.28075	0.238207	0.167102
1.3	0.323838										0.384552	0.321815				0.366277	0.420024		0.306611			0.435482	0.289852			0.28579			0.282395	0.230191	0.166323
1.32	0.320807										0.381771	0.343257				0.375163	0.415274		0.297101			0.37734	0.314392			0.292139			0.279576	0.237582	0.190424
1.34	0.325693										0.396312	0.33932				0.382987	0.432816		0.31194			0.368968	0.306253			0.29351			0.261231	0.245224	0.191802
1.36	0.32026										0.388238	0.329113				0.35029	0.410793		0.303205			0.396224	0.323588			0.310466			0.27141	0.244678	0.204394
1.38	0.326754										0.396041	0.286058				0.342019	0.420333		0.322081			0.405093	0.331546			0.29399			0.259883	0.231485	0.196574
1.4	0.321311										0.428497	0.359104				0.361951	0.426119		0.305235			0.40156	0.296862			0.295679			0.273057	0.250272	0.179902
1.42	0.329592										0.393741	0.342056				0.35982	0.425232		0.312766			0.404495	0.316672			0.29671			0.254852	0.250497	0.191883
1.44	0.337212										0.411046	0.356601				0.360852	0.415373		0.321661			0.376229	0.330682			0.317459			0.27447	0.251846	0.195231
1.46	0.333333										0.375194	0.33372					0.422136		0.301192			0.37656	0.336464			0.314733			0.285706	0.248135	0.201485
1.48	0.33117										0.391364	0.358442					0.413367		0.319876				0.322666			0.302991			0.278417	0.232592	0.171065
1.5	0.329903										0.421719	0.341458					0.444447		0.314901			0.416775	0.347069			0.302856			0.29018	0.25185	0.183923
1.52	0.326086										0.401597	0.358261					0.437864		0.325575			0.37403				0.296809			0.28515	0.249655	0.198149
1.54	0.323998										0.399882	0.366826					0.432231		0.315635			0.36059	0.345061			0.286695			0.268268	0.232486	0.186293
1.56	0.337217										0.420459	0.345937					0.449604		0.316686			0.462718	0.344235			0.312997			0.292202	0.257144	0.200873
1.58	0.328069										0.422976	0.350159					0.443267		0.316108			0.421231	0.312407			0.296897			0.276794	0.243258	0.188491
1.6	0.327208										0.41765	0.364685					0.43857		0.330349			0.434889	0.341322			0.329816			0.27191	0.233786	0.194426
1.62	0.333449										0.419619	0.292757					0.441462		0.321373				0.323209			0.331247			0.271317	0.246417	0.194671
1.64	0.325479										0.411249	0.3165					0.449363		0.336053			0.38947	0.361724			0.322676			0.298261	0.281543	0.200732
1.66	0.336267										0.430747	0.335828					0.446107		0.327867			0.415885	0.382764			0.322074			0.281989	0.268727	0.197735
1.68	0.344332										0.410549	0.3448					0.456122		0.324445			0.378687	0.351166			0.313134			0.288086	0.267581	0.18447
1.7	0.348791										0.41673	0.33583							0.32208			0.403111	0.353673			0.31438			0.274754	0.269848	0.189242
1.72	0.34566										0.412281	0.3429							0.333011			0.469825	0.373097			0.311311			0.278729	0.257098	0.172288
1.74	0.347323										0.441845	0.324691							0.330202			0.376655	0.387043			0.335559			0.300253	0.270341	0.182389
1.76	0.342982										0.475441	0.338691							0.324699			0.446905	0.361459			0.322278			0.303107	0.281764	0.185467
1.78	0.343339										0.442692	0.353077							0.322783			0.384168	0.403113			0.320003			0.288175	0.277238	0.186757
1.8	0.343484										0.502248	0.393057							0.337983			0.422363	0.401587			0.303599			0.283976	0.262607	0.193052
1.82	0.348569										0.466468	0.289752							0.327791			0.395301				0.322561			0.284479	0.275669	0.195906
1.84	0.342782											0.33148							0.337256			0.398794	0.401306			0.306262			0.301002	0.253036	0.174883
1.86	0.343633											0.366417							0.335159			0.395973				0.325292			0.320671	0.27304	0.171361
1.88	0.355347											0.367726							0.322503			0.387068	0.425493			0.3303			0.302428	0.280277	0.209478
1.9	0.358619											0.338046							0.335493							0.341266			0.303768	0.253629	0.189151
1.92	0.36019											0.334578							0.345286			0.387899				0.312214			0.307436	0.251725	0.191907
1.94	0.359859											0.343486							0.347273			0.410658				0.327526			0.312028	0.283167	0.187754
1.96	0.360167											0.370331							0.329503							0.333666			0.311778	0.270916	0.188741
1.98	0.362013											0.359406							0.362499			0.389335				0.330053			0.306991	0.275705	0.207341
2	0.352982											0.363522							0.347721			0.345977				0.310905			0.309457	0.251778	0.194147
2.02	0.352313											0.354948							0.342995			0.264263				0.339302			0.301447	0.265823	0.19161
2.04	0.36046											0.31126							0.343601							0.319567			0.315576	0.267459	0.190174
2.06	0.364335											0.353533							0.352884							0.350628			0.306172	0.26317	0.20278
2.08	0.360553											0.359604							0.347834							0.312384			0.311176	0.266953	0.228745
2.1	0.359152											0.378479							0.350382							0.338691			0.312203	0.259167	0.220507
2.12	0.358251											0.363984							0.356503							0.335073			0.323008	0.272988	0.208801
2.14	0.35679											0.365966							0.378171							0.317944			0.347613	0.28042	0.197654
2.16	0.36258											0.357863							0.361007							0.33859			0.334343	0.262505	0.215519
2.18	0.352154											0.361018							0.341403							0.335621			0.324624	0.28219	0.215435
2.2	0.35394											0.380334							0.378059							0.313566			0.327384	0.273177	0.218335
2.22	0.350158											0.362667							0.360596							0.331782			0.331639	0.280031	0.215385
2.24	0.359019											0.362916							0.358641							0.331038			0.341403	0.259002	0.202941
2.26	0.358805											0.358909							0.364787							0.336372			0.32742	0.283427	0.195424
2.28	0.363024											0.366232							0.375086							0.317742				0.265128	0.194709
2.3	0.36582											0.366718							0.367456							0.344368				0.272648	0.223603
2.32	0.361387											0.356423							0.369993							0.349136				0.277043	0.211865
2.34	0.36489											0.374696							0.360276							0.319727				0.274454	0.210786
2.36	0.366778											0.321837							0.372833							0.318124				0.284359	0.208597
2.38	0.365798											0.360991							0.400842							0.338766				0.299804	0.213832
2.4	0.356596											0.359924							0.401994							0.340999				0.287485	0.20148
2.42	0.361063											0.350718							0.391583							0.343723				0.28412	0.201877
2.44	0.356215											0.360253							0.394645							0.34642				0.2785	0.190241
2.46	0.36715											0.38394							0.385088							0.337298				0.268033	0.226677
2.48	0.377696											0.338582							0.394411							0.34039				0.27676	0.196992
2.5	0.372392											0.38968							0.401097							0.332452				0.262138	0.225234
2.52	0.36652											0.354762							0.390331							0.352943				0.259383	0.208851
2.54	0.372677											0.40226							0.381291							0.340765				0.28643	0.20174
2.56	0.383504											0.383683							0.381398							0.346377				0.293074	0.203858
2.58	0.368544											0.367535							0.394939							0.347005				0.301343	0.207569
2.6	0.371661											0.357157							0.39434							0.358434				0.28402	0.19364
2.62	0.382012											0.383096							0.398088							0.352481				0.315529	0.192283
2.64	0.380037											0.366003							0.385019							0.351268				0.292672	0.22375
2.66	0.375203											0.401064							0.39961							0.361895				0.283499	0.211248
2.68	0.378521											0.406509							0.395318							0.371306				0.31129	0.221635
2.7	0.387949											0.391212							0.396123							0.379087				0.298189	0.210431
2.72	0.384693											0.413776							0.411812							0.364127				0.269922	0.23193
2.74	0.38668											0.35612							0.407504							0.372697				0.278721	0.199884
2.76	0.379752											0.366359							0.417343							0.358267				0.273028	0.224985
2.78	0.383588											0.375833							0.41677							0.347028				0.299863	0.218153
2.8	0.388396											0.386204							0.430233							0.344191				0.284614	0.194163
2.82	0.38524											0.398271														0.368763				0.292009	0.217951
2.84	0.385989											0.385559														0.356657				0.282742	0.211947
2.86	0.382305											0.386788														0.3578				0.278846	0.201424
2.88	0.391294											0.408578														0.35842				0.262149	0.2341
2.9	0.394027											0.398686														0.350954				0.288223	0.214114
2.92	0.391775											0.394041														0.342916				0.300906	0.200223
2.94	0.389325											0.402605														0.37335				0.281018	0.216064
2.96	0.390018											0.398375														0.373153				0.287112	0.213832
2.98	0.395999											0.39772														0.372252				0.293647	0.219919
3	0.393176											0.368459														0.364854				0.303409	0.202567
3.02	0.38275											0.374515														0.37195				0.272654	0.215115
3.04	0.383382											0.391008														0.3558				0.288132	0.211364
3.06	0.395693											0.373453																		0.298482	0.210641
3.08	0.39644											0.390741																		0.253655	0.209896
3.1	0.394223											0.368431																		0.318438	0.206111
3.12	0.39494											0.393778																		0.296475	0.215569
3.14	0.394599											0.362455																		0.318013	0.235035
3.16	0.403836											0.355468																		0.3083	0.211607
3.18	0.40031											0.381364																		0.298014	0.224771
3.2	0.397178											0.362846																		0.279347	0.214508
3.22	0.395973											0.382471																		0.312936	0.230689
3.24	0.408325											0.38935																		0.303976	0.22264
3.26	0.401227											0.387539																		0.282081	0.193466
3.28	0.411636											0.375312																		0.296765	0.224196
3.3	0.402879											0.384753																		0.312065	0.221712
3.32	0.403368											0.375184																		0.29818	0.197821
3.34	0.401006											0.371103																		0.315394	0.213554
3.36	0.406653											0.378773																		0.298007	0.229456
3.38	0.405686											0.420904																		0.312634	0.207675
3.4	0.407349											0.380631																		0.318712	0.227241
3.42	0.402661											0.355185																		0.277328	0.20255
3.44	0.406822											0.382627																		0.30008	0.208215
3.46	0.412191											0.376062																		0.314039	0.22585
3.48	0.408735																													0.309706	0.220597
3.5	0.412784																													0.314322	0.226145
3.52	0.415893																													0.327384	0.205885
3.54	0.409644																													0.304404	0.202231
3.56	0.414027																													0.317744	0.207051
3.58	0.412096																													0.328169	0.228596
3.6	0.417102																													0.311691	0.231373
3.62	0.416313																													0.334035	0.215254
3.64	0.418067																													0.336372	0.224282
3.66	0.426607																													0.330242	0.215853
3.68	0.427088																													0.326373	0.203632
3.7	0.420823																													0.335686	0.20923
3.72	0.429518																													0.325891	0.226342
3.74																														0.342775	0.223103
3.76	0.417465																													0.336418	0.205203
3.78	0.428722																													0.318446	0.222087
3.8	0.418462																													0.326224	0.217618
3.82	0.407951																													0.327358	0.200294
3.84	0.372177																													0.323397	0.244319
3.86																														0.332339	0.236722
3.88																														0.332986	0.207975
3.9																														0.333805	0.216621
3.92																														0.336691	0.235793
3.94																														0.335897	0.220466
3.96																														0.3231	0.223128
3.98																														0.322925	0.210356
4																														0.327556	0.214232
4.02																														0.344097	0.259043
4.04																														0.345092	0.229734
4.06																														0.319468	0.26027
4.08																														0.342975	0.201392
4.1																														0.312244	0.232318
4.12																														0.343465	0.199009
4.14																														0.346128	0.216696
4.16																														0.332737	0.216073
4.18																														0.335931	0.218444
4.2																														0.375275	0.260054
4.22																														0.356869	0.222025
4.24																														0.334778	0.224342
4.26																														0.352298	0.236962
4.28																														0.35484	0.223286
4.3																														0.364982	0.238401
4.32																														0.35536	0.217602
4.34																														0.364156	0.200386
4.36																														0.352882	0.209433
4.38																														0.347096	0.218615
4.4																														0.374128	0.220416
4.42																														0.351086	0.211483
4.44																														0.355057	0.228596
4.46																														0.337548	0.238606
4.48																														0.38879	0.227273
4.5																														0.353574	0.239878
4.52																														0.348763	0.227772
4.54																														0.383399	0.217703
4.56																														0.376892	0.21052
4.58																														0.379445	0.229096
4.6																														0.367537	0.209677
4.62																														0.379232	0.224256
4.64																														0.406509	0.230887
4.66																														0.359022	0.222797
4.68																														0.374783	0.218044
4.7																															0.214869
4.72																														0.37422	0.248523
4.74																														0.414041	0.2188
4.76																														0.372186	0.211141
4.78																															0.226057
4.8																															0.202889
4.82																															0.22166
4.84																															0.227676
4.86																															0.224598
4.88																															0.221357
4.9																															0.218103
4.92																															0.217152
4.94																															0.216345
4.96																															0.256495
4.98																															0.218977
5																															0.201822
5.02																															0.232829
5.04																															0.227806
5.06																															0.239883
5.08																															0.217063
5.1																															0.211134
5.12																															0.21728
5.14																															0.240533
5.16																															0.219039
5.18																															0.232315
5.2																															0.231706
5.22																															0.227456
5.24																															0.218883
5.26																															0.224028
5.28																															0.247752
5.3																															0.216906
5.32																															0.245413
5.34																															0.238155
5.36																															0.24823
5.38																															0.228822
5.4																															0.24463
5.42																															0.234742
5.44																															0.240086
5.46																															0.245693
5.48																															0.22391
5.5																															0.243554
5.52																															0.212363
5.54																															0.235678
5.56																															0.23187
5.58																															0.239504
5.6																															0.25783
5.62																															0.231689
5.64																															0.212533
5.66																															0.228662
5.68																															0.229491
5.7																															0.236705
5.72																															0.226357
5.74																															0.23395
5.76																															0.239679
5.78																															0.238623
5.8																															0.240503
5.82																															0.251379
5.84																															0.224946
5.86																															0.218098
5.88																															0.24074
5.9																															0.253582
5.92																															0.214209
5.94																															0.228482
5.96																															0.233122
5.98																															0.22725
6																															0.225367
6.02																															0.240129
6.04																															0.205025
6.06																															0.20287
6.08																															0.238056
6.1																															0.227527
6.12																															0.227643
6.14																															0.237048
6.16																															0.263312
6.18																															0.241336
6.2																															0.2441
6.22																															0.239678
6.24																															0.24848
6.26																															0.282757
6.28																															0.248407
6.3																															0.229713
6.32																															0.251267
6.34																															0.230486
6.36																															0.222566
6.38																															0.242533
6.4																															0.244463
6.42																															0.215458
6.44																															0.226113
6.46																															0.243866
6.48																															0.222114
6.5																															0.230354
6.52																															0.273684
6.54																															0.25665
6.56																															0.233802
6.58																															0.270928
6.6																															0.249956
6.62																															0.222571
6.64																															0.224055
6.66																															0.242438
6.68																															0.236541
6.7																															0.223146
6.72																															0.240277
6.74																															0.236114
6.76																															0.22924
6.78																															0.241447
6.8																															0.215198
6.82																															0.229512
6.84																															0.228572
6.86																															0.24694
6.88																															0.223752
6.9																															0.247015
6.92																															0.231764
6.94																															0.259614
6.96																															0.22325
6.98																															0.2386
7																															0.253257
7.02																															0.251059
7.04																															0.240668
7.06																															0.237724
7.08																															0.245065
7.1																															0.238717
7.12																															0.241858
7.14																															0.241675
7.16																															0.219552
7.18																															0.219335
7.2																															0.250348
7.22																															0.226095
7.24																															0.246788
7.26																															0.235932
7.28																															0.226109
7.3																															0.256275
7.32																															0.252082
7.34																															0.240768
7.36																															0.248689
7.38																															0.231571
7.4																															0.239049
7.42																															0.239398
7.44																															0.224251
7.46																															0.229483
7.48																															0.256097
7.5																															0.246949
7.52																															0.233152
7.54																															0.222957
7.56																															0.232908
7.58																															0.23577
7.6																															0.238187
7.62																															0.275057
7.64																															0.241387
7.66																															0.259324
7.68																															0.250028
7.7																															0.254082
7.72																															0.23461
7.74																															0.240152
7.76																															0.228593
7.78																															0.261831
7.8																															0.267674
7.82																															0.23403
7.84																															0.236016
7.86																															0.252382
7.88																															0.231793
7.9																															0.27974
7.92																															0.219698
7.94																															0.243578
7.96																															0.243192
7.98																															0.230173
8																															0.241116
8.02																															0.285138
8.04																															0.255295
8.06																															0.247639
8.08																															0.218698
8.1																															0.242561
8.12																															0.241412
8.14																															0.24576
8.16																															0.259904
8.18																															0.257453
8.2																															0.242895
8.22																															0.214564
8.24																															0.227616
8.26																															0.232919
8.28																															0.241699
8.3																															0.261553
8.32																															0.219081
8.34																															0.268624
8.36																															0.24713
8.38																															0.216023
8.4																															0.224214
8.42																															0.254997
8.44																															0.257979
8.46																															0.251615
8.48																															0.238361
8.5																															0.275831
8.52																															0.242029
8.54																															0.249135
8.56																															0.259365
8.58																															0.215604
8.6																															0.248353
8.62																															0.243624
8.64																															0.257063
8.66																															0.249114
8.68																															0.237736
8.7																															0.266419
8.72																															0.242555
8.74																															0.259663
8.76																															0.249081
8.78																															0.260911
8.8																															0.2618
8.82																															0.244029
8.84																															0.257373
8.86																															0.260472
8.88																															0.271804
8.9																															0.26427
8.92																															0.266651
8.94																															0.249691
8.96																															0.257263
8.98																															0.28669
9																															0.277841
9.02																															0.266377
9.04																															0.238466
9.06																															0.249472
9.08																															0.273561
9.1																															0.260653
9.12																															0.261838
9.14																															0.253987
9.16																															0.256743
9.18																															0.263363
9.2																															0.273079
9.22																															0.270882
9.24																															0.244813
9.26																															0.286851
9.28																															0.263466
9.3																															0.271419
9.32																															0.281119
9.34																															0.251863
9.36																															0.266119
9.38																															0.271449
9.4																															0.253319
9.42																															0.293426
9.44																															0.268565
9.46																															0.235384
9.48																															0.25726
9.5																															0.255615
9.52																															0.264762
9.54																															0.261754
9.56																															0.296722
9.58																															0.257325
9.6																															0.257256
9.62																															0.268314
9.64																															0.263265
9.66																															0.274538
9.68																															0.265344
9.7																															0.269459
9.72																															0.245507
9.74																															0.297234
9.76																															0.241737
9.78																															0.258559
9.8																															0.27124
9.82																															0.2673
9.84																															0.291731
9.86																															0.246714
9.88																															0.248891
9.9																															0.28179
9.92																															0.275433
9.94																															0.280568
9.96																															0.274182
9.98																															0.276476
10																															0.276785
10.02																															0.274313
10.04																															0.274155
10.06																															0.287835
10.08																															0.264546
10.1																															0.260987
10.12																															0.26031
10.14																															0.28694
10.16																															0.285673
10.18																															0.29196
10.2																															0.266445
10.22																															0.259883
10.24																															0.257922
10.26																															0.251912
10.28																															0.265532
10.3																															0.265752
10.32																															0.272606
10.34																															0.272175
10.36																															0.2706
10.38																															0.270826
10.4																															0.291549
10.42																															0.252252
10.44																															0.274173
10.46																															0.267914
10.48																															0.275222
10.5																															0.275747
10.52																															0.268085
10.54																															0.265987
10.56																															0.264495
10.58																															0.272582
10.6																															0.267944
10.62																															0.257262
10.64																															0.275254
10.66																															0.3029
10.68																															0.268344
10.7																															0.284654
10.72																															0.295901
10.74																															0.294192
10.76																															0.302097
10.78																															0.278686
10.8																															0.261386
10.82																															0.257651
10.84																															0.296818
10.86																															0.268199
10.88																															0.306187
10.9																															0.314446
10.92																															0.299889
10.94																															0.273344
10.96																															0.322603
10.98																															0.315923
11																															0.273174
11.02																															0.300643
11.04																															0.323309
11.06																															0.293088
11.08																															0.295933
11.1																															0.282691
11.12																															0.287206
11.14																															0.29862
11.16																															0.31677
11.18																															0.290674
11.2																															0.258124
11.22																															0.284395
11.24																															0.317218
11.26																															0.317286
11.28																															0.2859
11.3																															0.28666
11.32																															0.297043
11.34																															0.290687
11.36																															0.294053
11.38																															0.287385
11.4																															0.29814
11.42																															0.327431
11.44																															0.277275
11.46																															0.336395
11.48																															0.300374
11.5																															0.295255
11.52																															0.293785
11.54																															0.294768
11.56																															0.28331
11.58																															0.286816
11.6																															0.319505
11.62																															0.284153
11.64																															0.285866
11.66																															0.284733
11.68																															0.303153
11.7																															0.28904
11.72																															0.285322
11.74																															0.297452
11.76																															0.287893
11.78																															0.356704
11.8																															0.27471
11.82																															0.333913
11.84																															0.282144
11.86																															0.307355
11.88																															0.293586
11.9																															0.332028
11.92																															0.305701
11.94																															0.309681
11.96																															0.291989
11.98																															0.326435
12																															0.302788
12.02																															0.280844
12.04																															0.284427
12.06																															0.267257
12.08																															0.319416
12.1																															0.292122
12.12																															0.31739
12.14																															0.334251
12.16																															0.34631
12.18																															0.283967
12.2																															0.334758
12.22																															0.313455
12.24																															0.328933
12.26																															0.297949
12.28																															0.305735
12.3																															0.292946
12.32																															0.304076
12.34																															0.289364
12.36																															0.329777
12.38																															0.323353
12.4																															0.290638
12.42																															0.290597
12.44																															0.311244
12.46																															0.336561
12.48																															0.31037
12.5																															0.298979
12.52																															0.304315
12.54																															0.306948
12.56																															0.295849
12.58																															0.297853
12.6																															0.306625
12.62																															0.293963
12.64																															0.310527
12.66																															0.287111
12.68																															0.319209
12.7																															0.352061
12.72																															0.320393
12.74																															0.299607
12.76																															0.28821
12.78																															0.3066
12.8																															0.347973
12.82																															0.292861
12.84																															0.343431
12.86																															0.306015
12.88																															0.325823
12.9																															0.339383
12.92																															0.285359
12.94																															0.320195
12.96																															0.312618
12.98																															0.303944
13																															0.286052
13.02																															0.289289
13.04																															0.316165
13.06																															0.299137
13.08																															0.327239
13.1																															0.307106
13.12																															0.31524
13.14																															0.32939
13.16																															0.310407
13.18																															0.269848
13.2																															0.297116
13.22																															0.322313
13.24																															0.31683
13.26																															0.308558
13.28																															0.29918
13.3																															0.346402
13.32																															0.288843
13.34																															0.341782
13.36																															0.29381
13.38																															0.289754
13.4																															0.304033
13.42																															0.312263
13.44																															0.317303
13.46																															0.309596
13.48																															0.291157
13.5																															0.300919
13.52																															0.309569
13.54																															0.286446
13.56																															0.293621
13.58																															0.323648
13.6																															0.287923
13.62																															0.327788
13.64																															0.277869
13.66																															0.331115
13.68																															0.319172
13.7																															0.304556
13.72																															0.302013
13.74																															0.351906
13.76																															0.343543
13.78																															0.331358
13.8																															0.317224
13.82																															0.316844
13.84																															0.294155
13.86																															0.325257
13.88																															0.293187
13.9																															0.301906
13.92																															0.322526
13.94																															0.329787
13.96																															0.301293
13.98																															0.329517
14																															0.297643
14.02																															0.328435
14.04																															0.322514
14.06																															0.315543
14.08																															0.325927
14.1																															0.314005
14.12																															0.317462
14.14																															0.343694
14.16																															0.338877
14.18																															0.366326
14.2																															0.328228
14.22																															0.294516
14.24																															0.294897
14.26																															0.309583
14.28																															0.322964
14.3																															0.326623
14.32																															0.340929
14.34																															0.323293
14.36																															0.3149
14.38																															0.332722
14.4																															0.326622
14.42																															0.311061
14.44																															0.36294
14.46																															0.356989
14.48																															0.36272
14.5																															0.340476
14.52																															0.333141
14.54																															0.329851
14.56																															0.345274
14.58																															0.320852
14.6																															0.323092
14.62																															0.320809
14.64																															0.343723
14.66																															0.320002
14.68																															0.35225
14.7																															0.335119
14.72																															0.337506
14.74																															0.300509
14.76																															0.318751
14.78																															0.324032
14.8																															0.32574
14.82																															0.330632
14.84																															0.351259
14.86																															0.306339
14.88																															0.378351
14.9																															0.330628
14.92																															0.35609
14.94																															0.303431
14.96																															0.360136
14.98																															0.326653
15																															0.333148
15.02																															0.37505
15.04																															0.354659
15.06
15.08																															0.347538
15.1																															0.337467
15.12																															0.324686
15.14																															0.329706
15.16																															0.344978
15.18																															0.305418
15.2																															0.332419
15.22																															0.380529
15.24																															0.357109
15.26																															0.33711
15.28																															0.328234
15.3																															0.342684
15.32																															0.360725
15.34																															0.339879
15.36																															0.41327
15.38																															0.337924
15.4																															0.31746
15.42																															0.359223
15.44																															0.363476
15.46																															0.327939
15.48																															0.368154
15.5																															0.361084
15.52																															0.34193
15.54
15.56																															0.344915
15.58																															0.36205
15.6																															0.335549
15.62																															0.329902
15.64																															0.367864
15.66																															0.371413
15.68																															0.331688
15.7																															0.372813
15.72																															0.349093
15.74																															0.373122
15.76																															0.319684
15.78																															0.369766
15.8																															0.370997
15.82																															0.359562
15.84																															0.391041
15.86																															0.341449
15.88																															0.347229
15.9																															0.365321
15.92																															0.3459
15.94																															0.372621
15.96																															0.339664
15.98																															0.358151
16																															0.32784
16.02																															0.394701
16.04																															0.36386
16.06																															0.36817
16.08																															0.376749
16.1																															0.344205
16.12																															0.327509
16.14																															0.372856
16.16																															0.321993
16.18																															0.396409
16.2																															0.378205
16.22																															0.340051
16.24																															0.374219
16.26																															0.359736
16.28																															0.368959
16.3																															0.36113
16.32																															0.384353
16.34																															0.380908
16.36																															0.339633
16.38																															0.399428
16.4																															0.376976
16.42																															0.318882
16.44																															0.341412
16.46																															0.341516
16.48																															0.373698
16.5																															0.380053
16.52																															0.378516
16.54																															0.388746
16.56																															0.351575
16.58																															0.350787
16.6																															0.404397
16.62																															0.369216
16.64																															0.354909
16.66																															0.359939
16.68																															0.355527
16.7																															0.403402
16.72																															0.399254
16.74																															0.387669
16.76																															0.396161
16.78																															0.370866
16.8																															0.415921
16.82																															0.367193
16.84																															0.373676
16.86																															0.414075
16.88																															0.414695
16.9																															0.359474
16.92
16.94																															0.387899
16.96																															0.382435
16.98																															0.388678
17																															0.39227
17.02																															0.425596
17.04																															0.417135
17.06																															0.41799
17.08																															0.371606
17.1																															0.412043
17.12																															0.353475
17.14
17.16
17.18
17.2
17.22
17.24
17.26
17.28
17.3
17.32
17.34
17.36
17.38
17.4
17.42
17.44
17.46
17.48
17.5
17.52
17.54
17.56
17.58
17.6
17.62
17.64
17.66
17.68
17.7
17.72
17.74
17.76
17.78
17.8
17.82
17.84
17.86
17.88
17.9
17.92
17.94
17.96
17.98
18
18.02
18.04
18.06
18.08
18.1
18.12
18.14
18.16
18.18
18.2
18.22
18.24
18.26
18.28
18.3
18.32
18.34
18.36
18.38
18.4
18.42
18.44
18.46
18.48
18.5
18.52
18.54
18.56
18.58
18.6
18.62
18.64
18.66
18.68
18.7
18.72
18.74
18.76
18.78
18.8
18.82
18.84
18.86
18.88
18.9
18.92
18.94
18.96
18.98
19
19.02
19.04
19.06
19.08
19.1
19.12
19.14
19.16
19.18
19.2
19.22
19.24
19.26
19.28
19.3
19.32
19.34
19.36
19.38
19.4
19.42
19.44
19.46
19.48
19.5
19.52
19.54
19.56
19.58
19.6
19.62
19.64
19.66
19.68
19.7
19.72
19.74
19.76
19.78
19.8
19.82
19.84
19.86
19.88
19.9
19.92
19.94
19.96
19.98
20
20.02
20.04
20.06
20.08
20.1
20.12
20.14
20.16
20.18
20.2
20.22
20.24
20.26
20.28
20.3
20.32
20.34
20.36
20.38
20.4
20.42
20.44
20.46
20.48
20.5
20.52
20.54
20.56
20.58
20.6
20.62
20.64
20.66
20.68
20.7
20.72
20.74
20.76
20.78
20.8
20.82
20.84
20.86
20.88
20.9
20.92
20.94
20.96
20.98
21
21.02
21.04
21.06
21.08
21.1
21.12
21.14
21.16
21.18
21.2
21.22
21.24
21.26
21.28
21.3
21.32
21.34
21.36
21.38
21.4
21.42
21.44
21.46
21.48
21.5
21.52
21.54
21.56
21.58
21.6
21.62
21.64
21.66
21.68
21.7
21.72
21.74
21.76
21.78
21.8
21.82
21.84
21.86
21.88
21.9
21.92
21.94
21.96
21.98
22
22.02
22.04
22.06
22.08
22.1
22.12
22.14
22.16
22.18
22.2
22.22
22.24
22.26
22.28
22.3
22.32
22.34
22.36
22.38
22.4
22.42
22.44
22.46
22.48
22.5
22.52
22.54
22.56
22.58
22.6
22.62
22.64
22.66
22.68
22.7
22.72
22.74
22.76
22.78
22.8
22.82
22.84
22.86
22.88
22.9
22.92
22.94
22.96
22.98
23
23.02
23.04
23.06
23.08
23.1
23.12
23.14
23.16
23.18
23.2
23.22
23.24
23.26
23.28
23.3
23.32
23.34
23.36
23.38
23.4
23.42
23.44
23.46
23.48
23.5
23.52
23.54
23.56
23.58
23.6
23.62
23.64
23.66
23.68
23.7
23.72
23.74
23.76
23.78
23.8
23.82
23.84
23.86
23.88
23.9
23.92
23.94
23.96
23.98
24
24.02
24.04
24.06
24.08
24.1
24.12
24.14
24.16
24.18
24.2
24.22
24.24
24.26
24.28
24.3
24.32
24.34
24.36
24.38
24.4
24.42
24.44
24.46
24.48
24.5
24.52
24.54
24.56
24.58
24.6
24.62
24.64
24.66
24.68
24.7
24.72
24.74
24.76
24.78
24.8
24.82
24.84
24.86
24.88
24.9
24.92
24.94
24.96
24.98
25
25.02
25.04
25.06
25.08
25.1
25.12
25.14
25.16
25.18
25.2
25.22
25.24
25.26
25.28
25.3
25.32
25.34
25.36
25.38
25.4
25.42
25.44
25.46
25.48
25.5
25.52
25.54
25.56
25.58
25.6
25.62
25.64
25.66
25.68
25.7
25.72
25.74
25.76
25.78
25.8
25.82
25.84
25.86
25.88
25.9
25.92
25.94
25.96
25.98
26
26.02
26.04
26.06
26.08
26.1
26.12
26.14
26.16
26.18
26.2
26.22
26.24
26.26
26.28
26.3
26.32
26.34
26.36
26.38
26.4
26.42
26.44
26.46
26.48
26.5
26.52
26.54
26.56
26.58
26.6
26.62
26.64
26.66
26.68
26.7
26.72
26.74
26.76
26.78
26.8
26.82
26.84
26.86
26.88
26.9
26.92
26.94
26.96
26.98
27
27.02
27.04
27.06
27.08
27.1
27.12
27.14
27.16
27.18
27.2
27.22
27.24
27.26
27.28
27.3
27.32
27.34
27.36
27.38
27.4
27.42
27.44
27.46
27.48
27.5
27.52
27.54
27.56
27.58
27.6
27.62
27.64
27.66
27.68
27.7
27.72
27.74
27.76
27.78
27.8
27.82
27.84
27.86
27.88
27.9
27.92
27.94
27.96
27.98
28
28.02
28.04
28.06
28.08
28.1
28.12
28.14
28.16
28.18
28.2
28.22
28.24
28.26
28.28
28.3
28.32
28.34
28.36
28.38
28.4
28.42
28.44
28.46
28.48
28.5
28.52
28.54
28.56
28.58
28.6
28.62
28.64
28.66
28.68
28.7
28.72
28.74
28.76
28.78
28.8
28.82
28.84
28.86
28.88
28.9
28.92
28.94
28.96
28.98
29
29.02
29.04
29.06
29.08
29.1
29.12
29.14
29.16
29.18
29.2
29.22
29.24
29.26
29.28
29.3
29.32
29.34
29.36
29.38
29.4
29.42
29.44
29.46
29.48
29.5
29.52
29.54
29.56
29.58
29.6
29.62
29.64
29.66
29.68
29.7
29.72
29.74
29.76
29.78
29.8
29.82
29.84
29.86
29.88
29.9
29.92
29.94
29.96
29.98
30
30.02
30.04
30.06
30.08
30.1
30.12
30.14
30.16
30.18
30.2
30.22
30.24
30.26
30.28
30.3
30.32
30.34
30.36
30.38
30.4
30.42
30.44
30.46
30.48
30.5
30.52
30.54
30.56
30.58
30.6
30.62
30.64
30.66
30.68
30.7
30.72
30.74
30.76
30.78
30.8
30.82
30.84
30.86
30.88
30.9
30.92
30.94
30.96
30.98
31
31.02
31.04
31.06
31.08
31.1
31.12
31.14
31.16
31.18
31.2
31.22
31.24
31.26
31.28
31.3
31.32
31.34
31.36
31.38
31.4
31.42
31.44
31.46
31.48
31.5
31.52
31.54
31.56
31.58
31.6
31.62
31.64
31.66
31.68
31.7
31.72
31.74
31.76
31.78
31.8
31.82
31.84
31.86
31.88
31.9
31.92
31.94
31.96
31.98
32
32.02
32.04
32.06
32.08
32.1
32.12
32.14
32.16
32.18
32.2
32.22
32.24
32.26
32.28
32.3
32.32
32.34
32.36
32.38
32.4
32.42
32.44
32.46
32.48
32.5
32.52
32.54
32.56
32.58
32.6
32.62
32.64
32.66
32.68
32.7
32.72
32.74
32.76
32.78
32.8
32.82
32.84
32.86
32.88
32.9
32.92
32.94
32.96
32.98
33
33.02
33.04
33.06
33.08
33.1
33.12
33.14
33.16
33.18
33.2
33.22
33.24
33.26
33.28
33.3
33.32
33.34
33.36
33.38
33.4
33.42
33.44
33.46
33.48
33.5
33.52
33.54
33.56
33.58
33.6
33.62
33.64
33.66
33.68
33.7
33.72
33.74
33.76
33.78
33.8
33.82
33.84
33.86
33.88
33.9
33.92
33.94
33.96
33.98
34
34.02
34.04
34.06
34.08
34.1
34.12
34.14
34.16
34.18
34.2
34.22
34.24
34.26
34.28
34.3
34.32
34.34
34.36
34.38
34.4
34.42
34.44
34.46
34.48
34.5
34.52
34.54
34.56
34.58
34.6
34.62
34.64
34.66
34.68
34.7
34.72
34.74
34.76
34.78
34.8
34.82
34.84
34.86
34.88
34.9
34.92
34.94
34.96
34.98
35
35.02
35.04
35.06
35.08
35.1
35.12
35.14
35.16
35.18
35.2
35.22
35.24
35.26
35.28
35.3
35.32
35.34
35.36
35.38
35.4
35.42
35.44
35.46
35.48
35.5
35.52
35.54
35.56
35.58
35.6
35.62
35.64
35.66
35.68
35.7
35.72
35.74
35.76
35.78
35.8
35.82
35.84
35.86
35.88
35.9
35.92
35.94
35.96
35.98
36
36.02
36.04
36.06
36.08
36.1
36.12
36.14
36.16
36.18
36.2
36.22
36.24
36.26
36.28
36.3
36.32
36.34
36.36
36.38
36.4
36.42
36.44
36.46
36.48
36.5
36.52
36.54
36.56
36.58
36.6
36.62
36.64
36.66
36.68
36.7
36.72
36.74
36.76
36.78
36.8
36.82
36.84
36.86
36.88
36.9
36.92
36.94
36.96
36.98
37
37.02
37.04
37.06
37.08
37.1
37.12
37.14
37.16
37.18
37.2
37.22
37.24
37.26
37.28
37.3
37.32
37.34
37.36
37.38
37.4
37.42
37.44
37.46
37.48
37.5
37.52
37.54
37.56
37.58
37.6
37.62
37.64
37.66
37.68
37.7
37.72
37.74
37.76
37.78
37.8
37.82
37.84
37.86
37.88
37.9
37.92
37.94
37.96
37.98
38
38.02
38.04
38.06
38.08
38.1
38.12
38.14
38.16
38.18
38.2
38.22
38.24
38.26
38.28
38.3
38.32
38.34
38.36
38.38
38.4
38.42
38.44
38.46
38.48
38.5
38.52
38.54
38.56
38.58
38.6
38.62
38.64
38.66
38.68
38.7
38.72
38.74
38.76
38.78
38.8
38.82
38.84
38.86
38.88
38.9
38.92
38.94
38.96
38.98
39
39.02
39.04
39.06
39.08
39.1
39.12
39.14
39.16
39.18
39.2
39.22
39.24
39.26
39.28
39.3
39.32
39.34
39.36
39.38
39.4
39.42
39.44
39.46
39.48
39.5
39.52
39.54
39.56
39.58
39.6
39.62
39.64
39.66
39.68
39.7
39.72
39.74
39.76
39.78
39.8
39.82
39.84
39.86
39.88
39.9
39.92
39.94
39.96
[truncated: 2,544 more rows]

## Sheet: SKs
time
	210616s1t1	210616s1t2	210616s2t4	210616s2t6	210616s3t1	210805s1t1	210805s1t2	210805s1t4	210805s1t5	210805s1t7	210805s1t11	210805s3t2	210805s3t3	210805s3t4	210805s3t7	210805s3t8	210805s3t9	210805s3t10	210805s3t16	210805s3t17	210805s3t18	210805s3t20	210805s3t22	210805s3t23	210805s3t24	210805s3t25	210805s3t28	210805s3t29	210805s3t32	210805s3t33	230504s2t1	230504s2t6	230504s2t7	230504s2t8	230504s2t10	230504s2t13	230504s2t14	230504s2t18	230504s2t21	230504s2t22	230504s2t24	230504s3t2	230504s3t7	230504s3t8	230504s3t16
0.02	0.203568	0.281656	0.224707	0.298199	0.227589	0.28622	0.318129		0.216503		0.161797	0.224423		0.197779	0.149498	0.172308	0.370551	0.244935	0.203879	0.181399	0.0381342	0.116724	0.0745934	0.259665	0.162182	0.212799	0.172364	0.231674	0.259198	0.153387	0.187821	0.166119	0.228701	0.169566	0.153841	0.153987		0.100571	0.18904	0.075166	0.174266	0.154959	0.192403	0.166242	0.280925
0.04	0.271317	0.345911	0.283526	0.360331	0.287989		0.378835	0.339453	0.317044	0.195477	0.209693	0.316037	0.157587	0.224249	0.228177	0.248589	0.455525	0.363406	0.270326	0.249101	0.184406	0.198044	0.112562	0.334327	0.254075	0.262432	0.249216	0.30258	0.310637	0.169689	0.254796	0.230707	0.242438	0.226851	0.189703	0.219578	0.184574	0.14861	0.25939	0.117815	0.194609	0.211379	0.263861	0.22817	0.335642
0.06	0.282125	0.366211	0.282286	0.43579	0.297397	0.261867	0.39223	0.369385	0.335961	0.235537	0.408826	0.391814	0.180918	0.263777	0.253407	0.296634	0.494211	0.49294	0.282388	0.265141	0.238008	0.229433	0.11122	0.34279	0.30594	0.287433	0.283514	0.376257	0.396066	0.189588	0.273329	0.287812	0.277412	0.268542	0.239283	0.223971	0.215349	0.205008	0.29175	0.13172	0.212596	0.200049	0.299453	0.240154	0.361831
0.08	0.293934	0.382437	0.30076	0.45273	0.329073	0.348112	0.430707	0.402156	0.367872	0.244309	0.242926	0.42846	0.21034	0.288647	0.275912	0.359142	0.588015	0.454903	0.302898	0.22798	0.248669	0.24063	0.123847	0.396694	0.329494	0.3157	0.345562	0.403778	0.42681	0.203317	0.286514	0.308795	0.257135	0.276473	0.267114	0.256844	0.243594	0.232307	0.2912	0.144859	0.232956	0.256691	0.339566	0.255367	0.398828
0.1	0.304177	0.402314	0.307281	0.47577	0.341541	0.231125	0.461222	0.391287	0.372839	0.272172	0.622726	0.475068	0.233827	0.28124	0.304524	0.397049	0.607836		0.319036	0.305207	0.260223	0.266656	0.160638	0.401692	0.340675	0.334289	0.339422	0.380806	0.39998	0.244693	0.291976	0.332704	0.283411	0.332818	0.308475	0.265297	0.245604	0.25201	0.33389	0.165194	0.248333	0.239574	0.368437	0.379053	0.419255
0.12	0.325872	0.414176	0.329343	0.495783	0.349411	0.388047	0.50211	0.405918	0.401439	0.284066		0.463524	0.228398		0.311945	0.466617			0.313132	0.342413	0.279847	0.262418	0.171755	0.363774		0.330066	0.370364			0.235924	0.306923	0.342048	0.285939	0.345696	0.322379	0.284553	0.277523	0.263044	0.339922	0.178239	0.259578	0.223192	0.358958		0.430733
0.14	0.321893	0.435844	0.336791	0.510382	0.367105	0.427405	0.511889	0.419993	0.430455	0.296493		0.484012	0.230473		0.298468				0.326485	0.349316	0.313736	0.286707	0.171887	0.363889		0.357407	0.325897			0.263358	0.305519		0.330401	0.368076	0.3207	0.307912	0.29951	0.283693	0.353623	0.177783	0.267686	0.259782	0.408361		0.423619
0.16	0.332555	0.446013	0.326459	0.498683	0.376229	0.429774	0.567122	0.416844	0.434191	0.300125		0.407107	0.248175		0.3219				0.338175	0.391833	0.331693	0.296537	0.180011	0.410153		0.355888				0.276548	0.317968	0.344792	0.315053	0.377341	0.362669		0.334116	0.307573	0.371444	0.178063	0.299061	0.249625	0.397437		0.435213
0.18	0.3384	0.449527	0.354281		0.373837			0.408613	0.437917	0.319315			0.25841		0.329463				0.337728	0.394715		0.306088	0.205245	0.393944		0.3651				0.263336	0.340734	0.350105	0.350969	0.364225	0.373034	0.357635	0.33974	0.321666	0.387885	0.20032	0.301566	0.251612	0.419219		0.459666
0.2	0.325885	0.461468	0.350934		0.381445	0.514449		0.416813	0.453614	0.304176			0.27114		0.342706				0.37405	0.474485		0.318337	0.200556	0.430422		0.36726				0.271892	0.327417		0.340249	0.367076	0.374425		0.351301	0.255891	0.402577	0.201701	0.285735	0.253178	0.417946		0.470302
0.22	0.334092	0.456387	0.357278		0.378199	0.522952		0.405395	0.454344	0.346597			0.267353		0.33276				0.3519	0.457834		0.311346	0.195816	0.427707		0.378562				0.292955	0.339677	0.394211	0.337069	0.402497	0.387786				0.451435	0.210016	0.298819	0.25998	0.427534		0.501002
0.24	0.352338	0.490553	0.359526		0.400075	0.528344		0.414677	0.475615	0.346154			0.265896		0.355604				0.370189			0.312558	0.199247	0.406629		0.381043				0.292456	0.335575		0.350609	0.366791	0.436201					0.211764	0.31441	0.27619	0.412507		0.504993
0.26	0.337357	0.484559	0.357972		0.40795			0.441733	0.485195	0.363994			0.280955		0.363226				0.359423			0.329745	0.210825	0.439175		0.388746				0.287621	0.332659		0.344281	0.39107						0.205663	0.306849	0.273821	0.406078		0.493451
0.28	0.347437		0.363661		0.41312			0.42167	0.469891	0.376051			0.294524		0.358418				0.384828			0.347625	0.204766	0.412574		0.398934				0.308319	0.340703	0.382851	0.335861	0.424456						0.212324	0.329321	0.273124	0.416781		0.5234
0.3	0.357443		0.3681		0.416541			0.465692	0.529787	0.399837			0.303345		0.368943				0.402718			0.335457	0.226894	0.437138		0.410623				0.313886	0.359145		0.35584	0.422337						0.224839	0.328499	0.276127	0.415528		0.51481
0.32	0.34025		0.362176		0.419315			0.442372	0.5346	0.439183			0.318086		0.368027				0.414609			0.36526	0.23159	0.45048		0.404865				0.308084	0.340963		0.348423	0.434155						0.219574	0.323127	0.296426	0.425508		0.504387
0.34	0.352573		0.385377		0.421994			0.434701	0.53683	0.438195			0.32005		0.377622				0.399487			0.356171	0.241944	0.446708		0.411927				0.325583	0.361773	0.411182	0.361355	0.446168						0.229614	0.336451	0.308435	0.412298		0.54997
0.36	0.361701		0.379865		0.450693			0.470332	0.549194				0.329833		0.386488				0.405509			0.364377	0.223755	0.448724		0.416082				0.32301	0.364262	0.430926	0.378547	0.439266						0.247156	0.321804	0.283996	0.416625		0.510872
0.38	0.357692		0.382196		0.451835			0.438518	0.533469				0.308419		0.401074				0.377241			0.381018	0.249472	0.44713		0.417362				0.315079	0.358131		0.388956	0.440457						0.254626	0.322828	0.278294	0.408991		0.512679
0.4	0.368655		0.396135		0.461875			0.438176	0.548376						0.398631				0.462817			0.375246	0.221803	0.448803		0.427383				0.321232	0.378741		0.380801	0.484402						0.249488	0.338396	0.294704	0.418489		0.523495
0.42	0.370637		0.406811		0.459852			0.465725	0.590988						0.395209				0.429522			0.375412	0.246962	0.473233		0.436517				0.328765	0.373458		0.394371	0.472528						0.25814	0.357154	0.303678	0.409498		0.511262
0.44	0.372493		0.401588		0.456189			0.435459	0.593248						0.411943				0.466576			0.381853	0.276868	0.486178		0.435966				0.306446	0.386637		0.370885	0.470185						0.253364	0.357113	0.294137	0.44112		0.35241
0.46	0.363737		0.408183		0.45781			0.454354	0.591367						0.405165				0.473945			0.38489	0.274602	0.490098		0.424389				0.334641	0.39192		0.413088	0.460444						0.282974	0.365776	0.296148	0.454463
0.48	0.378404		0.420619		0.464079			0.428076	0.614225						0.409496				0.487648			0.393407	0.261946	0.473859		0.430953				0.317247	0.365709		0.396449	0.483783						0.278334	0.360812	0.285106	0.413421
0.5	0.366929		0.427479		0.458938			0.461519	0.62266						0.4308				0.502528			0.40967	0.2432	0.4883		0.430078				0.324795	0.382951		0.399769	0.476962						0.289276	0.361961	0.304877	0.385681
0.52	0.365381		0.417679		0.462241			0.480503	0.654817						0.435339				0.538251			0.421362	0.271344	0.467305		0.438802				0.33147	0.381824		0.417262	0.49445						0.305306	0.376366	0.322833	0.382547
0.54	0.381909		0.43185		0.479162			0.502318	0.642737						0.438108				0.535499			0.408572	0.254154	0.500739		0.454392				0.321501	0.370114		0.401072	0.515736						0.306798	0.37425	0.299709	0.418553
0.56	0.374291		0.426104		0.500202			0.463661	0.670116						0.438052				0.572418			0.440604	0.264576	0.51472		0.44412				0.33679	0.377953		0.412412	0.494667							0.369869	0.296333	0.390509
0.58	0.359171		0.4247		0.50994			0.448254	0.696368						0.460841							0.440379	0.24577	0.546574		0.44694				0.326353	0.395982		0.396982	0.540748							0.373305	0.3258	0.400039
0.6	0.379725		0.420824		0.541744			0.481574							0.457405							0.436332	0.241102	0.498423		0.462349				0.335545	0.386416		0.406333	0.497779							0.365481	0.304619	0.415546
0.62	0.37152		0.430385		0.528612			0.435011							0.452676							0.447562	0.269457	0.527862		0.465827				0.358263	0.386925		0.410391	0.54083							0.387394	0.330728	0.409484
0.64	0.384683		0.428245		0.54445			0.496065							0.458849							0.462989	0.281678	0.50743		0.454786				0.34684	0.395902		0.413847	0.525096							0.397939	0.290687	0.429302
0.66	0.38043		0.434336		0.544179			0.466912							0.47113							0.389028	0.276572	0.545783		0.458563				0.33135	0.38561		0.430242	0.540649							0.378028	0.332036	0.407542
0.68	0.369399		0.435269		0.562192			0.488813							0.468041								0.289185	0.525475		0.463735				0.367067	0.391296		0.434796	0.535941							0.410987	0.327452	0.388142
0.7	0.397311		0.434776		0.563102			0.497414							0.476712								0.296798	0.515785		0.467685				0.351312	0.399235		0.449182	0.537497							0.404369	0.337069	0.425534
0.72	0.39394		0.437199		0.578647			0.450663							0.483243								0.303305	0.537639		0.473485				0.349984	0.392192		0.430211	0.570548							0.387324	0.282989	0.418864
0.74	0.398388		0.440442		0.587175			0.468372							0.500427								0.294862	0.552028		0.472434				0.358313	0.386658		0.436555	0.549684							0.437846	0.310411	0.410704
0.76	0.373986		0.438786		0.56523			0.463158							0.502494								0.309719	0.517443		0.475429				0.384163	0.399621		0.434529	0.566131							0.428824	0.331108	0.437789
0.78	0.407777		0.43741		0.596035			0.490961							0.493061								0.300288	0.514265		0.473953				0.366538	0.396234		0.417761	0.554762							0.399489	0.316869	0.425573
0.8	0.378823		0.434984		0.59741			0.466891							0.479589								0.288669	0.535921		0.493339				0.353077	0.386575		0.456456	0.548018							0.420446	0.309266	0.387702
0.82	0.393385		0.431241		0.613575			0.468759							0.484604								0.315604	0.53307		0.481206				0.387893	0.390103		0.444926	0.565545							0.429235	0.350141	0.422968
0.84	0.397899		0.427198		0.608499			0.470914							0.503065								0.327901	0.546853		0.480763				0.352976	0.400206		0.446183	0.595311							0.415767	0.316657	0.418281
0.86	0.376369		0.42949		0.623163			0.471746							0.516061								0.336663	0.53326		0.485265				0.379419	0.405899		0.464764	0.59807							0.430388	0.342554	0.411058
0.88	0.38692		0.437238		0.62951			0.464256							0.500388								0.33261	0.545708		0.473159				0.384286	0.404422		0.4605	0.573135							0.448369	0.345859	0.417008
0.9	0.385686		0.434925		0.63488			0.450536							0.510657								0.341928	0.504899		0.483095				0.382607	0.405835		0.463116	0.57905							0.448789	0.328444	0.406326
0.92	0.389614		0.447213		0.630151			0.445756							0.510107								0.351241	0.538254		0.490699				0.379493	0.384762		0.47674	0.580043							0.450538	0.338836	0.26983
0.94	0.379118		0.44386		0.666926			0.485304							0.515234								0.360391	0.525822		0.510845				0.378794	0.414948		0.46491	0.421666							0.44026	0.346325
0.96	0.389482		0.43779					0.442468							0.52202								0.324416	0.565031		0.50187				0.368705	0.402262		0.440809								0.480511	0.329274
0.98	0.386585		0.440889					0.441665							0.521831								0.349369	0.51695		0.502887				0.400473	0.406784										0.473343	0.341271
1	0.381995		0.449535					0.454052							0.525289								0.351296	0.426454		0.495457				0.401117	0.407974		0.483843								0.478445	0.328602
1.02	0.380229		0.457949					0.456536							0.512655								0.380541			0.508503					0.41777		0.47946									0.3278
1.04	0.389521		0.417459					0.4786							0.52682								0.367521			0.507993					0.399145		0.481919									0.313922
1.06	0.385418		0.441307					0.481089							0.537554								0.373025			0.512851					0.414408											0.354896
1.08	0.392992		0.449692					0.494347							0.527321											0.503373					0.400446		0.495209									0.361406
1.1	0.397158		0.443804					0.519546							0.540416											0.511978					0.398808		0.474046									0.350423
1.12	0.390671		0.440191					0.467527							0.557089											0.508475					0.404586											0.348181
1.14	0.391453		0.461428					0.459688							0.54879											0.509846					0.409472		0.48006									0.327949
1.16	0.38848		0.457924					0.491616							0.570374											0.523634					0.417872		0.501221									0.348636
1.18	0.38543		0.44867					0.477299							0.562525											0.506878					0.398045		0.496609									0.357222
1.2	0.394064		0.46339					0.496713							0.563038											0.518036					0.423467		0.494586									0.31688
1.22	0.392999		0.440839					0.491356							0.567687											0.515906					0.413831		0.471757									0.347714
1.24	0.387462		0.44279					0.493858							0.580365											0.52116					0.429643		0.476167									0.340956
1.26	0.396736		0.4539					0.482188							0.584941											0.530155					0.411241		0.467026									0.370655
1.28	0.402517		0.473201					0.513076							0.580262											0.519044					0.415706											0.352763
1.3	0.384663		0.448677					0.475345							0.586345											0.518249					0.411598											0.376637
1.32	0.381144		0.462589					0.495859							0.593924											0.537827					0.421766											0.335007
1.34	0.38895		0.465269					0.480837							0.576864											0.515223					0.430037											0.338835
1.36	0.380833		0.449525					0.485068							0.591144											0.523776					0.428901											0.352879
1.38	0.388982		0.467809					0.481426							0.596326											0.525782					0.424732											0.389278
1.4	0.391658		0.460036					0.492759							0.604658											0.5362					0.430871											0.354737
1.42	0.379331		0.458047					0.501482							0.599231											0.526137					0.425187											0.366114
1.44	0.394015		0.46949					0.497278							0.586038											0.528944					0.423784											0.360455
1.46	0.384992		0.447225					0.462038							0.598122											0.541825					0.433435											0.32864
1.48	0.390899		0.466622					0.458171							0.620764											0.539332					0.427343											0.346485
1.5	0.403478		0.467641					0.468818							0.612992											0.524917					0.430656											0.364345
1.52	0.381362		0.455867					0.465436							0.617413											0.525617					0.426158											0.372815
1.54	0.394491		0.481605					0.441399							0.609314											0.543759					0.424705											0.339525
1.56	0.381298		0.460208					0.466732							0.625356											0.543101					0.427093											0.386655
1.58	0.398881		0.462394					0.467076							0.631826											0.536151					0.431016											0.37568
1.6	0.389638		0.470162					0.455196							0.652311											0.535428					0.429884											0.362646
1.62	0.396683		0.466834					0.479381							0.647151											0.528978					0.426651											0.362141
1.64	0.390347		0.46892					0.439991							0.662085											0.535931					0.427268											0.35236
1.66	0.389201		0.461547					0.453118							0.653479											0.541821					0.430552											0.334456
1.68	0.385082		0.472114					0.43931							0.659743											0.535892					0.414781											0.366487
1.7	0.383639		0.468747					0.445675							0.646748											0.529221					0.427619											0.370666
1.72	0.393316		0.447373					0.345904							0.670579											0.531844					0.427747											0.376619
1.74	0.405541		0.461291												0.671296											0.544877					0.434285											0.374513
1.76	0.388726		0.485181												0.668021											0.532658					0.425211											0.371044
1.78	0.393541		0.467014												0.674133											0.53845					0.446971											0.387002
1.8	0.405631		0.472347												0.690874											0.53754					0.435437											0.365301
1.82	0.389483		0.501662												0.686746											0.536726					0.440734											0.339682
1.84	0.401055		0.50049																							0.544022					0.434143											0.349337
1.86	0.386675		0.460546																							0.538534					0.442939											0.373148
1.88	0.388921		0.466438																							0.532768					0.425118											0.366023
1.9	0.397973		0.470066																							0.538656					0.425314											0.369828
1.92	0.40103		0.456099																							0.542645					0.425564											0.377057
1.94	0.401613		0.472715																							0.53528					0.433132											0.388669
1.96	0.407399		0.470308																							0.547518					0.436547											0.340176
1.98	0.405947		0.455459																							0.527016					0.43808											0.368665
2	0.424148		0.468625																							0.53543					0.432903											0.370913
2.02	0.432612		0.457559																							0.543003					0.445283											0.384816
2.04	0.416771		0.488745																							0.541195					0.438024											0.399559
2.06	0.433187		0.470469																							0.551647					0.425048											0.395387
2.08	0.432008		0.459937																							0.542625					0.444933											0.395967
2.1	0.42997		0.436744																							0.536723					0.437951											0.354934
2.12	0.436371		0.469684																							0.532428					0.433617											0.36788
2.14	0.44244		0.473716																							0.530847					0.441925											0.401235
2.16	0.437567		0.458753																							0.544056					0.442505											0.363702
2.18	0.443136		0.4764																							0.533329					0.429199											0.370894
2.2	0.44206		0.453534																							0.536436					0.434849											0.369983
2.22	0.436929		0.491341																							0.541764					0.436563											0.395763
2.24	0.440014		0.46178																							0.541564					0.429765											0.398564
2.26	0.438828		0.467903																							0.542205					0.448427											0.39389
2.28	0.434761		0.476569																							0.541051					0.439907											0.369948
2.3	0.439634		0.486281																							0.554259					0.432752											0.396719
2.32	0.44341		0.467692																							0.546733					0.437666											0.407013
2.34	0.436403		0.513194																							0.544501					0.427787											0.369286
2.36	0.441544		0.492395																							0.548349					0.435576											0.355738
2.38	0.448162		0.490837																							0.546461					0.438134											0.378681
2.4	0.442245		0.451022																							0.545219					0.427203											0.368561
2.42	0.450836		0.466894																							0.547062					0.427296											0.36729
2.44	0.463358		0.477679																							0.549595					0.445145											0.391747
2.46	0.463396		0.471507																							0.549395					0.454265											0.422314
2.48	0.473772		0.465453																							0.556572					0.440501											0.370638
2.5	0.469144		0.44886																							0.539147					0.435581											0.400222
2.52	0.473321		0.459003																							0.543016					0.448516											0.368078
2.54	0.47394		0.474667																							0.54869					0.445779											0.417367
2.56	0.481331		0.477779																							0.544339					0.445099											0.41034
2.58	0.48282		0.480795																							0.551995					0.442349											0.418253
2.6	0.481959		0.477103																							0.547746					0.440407											0.394363
2.62	0.491982		0.492086																							0.554506					0.441853											0.388407
2.64	0.483073		0.477265																							0.541727					0.444975											0.395361
2.66	0.501551		0.465157																							0.555729					0.441533											0.422039
2.68	0.505453		0.481177																							0.538024					0.442804											0.37735
2.7	0.50287		0.47035																							0.545972					0.43988											0.401923
2.72	0.500573		0.501152																							0.562489					0.44193											0.40203
2.74	0.505866		0.491939																							0.55514					0.446551											0.393082
2.76	0.52275		0.498072																							0.54905					0.455607											0.370729
2.78	0.521181		0.481227																							0.561429					0.449153											0.403402
2.8	0.523045		0.480743																							0.556821					0.442445											0.396613
2.82	0.534121		0.481203																							0.55442					0.447662											0.367964
2.84	0.535432		0.515816																							0.55784					0.453941											0.353363
2.86	0.543173		0.523938																							0.550126					0.449173											0.417935
2.88	0.552693		0.514779																							0.546174					0.458614											0.364064
2.9	0.548143		0.478201																							0.562216					0.458097											0.383642
2.92	0.528274		0.482127																							0.552444					0.438912											0.373578
2.94			0.486379																							0.554811					0.451194											0.378305
2.96			0.481229																							0.565165					0.452793											0.408289
2.98			0.503461																							0.550688					0.455783											0.389043
3			0.47774																							0.553454					0.453176											0.404332
3.02			0.492896																							0.565747					0.438329											0.394799
3.04			0.504863																							0.551613					0.450314											0.40212
3.06			0.509106																							0.561124					0.45459											0.41501
3.08			0.501375																							0.545289					0.453477											0.400463
3.1			0.508216																							0.562216					0.44349											0.400224
3.12			0.49796																							0.5693					0.454947											0.428108
3.14			0.492178																							0.560725					0.464161											0.426323
3.16			0.5086																							0.559201					0.4676											0.417869
3.18			0.485683																							0.577919					0.466325											0.382998
3.2			0.509827																							0.572621					0.470462											0.428727
3.22			0.516255																							0.567233					0.468215											0.405259
3.24			0.51063																							0.578552					0.461274											0.403875
3.26			0.523928																							0.579946					0.480933											0.402337
3.28			0.515382																							0.582926					0.477493											0.396773
3.3			0.526793																							0.57296					0.471832											0.377773
3.32			0.499763																							0.569788					0.488557											0.406482
3.34			0.526893																							0.58068					0.475801											0.403479
3.36			0.527797																							0.585572					0.459993											0.407856
3.38			0.498643																							0.586839					0.471971											0.401331
3.4			0.53873																							0.585516					0.474579											0.40471
3.42			0.497367																							0.574217					0.482718											0.392099
3.44			0.515932																							0.584375					0.469925											0.394135
3.46			0.516081																							0.5733					0.46726											0.415862
3.48			0.504099																							0.583509					0.482215											0.432452
3.5			0.513266																							0.592921					0.477432											0.402601
3.52			0.529653																							0.595905					0.478193											0.408317
3.54			0.546927																							0.587835					0.479306											0.404841
3.56			0.517552																							0.595252					0.475784											0.421204
3.58			0.508297																							0.587625					0.477145											0.412986
3.6			0.517644																							0.586698					0.482444											0.406228
3.62			0.517943																							0.584884					0.485107											0.418285
3.64			0.540726																							0.591529					0.473845											0.425657
3.66			0.560304																							0.591835					0.469071											0.392339
3.68			0.516219																							0.58125					0.466879											0.430664
3.7			0.5438																							0.591305					0.475236											0.419344
3.72			0.542839																							0.598681					0.474229											0.418572
3.74			0.491511																							0.603626					0.475519											0.411572
3.76			0.526368																							0.591507					0.475942											0.374578
3.78			0.573591																							0.598618					0.477948											0.426499
3.8			0.530132																							0.590655					0.477702											0.398762
3.82			0.53026																							0.605624					0.483328											0.397617
3.84			0.523824																							0.59372					0.478792											0.390507
3.86			0.576522																							0.604518					0.478859											0.41257
3.88			0.56361																							0.590376					0.476041											0.38106
3.9			0.552401																							0.592812					0.482836											0.392973
3.92			0.567691																							0.587612					0.491136											0.42425
3.94			0.551283																							0.593261					0.482638											0.413163
3.96			0.555427																							0.587022					0.474803											0.42483
3.98			0.539616																							0.586288					0.490184											0.381711
4			0.55534																							0.595702					0.474323											0.426825
4.02			0.568199																							0.595696					0.472724											0.387969
4.04			0.542334																							0.588626					0.47843											0.399116
4.06			0.585024																							0.589036					0.484954											0.401111
4.08			0.588912																							0.600379					0.483812											0.408264
4.1			0.592855																							0.597776					0.474773											0.414589
4.12			0.560114																							0.60242					0.491612											0.40688
4.14			0.574211																							0.609814					0.479913											0.4315
4.16			0.551943																							0.596765					0.492077											0.434684
4.18			0.567151																							0.608386					0.476606											0.412047
4.2			0.551035																							0.611861					0.493747											0.437775
4.22			0.503702																							0.611519					0.483297											0.435864
4.24			0.45509																							0.608846					0.492404											0.420659
4.26			0.468054																							0.608882					0.459262											0.419934
4.28																										0.606139					0.476517											0.435253
4.3																										0.599659					0.472687											0.404983
4.32																										0.617167					0.489461											0.444904
4.34																										0.616463					0.487229											0.432211
4.36																										0.601366					0.481091											0.432937
4.38																										0.612557					0.475346											0.416317
4.4																										0.612343					0.476589											0.440701
4.42																										0.613794					0.478651											0.423942
4.44																										0.60409					0.4874											0.443452
4.46																										0.601652					0.492168											0.405121
4.48																										0.602314					0.480369											0.46103
4.5																										0.607022					0.482288											0.414461
4.52																										0.599234					0.488651											0.406853
4.54																										0.608085					0.487389											0.432652
4.56																										0.605946					0.492737											0.464693
4.58																										0.609499					0.483588											0.445182
4.6																										0.611061					0.489888											0.445958
4.62																										0.635956					0.500367											0.437821
4.64																										0.618745					0.494876											0.403927
4.66																										0.619339					0.5035											0.468815
4.68																										0.62287					0.498972											0.441821
4.7																										0.623494					0.502655											0.436934
4.72																										0.618849					0.504398											0.45106
4.74																										0.618867					0.495446											0.443099
4.76																										0.623428					0.503283											0.461369
4.78																										0.626946					0.501944											0.406439
4.8																										0.634459					0.506788											0.425125
4.82																										0.6426					0.50369											0.438677
4.84																										0.616375					0.494979											0.431803
4.86																										0.636883					0.500047											0.46926
4.88																										0.62139					0.512868											0.45738
4.9																										0.608544					0.50194											0.444668
4.92																										0.569068					0.500732											0.456878
4.94																										0.453827					0.501353											0.461675
4.96																															0.508166											0.437036
4.98																															0.501864											0.422851
5																															0.513951											0.469325
5.02																															0.506933											0.460245
5.04																															0.51256											0.447397
5.06																															0.506566											0.467119
5.08																															0.514073											0.451463
5.1																															0.515915											0.490756
5.12																															0.50871											0.474496
5.14																															0.509675											0.437251
5.16																															0.504425											0.451087
5.18																															0.518314											0.478835
5.2																															0.524747											0.481523
5.22																															0.51793											0.466185
5.24																															0.507697											0.46005
5.26																															0.503919											0.474023
5.28																															0.506398											0.43605
5.3																															0.503076											0.485904
5.32																															0.511585											0.45663
5.34																															0.525341											0.459947
5.36																															0.508838											0.482336
5.38																															0.520191											0.471825
5.4																															0.509006											0.451714
5.42																															0.511348											0.489885
5.44																															0.513233											0.461624
5.46																															0.512577											0.473752
5.48																															0.510959											0.438806
5.5																															0.516576											0.469842
5.52																															0.50781											0.450861
5.54																															0.511106											0.454292
5.56																															0.493972											0.455717
5.58																															0.5069											0.490113
5.6																															0.50606											0.482889
5.62																															0.502697											0.465368
5.64																															0.502665											0.481672
5.66																															0.519319											0.44464
5.68																															0.504944											0.480832
5.7																															0.516812											0.489825
5.72																															0.50482											0.482549
5.74																															0.516116											0.469863
5.76																															0.508178											0.471881
5.78																															0.510461											0.452243
5.8																															0.51746											0.471747
5.82																															0.512304											0.504108
5.84																															0.508468											0.477898
5.86																															0.495363											0.469938
5.88																															0.514396											0.456407
5.9																															0.512444											0.459475
5.92																															0.511918											0.509853
5.94																															0.508703											0.448671
5.96																															0.521228											0.463496
5.98																															0.50684											0.451694
6																															0.499616											0.47365
6.02																															0.501739											0.465777
6.04																															0.519144											0.512111
6.06																															0.511028											0.482688
6.08																															0.507379											0.481018
6.1																															0.499358											0.505985
6.12																															0.509305											0.472862
6.14																															0.503286											0.469795
6.16																															0.507818											0.491802
6.18																															0.512426											0.487891
6.2																															0.510259											0.454378
6.22																															0.522887											0.47178
6.24																															0.506908											0.486613
6.26																															0.519601											0.490835
6.28																															0.506414											0.490228
6.3																															0.510014											0.498167
6.32																															0.523378											0.49267
6.34																															0.504329											0.473246
6.36																															0.507318											0.47145
6.38																															0.521713											0.491936
6.4																															0.514989											0.479013
6.42																															0.51472											0.466529
6.44																															0.502143											0.496144
6.46																															0.508193											0.469536
6.48																															0.510771											0.474692
6.5																															0.52028											0.488596
6.52																															0.510247											0.473036
6.54																															0.497035											0.489509
6.56																															0.521099											0.476216
6.58																															0.507504											0.45955
6.6																															0.508056											0.469583
6.62																															0.505581											0.465561
6.64																															0.512967											0.495483
6.66																															0.519745											0.474328
6.68																															0.516603											0.475609
6.7																															0.51553											0.467535
6.72																															0.513527											0.492931
6.74																															0.522058											0.487344
6.76																															0.5043											0.483698
6.78																															0.520684											0.490362
6.8																															0.500703											0.475644
6.82																															0.502932											0.494444
6.84																															0.509969											0.503983
6.86																															0.512932											0.48422
6.88																															0.504794											0.50833
6.9																															0.512894											0.488254
6.92																															0.506583											0.499127
6.94																															0.49782											0.484178
6.96																															0.503038											0.502984
6.98																															0.509561											0.505692
7																															0.522894											0.471076
7.02																															0.527121											0.469382
7.04																															0.510498											0.479364
7.06																															0.516403											0.493165
7.08																															0.516542											0.464567
7.1																															0.514848											0.485857
7.12																															0.513707											0.481093
7.14																															0.510976											0.474903
7.16																															0.514877											0.477999
7.18																															0.508856											0.482031
7.2																															0.518314											0.469885
7.22																															0.516628											0.476133
7.24																															0.516496											0.49347
7.26																															0.523675											0.476238
7.28																															0.50654											0.479396
7.3																															0.529177											0.495519
7.32																															0.514159											0.486793
7.34																															0.514094											0.470067
7.36																															0.508734											0.484966
7.38																															0.513192											0.51547
7.4																															0.523809											0.476966
7.42																															0.51653											0.497506
7.44																															0.517655											0.472316
7.46																															0.516301											0.487786
7.48																															0.510668											0.511074
7.5																															0.507566											0.474668
7.52																															0.527463											0.493699
7.54																															0.509006											0.497283
7.56																															0.515954											0.475093
7.58																															0.50075											0.501271
7.6																															0.509178											0.492301
7.62																															0.514427											0.496454
7.64																															0.519322											0.491923
7.66																															0.522598											0.492157
7.68																															0.508916											0.477468
7.7																															0.519225											0.492658
7.72																															0.520451											0.500141
7.74																															0.510835											0.477505
7.76																															0.516436											0.498308
7.78																															0.505924											0.486986
7.8																															0.5253											0.509413
7.82																															0.52291											0.500849
7.84																															0.525875											0.499252
7.86																															0.517503											0.487578
7.88																															0.526449											0.460008
7.9																															0.527355											0.518851
7.92																															0.516856											0.498614
7.94																															0.521526											0.514348
7.96																															0.513245											0.523956
7.98																															0.517141											0.517128
8																															0.502109											0.48985
8.02																															0.514119											0.501355
8.04																															0.527797											0.485921
8.06																															0.519536											0.50219
8.08																															0.514184											0.509702
8.1																															0.511481											0.499822
8.12																															0.521311											0.525208
8.14																															0.527181											0.48777
8.16																															0.510942											0.503631
8.18																															0.508549											0.493621
8.2																															0.520583											0.523214
8.22																															0.513177											0.50936
8.24																															0.522405											0.501818
8.26																															0.524756											0.510079
8.28																															0.525203											0.489974
8.3																															0.516966											0.50601
8.32																															0.519155											0.495123
8.34																															0.52526											0.489943
8.36																															0.513145											0.507508
8.38																															0.519018											0.513533
8.4																															0.509605											0.511004
8.42																															0.520022											0.530661
8.44																															0.521351											0.489126
8.46																															0.518855											0.489351
8.48																															0.523309											0.51931
8.5																															0.513833											0.511973
8.52																															0.511056											0.51802
8.54																															0.512285											0.508712
8.56																															0.517438											0.520357
8.58																															0.513625											0.50365
8.6																															0.527459											0.512347
8.62																															0.513757											0.500794
8.64																															0.520046											0.515736
8.66																															0.518318											0.507038
8.68																															0.522358											0.533247
8.7																															0.514092											0.529562
8.72																															0.512159											0.516358
8.74																															0.526671											0.510287
8.76																															0.522679											0.52316
8.78																															0.517978											0.501083
8.8																															0.540265											0.504992
8.82																															0.505401											0.492477
8.84																															0.524051											0.480035
8.86																															0.527558											0.426119
8.88																															0.519088											0.459056
8.9																															0.523893											0.256807
8.92																															0.52498
8.94																															0.53198
8.96																															0.524713
8.98																															0.524574
9																															0.51979
9.02																															0.53158
9.04																															0.521825
9.06																															0.535441
9.08																															0.522477
9.1																															0.53383
9.12																															0.52906
9.14																															0.527005
9.16																															0.536925
9.18																															0.527592
9.2																															0.53324
9.22																															0.524776
9.24																															0.531286
9.26																															0.531238
9.28																															0.518606
9.3																															0.524547
9.32																															0.536354
9.34																															0.530207
9.36																															0.52841
9.38																															0.524948
9.4																															0.534234
9.42																															0.52651
9.44																															0.53291
9.46																															0.528516
9.48																															0.541279
9.5																															0.519884
9.52																															0.531099
9.54																															0.528009
9.56																															0.534053
9.58																															0.532294
9.6																															0.537198
9.62																															0.550597
9.64																															0.531063
9.66																															0.516505
9.68																															0.533344
9.7																															0.534371
9.72																															0.541531
9.74																															0.533626
9.76																															0.534937
9.78																															0.531756
9.8																															0.539262
9.82																															0.535105
9.84																															0.542502
9.86																															0.542775
9.88																															0.535883
9.9																															0.533765
9.92																															0.536907
9.94																															0.55156
9.96																															0.534
9.98																															0.538041
10																															0.53806
10.02																															0.537801
10.04																															0.543667
10.06																															0.538151
10.08																															0.548159
10.1																															0.539485
10.12																															0.545228
10.14																															0.528402
10.16																															0.533669
10.18																															0.53314
10.2																															0.551906
10.22																															0.545216
10.24																															0.547669
10.26																															0.550956
10.28																															0.549282
10.3																															0.545482
10.32																															0.550405
10.34																															0.535999
10.36																															0.525947
10.38																															0.550254
10.4																															0.547993
10.42																															0.542854
10.44																															0.53299
10.46																															0.542721
10.48																															0.539431
10.5																															0.534505
10.52																															0.540858
10.54																															0.555884
10.56																															0.545428
10.58																															0.547363
10.6																															0.53776
10.62																															0.549589
10.64																															0.544743
10.66																															0.543016
10.68																															0.542166
10.7																															0.544296
10.72																															0.546691
10.74																															0.556595
10.76																															0.542283
10.78																															0.556304
10.8																															0.533315
10.82																															0.553821
10.84																															0.549234
10.86																															0.54215
10.88																															0.547183
10.9																															0.552817
10.92																															0.555606
10.94																															0.551504
10.96																															0.550718
10.98																															0.549214
11																															0.54309
11.02																															0.547439
11.04																															0.556668
11.06																															0.544932
11.08																															0.550049
11.1																															0.550796
11.12																															0.544171
11.14																															0.541253
11.16																															0.550415
11.18																															0.545705
11.2																															0.547308
11.22																															0.55001
11.24																															0.544803
11.26																															0.568031
11.28																															0.533957
11.3																															0.563584
11.32																															0.561818
11.34																															0.549311
11.36																															0.544521
11.38																															0.539249
11.4																															0.546752
11.42																															0.556688
11.44																															0.555263
11.46																															0.545511
11.48																															0.549373
11.5																															0.547062
11.52																															0.556888
11.54																															0.556625
11.56																															0.535465
11.58																															0.557259
11.6																															0.559904
11.62																															0.554766
11.64																															0.557322
11.66																															0.551022
11.68																															0.547751
11.7																															0.562294
11.72																															0.559219
11.74																															0.554138
11.76																															0.551389
11.78																															0.565039
11.8																															0.561833
11.82																															0.569414
11.84																															0.552964
11.86																															0.554326
11.88																															0.555752
11.9																															0.568293
11.92																															0.536941
11.94																															0.577049
11.96																															0.570751
11.98																															0.566784
12																															0.561814
12.02																															0.557879
12.04																															0.54916
12.06																															0.560144
12.08																															0.564173
12.1																															0.566844
12.12																															0.550709
12.14																															0.555404
12.16																															0.561516
12.18																															0.55595
12.2																															0.565256
12.22																															0.549475
12.24																															0.555926
12.26																															0.55777
12.28																															0.564998
12.3																															0.567624
12.32																															0.568442
12.34																															0.550193
12.36																															0.564608
12.38																															0.562746
12.4																															0.554833
12.42																															0.556682
12.44																															0.565795
12.46																															0.559518
12.48																															0.564194
12.5																															0.565622
12.52																															0.57501
12.54																															0.566822
12.56																															0.5663
12.58																															0.562554
12.6																															0.562489
12.62																															0.566771
12.64																															0.555137
12.66																															0.5718
12.68																															0.567527
12.7																															0.564543
12.72																															0.554676
12.74																															0.552031
12.76																															0.570679
12.78																															0.554614
12.8																															0.570103
12.82																															0.568863
12.84																															0.576857
12.86																															0.57326
12.88																															0.572076
12.9																															0.565617
12.92																															0.561334
12.94																															0.576049
12.96																															0.5632
12.98																															0.571732
13																															0.570479
13.02																															0.560956
13.04																															0.559321
13.06																															0.565316
13.08																															0.564262
13.1																															0.57289
13.12																															0.56361
13.14																															0.563449
13.16																															0.559405
13.18																															0.568196
13.2																															0.566494
13.22																															0.561285
13.24																															0.569894
13.26																															0.56915
13.28																															0.574093
13.3																															0.575264
13.32																															0.564575
13.34																															0.552076
13.36																															0.563741
13.38																															0.576269
13.4																															0.562215
13.42																															0.573011
13.44																															0.548167
13.46																															0.559149
13.48																															0.559887
13.5																															0.556396
13.52																															0.565238
13.54																															0.576344
13.56																															0.569031
13.58																															0.580172
13.6																															0.571422
13.62																															0.574232
13.64																															0.568738
13.66																															0.578051
13.68																															0.572999
13.7																															0.569822
13.72																															0.559235
13.74																															0.569122
13.76																															0.590237
13.78																															0.575074
13.8																															0.571603
13.82																															0.567759
13.84																															0.577068
13.86																															0.578851
13.88																															0.5689
13.9																															0.579662
13.92																															0.574032
13.94																															0.576009
13.96																															0.572105
13.98																															0.585244
14																															0.576034
14.02																															0.575475
14.04																															0.588635
14.06																															0.574158
14.08																															0.56778
14.1																															0.578025
14.12																															0.585745
14.14																															0.550458
14.16																															0.578692
14.18																															0.577985
14.2																															0.567146
14.22																															0.57372
14.24																															0.582009
14.26																															0.570811
14.28																															0.576178
14.3																															0.583534
14.32																															0.589144
14.34																															0.57447
14.36																															0.582589
14.38																															0.584515
14.4																															0.585673
14.42																															0.576813
14.44																															0.576044
14.46																															0.581152
14.48																															0.576516
14.5																															0.583797
14.52																															0.586708
14.54																															0.568576
14.56																															0.574739
14.58																															0.574121
14.6																															0.575998
14.62																															0.585773
14.64																															0.583387
14.66																															0.58055
14.68																															0.572822
14.7																															0.588219
14.72																															0.57345
14.74																															0.581104
14.76																															0.58421
14.78																															0.587065
14.8																															0.593275
14.82																															0.597217
14.84																															0.577523
14.86																															0.599622
14.88																															0.581018
14.9																															0.588769
14.92																															0.582008
14.94																															0.595796
14.96																															0.576571
14.98																															0.599167
15																															0.591085
15.02																															0.581138
15.04																															0.589982
15.06																															0.600903
15.08																															0.600257
15.1																															0.594342
15.12																															0.583727
15.14																															0.58817
15.16																															0.58712
15.18																															0.58269
15.2																															0.576454
15.22																															0.5957
15.24																															0.592002
15.26																															0.582313
15.28																															0.579457
15.3																															0.590987
15.32																															0.586359
15.34																															0.578059
15.36																															0.5867
15.38																															0.589412
15.4																															0.58558
15.42																															0.582318
15.44																															0.582898
15.46																															0.599304
15.48																															0.589674
15.5																															0.583197
15.52																															0.593532
15.54																															0.586158
15.56																															0.584345
15.58																															0.583607
15.6																															0.598333
15.62																															0.577968
15.64																															0.587066
15.66																															0.592287
15.68																															0.587227
15.7																															0.600375
15.72																															0.584425
15.74																															0.599561
15.76																															0.599968
15.78																															0.589668
15.8																															0.5947
15.82																															0.595423
15.84																															0.581266
15.86																															0.592136
15.88																															0.5876
15.9																															0.592047
15.92																															0.590132
15.94																															0.601203
15.96																															0.580859
15.98																															0.604558
16																															0.591506
16.02																															0.577638
16.04																															0.593334
16.06																															0.605721
16.08																															0.596676
16.1																															0.592635
16.12																															0.601092
16.14																															0.597989
16.16																															0.589025
16.18																															0.58513
16.2																															0.609947
16.22																															0.604878
16.24																															0.598295
16.26																															0.603613
16.28																															0.586086
16.3																															0.594762
16.32																															0.593241
16.34																															0.601816
16.36																															0.59551
16.38																															0.592377
16.4																															0.599404
16.42																															0.600145
16.44																															0.598485
16.46																															0.598662
16.48																															0.597098
16.5																															0.592661
16.52																															0.596193
16.54																															0.59623
16.56																															0.596754
16.58																															0.602939
16.6																															0.594004
16.62																															0.585283
16.64																															0.598613
16.66																															0.603535
16.68																															0.593747
16.7																															0.608681
16.72																															0.598183
16.74																															0.602571
16.76																															0.596682
16.78																															0.596788
16.8																															0.602336
16.82																															0.597285
16.84																															0.603042
16.86																															0.590061
16.88																															0.603712
16.9																															0.599216
16.92																															0.594342
16.94																															0.612062
16.96																															0.605434
16.98																															0.599679
17																															0.602129
17.02																															0.600194
17.04																															0.600429
17.06																															0.602083
17.08																															0.607325
17.1																															0.600909
17.12																															0.612314
17.14																															0.59281
17.16																															0.607689
17.18																															0.61345
17.2																															0.603688
17.22																															0.607418
17.24																															0.595299
17.26																															0.612518
17.28																															0.595554
17.3																															0.601041
17.32																															0.592186
17.34																															0.605631
17.36																															0.59928
17.38																															0.604548
17.4																															0.598049
17.42																															0.604473
17.44																															0.5982
17.46																															0.609468
17.48																															0.594911
17.5																															0.617768
17.52																															0.60486
17.54																															0.605781
17.56																															0.602683
17.58																															0.596871
17.6																															0.608262
17.62																															0.594525
17.64																															0.583562
17.66																															0.59577
17.68																															0.607807
17.7																															0.607104
17.72																															0.59667
17.74																															0.595629
17.76																															0.600528
17.78																															0.589814
17.8																															0.602136
17.82																															0.593494
17.84																															0.596406
17.86																															0.595418
17.88																															0.59749
17.9																															0.606391
17.92																															0.607045
17.94																															0.593133
17.96																															0.595651
17.98																															0.60497
18																															0.594195
18.02																															0.604657
18.04																															0.596065
18.06																															0.611413
18.08																															0.613164
18.1																															0.598759
18.12																															0.597316
18.14																															0.603798
18.16																															0.608029
18.18																															0.60466
18.2																															0.610124
18.22																															0.593195
18.24																															0.585454
18.26																															0.593388
18.28																															0.589695
18.3																															0.598998
18.32																															0.585586
18.34																															0.603501
18.36																															0.596162
18.38																															0.598221
18.4																															0.601268
18.42																															0.593212
18.44																															0.5957
18.46																															0.599619
18.48																															0.600917
18.5																															0.595235
18.52																															0.598626
18.54																															0.601715
18.56																															0.591519
18.58																															0.603146
18.6																															0.605047
18.62																															0.613516
18.64																															0.593051
18.66																															0.603646
18.68																															0.58359
18.7																															0.596224
18.72																															0.598661
18.74																															0.600671
18.76																															0.597609
18.78																															0.592573
18.8																															0.59959
18.82																															0.599674
18.84																															0.602389
18.86																															0.594926
18.88																															0.595626
18.9																															0.588182
18.92																															0.602608
18.94																															0.604863
18.96																															0.611238
18.98																															0.596283
19																															0.597602
19.02																															0.600197
19.04																															0.599999
19.06																															0.607852
19.08																															0.594528
19.1																															0.602152
19.12																															0.587865
19.14																															0.592627
19.16																															0.596526
19.18																															0.603218
19.2																															0.59112
19.22																															0.605935
19.24																															0.594346
19.26																															0.604525
19.28																															0.602614
19.3																															0.606965
19.32																															0.606007
19.34																															0.603052
19.36																															0.609224
19.38																															0.608397
19.4																															0.608029
19.42																															0.615952
19.44																															0.602542
19.46																															0.595716
19.48																															0.610431
19.5																															0.60326
19.52																															0.609065
19.54																															0.613238
19.56																															0.598922
19.58																															0.597801
19.6																															0.594971
19.62																															0.601047
19.64																															0.595121
19.66																															0.603537
19.68																															0.600185
19.7																															0.597571
19.72																															0.613111
19.74																															0.607027
19.76																															0.595411
19.78																															0.605693
19.8																															0.610732
19.82																															0.607842
19.84																															0.606717
19.86																															0.606081
19.88																															0.615142
19.9																															0.614933
19.92																															0.600541
19.94																															0.601637
19.96																															0.611626
19.98																															0.595971
20																															0.60958
20.02																															0.608711
20.04																															0.595589
20.06																															0.599312
20.08																															0.603332
20.1																															0.603527
20.12																															0.598729
20.14																															0.609476
20.16																															0.611505
20.18																															0.610999
20.2																															0.616332
20.22																															0.605736
20.24																															0.588427
20.26																															0.606966
20.28																															0.609083
20.3																															0.605491
20.32																															0.601659
20.34																															0.598997
20.36																															0.599642
20.38																															0.594672
20.4																															0.605572
20.42																															0.617531
20.44																															0.616841
20.46																															0.605008
20.48																															0.611522
20.5																															0.619695
20.52																															0.606873
20.54																															0.610929
20.56																															0.608299
20.58																															0.605972
20.6																															0.608158
20.62																															0.623768
20.64																															0.590665
20.66																															0.622439
20.68																															0.619709
20.7																															0.615664
20.72																															0.596506
20.74																															0.616316
20.76																															0.611464
20.78																															0.613876
20.8																															0.601141
20.82																															0.624179
20.84																															0.611701
20.86																															0.61299
20.88																															0.612128
20.9																															0.628239
20.92																															0.616259
20.94																															0.627433
20.96																															0.612191
20.98																															0.613677
21																															0.627313
21.02																															0.604104
21.04																															0.613437
21.06																															0.619588
21.08																															0.624659
21.1																															0.623663
21.12																															0.611166
21.14																															0.618073
21.16																															0.602665
21.18																															0.613313
21.2																															0.60736
21.22																															0.620112
21.24																															0.62764
21.26																															0.620356
21.28																															0.632023
21.3																															0.616785
21.32																															0.634022
21.34																															0.627407
21.36																															0.611757
21.38																															0.611393
21.4																															0.627704
21.42																															0.617223
21.44																															0.614217
21.46																															0.610443
21.48																															0.63174
21.5																															0.611661
21.52																															0.61798
21.54																															0.626664
21.56																															0.611031
21.58																															0.613586
21.6																															0.621369
21.62																															0.628057
21.64																															0.630145
21.66																															0.62851
21.68																															0.616822
21.7																															0.617304
21.72																															0.619345
21.74																															0.630837
21.76																															0.619777
21.78																															0.623534
21.8																															0.640113
21.82																															0.61515
21.84																															0.619958
21.86																															0.635573
21.88																															0.624622
21.9																															0.631604
21.92																															0.633662
21.94																															0.619885
21.96																															0.628477
21.98																															0.628455
22																															0.618443
22.02																															0.634129
22.04																															0.635863
22.06																															0.619607
22.08																															0.634266
22.1																															0.633128
22.12																															0.633006
22.14																															0.625522
22.16																															0.633573
22.18																															0.641264
22.2																															0.618281
22.22																															0.620099
22.24																															0.629303
22.26																															0.633243
22.28																															0.625514
22.3																															0.621128
22.32																															0.625694
22.34																															0.629428
22.36																															0.623308
22.38																															0.628439
22.4																															0.623037
22.42																															0.632454
22.44																															0.639342
22.46																															0.639555
22.48																															0.623447
22.5																															0.632388
22.52																															0.628708
22.54																															0.637097
22.56																															0.632905
22.58																															0.643984
22.6																															0.630297
22.62																															0.630775
22.64																															0.632279
22.66																															0.633224
22.68																															0.647266
22.7																															0.632731
22.72																															0.630305
22.74																															0.636828
22.76																															0.633833
22.78																															0.629078
22.8																															0.643133
22.82																															0.634168
22.84																															0.651527
22.86																															0.640854
22.88																															0.635268
22.9																															0.642609
22.92																															0.634148
22.94																															0.634711
22.96																															0.636034
22.98																															0.636447
23																															0.629642
23.02																															0.637894
23.04																															0.627414
23.06																															0.649159
23.08																															0.635796
23.1																															0.641408
23.12																															0.635865
23.14																															0.641987
23.16																															0.639689
23.18																															0.625196
23.2																															0.63433
23.22																															0.639402
23.24																															0.647104
23.26																															0.651041
23.28																															0.632027
23.3																															0.647449
23.32																															0.639246
23.34																															0.635772
23.36																															0.633516
23.38																															0.633265
23.4																															0.63256
23.42																															0.653844
23.44																															0.642571
23.46																															0.646941
23.48																															0.624669
23.5																															0.628996
23.52																															0.637992
23.54																															0.636738
23.56																															0.642835
23.58																															0.639128
23.6																															0.638847
23.62																															0.638905
23.64																															0.64809
23.66																															0.64325
23.68																															0.65232
23.7																															0.649511
23.72																															0.642987
23.74																															0.66193
23.76																															0.647107
23.78																															0.646741
23.8																															0.647272
23.82																															0.641824
23.84																															0.641905
23.86																															0.647682
23.88																															0.647334
23.9																															0.646497
23.92																															0.649415
23.94																															0.661429
23.96																															0.642991
23.98																															0.650643
24																															0.655739
24.02																															0.644212
24.04																															0.647423
24.06																															0.646804
24.08																															0.652268
24.1																															0.651188
24.12																															0.642002
24.14																															0.652093
24.16																															0.649903
24.18																															0.661002
24.2																															0.650217
24.22																															0.649187
24.24																															0.649529
24.26																															0.646143
24.28																															0.658877
24.3																															0.661628
24.32																															0.650693
24.34																															0.655331
24.36																															0.657203
24.38																															0.643881
24.4																															0.642214
24.42																															0.648395
24.44																															0.651374
24.46																															0.646221
24.48																															0.646128
24.5																															0.644305
24.52																															0.655349
24.54																															0.652545
24.56																															0.658906
24.58																															0.64539
24.6																															0.659132
24.62																															0.661191
24.64																															0.651349
24.66																															0.654001
24.68																															0.644865
24.7																															0.664436
24.72																															0.652403
24.74																															0.656997
24.76																															0.662228
24.78																															0.656408
24.8																															0.636159
24.82																															0.651321
24.84																															0.656687
24.86																															0.654038
24.88																															0.655903
24.9																															0.650401
24.92																															0.648209
24.94																															0.648393
24.96																															0.65083
24.98																															0.660905
25																															0.654049
25.02																															0.652496
25.04																															0.649529
25.06																															0.648091
25.08																															0.644413
25.1																															0.646458
25.12																															0.654902
25.14																															0.652614
25.16																															0.645878
25.18																															0.6649
25.2																															0.662881
25.22																															0.657331
25.24																															0.656642
25.26																															0.649136
25.28																															0.654532
25.3																															0.651339
25.32																															0.658882
25.34																															0.653128
25.36																															0.656737
25.38																															0.663275
25.4																															0.656107
25.42																															0.652646
25.44																															0.647375
25.46																															0.666276
25.48																															0.656579
25.5																															0.667301
25.52																															0.661379
25.54																															0.656242
25.56																															0.656899
25.58																															0.648235
25.6																															0.656258
25.62																															0.661063
25.64																															0.657492
25.66																															0.658817
25.68																															0.667123
25.7																															0.655465
25.72																															0.66222
25.74																															0.639746
25.76																															0.656441
25.78																															0.652718
25.8																															0.666171
25.82																															0.652456
25.84																															0.650666
25.86																															0.660547
25.88																															0.657861
25.9																															0.646613
25.92																															0.651517
25.94																															0.649772
25.96																															0.656764
25.98																															0.658183
26																															0.655613
26.02																															0.6562
26.04																															0.655342
26.06																															0.666508
26.08																															0.65087
26.1																															0.650743
26.12																															0.637817
26.14																															0.650123
26.16																															0.652048
26.18																															0.651435
26.2																															0.658725
26.22																															0.652202
26.24																															0.651517
26.26																															0.662555
26.28																															0.659294
26.3																															0.654518
26.32																															0.651275
26.34																															0.653187
26.36																															0.658591
26.38																															0.662157
26.4																															0.65338
26.42																															0.645655
26.44																															0.6478
26.46																															0.652821
26.48																															0.64784
26.5																															0.659693
26.52																															0.64259
26.54																															0.656282
26.56																															0.659208
26.58																															0.655188
26.6																															0.655096
26.62																															0.660936
26.64																															0.653993
26.66																															0.651821
26.68																															0.661633
26.7																															0.656934
26.72																															0.657018
26.74																															0.649556
26.76																															0.659333
26.78																															0.657457
26.8																															0.654237
26.82																															0.659349
26.84																															0.652798
26.86																															0.658828
26.88																															0.664898
26.9																															0.643842
26.92																															0.655278
26.94																															0.646872
26.96																															0.644134
26.98																															0.64588
27																															0.662656
27.02																															0.647844
27.04																															0.651343
27.06																															0.657134
27.08																															0.650436
27.1																															0.650083
27.12																															0.650543
27.14																															0.651539
27.16																															0.646899
27.18																															0.660299
27.2																															0.653359
27.22																															0.644301
27.24																															0.646872
27.26																															0.648438
27.28																															0.637712
27.3																															0.648365
27.32																															0.632139
27.34																															0.631047
27.36																															0.650178
27.38																															0.631188
27.4																															0.624964
27.42																															0.634057
27.44																															0.647606
27.46																															0.63912
27.48																															0.629354
27.5																															0.614701
27.52																															0.614908
27.54																															0.607776
27.56																															0.598508
27.58																															0.549067

## Sheet: MDAs
time	Deformation Major
	211020s1t1	211020s1t4	211020s1t5	211020s1t7	211020s1t10	211020s1t14	211020s2t1	211020s2t5	211020s5t1	211020s5t2	211020s5t3	211020s5t8	211020s5t9	211021s1t2	211021s2t2	211021s3t2	211021s3t5	211021s3t9	211021s3t17	211021s3t18	211021s3t19	211201s1t2	211201s1t3	211201s1t4	211201s1t11	211201s1t12	211201s2t4	211201s3t1	211201s4t3	211201s4t5	211201s4t6
0.02	0.110982	-0.0566521	0.143604		0.216662	0.223989	0.178529		0.255504	0.0307828	0.10776	0.270092	0.219334	0.133487	0.270598	0.346723		0.142046	0.179017	0.318179	0.224434	0.197748	0.294178	0.260188	0.239784	0.181173	0.0725087	0.226105	0.286771	0.203568	0.171492
0.04	0.124462	-0.0261692	0.190844	0.229136	0.309941	0.242258	0.230899	0.182614	0.309752	0.0825046	0.178278	0.312451	0.191028	0.216325	0.318396			0.169731	0.238752	0.368884	0.267627	0.283047	0.33396	0.298922	0.288522	0.293842	0.218959	0.253651	0.315203	0.273872	0.200705
0.06	0.157163	-0.0155819	0.216367	0.297726	0.32673	0.269396	0.254957	0.177604	0.350313	0.118045	0.207094	0.327712	0.175187	0.205572	0.341968	0.302753		0.167613	0.26995	0.442636	0.287746	0.306288	0.383951	0.325007	0.297831	0.336475	0.214056	0.251988	0.325613	0.293746	0.208259
0.08	0.162743	0.00455852	0.231208	0.339186	0.392244	0.277568	0.270611	0.227692	0.344178	0.152018	0.246325	0.338255	0.248185	0.18402	0.363438	0.319527		0.154431	0.322234	0.419782	0.294493	0.31927	0.412876	0.326633	0.313459	0.340614	0.219215	0.282358	0.305204	0.308638	0.203733
0.1	0.163026	0.0354796	0.251187	0.348777	0.470537	0.295973	0.282676	0.204554	0.407332	0.161432	0.288667	0.354444	0.193288	0.226706	0.367645	0.348094		0.17376	0.337799	0.44641	0.304676	0.343467	0.445	0.35587	0.333395	0.368666	0.267369	0.297508	0.345837	0.314198	0.233539
0.12	0.15513	0.0471387	0.261947	0.366137		0.297576	0.288921	0.249732	0.451556	0.174918	0.291422	0.356409	0.28742	0.235677	0.392925	0.380823		0.209863	0.327653	0.471704	0.329617	0.355708		0.366001	0.356593	0.381972	0.2407	0.308273	0.329749	0.31259	0.215119
0.14	0.175972	0.103481	0.258532	0.375852		0.298458	0.305422	0.247238	0.455698	0.193902	0.295367	0.369856	0.282323	0.271419	0.380747	0.346698		0.197514	0.327935	0.504095	0.335691	0.365136		0.380412	0.359136	0.403995	0.265156	0.285266	0.31795	0.329032	0.216616
0.16	0.196658	0.0928463	0.283801	0.371548		0.315592	0.305759	0.249832	0.486391	0.184246	0.310189	0.363416	0.405501	0.228729	0.382829	0.33983		0.171105	0.312801	0.475835	0.32933	0.36314		0.389549	0.389188	0.412578	0.20365	0.296911	0.357726	0.33083	0.224306
0.18	0.206504	0.123639	0.286123	0.401343		0.307396	0.325585	0.257029	0.533807	0.190848	0.321404	0.356663	0.398461	0.224614	0.385953	0.338575		0.182293	0.333605	0.51559	0.35447	0.373242		0.396546	0.381385	0.415792	0.355457	0.337704	0.345325	0.350379	0.226347
0.2	0.221317	0.138372	0.287723	0.338354		0.316771	0.320937	0.272361	0.544297	0.213819	0.324824	0.38466	0.416366	0.230192	0.393807	0.34656		0.172127	0.352289	0.498584	0.352814	0.393513		0.402491	0.382124	0.421136	0.34332	0.322901	0.350627	0.359709	0.211753
0.22	0.234408	0.159847	0.292496	0.332803		0.333352	0.316224	0.260991	0.582407	0.197208	0.311479	0.383253	0.608614	0.274321	0.39872	0.391086		0.164543	0.345898	0.528269	0.369217	0.39324		0.400565	0.387921	0.440992	0.310578	0.339042	0.359756	0.367917
0.24	0.249594	0.118158	0.274652	0.404274		0.332913	0.322086	0.294963	0.599867	0.225228	0.321882	0.388756		0.25696	0.408409	0.384313		0.160268	0.353652	0.534208	0.363073	0.394361		0.423247	0.399654	0.425177	0.303838	0.334075	0.35826	0.36726	0.227489
0.26	0.273363	0.212026	0.276435	0.435999		0.327086	0.31395	0.29472	0.61073	0.203818	0.352794	0.380735		0.274242	0.432385	0.346223		0.151638	0.344213	0.517399	0.357529	0.392584		0.41409	0.409596	0.455583	0.283709	0.347279	0.364816	0.369464	0.257279
0.28	0.267325	0.163144	0.308056	0.406238		0.329869	0.316928	0.301966	0.646199	0.176502	0.342713	0.396798		0.227749	0.43095	0.341052		0.155813	0.383402	0.559603	0.376314	0.410486		0.416456	0.422791	0.466313	0.358822	0.321768	0.355545	0.387372	0.231741
0.3	0.275903	0.320669	0.31389	0.463301		0.337397	0.333641	0.302314		0.210318	0.370023	0.399547		0.22891	0.392535	0.334169		0.167932	0.363219	0.554185	0.376563	0.400039		0.429153	0.420176	0.46578	0.299131	0.355685	0.358791	0.382367	0.239944
0.32	0.284169		0.298321	0.446427		0.33662	0.331516	0.299728		0.223858	0.372709	0.38306		0.258507	0.412767	0.380747		0.127121	0.37219	0.53821	0.364192	0.396693		0.420255	0.416098	0.465281	0.333496	0.358097	0.378045	0.381846	0.217536
0.34	0.285684		0.302191	0.441465		0.345381	0.336423	0.301932		0.248692	0.355761	0.395758		0.300372	0.400181	0.347821		0.13824	0.375034	0.561681	0.385874	0.408214			0.423752	0.476102	0.325826	0.358582	0.352157	0.39817	0.242948
0.36	0.288402		0.296676	0.499793		0.356679	0.34276	0.3105		0.217599	0.360033	0.404781		0.24983	0.430271	0.420817		0.125177	0.380868	0.590498	0.37939	0.42577		0.432577	0.438883	0.473461	0.335621	0.350651	0.360841	0.390537	0.24935
0.38	0.251822		0.326694	0.451281		0.352153	0.341457	0.323798		0.216613	0.387604	0.41407		0.282501	0.434398	0.367333		0.135597	0.384204	0.568774	0.393164	0.410899		0.433925	0.443544	0.514558	0.320664	0.375998	0.350553	0.407496	0.250771
0.4	0.272298		0.338459	0.454291		0.352533	0.347514	0.317274		0.219056	0.412048	0.406705		0.281812	0.463329	0.370844		0.0554848	0.413768	0.590643	0.391398	0.416786		0.443756	0.449949	0.529331	0.334711	0.361344	0.371172	0.397533	0.234305
0.42	0.260773		0.32144	0.491102		0.359815	0.345326	0.310011		0.225615	0.401484	0.391788		0.281437	0.446848	0.363066		-0.00223907	0.396707	0.581789	0.381433	0.420093		0.4526	0.444472	0.509848	0.309608	0.375131	0.374127	0.407146	0.25237
0.44	0.25488		0.331083	0.453524		0.363632	0.346508	0.307488		0.232528	0.396837	0.407649		0.293104	0.420555	0.351142		-0.0858031	0.449697	0.584569	0.399243	0.445978		0.44422	0.448579	0.517449	0.351215	0.362374	0.34752	0.406719	0.263122
0.46	0.259549		0.313364	0.525393		0.350513	0.351098	0.331586		0.226905	0.374807	0.404298		0.253702	0.440054	0.355893			0.452496	0.622679	0.401248	0.428354		0.427561	0.470532	0.52548	0.344308	0.375515	0.291296	0.406147	0.256238
0.48	0.271672		0.345867	0.594543		0.361897	0.355719	0.312369		0.261443	0.420635	0.419884		0.255832	0.437633	0.383089			0.428874	0.581429	0.417087	0.422768		0.439759	0.47419	0.541381	0.344823	0.370407		0.411885	0.249866
0.5	0.266428		0.347591	0.493288		0.362563	0.367012	0.327251		0.254069	0.433064	0.430491		0.254762	0.45733	0.420817			0.414788		0.40951	0.433835		0.455285	0.476755	0.547392	0.308366	0.394093		0.412719	0.266351
0.52	0.284218		0.336132	0.543985		0.364298	0.361715	0.327945		0.235208	0.433106	0.422394		0.279725	0.444177	0.370995			0.438651		0.41586	0.442396		0.465381	0.476034	0.552796	0.312725	0.387908		0.426204	0.257472
0.54	0.277393		0.342647	0.508126		0.383471	0.350668	0.347749		0.237711	0.441303	0.421034		0.317081	0.449908	0.416182			0.424356		0.388628	0.439782		0.459878	0.488283		0.351426	0.383786		0.417202	0.274283
0.56	0.263083		0.345958	0.516265		0.379161	0.36862	0.3468		0.238384	0.467109	0.438209		0.287684	0.455935	0.392955			0.427495		0.426418	0.431623		0.475162	0.497168		0.357647	0.360235		0.423038	0.267436
0.58	0.294592		0.343615	0.556557		0.380836	0.349565	0.348204		0.25895	0.437866	0.439664		0.288518	0.459414	0.365751			0.439194		0.418612	0.43893		0.46974	0.474137		0.337737	0.387593		0.422609	0.281463
0.6	0.288211		0.322838	0.551009		0.375216	0.364861	0.349889		0.230603	0.450133	0.417363		0.279858	0.454457	0.360293			0.444057		0.422651	0.436354		0.480883	0.497064		0.340635	0.397007		0.423956	0.265739
0.62	0.303128		0.34715	0.552168		0.384329	0.373933	0.347236		0.279654	0.464593	0.434702		0.263698		0.346669			0.438388		0.399219	0.44898		0.487034	0.506604		0.329204	0.406686		0.423891	0.26677
0.64	0.289714		0.362988	0.605339		0.38268	0.372032	0.376923		0.268511	0.468679	0.431146		0.250301	0.459478	0.398268			0.440805		0.400161	0.444184		0.480847	0.500062		0.318835	0.389951		0.437765	0.285318
0.66	0.313509		0.349483	0.540527		0.385336	0.370434	0.356832		0.249774	0.434235	0.444901		0.250825	0.470633	0.395318			0.447519		0.405686	0.436851		0.483614	0.510609		0.319936	0.394586		0.437821	0.296631
0.68	0.294612		0.339646	0.533938		0.381543	0.380936	0.369428		0.270635	0.474262	0.445823		0.295146	0.46916	0.426657					0.393671	0.433078		0.499116	0.509063		0.342362	0.397089		0.435641	0.274457
0.7	0.307247		0.357417	0.506617		0.383251	0.382512	0.3439		0.254733	0.48886	0.447747		0.307408	0.462699	0.423712					0.423638	0.457518		0.502024	0.501155		0.332063	0.388269		0.43732	0.283874
0.72	0.2965		0.355347	0.624332		0.391278	0.381337	0.359731		0.256123	0.502577	0.442125		0.32049	0.460879	0.356841					0.411804	0.463343		0.498677	0.506206		0.315949	0.387104		0.448196	0.277516
0.74	0.307062		0.356199	0.637656		0.399849	0.383629	0.361368		0.245847	0.511225	0.441865		0.251926	0.484251	0.387899					0.437352	0.432526		0.494592	0.515401		0.356931	0.401581		0.456339	0.282661
0.76	0.321757		0.362244	0.58491		0.393436	0.38639	0.36055		0.242962	0.514558	0.436264		0.274008	0.455577	0.375128					0.42153	0.438573		0.526926	0.501536		0.360087	0.403476		0.464114	0.283068
0.78	0.306399		0.361605	0.60142		0.38546	0.392489	0.369852		0.30314	0.521684	0.449067		0.237013	0.477963	0.440937					0.415278	0.459968		0.51661	0.526963		0.337925	0.4045		0.46808	0.28095
0.8	0.301129		0.370235	0.663821		0.39005	0.391528	0.399755		0.303957	0.505569	0.457934		0.302747	0.47327	0.368842					0.431044	0.449823			0.540061		0.378116	0.414512		0.447281	0.271521
0.82	0.305588		0.380406	0.601213		0.396101	0.389444	0.412184		0.268796	0.536911	0.447148		0.311119		0.381889					0.432	0.450888			0.510956		0.329363	0.413903		0.436794	0.283903
0.84	0.310945		0.380681	0.612129		0.395584	0.389996	0.386556		0.296956	0.52074	0.460257		0.323576		0.40221					0.434717	0.447584			0.5353		0.350881	0.428057		0.458896	0.289406
0.86	0.310142		0.363449	0.651304		0.414283	0.395133	0.402989		0.263929	0.556162	0.463478		0.245211		0.370092					0.421529	0.450995			0.547673		0.335671	0.420772		0.461603	0.294836
0.88	0.314004		0.379138	0.62051		0.392136	0.40407	0.381439		0.271777	0.542663	0.468914		0.291859		0.399629					0.413234	0.4594			0.541059		0.366005	0.421185		0.44203	0.295033
0.9	0.324653		0.377259	0.572963		0.403462	0.400307	0.4058		0.29297	0.554137	0.462388		0.265158		0.383004					0.449136	0.464936			0.552578		0.370051	0.436062		0.458288	0.293284
0.92	0.324618		0.380443	0.56356		0.40873	0.398774	0.428116		0.253468	0.543045	0.479406		0.289007		0.374106					0.437871	0.457283			0.545102		0.347926	0.413578		0.439071	0.305438
0.94	0.323711		0.373843	0.6994		0.417314	0.409579	0.408531		0.287266	0.534963	0.464878		0.279447	0.483308	0.386245					0.443133	0.448517			0.558975		0.373023	0.422005		0.45492	0.28944
0.96	0.333596		0.404057	0.624229		0.401804	0.401321	0.392317		0.316723	0.56793	0.474261		0.281329		0.471459					0.451734	0.457363			0.552082		0.380376	0.425296		0.45473	0.308574
0.98	0.331504		0.372269	0.646324		0.425473	0.406378	0.41017		0.265472	0.538501	0.477611		0.315248		0.422628					0.459408	0.451226			0.564414		0.350974	0.419103		0.46687	0.301473
1	0.321277		0.402708	0.710852		0.424373	0.400711	0.415556		0.295371	0.569463	0.472182		0.273376		0.354072					0.445242	0.45628			0.57459		0.357115	0.441939		0.469204	0.290296
1.02	0.31044		0.400936	0.638854		0.424602	0.4245	0.449578		0.301697	0.535014	0.487199		0.278659		0.412433					0.437423	0.4585			0.553455		0.336238	0.429551		0.461322	0.310964
1.04	0.336752		0.40015	0.694784		0.418308	0.411206	0.439878		0.28568	0.576163	0.476903		0.272057		0.370409					0.449155	0.458182			0.551283		0.371093	0.437052		0.461377	0.294536
1.06	0.332288		0.392014	0.440673		0.423062	0.420504	0.459592		0.290034	0.590795	0.477913		0.329966		0.402235					0.431573	0.444922			0.562071		0.335278	0.43046		0.458138	0.329899
1.08	0.325306		0.380293	0.598467		0.431676	0.418593	0.441582		0.307935	0.602779	0.485325		0.277006		0.452476					0.444255	0.454466			0.546442		0.364772	0.435291		0.460711	0.317839
1.1	0.331456		0.38372	0.63703		0.434066	0.428017	0.460262		0.295165	0.599243	0.477949		0.299715		0.441434					0.445464	0.438838			0.56103		0.336919	0.424636		0.455596	0.304253
1.12	0.351557		0.393021	0.679932		0.423982	0.422676	0.490116		0.308325	0.605447	0.484902		0.323854		0.388558	0.433324				0.447643	0.420164			0.569253		0.350072	0.453591		0.451123	0.320164
1.14	0.344351		0.399359	0.69627		0.425347	0.418624	0.489482		0.289145	0.581715	0.492202		0.323619		0.370793	0.478771				0.467425	0.441951			0.556749		0.379956	0.438303		0.457724	0.310968
1.16	0.344096		0.419046	0.72457		0.446935	0.421678	0.429663		0.287463	0.618286	0.491142		0.330689		0.387191					0.462752	0.441018			0.570133		0.36229	0.445132		0.477203	0.309418
1.18	0.346118		0.416352	0.578988		0.434738	0.413359			0.310851	0.606298	0.491031		0.288946		0.393667					0.438697	0.424681			0.568304		0.368996	0.438689		0.450852	0.320172
1.2	0.34657		0.407099	0.641154		0.444501	0.432311			0.30347	0.582586	0.483274		0.272774		0.384037					0.442722	0.446124			0.563909		0.353109	0.44111		0.474506	0.319599
1.22	0.334591		0.387624	0.741788		0.440677	0.423432			0.267706	0.626334	0.524135		0.276691		0.374184	0.472963				0.482757	0.462858			0.569434		0.35505	0.44533		0.475887	0.326403
1.24	0.366588		0.418125	0.637664		0.442052	0.437363			0.295709	0.632621	0.504721		0.269015		0.390678	0.781934				0.44962	0.444508			0.568352		0.388646	0.463316		0.478007	0.328847
1.26	0.352426		0.41844	0.622387		0.451176	0.435879			0.279681	0.569513	0.500738		0.293413		0.381947					0.469957	0.46992			0.568059		0.349203	0.46194		0.476329	0.318212
1.28	0.368632		0.407582	0.71561		0.452617	0.426816			0.274678	0.642439	0.517807		0.324164		0.387166	0.551747				0.493688	0.422285			0.584573		0.351755	0.434677		0.481493	0.316311
1.3	0.356245		0.406011			0.456144	0.44177			0.305561	0.642934	0.504787		0.341843		0.346873					0.482659	0.423269			0.577597		0.356908	0.444103		0.492263	0.34131
1.32	0.346883		0.410891	0.80136		0.462528	0.442514			0.265191	0.589235	0.520346		0.297576		0.3796					0.489637	0.437567			0.59191		0.365941	0.467879		0.473828	0.340993
1.34	0.360569		0.421531	0.805335		0.449718	0.435638			0.28592	0.591298	0.516676		0.291863		0.420811	0.737123				0.484816	0.444745			0.586196		0.401662	0.444395		0.483747	0.338722
1.36	0.368405		0.425846			0.465323	0.437636			0.305715	0.630797	0.520345		0.290851		0.439489					0.470283	0.420235			0.586643		0.364171	0.461443		0.489624	0.348586
1.38	0.363886		0.419229			0.46707	0.424673			0.323049	0.580387	0.522261		0.308318		0.393382	0.467478				0.462093	0.456345			0.560186		0.369408	0.458074		0.480814	0.355436
1.4	0.372765		0.434041	0.798841		0.478733	0.41999			0.325392	0.607725	0.547703		0.274791		0.415927	0.580951				0.464587	0.434772			0.580503		0.378318	0.437398		0.49312	0.355275
1.42	0.366163		0.413301			0.468418	0.435358			0.281901	0.586878	0.559928		0.284516		0.433085	0.59182				0.478168	0.440684			0.586462		0.400937	0.465646		0.486535	0.359657
1.44	0.371764		0.419117			0.466588	0.441941			0.349933	0.704316			0.296468		0.4198	0.436406				0.457272	0.441199			0.599133		0.389711	0.468255		0.495214	0.378229
1.46	0.376907		0.428067	0.622086		0.460901	0.453013			0.328687	0.630898			0.308581		0.437943	0.669464				0.494566	0.414232			0.59075		0.380267	0.463964		0.499128	0.363828
1.48	0.364004		0.407816			0.47347	0.458112			0.328062	0.674544			0.285991		0.410655	0.623742				0.487422	0.437593			0.574104		0.390508	0.458167		0.496281	0.357307
1.5	0.374021		0.422928			0.482224	0.449058			0.305369	0.685822			0.311506		0.418687	0.497847				0.472486	0.478153			0.585887		0.401393	0.458732		0.519326	0.344147
1.52	0.375676		0.430687			0.482554	0.452182			0.303909	0.694302			0.29641		0.408581	0.657419				0.475771	0.415465			0.597575		0.380324	0.454652		0.520301	0.343743
1.54	0.379746		0.433305			0.488595	0.458136			0.291969	0.685626			0.278164		0.409277	0.509231				0.492565	0.419047			0.589188		0.436073	0.463385		0.52524
1.56	0.387535		0.430956			0.472484	0.449504			0.302526	0.672217			0.293052		0.453899					0.492557	0.46552			0.591421		0.383574	0.454163		0.516001
1.58	0.39333		0.442811			0.480237	0.44074			0.306941	0.650177			0.264803		0.455848	0.571469				0.484984	0.47293			0.602581		0.374322	0.459415		0.514928
1.6	0.381943		0.44156			0.491661	0.462066			0.329159	0.678656			0.31623		0.43841	0.491215				0.489771	0.433082			0.591822		0.389767	0.467856		0.536943
1.62	0.386307		0.423543			0.486433	0.450979			0.317579	0.662677			0.295202		0.437313	0.382868				0.49227	0.449678			0.604802		0.359679	0.452119		0.528023
1.64	0.38282		0.450512			0.484152	0.452385			0.319202	0.575666			0.343168		0.467798	0.446731				0.496318	0.448126			0.583512		0.40587	0.452142		0.536748
1.66	0.394784		0.440765			0.465161	0.45858			0.303652	0.686506			0.275797		0.48236	0.396741				0.494252	0.456319			0.605118		0.381277	0.482994		0.511358
1.68	0.402872		0.446694			0.477728	0.471724			0.320429	0.571741			0.264065		0.491747	0.586302				0.484947	0.435638			0.635096		0.37634	0.452639
1.7	0.407386		0.418234			0.495802	0.461564			0.293353	0.633412			0.288154			0.569441				0.486584	0.426692			0.613432		0.430969	0.447032
1.72	0.384643		0.450561			0.48266	0.473362			0.283602	0.691242			0.341778			0.42013				0.496749	0.443514			0.622197		0.397718	0.446843
1.74	0.398357		0.440478			0.471083	0.460905			0.330818	0.650698			0.283025							0.492775	0.44602			0.610122		0.425072	0.457912
1.76	0.411369		0.441365			0.46792	0.470864			0.31901	0.660914			0.274232			0.615728				0.496706	0.448674			0.594863		0.4099	0.456134
1.78	0.410987		0.45512			0.456859	0.460878			0.299882	0.70881			0.325143			0.491152				0.50176	0.438252			0.607558		0.403833	0.434616
1.8	0.394292		0.456041			0.498271	0.47284			0.319128	0.674189			0.253968			0.421679				0.453783	0.434942			0.599337		0.428496	0.445837
1.82	0.401401		0.450076			0.485177	0.475765			0.311344	0.65306			0.287479			0.472438				0.462515	0.453639			0.619761			0.451171
1.84	0.421612		0.437104			0.465299	0.461377			0.357223	0.671468			0.287693			0.503545					0.443486			0.613139		0.417368	0.430387
1.86	0.407186		0.475117			0.475584	0.481251			0.34742	0.686026			0.316687			0.470903					0.48463			0.610752		0.421455	0.434325
1.88	0.404263		0.467176			0.474476	0.467237			0.321744	0.639825			0.308709			0.429873					0.43085			0.607405		0.408416	0.456211
1.9	0.401756		0.441064			0.479069	0.487932			0.321062	0.637817			0.277524								0.448231			0.620355		0.407154	0.452926
1.92	0.411331		0.459361			0.48833	0.490324			0.297717	0.645733			0.353799			0.632668					0.476358			0.615728		0.419544	0.459027
1.94	0.390949		0.448789			0.488848	0.462143			0.295139	0.681122			0.267316			0.739549					0.437649			0.61854		0.421067	0.461528
1.96	0.412475		0.459877			0.474623	0.476316			0.345347	0.623939			0.275459			0.400135					0.435458			0.604402		0.391288	0.438013
1.98	0.417569		0.462448			0.486054	0.468838			0.345819	0.650643			0.279917			0.391964					0.478676			0.631297		0.415974	0.457233
2	0.420964		0.473355			0.497245	0.489909			0.30804	0.663049			0.283373			0.50961					0.445472			0.640831			0.451103
2.02	0.421382		0.455773			0.485353	0.473335			0.326417				0.334002			0.403137					0.446319			0.623849			0.462503
2.04	0.401438		0.473926			0.489379	0.493663			0.356698	0.595946			0.313158			0.39782					0.45175			0.62512			0.444173
2.06	0.421424		0.480157			0.483858	0.489785			0.361302	0.594197			0.294218			0.649554					0.433734			0.642549			0.456431
2.08	0.400961		0.477363			0.483247	0.493633			0.333889				0.290332			0.453727					0.455363			0.64916			0.451957
2.1	0.393525		0.484077			0.482817	0.488975			0.324239				0.283997			0.4886					0.475432			0.641182			0.446908
2.12	0.409844		0.473897			0.471014	0.479984			0.336303				0.307064			0.391069					0.451689			0.63693			0.458131
2.14	0.439432		0.494433			0.482779	0.481753			0.327211				0.292359			0.426327					0.470474			0.642206			0.481975
2.16	0.403292		0.483037			0.496155	0.49511			0.338699				0.269177			0.374165					0.463619			0.637308			0.473215
2.18	0.424635		0.487981			0.485319	0.481922			0.326911				0.303671			0.543723					0.442422			0.642472			0.440853
2.2	0.434287		0.477106			0.474726	0.484468			0.34011				0.299622			0.475066					0.466799			0.639535			0.45238
2.22	0.43154		0.494893			0.481774	0.493664			0.350606				0.280851			0.526409					0.472871			0.631821			0.436372
2.24	0.430564		0.487523			0.491236	0.502301			0.355884				0.303843			0.447819					0.463003			0.668291			0.436453
2.26	0.439142		0.475473			0.485753	0.501491			0.33141				0.273055			0.406813					0.475006			0.632835			0.46855
2.28	0.397901		0.49476			0.470463	0.484755			0.377315				0.254907	0.466864		0.384803					0.463847			0.629633			0.465137
2.3	0.419575		0.508838			0.477337	0.522455			0.304629				0.299282			0.417364					0.476769						0.464277
2.32	0.46452		0.469761			0.486261	0.510718			0.338865				0.285021			0.578369					0.429927						0.466056
2.34	0.440377		0.506945			0.483892	0.495929			0.323469				0.287741	0.454813		0.439608					0.426291						0.473891
2.36	0.462716		0.501178			0.491598	0.527031			0.335127				0.268723	0.489039		0.46141					0.452718						0.464509
2.38	0.433567		0.490674			0.499932	0.494413			0.317572				0.251622			0.416879					0.488028						0.454874
2.4	0.431222		0.491621			0.468338	0.531575			0.337969				0.311243			0.389002					0.474177						0.483384
2.42	0.450099		0.488592			0.477864	0.514312			0.334834				0.311674	0.485754		0.394962					0.485747						0.465374
2.44	0.442208		0.507631			0.500159	0.524808			0.331843				0.270305			0.500492					0.455298						0.483063
2.46	0.426135		0.520762			0.462872	0.529581			0.329438				0.29094	0.479545		0.406975					0.474629						0.455533
2.48	0.46665		0.508479			0.494604	0.525895			0.375664				0.268414			0.439485					0.415255						0.461542
2.5	0.433694		0.502944			0.490632	0.523381			0.366806				0.300406			0.403289											0.486739
2.52	0.430962		0.505407			0.473991	0.498338			0.388196				0.311866			0.488152											0.464101
2.54	0.447096		0.490138			0.500526	0.520812			0.349494				0.275806			0.384826											0.447937
2.56	0.453854		0.515784			0.481312	0.526169			0.399831				0.370044			0.392792											0.464604
2.58	0.452274		0.509635			0.488812	0.538299			0.386887				0.28299	0.458424		0.450888											0.470212
2.6	0.44541		0.519337			0.49973	0.516728			0.337301				0.315209	0.470559		0.739963											0.476802
2.62	0.458026		0.529957			0.494799	0.509049			0.314618				0.305784			0.430305											0.475281
2.64	0.453828		0.517995			0.477723	0.538417			0.346648				0.291897			0.430275											0.477057
2.66	0.44645		0.506041			0.508033	0.545451			0.36018				0.332009	0.450183		0.457716											0.454475
2.68	0.453472		0.51069			0.503865	0.514085			0.358161				0.291828	0.490217		0.372799											0.481022
2.7	0.454606		0.539236			0.497024	0.538294			0.40715				0.259517			0.401329											0.462721
2.72	0.462211		0.525287			0.49064	0.520689			0.304977				0.311579	0.482586		0.391375											0.489749
2.74	0.448645		0.527617			0.486326	0.543763			0.376059				0.301124			0.389441											0.48057
2.76	0.441174		0.525002			0.511807	0.527854			0.380857				0.327732			0.464533											0.499438
2.78	0.508751		0.518737			0.510834	0.530348			0.376636				0.295157			0.423588											0.471397
2.8	0.465537		0.522701			0.497602	0.545814			0.384462				0.334963	0.464981		0.573451											0.478598
2.82	0.476614		0.53436			0.482583	0.539589			0.348327				0.335505			0.399969											0.475098
2.84	0.488483		0.532479			0.490392	0.553378			0.37278				0.298179			0.394628											0.487199
2.86	0.464219		0.540486			0.490657	0.512207			0.34224				0.369567			0.439021											0.478174
2.88	0.502273		0.537082			0.483261	0.536405			0.357484				0.296306	0.475051		0.47943											0.491697
2.9	0.467675		0.54172			0.480285	0.52862			0.40134				0.326661	0.482134		0.385366											0.487123
2.92	0.505417		0.495831			0.487358	0.5564			0.328241				0.31473	0.497623		0.389304											0.461465
2.94	0.495715		0.546859			0.498518	0.543279			0.352427				0.334664			0.435933											0.471538
2.96	0.484347		0.557382			0.474312	0.555304			0.416928				0.309562	0.497513		0.44638											0.482645
2.98	0.489743		0.553204			0.498614	0.555262			0.336677				0.293354	0.481136		0.49064											0.480053
3	0.493148		0.554567			0.479676	0.565289			0.348309				0.361162	0.476544		0.467861											0.484835
3.02	0.491134		0.563639			0.492053	0.573231			0.388576				0.331298	0.461004		0.474639											0.493559
3.04	0.490928		0.549355			0.491246	0.565699			0.350067				0.309752	0.486228		0.381309											0.487244
3.06	0.489624		0.560533			0.498845	0.533172			0.356802				0.280334			0.447725											0.49316
3.08	0.491494		0.565819			0.480256	0.551726			0.341464				0.320542	0.468912		0.442683											0.503696
3.1	0.472784		0.529038			0.492445	0.546491			0.364383				0.362273	0.46888		0.386797											0.477934
3.12	0.487838		0.562099			0.499975	0.576795			0.333044				0.314278	0.478992		0.417985											0.463261
3.14	0.509639		0.573131			0.493794	0.564252			0.349429				0.313166	0.4865		0.354413											0.481296
3.16	0.515415		0.564455			0.496755	0.560759			0.333815				0.314109	0.484722		0.323586											0.48874
3.18	0.52211		0.568137			0.488514	0.557571			0.380365				0.342215			0.424103											0.478557
3.2	0.50021		0.556175			0.488761	0.570053			0.331829				0.344997			0.419943											0.509471
3.22	0.525851		0.570474			0.490372	0.568728			0.339149				0.300807			0.436934											0.497721
3.24	0.505884		0.586803			0.4983	0.535682			0.360519				0.332193	0.491446		0.356745											0.49466
3.26	0.528214		0.571414			0.494009	0.550146			0.336311				0.319219	0.481718		0.382767											0.51084
3.28	0.550899		0.582509			0.494849	0.576317			0.366326				0.309313	0.488977		0.434136											0.50494
3.3	0.569677		0.58661			0.49383	0.565513			0.362481				0.336921	0.491688		0.387183											0.483988
3.32	0.546241		0.574261			0.496581	0.564345			0.362868				0.31699			0.391114											0.493384
3.34	0.545153		0.578118			0.479946	0.549298			0.345326				0.319393			0.385981											0.518061
3.36			0.584927			0.488755	0.579495			0.30486				0.321549			0.450563											0.493408
3.38			0.612984			0.491897	0.566221			0.368647				0.293602	0.521033		0.373555											0.478094
3.4			0.585153			0.489167	0.555978			0.374497				0.315271	0.497696		0.400177											0.470002
3.42			0.580912			0.492375	0.601818			0.404772				0.311831	0.472111		0.38779											0.490945
3.44			0.599459			0.486401	0.535068			0.340957				0.279404			0.384033											0.479851
3.46			0.594884			0.48916	0.559865			0.364839				0.307562			0.385542											0.491152
3.48			0.593366			0.512197	0.598429			0.32829				0.328582			0.430924											0.500315
3.5			0.611284			0.490001	0.568193			0.408902				0.399876			0.452081											0.517151
3.52			0.594838			0.515051	0.590633			0.352687				0.34133	0.482621		0.464892											0.483851
3.54			0.608925			0.503423	0.567578			0.393538				0.322677	0.497334		0.424905											0.497408
3.56			0.563679			0.494947	0.555206			0.348247				0.39327	0.505749		0.422862											0.492241
3.58			0.61231			0.495418	0.584971			0.364067				0.321528	0.49193		0.43175											0.496173
3.6			0.590314			0.499287	0.604679			0.392186				0.319542	0.48101		0.344603											0.494432
3.62			0.598663			0.504923	0.581698			0.385259				0.335813			0.36392											0.504741
3.64			0.5718			0.483803	0.578329			0.330523				0.371083	0.479161		0.357084											0.491448
3.66						0.499604	0.591752			0.384339				0.343089			0.397511											0.481677
3.68						0.502404	0.596389			0.374315				0.352307	0.439808		0.325637											0.491418
3.7						0.50058	0.585903			0.405858				0.314085	0.481762		0.42785											0.500082
3.72						0.497945	0.588143			0.343154				0.325727	0.49832		0.405175											0.493473
3.74						0.498667	0.589292			0.37103				0.345528			0.426932											0.482149
3.76						0.504289	0.607092			0.365359				0.330682	0.494854		0.403423											0.490383
3.78						0.512003	0.587614			0.363473				0.307806	0.491074		0.35467											0.503214
3.8						0.488026	0.631704			0.403981				0.38225	0.505994		0.337176											0.492356
3.82						0.509703	0.596134			0.358887				0.323525	0.487773		0.252563											0.498072
3.84						0.482844	0.601694			0.373778				0.329652	0.504636		0.22896											0.493525
3.86						0.492989	0.616752			0.34143				0.335992	0.488509													0.494128
3.88						0.489732	0.615421			0.37518				0.334179														0.506467
3.9						0.473597	0.587893			0.418313				0.311293	0.476839													0.505514
3.92						0.5091	0.629086			0.40826				0.32155	0.476448													0.485121
3.94						0.496583	0.626204			0.364933				0.344687	0.476743													0.504794
3.96						0.505043	0.621623			0.343131				0.355185														0.486715
3.98						0.499206	0.61442			0.363167				0.359626	0.511792													0.501631
4						0.471463	0.624415			0.395523				0.385059	0.483554													0.500803
4.02						0.520638	0.632889			0.403071				0.325008	0.479279													0.504498
4.04						0.49491	0.626903			0.403271				0.293918	0.484255													0.504686
4.06						0.498009	0.623551			0.415351				0.345115	0.500121													0.511047
4.08						0.511948	0.636642			0.419176				0.373379														0.496315
4.1						0.509106	0.615901			0.44773				0.308505														0.498192
4.12						0.507591	0.626948			0.357036				0.280417	0.463779													0.490241
4.14						0.492411	0.626773			0.420302				0.307417	0.496718													0.507577
4.16						0.524224	0.629914			0.409636				0.363787	0.481635													0.49642
4.18						0.490416	0.608637			0.423801				0.31445														0.509311
4.2						0.508726	0.632098			0.450472				0.352223														0.509315
4.22						0.510498	0.624875			0.43002				0.365438														0.509441
4.24						0.498209	0.660878			0.411565				0.32787	0.510338													0.505851
4.26						0.516611	0.645011			0.432573				0.320382	0.479181													0.489679
4.28						0.503017	0.643992			0.381623				0.348698														0.496324
4.3						0.518136	0.626791			0.412664				0.380611	0.47701													0.48345
4.32						0.503654	0.63375			0.395571				0.285542	0.500144													0.490234
4.34						0.492599	0.64216			0.38966				0.316018														0.48818
4.36						0.50458	0.628858			0.415833				0.327394	0.501069													0.499925
4.38						0.50744	0.640469			0.395028				0.303058	0.497192													0.50391
4.4						0.511856	0.656004			0.4581				0.312786	0.498034													0.49626
4.42						0.524304	0.664863			0.389981				0.336135														0.517273
4.44						0.518116	0.632681			0.363101				0.267666	0.478681													0.512154
4.46						0.517297	0.649914			0.443397				0.324783	0.479899													0.50785
4.48						0.531545	0.666059			0.442181				0.32877	0.49379													0.508371
4.5						0.513408	0.652854			0.428462				0.312027														0.516191
4.52						0.522516	0.662536			0.4312				0.35061														0.513749
4.54						0.518305	0.660821			0.380243				0.314468	0.504609													0.510662
4.56						0.508429	0.669011			0.432696				0.339136	0.496914													0.512849
4.58						0.520427	0.665613			0.422781				0.329706														0.486397
4.6						0.521034	0.658256			0.459607				0.278193	0.484504													0.511496
4.62						0.524952	0.673827			0.391447				0.327672														0.534669
4.64						0.510039	0.677477			0.405631				0.304578	0.492424													0.508027
4.66						0.507759	0.683006			0.466715				0.301968	0.48721													0.498522
4.68						0.522699	0.67977			0.45916				0.317712	0.483054													0.502895
4.7						0.523626	0.672342			0.42227				0.351896	0.472332													0.515551
4.72						0.539491	0.685573			0.424475				0.342872														0.505533
4.74						0.523485	0.669272			0.380476				0.333039	0.507067													0.505795
4.76						0.501984	0.672712			0.448658				0.360175	0.499278													0.503661
4.78						0.521975	0.657518			0.47823				0.304738														0.532356
4.8						0.515019	0.692293			0.443089				0.33542	0.493561													0.504425
4.82						0.516176	0.672321			0.426348				0.328048	0.480054													0.516834
4.84						0.524871	0.696375			0.42245				0.329174	0.483801													0.52056
4.86						0.515138	0.672626			0.48105				0.365532	0.501243													0.510449
4.88						0.514203	0.667423			0.430516				0.313008	0.499474													0.507846
4.9						0.523918	0.694873			0.38113				0.348377	0.503047													0.529939
4.92						0.53057	0.704352			0.465591				0.303066	0.47996													0.519287
4.94						0.501494	0.710942			0.498711				0.332633														0.48877
4.96						0.528477	0.679496			0.455804				0.337335	0.498391													0.527413
4.98						0.532503	0.7249			0.474984				0.300067	0.487207													0.500752
5						0.51878	0.730343			0.427625				0.322465	0.4798													0.520558
5.02						0.509732	0.689343			0.473271				0.322366	0.497085													0.522088
5.04						0.5168	0.716462			0.450744				0.323181	0.496264													0.510751
5.06						0.52371	0.715681			0.462623				0.321185	0.502497													0.536372
5.08						0.515173	0.715674			0.514695				0.316006	0.465359													0.510684
5.1						0.513437	0.715417			0.452648				0.297493														0.503373
5.12						0.5188	0.720477			0.44799				0.29851	0.496403													0.515021
5.14						0.528543	0.718247			0.535228				0.304121	0.508082													0.509484
5.16						0.523799	0.732738			0.424673				0.33395	0.48467													0.522222
5.18						0.540308	0.724222			0.459155				0.346092	0.482443													0.520713
5.2						0.510587	0.734897			0.490866				0.311637	0.493287													0.518716
5.22						0.505385	0.71924			0.478714				0.333904	0.487026													0.533005
5.24						0.520107	0.736979			0.494859				0.269126	0.499765													0.508381
5.26						0.52502	0.725472			0.497712				0.370618	0.501363													0.52327
5.28						0.526357	0.742686			0.466925				0.295942														0.524976
5.3						0.509501	0.757185			0.483743				0.34137	0.514703													0.516502
5.32						0.501744	0.73501			0.428646				0.341946	0.529436													0.509879
5.34						0.526006	0.74648			0.461951				0.321437	0.492393													0.522523
5.36						0.513039	0.736263			0.492845				0.324135	0.472497													0.520316
5.38						0.515152	0.751729			0.527675				0.324125	0.474278													0.533125
5.4						0.514598	0.753635			0.480291				0.303602														0.524747
5.42						0.505769	0.757201			0.508543				0.304307														0.516713
5.44						0.537697	0.745201			0.52258				0.266597	0.480147													0.536849
5.46						0.540463	0.756608			0.513563				0.342113	0.507229													0.515224
5.48						0.516214	0.772862			0.449799				0.320136	0.481773													0.533597
5.5						0.504372	0.765036			0.479206				0.355114	0.506926													0.508976
5.52						0.532671	0.765108			0.473586				0.334762	0.486915													0.525435
5.54						0.505409	0.77299			0.497596				0.35101	0.485388													0.508839
5.56						0.521285	0.767649			0.525965				0.366199	0.482835													0.543346
5.58						0.531194	0.763053			0.525104				0.309971														0.538129
5.6						0.513225	0.783964			0.496951				0.307302	0.509292													0.525645
5.62						0.52019	0.781022			0.525463				0.355018	0.49795													0.534596
5.64						0.529607	0.790376			0.517071				0.361603	0.50563													0.540019
5.66						0.504313	0.797078			0.540176				0.321692														0.507291
5.68						0.527593	0.787217			0.524684				0.34264	0.494757													0.541208
5.7						0.522648	0.797746			0.477327				0.305674	0.491123													0.544098
5.72						0.536551	0.790857			0.514288				0.343374	0.465017													0.531038
5.74						0.542766	0.801111			0.502428				0.314934	0.488802													0.519613
5.76						0.538881	0.81307			0.543899				0.328373	0.494024													0.541449
5.78						0.53854	0.825317			0.510146				0.321496	0.487884													0.522214
5.8						0.527929	0.799488			0.497885				0.317905	0.50196													0.547427
5.82						0.555552	0.827169			0.516929				0.311143	0.48244													0.530257
5.84						0.550666	0.83329			0.537746				0.358719	0.498092													0.563068
5.86						0.54349	0.816881			0.530243				0.335265	0.504383													0.534596
5.88						0.525183	0.817521			0.514003				0.363153	0.470095													0.558963
5.9						0.535117	0.834553			0.527175				0.306173	0.46878													0.541176
5.92						0.542924	0.815339			0.551778				0.319541	0.489722													0.539311
5.94						0.54639	0.82334			0.541106				0.323264	0.488465													0.548601
5.96						0.541351	0.811708			0.551318				0.31697	0.497046													0.556422
5.98						0.553768	0.793301			0.550556				0.307339	0.508225													0.536311
6						0.544363	0.792474			0.546821				0.311836	0.497237													0.534786
6.02						0.541186	0.799511			0.552166				0.347161														0.542306
6.04						0.549935	0.680889			0.534241				0.321862														0.537095
6.06						0.526097				0.549937				0.36852	0.489768													0.524837
6.08						0.532779				0.531982				0.337257														0.55693
6.1						0.524257				0.493427				0.353519	0.525265													0.542019
6.12						0.545654				0.531408				0.321931	0.477236													0.571992
6.14						0.523604				0.501842				0.3418	0.498214													0.55537
6.16						0.561012				0.574808				0.346276	0.490253													0.536946
6.18						0.553247				0.540407				0.350999	0.510827													0.525806
6.2						0.523879				0.51073				0.325817	0.48107													0.534636
6.22						0.537623				0.54685				0.336211	0.526912													0.535574
6.24						0.534336				0.519536				0.248151	0.503941													0.539131
6.26						0.550057				0.515812				0.370553	0.485908													0.544079
6.28						0.549045				0.504896				0.324012	0.507933													0.527195
6.3						0.559742				0.538739				0.354466														0.555476
6.32						0.540029				0.525801				0.354871	0.50254													0.527373
6.34						0.545507				0.514061				0.358868	0.503464													0.540522
6.36						0.543375				0.531538				0.330038	0.488691													0.534952
6.38						0.541985				0.535674				0.348333														0.53961
6.4						0.529986				0.538864				0.314841	0.513952													0.519397
6.42						0.548207				0.585149				0.309113	0.507441													0.536679
6.44						0.552346				0.488512				0.332785	0.510202													0.515639
6.46						0.535517				0.547216				0.383368	0.498968													0.565216
6.48						0.551663				0.496888				0.314605	0.5089													0.561288
6.5						0.552994				0.480423				0.374212	0.521605													0.565916
6.52						0.545916				0.541502				0.275407	0.496265													0.544804
6.54						0.537436				0.544411				0.316207														0.558081
6.56						0.554627				0.510066				0.330408	0.513681													0.56432
6.58						0.53159				0.502031				0.287221	0.511077													0.548066
6.6						0.539116				0.537205				0.374464	0.482784													0.542093
6.62						0.529523				0.540996				0.316845	0.517193													0.542194
6.64						0.532043				0.539266				0.349231	0.520333													0.556325
6.66						0.554384				0.524546				0.345809	0.499152													0.571122
6.68						0.518969				0.613792				0.306463	0.496989													0.537565
6.7						0.561203				0.523149				0.332806	0.536077													0.556899
6.72						0.521381				0.486186				0.297483														0.565866
6.74						0.533316				0.548352				0.320476	0.506334													0.551341
6.76						0.543058				0.516834				0.319448	0.522187													0.564328
6.78						0.539937				0.554842				0.324538	0.54244													0.561336
6.8						0.554017				0.511886				0.283492														0.542323
6.82						0.566852				0.538963				0.337548	0.508475													0.558267
6.84						0.505153				0.594008				0.327772														0.563183
6.86						0.551761				0.545513				0.257639	0.509343													0.543957
6.88						0.540366				0.538077				0.314531	0.509462													0.542926
6.9						0.54507				0.553595				0.358859	0.508243													0.568103
6.92						0.533481				0.545399				0.35217	0.504131													0.554694
6.94						0.539367				0.512959				0.31467	0.500272													0.541064
6.96						0.555046				0.55176				0.333778	0.517142													0.557477
6.98						0.540502				0.532548				0.313228	0.513197													0.549739
7						0.558784				0.564409				0.376322	0.490037													0.559714
7.02						0.568953				0.637386				0.340817	0.520372													0.542634
7.04						0.541777				0.541861				0.35208	0.518341													0.542973
7.06						0.566799				0.562357				0.284433	0.532802													0.576742
7.08						0.554459				0.636852				0.329605	0.494532													0.561526
7.1						0.552995				0.536269				0.336473														0.553065
7.12						0.561562				0.546613				0.315076	0.475281													0.560489
7.14						0.543456				0.581336				0.322584	0.522725													0.565638
7.16						0.552815				0.476393				0.314097														0.563516
7.18						0.543269				0.534841				0.320059														0.567781
7.2						0.541801				0.525427				0.354011	0.531472													0.566498
7.22						0.549129				0.53308				0.344999														0.571572
7.24						0.533351				0.637291				0.350672	0.539075													0.542524
7.26						0.557128				0.559705				0.33793	0.506167													0.563242
7.28						0.547205				0.604527				0.321243	0.515933													0.534636
7.3						0.579901				0.530699				0.332617	0.516739													0.558593
7.32						0.560692				0.513185				0.346593	0.526811													0.540353
7.34						0.565935				0.565578				0.361598	0.52121													0.571628
7.36						0.566441				0.600417				0.270868	0.525513													0.565019
7.38						0.549994				0.528059				0.338366	0.487993													0.565608
7.4						0.572991				0.665281				0.341014	0.517584													0.547322
7.42						0.557168				0.545605				0.344293	0.525954													0.556221
7.44						0.553993				0.633839				0.336899	0.51673													0.547334
7.46						0.548165				0.62969				0.340908	0.517694													0.562313
7.48						0.550168				0.67551				0.310688	0.5206													0.565017
7.5						0.546026				0.680923				0.345979														0.562823
7.52						0.576978				0.576481				0.326314	0.533624													0.571495
7.54						0.551169				0.59651				0.317407														0.58148
7.56						0.576864				0.562237				0.29992	0.490371													0.557867
7.58						0.549218								0.323244	0.50854													0.572862
7.6						0.550999				0.644531				0.382372														0.556981
7.62						0.575916				0.66043				0.276874	0.517894													0.544514
7.64						0.575143								0.26827	0.485604													0.544483
7.66						0.557427				0.616709				0.326437	0.530764													0.560019
7.68						0.573957								0.303045	0.516936													0.569828
7.7						0.555716								0.32649	0.501157													0.582843
7.72						0.585657								0.30145														0.560797
7.74						0.563322								0.351343	0.493183													0.565138
7.76						0.569507								0.332263	0.528996													0.546753
7.78						0.548879				0.600768				0.353786														0.572342
7.8						0.573338								0.345401	0.518919													0.582506
7.82						0.581173								0.308649	0.518874													0.5525
7.84						0.554332								0.340556	0.520399													0.556011
7.86						0.571981								0.34689	0.516672													0.549315
7.88						0.584319								0.326979	0.51071													0.567956
7.9						0.558324								0.339039	0.536684													0.575703
7.92						0.549064								0.326133	0.509291													0.540199
7.94						0.546619								0.312327	0.538797													0.542484
7.96						0.563486								0.339133	0.518245													0.561808
7.98						0.559677								0.348872	0.540323													0.558113
8						0.569584								0.311463	0.510704													0.569071
8.02						0.563496								0.336434														0.579065
8.04						0.570705								0.345029	0.520111													0.577882
8.06						0.569331								0.335591	0.52276													0.569872
8.08						0.574021								0.348413														0.584022
8.1						0.581555								0.345351	0.536117													0.568852
8.12						0.572472								0.290791	0.513024													0.557171
8.14						0.576761								0.327575	0.523314													0.567789
8.16						0.570349								0.326405	0.52266													0.551279
8.18						0.572803								0.316344	0.520215													0.561622
8.2						0.584074								0.350037	0.519149													0.55617
8.22						0.590774								0.338274	0.506664													0.570513
8.24						0.59507								0.335863	0.552867													0.559647
8.26						0.548375								0.333142														0.563663
8.28						0.570403								0.337752														0.571481
8.3						0.584625								0.327064	0.520663													0.577243
8.32						0.593525								0.323425	0.532869													0.567083
8.34						0.5452								0.318804	0.520793													0.574738
8.36						0.552787								0.279663														0.572753
8.38						0.549001								0.310283	0.533519													0.552801
8.4						0.56587								0.335327	0.526582													0.553888
8.42						0.580894								0.294265	0.529983													0.558758
8.44						0.572555								0.347833	0.542897													0.568248
8.46						0.593436								0.339236														0.55604
8.48						0.557331								0.365721	0.52257													0.563843
8.5						0.580891								0.344928	0.531113													0.571208
8.52						0.587194								0.306824														0.575301
8.54						0.581123								0.254584	0.516387													0.569302
8.56						0.547979								0.281316	0.534508													0.571401
8.58						0.564124								0.331499	0.546564													0.555627
8.6						0.527367								0.258406														0.581957
8.62						0.539511								0.361689	0.563813													0.563231
8.64						0.596747								0.343113	0.505317													0.562833
8.66						0.585204								0.323992	0.515442													0.555355
8.68						0.557067								0.357889														0.569759
8.7						0.579004								0.341919														0.564423
8.72						0.563469								0.349999	0.535443													0.580889
8.74						0.561066								0.354339														0.564399
8.76						0.565968								0.286161														0.578876
8.78						0.563332								0.359808	0.514626													0.592259
8.8						0.578623								0.316599	0.567482													0.572455
8.82						0.584806								0.342491	0.505468													0.573821
8.84						0.576331								0.316632														0.549827
8.86						0.555139								0.281279														0.57615
8.88						0.574136								0.327663														0.562109
8.9						0.592567								0.341332	0.544137													0.572154
8.92						0.613834								0.313382	0.540526													0.586074
8.94						0.567134								0.301527	0.528778													0.579232
8.96						0.561545								0.272684	0.535698													0.585526
8.98						0.555805								0.302416	0.534128													0.554668
9						0.602531								0.315929	0.53854													0.542894
9.02						0.575383								0.313809	0.543319													0.5789
9.04						0.583496								0.234415	0.536948													0.582513
9.06						0.553023								0.294074														0.572671
9.08						0.579342								0.331293	0.534479													0.590402
9.1						0.580649								0.327334	0.498781													0.59517
9.12						0.557777								0.290397	0.542498													0.558242
9.14						0.588084								0.331049														0.589034
9.16						0.58913								0.340423	0.541256													0.570064
9.18						0.572219								0.30351														0.567061
9.2						0.596278								0.279777	0.53546													0.556885
9.22						0.575175								0.351617	0.530972													0.585232
9.24						0.580213								0.292673														0.586688
9.26						0.617422								0.368346	0.525696													0.554117
9.28						0.596958								0.32152														0.576813
9.3						0.559467								0.342832														0.591966
9.32						0.565841								0.338443	0.503869													0.583222
9.34						0.576537								0.294925	0.545344													0.573875
9.36						0.543727								0.28923	0.540801													0.583855
9.38						0.594489								0.33008	0.515787													0.575944
9.4						0.608365								0.33787	0.538146													0.56331
9.42						0.579324								0.265671	0.514958													0.607795
9.44						0.561979								0.306341														0.565876
9.46						0.574802								0.298472	0.529912													0.600863
9.48						0.595797								0.337668	0.532538													0.571498
9.5						0.576603								0.245141	0.536672													0.601494
9.52						0.588869								0.331751	0.555024													0.568756
9.54						0.612083								0.323742	0.540594													0.570302
9.56						0.585134								0.29929	0.533847													0.579946
9.58						0.581103								0.267688	0.544257													0.605719
9.6						0.579645								0.35394	0.546606													0.580139
9.62						0.591026								0.324505														0.5906
9.64						0.620774								0.28531	0.525236													0.596336
9.66						0.577545								0.374242														0.575359
9.68						0.58225								0.330068														0.587074
9.7						0.568365								0.271217	0.530289													0.592665
9.72						0.603483								0.31576	0.551137													0.5914
9.74						0.596944								0.298208	0.531638													0.578756
9.76						0.57966								0.222553	0.536543													0.579878
9.78						0.575139								0.299224	0.504043													0.584113
9.8						0.585954								0.340583	0.520454													0.611804
9.82						0.604208								0.319425														0.5704
9.84						0.582513								0.345288	0.542934													0.597708
9.86						0.612383								0.329086	0.526577													0.595223
9.88						0.553881								0.303447	0.550965													0.577834
9.9						0.580397								0.32221														0.602917
9.92						0.596741								0.290749														0.585201
9.94						0.623325								0.339828	0.551373													0.593257
9.96						0.592573								0.339727														0.589745
9.98						0.578306								0.330434	0.547733													0.594687
10						0.595163								0.290122	0.532294													0.592967
10.02						0.563448								0.360946	0.52505													0.588071
10.04						0.606587								0.305016	0.523485													0.598691
10.06						0.568041								0.278869	0.539644													0.603218
10.08						0.561956								0.326437	0.534802													0.58221
10.1						0.589914								0.293149	0.529181													0.576877
10.12						0.593893								0.32708	0.543643													0.596445
10.14						0.578425								0.243692														0.581505
10.16						0.581176								0.346958	0.540416													0.612296
10.18						0.59427								0.365147	0.540252													0.58359
10.2						0.593789								0.311271	0.555958													0.595396
10.22						0.596995								0.290633	0.567046													0.594437
10.24						0.579841								0.335674														0.611913
10.26						0.580909								0.349875	0.554624													0.589858
10.28						0.583146								0.314178	0.537085													0.592466
10.3						0.564314								0.272979	0.557104													0.587979
10.32						0.58709								0.324012	0.54017													0.606682
10.34						0.629164								0.34265	0.554058													0.587629
10.36						0.58201								0.288432	0.536855													0.616528
10.38						0.617482								0.336386	0.557302													0.609168
10.4						0.589677								0.334555														0.602363
10.42						0.608591								0.32405	0.532286													0.589236
10.44						0.599762								0.294871	0.556399													0.60429
10.46						0.607028								0.267054														0.588811
10.48						0.582458								0.38417														0.594631
10.5						0.596274								0.27921														0.592227
10.52						0.599114								0.337638														0.605815
10.54						0.587229								0.332911	0.563742													0.585448
10.56						0.582707								0.360941	0.572627													0.583758
10.58						0.575359								0.360655	0.566375													0.579167
10.6						0.590409								0.33363	0.565052													0.598518
10.62						0.568445								0.362052														0.588794
10.64						0.580904								0.339999	0.538491													0.592246
10.66						0.611466								0.305278	0.569731													0.582027
10.68						0.615569								0.327626	0.5806													0.6207
10.7						0.569852								0.276435	0.5425													0.609578
10.72						0.596072								0.276636	0.560786													0.601611
10.74						0.557266								0.321496	0.526199													0.593912
10.76						0.563104								0.322624	0.573568													0.595975
10.78						0.589212								0.382124	0.554828													0.595038
10.8						0.549968								0.264323	0.556363													0.593786
10.82						0.591916								0.301882	0.548801													0.58911
10.84						0.578317								0.321153														0.580417
10.86						0.583413								0.347783	0.549974													0.599097
10.88						0.576772								0.317522	0.57089													0.605061
10.9						0.572807								0.237586	0.547672													0.619459
10.92						0.611938								0.332643	0.545691													0.614434
10.94						0.58772								0.371511	0.596166													0.597401
10.96						0.60111								0.324935	0.575504													0.612669
10.98						0.554348								0.37237														0.611225
11						0.617206								0.336039	0.538179													0.611334
11.02						0.600275								0.291016	0.562987													0.595821
11.04						0.568293								0.309536														0.612584
11.06						0.618771								0.334052	0.54996													0.610676
11.08						0.594669								0.318176														0.608147
11.1						0.601187								0.333078														0.604742
11.12						0.576191								0.25959	0.544883													0.589032
11.14						0.590018								0.328107														0.598752
11.16						0.569643								0.293683														0.608021
11.18						0.5919								0.283287	0.552767													0.604046
11.2						0.614209								0.342792	0.556747													0.592264
11.22						0.582979								0.35649	0.547082													0.608066
11.24						0.582874								0.269448	0.572631													0.614371
11.26						0.586719								0.328597														0.606853
11.28						0.611249								0.377584	0.553729													0.610713
11.3						0.627406								0.359961	0.567061													0.61662
11.32						0.604089								0.345178	0.548692													0.605869
11.34						0.616325								0.337583	0.569886													0.602397
11.36						0.556472								0.339182	0.572694													0.606026
11.38						0.572774								0.366871														0.594568
11.4						0.600635								0.346164	0.559341													0.606918
11.42						0.573739								0.344379														0.600328
11.44						0.568155								0.302838	0.56347													0.618839
11.46						0.568527								0.342071	0.557132													0.617084
11.48						0.580324								0.28586														0.585976
11.5						0.561453								0.323385														0.592214
11.52						0.589998								0.291412														0.609355
11.54						0.632186								0.296356	0.55221													0.585698
11.56						0.604914								0.367844														0.605537
11.58						0.628216								0.358469	0.56633													0.613651
11.6						0.614754								0.367313	0.560291													0.601494
11.62						0.588176								0.355091	0.570625													0.596581
11.64						0.613193								0.297464	0.549424													0.599704
11.66						0.622024								0.353107	0.557206													0.609609
11.68						0.598309								0.347364	0.573588													0.612945
11.7						0.592587								0.345093	0.556885													0.612277
11.72						0.597277								0.381388	0.587054													0.59625
11.74						0.606444								0.365377	0.583051													0.611672
11.76						0.615588								0.34647	0.564145													0.614265
11.78						0.575648								0.324026														0.601714
11.8						0.605708								0.342688	0.583673													0.599556
11.82						0.625614								0.374508														0.620727
11.84						0.619928								0.30655	0.570249													0.599753
11.86						0.60503								0.35763	0.56181													0.611151
11.88						0.610451								0.31693	0.579849													0.61049
11.9						0.619506								0.346373														0.607036
11.92						0.591586								0.353282	0.560691													0.596734
11.94						0.596293								0.323658														0.599574
11.96						0.609037								0.291298	0.568342													0.610742
11.98						0.610405								0.323541	0.557366													0.607627
12						0.5916								0.333237	0.576746													0.604001
12.02						0.604821								0.298812	0.567751													0.612887
12.04						0.593214								0.339981	0.572371													0.602954
12.06						0.589267								0.337722	0.55366													0.614352
12.08						0.611396								0.348247														0.611593
12.1						0.611413								0.274543	0.570227													0.599342
12.12						0.639211								0.353881	0.546972													0.631412
12.14						0.605751								0.362149														0.599856
12.16						0.594611								0.33995	0.560771													0.613703
12.18						0.617619								0.348218	0.561073													0.586467
12.2						0.585631								0.341149	0.570792													0.644375
12.22						0.601691								0.331605	0.568779													0.594741
12.24						0.588003								0.373007	0.579691													0.60753
12.26						0.605573								0.360158														0.601563
12.28						0.595184								0.369547	0.563256													0.606605
12.3						0.604872								0.266753	0.59804													0.630699
12.32						0.582085								0.308961	0.567307													0.597868
12.34						0.599594								0.36556	0.588193													0.621578
12.36						0.625905								0.358456	0.604778													0.61382
12.38						0.596793								0.333643														0.602207
12.4						0.622077								0.280037	0.588247													0.614474
12.42						0.629313								0.329875	0.587651													0.642918
12.44						0.634625								0.302871														0.600861
12.46						0.615608								0.299722	0.555339													0.621536
12.48						0.608935								0.297338														0.596336
12.5						0.61941								0.343885	0.558534													0.601586
12.52						0.627199								0.344384	0.578031													0.627725
12.54						0.620604								0.360058	0.574586													0.639381
12.56						0.586989								0.290272	0.552706													0.62807
12.58						0.590257								0.378021														0.610166
12.6						0.61835								0.421479	0.550918													0.618792
12.62						0.624625								0.360152	0.570945													0.616178
12.64						0.637443								0.346394	0.600237													0.620024
12.66						0.597267								0.414144	0.569062													0.614192
12.68						0.613716								0.362965														0.627081
12.7						0.633389								0.373627	0.578551													0.621339
12.72						0.612996								0.277657	0.574524													0.632067
12.74						0.603446								0.342234	0.547575													0.618403
12.76						0.606653								0.355822	0.577128													0.632204
12.78						0.623701								0.354332	0.562443													0.615371
12.8						0.624622								0.338461	0.562964													0.641703
12.82						0.614315								0.335938	0.573494													0.628592
12.84						0.615361								0.425873														0.604441
12.86						0.618137								0.307504	0.550548													0.63045
12.88						0.634755								0.307451	0.567432													0.620105
12.9						0.610935								0.374954														0.625376
12.92						0.597893								0.270513	0.588683													0.641635
12.94						0.638106								0.352301	0.58542													0.609775
12.96						0.614297								0.328553	0.589485													0.643341
12.98						0.609637								0.330701	0.592147													0.635856
13						0.599001								0.36588	0.57488													0.614554
13.02						0.605652								0.357074														0.613527
13.04						0.635075								0.348502														0.604487
13.06						0.606014								0.299495	0.579261													0.635844
13.08						0.605902								0.302519														0.638192
13.1						0.64688								0.313748	0.599919													0.636573
13.12						0.634363								0.343586	0.55873													0.640685
13.14						0.590908								0.340163	0.559355													0.608795
13.16						0.612133								0.351114	0.587423													0.629589
13.18						0.615787								0.323911	0.549941													0.61726
13.2						0.627196								0.37538														0.623429
13.22						0.631192								0.351236	0.589334													0.633344
13.24						0.599478								0.381339	0.576537													0.627298
13.26						0.632144								0.292428	0.594415													0.646784
13.28						0.629088								0.27384	0.584161													0.616801
13.3						0.631897								0.374599	0.578832													0.618886
13.32						0.613511								0.309446	0.570519													0.62614
13.34						0.625459								0.297089														0.616311
13.36						0.600682								0.338731	0.596729													0.634858
13.38						0.599112								0.301091	0.580061													0.644455
13.4						0.600064								0.356149	0.581446													0.604322
13.42						0.6502								0.378128	0.587419													0.61614
13.44						0.628864								0.359482	0.599819													0.636607
13.46						0.633429								0.341982														0.637818
13.48						0.614245								0.334359	0.577985													0.645436
13.5						0.601112								0.365466	0.564154													0.624406
13.52						0.630515								0.368995														0.644642
13.54						0.60407								0.369417														0.61627
13.56						0.59458								0.365371	0.569267													0.658117
13.58						0.656648								0.328777	0.60296													0.634342
13.6						0.598522								0.32113	0.605929													0.634023
13.62						0.669748								0.36818	0.59055													0.645865
13.64						0.621457								0.354831														0.641252
13.66						0.668529								0.318414	0.598749													0.626282
13.68						0.624913								0.370297														0.641659
13.7						0.650052								0.399999	0.601592													0.652722
13.72						0.612188								0.376593	0.611617													0.643155
13.74						0.618497								0.367761														0.661532
13.76						0.609976								0.383884	0.574303													0.643849
13.78						0.607142								0.361156	0.582295													0.656404
13.8						0.629472								0.33763	0.595941													0.629284
13.82						0.609778								0.344013	0.613475													0.647344
13.84						0.615102								0.340815														0.654584
13.86						0.615455								0.32807														0.629493
13.88						0.63005								0.316674	0.546944													0.654858
13.9						0.647468								0.312045	0.601155													0.658793
13.92						0.609305								0.383122	0.573066													0.633043
13.94						0.624288								0.326368	0.599243													0.646466
13.96						0.62347								0.332185	0.593163													0.646934
13.98						0.632506								0.335739	0.58704													0.631096
14						0.608451								0.340327	0.619028													0.660078
14.02						0.618054								0.306359														0.647286
14.04						0.644083								0.32953	0.616006													0.637081
14.06						0.633227								0.324057														0.645391
14.08						0.651201								0.367639														0.654457
14.1						0.644795								0.360277														0.654735
14.12						0.640571								0.316115	0.59379													0.624852
14.14						0.61072								0.296607	0.585041													0.643372
14.16						0.621306								0.357224	0.611228													0.668536
14.18						0.647637								0.361406	0.59434													0.653179
14.2						0.640998								0.35176														0.63916
14.22						0.642341								0.367771	0.595473													0.650518
14.24						0.631421								0.347395	0.589086													0.665056
14.26						0.641463								0.319218														0.659794
14.28						0.613239								0.326356														0.638626
14.3						0.645233								0.283933	0.587657													0.643942
14.32						0.61643								0.372776														0.643065
14.34						0.659059								0.325992														0.670147
14.36						0.622086								0.284735	0.615692													0.653649
14.38						0.643774								0.325295														0.640556
14.4						0.647023								0.374873														0.654862
14.42						0.652671								0.320547	0.603307													0.648311
14.44						0.641431								0.346139	0.587394													0.643205
14.46						0.627567								0.358723														0.655732
14.48						0.642495								0.360896	0.581354													0.667882
14.5						0.620792								0.323191	0.591481													0.646126
14.52						0.634813								0.321907														0.668183
14.54						0.649898								0.351311														0.658068
14.56						0.638027								0.358441	0.595456													0.649883
14.58						0.622258								0.387532	0.57939													0.643294
14.6						0.656086								0.359389	0.581582													0.644128
14.62						0.629659								0.282406	0.608241													0.655182
14.64						0.654251								0.310154	0.610573													0.648398
14.66						0.653774								0.340988	0.602112													0.65201
14.68						0.618961								0.351983	0.582913													0.643287
14.7						0.620451								0.364688	0.601667													0.663818
14.72						0.645606								0.315309														0.644482
14.74						0.642558								0.374549	0.591409													0.654364
14.76						0.669221								0.312179														0.651536
14.78						0.626794								0.292713														0.652908
14.8						0.627518								0.355268	0.604716													0.662019
14.82						0.62868								0.304773	0.59914													0.64585
14.84						0.639977								0.330539														0.67209
14.86						0.612604								0.306904	0.609088													0.657747
14.88						0.657761								0.365299	0.606255													0.647445
14.9						0.645149								0.376618	0.619437													0.627811
14.92						0.651212								0.31246	0.58517													0.655322
14.94						0.628891								0.345188														0.659084
14.96						0.645824								0.389815	0.594566													0.639029
14.98						0.64058								0.342187														0.654417
15						0.643136								0.352492														0.663003
15.02						0.633538								0.282466														0.648737
15.04						0.636588								0.331777	0.610762													0.638247
15.06						0.623317								0.298488														0.656322
15.08						0.621551								0.345939														0.657901
15.1						0.677727								0.376679	0.620489													0.644456
15.12						0.657209								0.344174	0.599891													0.660967
15.14						0.624629								0.376149	0.611352													0.644776
15.16						0.621417								0.391902														0.674222
15.18						0.624289								0.365442	0.603664													0.658061
15.2						0.622672								0.348647	0.598239													0.650798
15.22						0.647698								0.31117	0.605407													0.646604
15.24						0.649935								0.367574														0.651715
15.26						0.617742								0.270217	0.59161													0.657416
15.28						0.621931								0.273738														0.650915
15.3						0.64412								0.360984														0.663336
15.32						0.629492								0.315379														0.666668
15.34						0.638412								0.383954														0.642751
15.36						0.648637								0.319094														0.660962
15.38						0.678802								0.3814														0.660151
15.4						0.622392								0.381333														0.63548
15.42						0.6225								0.331085														0.65158
15.44						0.641163								0.30861														0.66591
15.46						0.618995								0.351319	0.592318													0.671318
15.48						0.641118								0.369942														0.66478
15.5						0.622306								0.36167														0.644031
15.52						0.671524								0.392464														0.661645
15.54						0.650601								0.355262														0.649483
15.56						0.640301								0.352476														0.652816
15.58						0.640315								0.277509	0.593103													0.64018
15.6						0.656969								0.370451														0.660423
15.62						0.626171								0.303956														0.667035
15.64						0.636914								0.357937														0.650414
15.66						0.64497								0.348402														0.653952
15.68						0.664314								0.367428	0.597188													0.67576
15.7						0.654421								0.347017														0.658279
15.72						0.661494								0.364762														0.654357
15.74						0.652693								0.367557	0.615083													0.659477
15.76						0.647891								0.361924														0.662114
15.78						0.650246								0.361078														0.678078
15.8						0.633714								0.326006														0.687563
15.82						0.651478								0.30404														0.649127
15.84						0.662337								0.283237														0.662462
15.86						0.635517								0.297624														0.660546
15.88						0.669391								0.377784														0.677931
15.9						0.644109								0.319948	0.600083													0.646336
15.92						0.664048								0.369662														0.651061
15.94						0.629071								0.365929														0.67918
15.96						0.653851								0.313168														0.660772
15.98						0.627692								0.367003														0.656515
16						0.673364								0.348152														0.696415
16.02						0.643509								0.347823														0.673421
16.04						0.635911								0.340023														0.684036
16.06						0.653198								0.363736														0.674922
16.08						0.665533								0.379082														0.670856
16.1						0.653571								0.402636														0.67234
16.12						0.654961								0.351596														0.675328
16.14						0.662911								0.357454														0.654007
16.16						0.634778								0.340007														0.685181
16.18						0.687059								0.29114														0.681171
16.2						0.683266								0.320418														0.671726
16.22						0.668237								0.384057														0.688135
16.24						0.653588								0.306833														0.700445
16.26						0.643207								0.345368														0.662528
16.28						0.621739								0.283608														0.678285
16.3						0.667854								0.361141														0.639597
16.32						0.637794								0.376157														0.678613
16.34						0.689326								0.359363														0.689122
16.36						0.69235								0.346504														0.680279
16.38						0.693633								0.35402														0.671254
16.4						0.663935								0.378239														0.665295
16.42						0.664289								0.351055														0.657714
16.44						0.653152								0.390762														0.686823
16.46						0.653633								0.208538														0.674733
16.48						0.633781								0.343736														0.664143
16.5						0.672077								0.412797														0.703203
16.52						0.661398								0.293708														0.691189
16.54						0.644529								0.354603														0.682664
16.56						0.635792								0.363861														0.700846
16.58						0.641329								0.380993														0.669461
16.6						0.664388								0.357482														0.678351
16.62						0.650097								0.288431														0.690292
16.64						0.658074								0.371058														0.678773
16.66						0.689204								0.400696														0.664574
16.68						0.660443								0.372962														0.660736
16.7						0.633045								0.372037														0.681052
16.72						0.671678								0.329447														0.687833
16.74						0.649981								0.387981														0.681052
16.76						0.67819								0.350168														0.687648
16.78						0.648641								0.33632														0.70056
16.8						0.68112								0.383262														0.6761
16.82						0.642701								0.317352														0.696439
16.84						0.623365								0.394859														0.679343
16.86						0.669167								0.337341														0.70038
16.88						0.68339								0.365746														0.705516
16.9						0.63903								0.377014														0.70263
16.92						0.646297								0.362436														0.667699
16.94						0.666914								0.361548														0.692543
16.96						0.638953								0.358267														0.696415
16.98						0.661376								0.367362														0.684023
17						0.629318								0.363922														0.692445
17.02						0.667843								0.3923														0.692086
17.04						0.664826								0.357395														0.700075
17.06						0.668891								0.375113														0.716223
17.08						0.644634								0.364812														0.693698
17.1						0.66265								0.349634														0.713533
17.12						0.640581								0.355916														0.685106
17.14						0.675829								0.363908														0.697293
17.16						0.682661								0.353121														0.686404
17.18						0.659898								0.367121														0.707661
17.2						0.639582								0.372089														0.68926
17.22						0.668632								0.384282														0.661449
17.24						0.625381								0.36736														0.6866
17.26						0.645077								0.374902														0.702462
17.28						0.666154								0.389033														0.715406
17.3						0.672911								0.359772														0.695498
17.32						0.663572								0.375571														0.714937
17.34						0.63946								0.330282														0.718038
17.36						0.685755								0.374781														0.722671
17.38						0.643579								0.356165														0.720001
17.4						0.660459								0.351857														0.718519
17.42						0.700727								0.372489														0.687738
17.44						0.648221								0.309173														0.711697
17.46						0.638569								0.303132														0.715723
17.48						0.671674								0.358936														0.71206
17.5						0.669218								0.350372														0.710897
17.52						0.675566								0.406372														0.714746
17.54						0.654056								0.371481														0.7174
17.56						0.678199								0.381316														0.716509
17.58						0.698345								0.319541														0.721597
17.6						0.669507								0.375322														0.722749
17.62						0.720041								0.366222														0.714976
17.64						0.670333								0.381098														0.71639
17.66						0.663243								0.314699														0.715399
17.68						0.673215								0.308151														0.708443
17.7						0.663429								0.356151														0.73084
17.72						0.657969								0.404343														0.700939
17.74						0.637171								0.307411														0.707399
17.76						0.655413								0.29151														0.737028
17.78						0.652049								0.328365														0.725392
17.8						0.65856								0.321914														0.72247
17.82						0.649242								0.366718														0.692506
17.84						0.666439								0.360546														0.71407
17.86						0.668951								0.410116														0.720289
17.88						0.671046								0.363233														0.730609
17.9						0.660816								0.364407														0.724359
17.92						0.648417								0.276743														0.732444
17.94						0.660601								0.345642														0.739055
17.96						0.672204								0.341871														0.759833
17.98						0.673954								0.357445														0.722587
18						0.686614								0.36389														0.728447
18.02						0.659743								0.320275														0.748907
18.04						0.659813								0.323154														0.731909
18.06						0.641165								0.368741														0.727575
18.08						0.657438								0.382162														0.716837
18.1						0.670157								0.336036														0.741874
18.12						0.683806								0.285082														0.701706
18.14						0.672042								0.321835														0.718786
18.16						0.640774								0.396105														0.697931
18.18						0.658615								0.277324														0.71968
18.2						0.665715								0.360826														0.733248
18.22						0.664061								0.359748														0.723535
18.24						0.699261								0.37682														0.71839
18.26						0.671155								0.390295														0.738776
18.28						0.649219								0.374659														0.718069
18.3						0.689333								0.308563														0.714316
18.32						0.681463								0.384699														0.715116
18.34						0.68912								0.314516														0.719907
18.36						0.676309								0.379272														0.70823
18.38						0.664407								0.310142														0.711473
18.4						0.684108								0.379002														0.709335
18.42						0.68702								0.396893														0.709962
18.44						0.655924								0.384547														0.688428
18.46						0.705115								0.322618														0.696644
18.48						0.64283								0.39061														0.651767
18.5						0.689493								0.366054														0.640481
18.52						0.678795								0.396274														0.6259
18.54						0.688951								0.357288														0.625883
18.56						0.675254								0.358006														0.528061
18.58						0.657563								0.369989
18.6						0.652622								0.331193
18.62						0.687456								0.386819
18.64						0.693823								0.350911
18.66						0.648751								0.322185
18.68						0.698286								0.392755
18.7						0.638547								0.37214
18.72						0.689675								0.302302
18.74						0.708507								0.371817
18.76						0.676793								0.377822
18.78						0.654684								0.288282
18.8						0.686878								0.380367
18.82						0.658941								0.392637
18.84						0.657097								0.413199
18.86						0.693063								0.345212
18.88						0.663463								0.381627
18.9						0.694682								0.390227
18.92						0.693956								0.345175
18.94						0.684757								0.412675
18.96						0.665427								0.332502
18.98						0.652174								0.36383
19						0.684462								0.293381
19.02						0.67403								0.369562
19.04						0.685025								0.338441
19.06						0.65848								0.330586
19.08						0.696623								0.379826
19.1						0.691464								0.382017
19.12						0.673913								0.248915
19.14						0.714623								0.393853
19.16						0.678824								0.382495
19.18						0.660122								0.408301
19.2						0.644331								0.394604
19.22						0.691945								0.378847
19.24						0.729323								0.395017
19.26						0.696204								0.312978
19.28						0.697505								0.326929
19.3						0.691533								0.382199
19.32						0.690848								0.368261
19.34						0.693373								0.393095
19.36						0.666744								0.362768
19.38						0.653183								0.344466
19.4						0.678881								0.371687
19.42						0.680835								0.380398
19.44						0.675073								0.340346
19.46						0.701025								0.339381
19.48						0.693342								0.388542
19.5						0.690371								0.307839
19.52						0.677628								0.372922
19.54						0.663346								0.385315
19.56						0.691091								0.234807
19.58						0.679772								0.341288
19.6						0.687366								0.383947
19.62						0.719137								0.358792
19.64						0.686902								0.355446
19.66						0.686629								0.388244
19.68						0.723999								0.381429
19.7						0.662556								0.336492
19.72						0.677784								0.316146
19.74						0.680187								0.407845
19.76						0.682163								0.373579
19.78						0.698704								0.405768
19.8						0.664875								0.422906
19.82						0.690324								0.403748
19.84						0.680117								0.407461
19.86						0.71051								0.41209
19.88						0.691294								0.298739
19.9						0.67488								0.407972
19.92						0.724046								0.390917
19.94						0.687428								0.437292
19.96						0.692781								0.412047
19.98						0.699833								0.419941
20						0.713764								0.39387
20.02						0.670252								0.401654
20.04						0.700112								0.388797
20.06						0.692125								0.352403
20.08						0.691695								0.382294
20.1						0.697229								0.38543
20.12						0.701197								0.334811
20.14						0.716228								0.419016
20.16						0.679727								0.400357
20.18						0.692612								0.337476
20.2						0.702195								0.409846
20.22						0.691094								0.355046
20.24						0.674239								0.413676
20.26						0.673842								0.421992
20.28						0.682015								0.318206
20.3						0.678354								0.385961
20.32						0.704534								0.369916
20.34						0.689783								0.346341
20.36						0.7072								0.405888
20.38						0.688845								0.41024
20.4						0.692572								0.332711
20.42						0.685813								0.253542
20.44						0.705471								0.384132
20.46						0.671454								0.3497
20.48						0.710309								0.371692
20.5						0.68971								0.399932
20.52						0.704785								0.398419
20.54						0.685212								0.376964
20.56						0.661394								0.355469
20.58						0.706728								0.416335
20.6						0.697576								0.410175
20.62						0.668433								0.287887
20.64						0.681543								0.394111
20.66						0.719778								0.376604
20.68						0.680642								0.380113
20.7						0.684532								0.371712
20.72						0.691491								0.410382
20.74						0.68268								0.250162
20.76						0.700812								0.419711
20.78						0.683926								0.419099
20.8						0.669302								0.402893
20.82						0.713136								0.42517
20.84						0.676943								0.406406
20.86						0.698774								0.265949
20.88						0.724977								0.388908
20.9						0.656455								0.333531
20.92						0.690855								0.372819
20.94						0.710964								0.318536
20.96						0.700513								0.398232
20.98						0.711209								0.395307
21						0.679996								0.35219
21.02						0.697387								0.36073
21.04						0.689675								0.30647
21.06						0.692742								0.392033
21.08						0.671556								0.407833
21.1						0.690385								0.389831
21.12						0.703483								0.393962
21.14						0.71362								0.413031
21.16						0.690191								0.31806
21.18						0.715577								0.371902
21.2						0.687416								0.366438
21.22						0.679835								0.304216
21.24						0.719076								0.406207
21.26						0.705244								0.393126
21.28						0.71011								0.364465
21.3						0.697428								0.357566
21.32						0.659976								0.27457
21.34						0.663456								0.411714
21.36						0.69853								0.324251
21.38						0.713588								0.365859
21.4						0.696856								0.379258
21.42						0.668944								0.354986
21.44						0.708057								0.413788
21.46						0.675568								0.385631
21.48						0.689972								0.269311
21.5						0.673001								0.356862
21.52						0.711908								0.358569
21.54						0.695244								0.384725
21.56						0.670549								0.386495
21.58						0.66767								0.272386
21.6						0.6892								0.372053
21.62						0.688294								0.36145
21.64						0.703201								0.328422
21.66						0.694495								0.40818
21.68						0.70006								0.375657
21.7						0.721789								0.353876
21.72						0.684306								0.347539
21.74						0.708146								0.300055
21.76						0.695478								0.33263
21.78						0.684233								0.448044
21.8						0.712855								0.367828
21.82						0.674627								0.388694
21.84						0.7131								0.364138
21.86						0.703286								0.40132
21.88						0.708722								0.355005
21.9						0.707946								0.38699
21.92						0.715509								0.344038
21.94						0.723374								0.429856
21.96						0.693153								0.425495
21.98						0.70424								0.326979
22						0.694759								0.422045
22.02						0.70335								0.402595
22.04						0.694249								0.416296
22.06						0.70815								0.428751
22.08						0.697984								0.315095
22.1						0.685938								0.342688
22.12						0.6921								0.415277
22.14						0.704894								0.339994
22.16						0.692635								0.357601
22.18						0.694454								0.405101
22.2						0.731939								0.369913
22.22						0.696209								0.401638
22.24						0.708632								0.392454
22.26						0.710946								0.371953
22.28						0.666545								0.373336
22.3						0.713161								0.366559
22.32						0.688536								0.397803
22.34						0.732411								0.351773
22.36						0.684784								0.385439
22.38						0.701798								0.418813
22.4						0.705545								0.33772
22.42						0.724577								0.417816
22.44						0.714564								0.370265
22.46						0.698991								0.359777
22.48						0.699472								0.276344
22.5						0.70024								0.406296
22.52						0.70827								0.369184
22.54						0.711064								0.430999
22.56						0.680544								0.404873
22.58						0.698363								0.422469
22.6						0.698613								0.371878
22.62						0.700123								0.372341
22.64						0.702569								0.425677
22.66						0.700387								0.413953
22.68						0.730505								0.379736
22.7						0.701638								0.395682
22.72						0.688465								0.424643
22.74						0.70721								0.398621
22.76						0.688578								0.393276
22.78						0.718038								0.435006
22.8						0.708528								0.380765
22.82						0.704524								0.315094
22.84						0.701939								0.350058
22.86						0.690316								0.414597
22.88						0.704685								0.406426
22.9						0.682844								0.400606
22.92						0.709479								0.419213
22.94						0.71655								0.360941
22.96						0.695606								0.438026
22.98						0.717721								0.378095
23						0.707716								0.396545
23.02						0.716829								0.304398
23.04						0.718521								0.442238
23.06						0.718609								0.361428
23.08						0.715174								0.412754
23.1						0.685591								0.347328
23.12						0.707172								0.379267
23.14						0.706623								0.351179
23.16						0.666311								0.424781
23.18						0.714023								0.384518
23.2						0.676632								0.411
23.22						0.708766								0.377807
23.24						0.721927								0.358447
23.26						0.712895								0.423583
23.28						0.71995								0.36777
23.3						0.742483								0.38629
23.32						0.717398								0.430693
23.34						0.696398								0.403935
23.36						0.699891								0.317509
23.38						0.724779								0.313775
23.4						0.687031								0.331123
23.42						0.718044								0.396732
23.44						0.717875								0.304316
23.46						0.719098								0.327803
23.48						0.708341								0.356211
23.5						0.708984								0.434657
23.52						0.725145								0.334569
23.54						0.703169								0.44623
23.56						0.681279								0.37901
23.58						0.713512								0.359816
23.6						0.698592								0.431353
23.62						0.721571								0.355204
23.64						0.697983								0.349538
23.66						0.706009								0.409403
23.68						0.765152								0.376
23.7						0.713547								0.344061
23.72						0.716826								0.368464
23.74						0.721152								0.437311
23.76						0.740347								0.419698
23.78						0.711608								0.434815
23.8						0.720197								0.302173
23.82						0.705341								0.324938
23.84						0.712509								0.352821
23.86						0.718851								0.349068
23.88						0.729834								0.372975
23.9						0.70088								0.336705
23.92						0.711217								0.334173
23.94						0.71121								0.385952
23.96						0.72759								0.321733
23.98						0.728615								0.399119
24						0.686823								0.410141
24.02						0.697991								0.377531
24.04						0.708416								0.337327
24.06						0.702746								0.431828
24.08						0.750415								0.326342
24.1						0.708008								0.385392
24.12						0.717069								0.342186
24.14						0.697804								0.352116
24.16						0.74449								0.407088
24.18						0.697987								0.396797
24.2						0.710114								0.358899
24.22						0.72875								0.348506
24.24						0.718874								0.319938
24.26						0.71447								0.366946
24.28						0.703244								0.428998
24.3						0.744046								0.343995
24.32						0.705764								0.300881
24.34						0.696894								0.317275
24.36						0.733681								0.428809
24.38						0.712052								0.442915
24.4						0.726818								0.423986
24.42						0.698997								0.386014
24.44						0.705345								0.343808
24.46						0.70371								0.401318
24.48						0.696397								0.365454
24.5						0.716538								0.391933
24.52						0.71875								0.339969
24.54						0.703403								0.411312
24.56						0.735687								0.387041
24.58						0.707276								0.397749
24.6						0.702339								0.41659
24.62						0.729368								0.397468
24.64						0.735075								0.33563
24.66						0.719917								0.369917
24.68						0.693893								0.464915
24.7						0.713209								0.420091
24.72						0.73364								0.429322
24.74						0.716454								0.34261
24.76						0.728636								0.418913
24.78						0.710665								0.3952
24.8						0.736046								0.356548
24.82						0.723231								0.425986
24.84						0.730965								0.407033
24.86						0.724124								0.344107
24.88						0.695094								0.423121
24.9						0.747374								0.416826
24.92						0.717205								0.4107
24.94						0.735453								0.398805
24.96						0.724861								0.438476
24.98						0.750689								0.392184
25						0.738358								0.432189
25.02						0.710797								0.409584
25.04						0.722683								0.423563
25.06						0.707923								0.365652
25.08						0.724015								0.398667
25.1						0.747534								0.412222
25.12						0.722575								0.42441
25.14						0.721338								0.45486
25.16						0.71966								0.402687
25.18						0.728126								0.39082
25.2						0.698376								0.429882
25.22						0.717773								0.419281
25.24						0.732604								0.435061
25.26						0.70864								0.403602
25.28						0.744645								0.438273
25.3						0.709811								0.424404
25.32						0.728628								0.398739
25.34						0.741498								0.34208
25.36						0.704243								0.45094
25.38						0.711998								0.405355
25.4						0.731665								0.404241
25.42						0.72821								0.433039
25.44						0.74161								0.446882
25.46						0.735234								0.433646
25.48						0.723196								0.380832
25.5						0.723701								0.434112
25.52						0.747593								0.416427
25.54						0.747557								0.404753
25.56						0.747063								0.382091
25.58						0.713676								0.367699
25.6						0.762601								0.393086
25.62						0.736914								0.422537
25.64						0.756707								0.420779
25.66						0.727012								0.413209
25.68						0.714959								0.42086
25.7						0.739177								0.396671
25.72						0.73137								0.41567
25.74						0.71521								0.430525
25.76						0.71385								0.436596
25.78						0.708596								0.448979
25.8						0.701253								0.438182
25.82						0.723515								0.42042
25.84						0.739255								0.444563
25.86						0.714089								0.401071
25.88						0.741128								0.392761
25.9						0.719567								0.431679
25.92						0.731777								0.383948
25.94						0.740005								0.398821
25.96						0.743582								0.428514
25.98						0.736766								0.405777
26						0.719711								0.390364
26.02						0.708393								0.401523
26.04						0.7309								0.41963
26.06						0.728527								0.447886
26.08						0.711362								0.395798
26.1						0.751413								0.423158
26.12						0.748285								0.434443
26.14						0.715818								0.432623
26.16						0.736676								0.429204
26.18						0.71336								0.34303
26.2						0.733483								0.402957
26.22						0.721122								0.422584
26.24						0.701519								0.41355
26.26						0.693667								0.365026
26.28						0.750289								0.376375
26.3						0.725624								0.441199
26.32						0.742032								0.407935
26.34						0.74134								0.442108
26.36						0.742759								0.384355
26.38						0.729238								0.435477
26.4						0.743806								0.459279
26.42						0.751973								0.46655
26.44						0.709694								0.423293
26.46						0.733442								0.407232
26.48						0.716287								0.419689
26.5						0.727615								0.420233
26.52						0.7774								0.428579
26.54						0.720076								0.44612
26.56						0.74218								0.406657
26.58						0.743536								0.48634
26.6						0.725823								0.381684
26.62						0.746836								0.464821
26.64						0.717398								0.396607
26.66						0.699857								0.429303
26.68						0.746021								0.460235
26.7						0.742959								0.373568
26.72						0.712202								0.419614
26.74						0.711015								0.445044
26.76						0.768186								0.425308
26.78						0.749534								0.42229
26.8						0.737146								0.471912
26.82						0.768634								0.435996
26.84						0.780295								0.425728
26.86						0.724368								0.402511
26.88						0.744261								0.352388
26.9						0.704774								0.435606
26.92						0.735177								0.398781
26.94						0.730621								0.42956
26.96						0.779134								0.399186
26.98						0.741242								0.386567
27						0.721229								0.423217
27.02						0.728919								0.435307
27.04						0.735268								0.430595
27.06						0.742753								0.4032
27.08						0.756216								0.435134
27.1						0.735107								0.374341
27.12						0.7658								0.411804
27.14						0.75602								0.417847
27.16						0.738272								0.430985
27.18						0.737047								0.423847
27.2						0.732361								0.459779
27.22						0.74764								0.411322
27.24						0.766412								0.477324
27.26						0.740885								0.401825
27.28						0.721547								0.413838
27.3						0.735394								0.443551
27.32						0.715848								0.429056
27.34						0.713388								0.472591
27.36						0.722515								0.442379
27.38						0.719669								0.339335
27.4						0.749231								0.435472
27.42						0.732092								0.434896
27.44						0.738292								0.43654
27.46						0.723076								0.440773
27.48						0.755421								0.429733
27.5						0.739474								0.395574
27.52						0.733932								0.431893
27.54						0.752239								0.464403
27.56						0.753889								0.447881
27.58						0.723375								0.438679
27.6						0.716918								0.42406
27.62						0.749825								0.43219
27.64						0.717665								0.343606
27.66						0.741016								0.381179
27.68						0.710614								0.396323
27.7						0.733147								0.433747
27.72						0.76905								0.444003
27.74						0.735341								0.426076
27.76						0.750938								0.433911
27.78						0.732532								0.407541
27.8						0.76417								0.420206
27.82						0.745181								0.423807
27.84						0.729842								0.442879
27.86						0.747723								0.425648
27.88						0.757309								0.422474
27.9						0.766582								0.440696
27.92						0.755486								0.424937
27.94						0.758384								0.431072
27.96						0.728112								0.429252
27.98						0.744611								0.420982
28						0.705535								0.444702
28.02						0.742724								0.403682
28.04						0.725509								0.425611
28.06						0.747604								0.441595
28.08						0.748304								0.453782
28.1						0.768095								0.451785
28.12						0.75674								0.420934
28.14						0.745689								0.465534
28.16						0.756312								0.441247
28.18						0.738717								0.464982
28.2						0.770171								0.422948
28.22						0.750699								0.450305
28.24						0.750868								0.441351
28.26						0.725038								0.420853
28.28						0.759839								0.444658
28.3						0.752672								0.428479
28.32						0.725566								0.464428
28.34						0.745595								0.439362
28.36						0.739817								0.486397
28.38						0.756458								0.490659
28.4						0.747939								0.439702
28.42						0.755836								0.448217
28.44						0.731288								0.462008
28.46						0.774412								0.48901
28.48						0.751229								0.410973
28.5						0.73286								0.467168
28.52						0.743315								0.445739
28.54						0.742541								0.474352
28.56						0.746907								0.442253
28.58						0.756282								0.471795
28.6						0.732721								0.430944
28.62						0.773164								0.35479
28.64						0.747106								0.479788
28.66						0.749866								0.444978
28.68						0.736493								0.472941
28.7						0.75124								0.44626
28.72						0.724968								0.418175
28.74						0.731859								0.465074
28.76						0.757992								0.428153
28.78						0.757713								0.411089
28.8						0.754374								0.432865
28.82						0.747912								0.420172
28.84						0.758974								0.424067
28.86						0.761725								0.403518
28.88						0.763005								0.408784
28.9						0.768719								0.486387
28.92						0.740579								0.436065
28.94						0.742379								0.473404
28.96						0.764001								0.419631
28.98						0.718686								0.443441
29						0.756347								0.438304
29.02						0.763373								0.470055
29.04						0.741076								0.477535
29.06						0.731233								0.458724
29.08						0.769237								0.454626
29.1						0.759987								0.439811
29.12						0.758486								0.456241
29.14						0.746779								0.386652
29.16						0.771431								0.481946
29.18						0.758558								0.472583
29.2						0.725735								0.467135
29.22						0.753432								0.451218
29.24						0.764213								0.415589
29.26						0.74158								0.45032
29.28						0.77011								0.439406
29.3						0.754144								0.448427
29.32						0.723425								0.453922
29.34						0.699031								0.388328
29.36						0.761167								0.474338
29.38						0.757713								0.433352
29.4						0.747332								0.380427
29.42						0.75287								0.354581
29.44						0.767281								0.446695
29.46						0.750043								0.43407
29.48						0.773227								0.449946
29.5						0.761201								0.46266
29.52						0.773936								0.450104
29.54						0.770921								0.469321
29.56						0.781094								0.456856
29.58						0.764549								0.417263
29.6						0.758236								0.43799
29.62						0.739383								0.442715
29.64						0.756452								0.455185
29.66						0.743373								0.464913
29.68						0.756434								0.416537
29.7						0.771648								0.509747
29.72						0.760126								0.503412
29.74						0.77726								0.432354
29.76						0.746677								0.43757
29.78						0.771059								0.45586
29.8						0.777002								0.455366
29.82						0.752148								0.455641
29.84						0.760462								0.45015
29.86						0.785125								0.4785
29.88						0.750839								0.446487
29.9						0.76574								0.46807
29.92						0.782609								0.475009
29.94						0.751572								0.426096
29.96						0.799449								0.449504
29.98						0.740214								0.433837
30						0.774206								0.450136
30.02						0.784476								0.50953
30.04						0.729758								0.46826
30.06						0.754534								0.479367
30.08						0.754911								0.457611
30.1						0.765737								0.454519
30.12						0.759679								0.449128
30.14						0.751337								0.449901
30.16						0.760936								0.49489
30.18						0.775429								0.464048
30.2						0.77201								0.502202
30.22						0.767825								0.47727
30.24						0.751352								0.395329
30.26						0.75505								0.389448
30.28						0.766295								0.461768
30.3						0.760255								0.508049
30.32						0.753458								0.458288
30.34						0.76763								0.478671
30.36						0.760316								0.445526
30.38						0.749278								0.427376
30.4						0.786674								0.437235
30.42						0.774482								0.460095
30.44						0.782913								0.445802
30.46						0.744837								0.423248
30.48						0.7696								0.393927
30.5						0.767898								0.445063
30.52						0.785442								0.516607
30.54						0.750345								0.446553
30.56						0.761141								0.455057
30.58						0.748201								0.427715
30.6						0.78841								0.463377
30.62						0.779195								0.415301
30.64						0.762138								0.466483
30.66						0.763671								0.441223
30.68						0.762754								0.456705
30.7						0.77606								0.477922
30.72						0.773547								0.429939
30.74						0.765962								0.454677
30.76						0.757067								0.440714
30.78						0.761302								0.505753
30.8						0.77107								0.463719
30.82						0.778289								0.444701
30.84						0.761007								0.464905
30.86						0.76368								0.505559
30.88						0.766429								0.428748
30.9						0.750382								0.399865
30.92						0.757605								0.419655
30.94						0.770177								0.484643
30.96						0.782091								0.441445
30.98						0.730038								0.49012
31						0.746106								0.492723
31.02						0.757727								0.495862
31.04						0.748844								0.441359
31.06						0.748687								0.406171
31.08						0.785516								0.491024
31.1						0.765453								0.413294
31.12						0.771048								0.510354
31.14						0.784713								0.462921
31.16						0.790659								0.458757
31.18						0.762807								0.468523
31.2						0.769155								0.452924
31.22						0.768832								0.512163
31.24						0.758212								0.475951
31.26						0.782757								0.42093
31.28						0.757029								0.43988
31.3						0.77394								0.444888
31.32						0.751275								0.511385
31.34						0.771997								0.453296
31.36						0.776879								0.472538
31.38						0.76428								0.47095
31.4						0.762754								0.461807
31.42						0.74089								0.482271
31.44						0.746574								0.42711
31.46						0.810299								0.479066
31.48						0.796394								0.416512
31.5						0.775401								0.50619
31.52						0.777832								0.410748
31.54						0.761286								0.464381
31.56						0.788554								0.445492
31.58						0.760429								0.465978
31.6						0.773436								0.490276
31.62						0.771676								0.449412
31.64						0.777901								0.463295
31.66						0.768613								0.481267
31.68						0.761092								0.462598
31.7						0.764861								0.463094
31.72						0.779584								0.488281
31.74						0.775878								0.455904
31.76						0.776554								0.48069
31.78						0.78131								0.458127
31.8						0.772108								0.447525
31.82						0.768286								0.484036
31.84						0.77189								0.459741
31.86						0.74241								0.450566
31.88						0.780137								0.459946
31.9						0.798284								0.461882
31.92						0.770481								0.466547
31.94						0.762516								0.512427
31.96						0.773298								0.495146
31.98						0.782376								0.474903
32						0.777278								0.416475
32.02						0.776065								0.447716
32.04						0.764771								0.465957
32.06						0.766542								0.453173
32.08						0.769514								0.445181
32.1						0.785021								0.495512
32.12						0.773791								0.472819
32.14						0.772206								0.414587
32.16						0.762552								0.471271
32.18						0.757354								0.443943
32.2						0.783686								0.456124
32.22						0.776857								0.470004
32.24						0.776228								0.452319
32.26						0.758785								0.444828
32.28						0.787259								0.46475
32.3						0.780349								0.464549
32.32						0.784297								0.424823
32.34						0.789197								0.49439
32.36						0.781116								0.469661
32.38						0.781983								0.437058
32.4						0.772454								0.484483
32.42						0.753904								0.454417
32.44						0.781122								0.427572
32.46						0.749582								0.465341
32.48						0.726386								0.484194
32.5						0.798063								0.46545
32.52						0.769992								0.434363
32.54						0.770797								0.469914
32.56						0.777832								0.49803
32.58						0.812582								0.472482
32.6						0.777885								0.485703
32.62						0.770193								0.470106
32.64						0.763497								0.490496
32.66						0.782478								0.409539
32.68						0.757365								0.499719
32.7						0.789239								0.491606
32.72						0.778765								0.460849
32.74						0.773167								0.471896
32.76						0.777312								0.467976
32.78						0.780208								0.468613
32.8						0.778479								0.460733
32.82						0.768541								0.477437
32.84						0.768726								0.449373
32.86						0.780263								0.481522
32.88						0.773319								0.476076
32.9						0.769903								0.455906
32.92						0.824511								0.466063
32.94						0.791631								0.480741
32.96						0.78503								0.389396
32.98						0.766957								0.451784
33						0.791546								0.510617
33.02						0.797032								0.443299
33.04						0.773383								0.473925
33.06						0.759719								0.459654
33.08						0.785179								0.459983
33.1						0.783731								0.446237
33.12						0.816053								0.480558
33.14						0.777466								0.435674
33.16						0.796923								0.435593
33.18						0.782262								0.456324
33.2						0.793582								0.456374
33.22						0.793798								0.52646
33.24						0.760964								0.482216
33.26						0.788658								0.465304
33.28						0.805701								0.488735
33.3						0.786182								0.45406
33.32						0.795968								0.476734
33.34						0.796248								0.480659
33.36						0.805299								0.503037
33.38						0.792547								0.446033
33.4						0.764132								0.476894
33.42						0.781576								0.473659
33.44						0.755683								0.494808
33.46						0.755917								0.505673
33.48						0.800001								0.485671
33.5						0.772339								0.477847
33.52						0.801008								0.440809
33.54						0.74893								0.482342
33.56						0.763912								0.450138
33.58						0.82472								0.482542
33.6						0.790545								0.484881
33.62						0.788418								0.474346
33.64						0.793599								0.459936
33.66						0.781859								0.460143
33.68						0.768709								0.465868
33.7						0.772157								0.426675
33.72						0.797403								0.442102
33.74						0.787824								0.474979
33.76						0.800226								0.452819
33.78						0.763123								0.49293
33.8						0.774193								0.507482
33.82						0.760925								0.47257
33.84						0.782366								0.499234
33.86						0.791407								0.453169
33.88						0.780197								0.454539
33.9						0.790114								0.459215
33.92						0.779414								0.493264
33.94						0.771109								0.452431
33.96						0.772406								0.468125
33.98						0.797549								0.496239
34						0.807013								0.482229
34.02						0.7846								0.452107
34.04						0.776319								0.513881
34.06						0.767911								0.484005
34.08						0.78872								0.472038
34.1						0.758211								0.462595
34.12						0.801765								0.464048
34.14						0.840506								0.498481
34.16						0.77233								0.497162
34.18						0.779817								0.49607
34.2						0.775346								0.508304
34.22						0.780335								0.489038
34.24						0.806326								0.450791
34.26						0.780899								0.470966
34.28						0.798146								0.445535
34.3						0.772345								0.483255
34.32						0.797247								0.538823
34.34						0.757784								0.491032
34.36						0.769978								0.473203
34.38						0.816154								0.497112
34.4						0.773298								0.49419
34.42						0.790696								0.50439
34.44						0.805884								0.473645
34.46						0.77526								0.472339
34.48						0.766997								0.4551
34.5						0.771013								0.461507
34.52						0.810701								0.473337
34.54						0.807581								0.464449
34.56						0.775018								0.460893
34.58						0.81718								0.464476
34.6						0.769527								0.475106
34.62						0.808591								0.47005
34.64						0.753023								0.489648
34.66						0.774041								0.514271
34.68						0.816846								0.53439
34.7						0.780346								0.492061
34.72						0.770843								0.519829
34.74						0.794286								0.499912
34.76						0.792966								0.512106
34.78						0.800698								0.45216
34.8						0.807695								0.443283
34.82						0.77823								0.509813
34.84						0.794401								0.465294
34.86						0.820347								0.489867
34.88						0.814677								0.518113
34.9						0.800029								0.470302
34.92						0.801359								0.494965
34.94						0.79915								0.454095
34.96						0.775972								0.515336
34.98						0.798335								0.491851
35						0.798679								0.500471
35.02						0.83294								0.491038
35.04						0.816328								0.464801
35.06						0.805306								0.490218
35.08						0.777379								0.500108
35.1						0.768937								0.506657
35.12						0.776777								0.496668
35.14						0.777331								0.504144
35.16						0.794888								0.546139
35.18						0.800561								0.524776
35.2						0.774293								0.548731
35.22						0.783253								0.486836
35.24						0.805525								0.504079
35.26						0.780129								0.476388
35.28						0.766124								0.496621
35.3						0.791922								0.540011
35.32						0.813505								0.503115
35.34						0.759117								0.517844
35.36						0.817541								0.480665
35.38						0.804828								0.497776
35.4						0.783861								0.537496
35.42						0.818303								0.503655
35.44						0.807785								0.507626
35.46						0.801014								0.53468
35.48						0.790091								0.552225
35.5						0.791764								0.516047
35.52						0.80717								0.468056
35.54						0.803225								0.511745
35.56						0.796505								0.503002
35.58						0.805875								0.539537
35.6						0.798777								0.494988
35.62						0.812818								0.483053
35.64						0.814839								0.485473
35.66						0.797175								0.534815
35.68						0.760584								0.482263
35.7						0.781375								0.496713
35.72						0.794286								0.503125
35.74						0.784671								0.517659
35.76						0.768895								0.500782
35.78						0.806756								0.51869
35.8						0.797633								0.480257
35.82						0.761498								0.510234
35.84						0.781402								0.50764
35.86						0.797772								0.487614
35.88						0.791045								0.510488
35.9						0.783146								0.485471
35.92						0.799723								0.539701
35.94						0.779436								0.523734
35.96						0.82259								0.472309
35.98						0.783465								0.530198
36						0.792894								0.519121
36.02						0.821314
36.04						0.809906								0.490545
36.06						0.792197								0.507587
36.08						0.785702								0.454532
36.1						0.798941								0.499868
36.12						0.807922								0.526826
36.14						0.808307								0.495901
36.16						0.823424								0.549307
36.18						0.810739								0.451753
36.2						0.812858								0.499543
36.22						0.768688								0.505842
36.24						0.777028								0.48279
36.26						0.798479								0.496758
36.28						0.803019								0.518097
36.3						0.793212								0.491167
36.32						0.779189								0.436125
36.34						0.81309								0.532067
36.36						0.808101								0.497171
36.38						0.784098								0.504174
36.4						0.808269								0.484826
36.42						0.776063								0.468946
36.44						0.815914								0.498777
36.46						0.805075								0.510782
36.48						0.768254								0.487674
36.5						0.808315								0.504596
36.52						0.802096								0.510508
36.54						0.795008								0.487366
36.56						0.77403								0.506598
36.58						0.813284								0.481871
36.6						0.804253								0.519517
36.62						0.779956								0.483228
36.64						0.80102								0.458169
36.66						0.807072								0.497312
36.68						0.792464								0.472366
36.7						0.774298								0.497516
36.72						0.795349								0.507279
36.74						0.769246								0.499654
36.76						0.814481								0.486382
36.78						0.809132								0.490579
36.8						0.784025								0.454752
36.82						0.798079								0.497149
36.84						0.790616								0.509067
36.86						0.777704								0.498286
36.88						0.819226								0.486003
36.9						0.804269								0.479031
36.92						0.820539								0.562858
36.94						0.779887								0.508331
36.96						0.796445								0.512798
36.98						0.815646								0.526792
37						0.783146								0.538042
37.02						0.810634								0.53354
37.04						0.787516								0.459537
37.06						0.812657								0.514798
37.08						0.794514								0.531357
37.1						0.794811								0.499719
37.12						0.812018								0.460976
37.14						0.79034								0.514109
37.16						0.806316								0.501383
37.18						0.789808								0.530664
37.2						0.787927								0.504633
37.22						0.766909								0.485958
37.24						0.775231								0.490414
37.26						0.780809								0.516326
37.28						0.804494								0.506822
37.3						0.800864								0.496298
37.32						0.799998								0.491125
37.34						0.810058								0.519411
37.36						0.829846								0.484767
37.38						0.777508								0.524076
37.4						0.809994								0.476475
37.42						0.843166								0.499284
37.44						0.828376								0.505808
37.46						0.799558								0.505173
37.48						0.806698								0.518083
37.5						0.793195								0.501912
37.52						0.786525								0.506892
37.54						0.773735								0.54234
37.56						0.822469								0.541959
37.58						0.798914								0.459857
37.6						0.80835								0.507991
37.62						0.810861								0.521735
37.64						0.838532								0.533423
37.66						0.79476								0.488146
37.68						0.814578								0.537707
37.7						0.828169								0.514492
37.72						0.814804								0.481521
37.74						0.827665								0.478513
37.76						0.825937								0.511669
37.78						0.785826								0.506578
37.8						0.798948								0.549849
37.82						0.814093								0.539389
37.84						0.82017								0.4697
37.86						0.823047								0.540785
37.88						0.807173								0.516281
37.9						0.798753								0.542784
37.92						0.797484								0.496949
37.94						0.818291								0.515753
37.96						0.817852								0.511885
37.98						0.792416								0.504211
38						0.81711								0.47945
38.02						0.841196								0.533267
38.04						0.825004								0.500081
38.06						0.827835								0.478482
38.08						0.79237								0.543494
38.1						0.816387								0.493041
38.12						0.785211								0.48189
38.14						0.792519								0.493699
38.16						0.808376								0.542169
38.18						0.820051								0.536585
38.2						0.794133								0.50138
38.22						0.805267								0.511921
38.24						0.81096								0.47884
38.26						0.807035								0.537161
38.28						0.798062								0.514037
38.3						0.808976								0.455233
38.32						0.842023								0.502863
38.34						0.790823
38.36						0.804399								0.52476
38.38						0.807207								0.497604
38.4						0.787479								0.474454
38.42						0.795964
38.44						0.824097								0.472234
38.46						0.819616								0.502855
38.48						0.786465								0.484919
38.5						0.780242								0.452283
38.52						0.810784								0.48813
38.54						0.778709								0.498838
38.56						0.800385								0.464325
38.58						0.830428								0.440544
38.6						0.799472
38.62						0.813088								0.412773
38.64						0.808235
38.66						0.772245
38.68						0.811177
38.7						0.791224
38.72						0.813306
38.74						0.801267
38.76						0.829799
38.78						0.808512
38.8						0.818972
38.82						0.809489
38.84						0.791955
38.86						0.828764
38.88						0.829054
38.9						0.796472
38.92						0.797671
38.94						0.792323
38.96						0.820613
38.98						0.805795
39						0.818127
39.02						0.846328
39.04						0.825029
39.06						0.792023
39.08						0.804866
39.1						0.797941
39.12						0.830306
39.14						0.81876
39.16						0.798335
39.18						0.795037
39.2						0.796068
39.22						0.814862
39.24						0.816157
39.26						0.826105
39.28						0.823801
39.3						0.822655
39.32						0.793188
39.34						0.788382
39.36						0.852389
39.38						0.801783
39.4						0.799975
39.42						0.800595
39.44						0.77102
39.46						0.799921
39.48						0.788958
39.5						0.809056
39.52						0.825832
39.54						0.826079
39.56						0.815354
39.58						0.815274
39.6						0.790322
39.62						0.793668
39.64						0.829861
39.66						0.837745
39.68						0.809586
39.7						0.827653
39.72						0.814461
39.74						0.812792
39.76						0.823034
39.78						0.808777
39.8						0.823874
39.82						0.798606
39.84						0.82862
39.86						0.797398
39.88						0.802149
39.9						0.829129
39.92						0.838642
39.94						0.805512
39.96						0.83986
[truncated: 1,034 more rows]
