# Supplementary material for: Deformation under flow and morphological recovery of cancer cells
Source: Royal Society of Chemistry journal article supplement (doi:10.1039/d4lc00246f), 2024-01-01
Supplement: d4lc00246f4.xlsx [file d4lc00246f4.xlsx]

## Sheet: MCFs
time	Normalized strain
	220517s1t1	220517s2t1	220517s2t2	220517s3t1	220517s3t3	220517s3t6	220518s2t4	220518s2t5	220524s1t1	220524s1t3	220524s2t1	220524s3t3	220609s1t1	220609s1t5	220609s2t1	220609s2t2	220609s2t3	220609s2t5	220609s2t8	220609s2t9	220609s2t11	220609s2t12*	220609s3t1	220609s3t2	220609s3t4	220609s3t5
0	1.69623			1.33771	1.04176	1.10192		1.06779	1.41708	1.29841		0.799013	0.445418	0.862171		0.374696	0.449331	1.28275			0.568826	1.31531	1.47478	0.869594		1.10027
0.02					0.971201						0.294458		0.598403									1.36054	0.592077	0.600154	0.359221
0.04	1.07762	0.684814	1.1826	0.397707	0.65057			0.403513	0.872969		0.340214		0.509863	0.741375	0.434307			1.16483	0.241403			1.70527	0.559949		0.505042	0.484688
0.06	0.981884	0.661293		0.149286	0.604942			0.639764			0.360865	1.01801	0.386465		0.386397	0.570623		0.698941	0.171839	0.910005		0.620249	0.45241		0.611857	0.49338
0.08	1.03974	0.640049		0.18674	0.506225	0.562045		0.219502	0.41132	0.857071	0.315135		0.25623		0.297243	0.654545		0.122604	0.150104			0.919764	0.383562		0.655639	0.407809
0.1	0.962489	0.624331		0.050897	0.577525	0.382506		0.2626	0.655133	0.811815	0.342945	0.711164	0.443084		0.29108	0.540964			0.216224			0.436227	0.316169	0.358611	0.55454	0.573509
0.12	0.959301	0.664403		-0.0454386	0.598487	0.313489		0.294573	0.447286	0.630235	0.32925	0.73595	0.366079	0.438721	0.193253	0.797411			0.0745487			0.493764	0.322009	0.275559	0.519801	0.544437
0.14	0.857189	0.550872		0.0900714	0.523854	0.262732			0.312707	0.395388	0.283581	0.495384	0.345553	0.405643	0.213269	0.465787	0.246663		0.106788			0.659262	0.284363	0.28318	0.475592	0.55558
0.16	0.894726	0.574378		-0.00597413	0.517513	0.263594			0.363754	0.404118	0.268777	0.512435	0.33769	0.297286	0.208151		0.177889	-0.0639057	0.119739			0.534681	0.297139	0.254009	0.461828	0.522444
0.18	0.839162	0.546245		0.0257421	0.489838	0.166113			0.446523	0.401845	0.329566	0.367482	0.267292	0.365972	0.215026	0.631711	0.134858	-0.02265	0.157458			0.39515	0.330333	0.253722	0.545198	0.535229
0.2	0.702793	0.554383	0.44587	0.101623	0.529584	0.178961		0.0311559	0.364538	0.425611	0.28024	0.32921	0.236754	0.307593	0.185637	0.568299	0.164955	0.179027	0.133615			0.643989	0.239501	0.23281	0.487784	0.507696
0.22	0.764922	0.52427	0.404922	-0.0103779	0.522001	0.167841		0.027567	0.336553	0.4733	0.301968	0.460846	0.250812	0.281893	0.159418	0.524987	0.347955	0.0709313	0.167531			0.447979	0.226812	0.208926	0.470636	0.539663
0.24	0.639863	0.57047	0.326485	0.0535403	0.417287	0.143181		0.0277168	0.320043	0.406384	0.290385	0.53233	0.195733	0.286368	0.183555	0.637626	0.129815	-0.114117				0.553891	0.179903	0.219368	0.401729	0.503894
0.26	0.576344	0.547405	0.307895	0.0420943	0.437865	0.178334		0.0211129	0.306151	0.305183	0.279367	0.458583	0.218101	0.279997	0.143003	0.257183	0.162174	0.0937235				0.318195	0.178422	0.195476	0.485171	0.507848
0.28	0.58942	0.546258	0.299386	-0.0427177	0.470608	0.367457		0.0105517	0.304412	0.236925	0.246113	0.46378	0.237359	0.225431	0.18654	0.376995	0.189381	-0.0575302	0.0112796			0.370657	0.150366	0.195402	0.498637	0.511009
0.3	0.612821	0.512182	0.364385	-0.0202947	0.457323	0.169384		0.00741438	0.34533	0.311421	0.253031	0.329286	0.192013	0.234765	0.155536	0.579071	0.162808	-0.0575513	0.0857842			0.328387	0.149943	0.213421	0.5623	0.512925
0.32	0.66304	0.524124	0.370795	-0.0392691	0.456416	0.233102		0.0191148	0.321444	0.335572	0.230426	0.210216	0.216058	0.284559	0.141793	0.2904	0.188644	-0.0612288	0.0257244			0.133102	0.111012	0.20057	0.563785	0.512749
0.34	0.6626	0.492808	0.355619	-0.109364	0.434267	0.241251		-0.00822639	0.325414	0.271206	0.277868	0.0900965	0.182028	0.230425	0.198709	0.204129	0.174421	-0.103648	0.0226636			0.108384	0.0969725	0.193675	0.496746	0.560072
0.36	0.667722	0.51506	0.326796	-0.00690815	0.477594	0.172208		0.00868671	0.307599	0.290532	0.263955	0.115333	0.110048	0.248487	0.075603	0.310622	0.210623	0.0389521	0.0145925			0.121656	0.0949651	0.176952	0.463897	0.495491
0.38	0.600326	0.4305	0.355664	0.0115995	0.525021	0.248897		0.014512	0.253702	0.277543	0.288044	0.100951	0.203475	0.257983	0.115513	0.28124	0.267172	0.0685787	0.00908753	0.615294		0.0680516	0.147969	0.182103	0.413564	0.535373
0.4	0.655564	0.503552	0.338627	-0.0903965	0.469	0.203091		0.0285454	0.270708	0.324539	0.27352	0.168961	0.145503	0.21644	0.100695	0.268738	0.163854	-0.0291222	0.0228504	0.680056		0.121479	0.0969878	0.191203	0.478204	0.49302
0.42	0.535317	0.473109	0.367827	-0.098639	0.433898	0.142589		0.0138222	0.253268	0.258189	0.251688	0.0929352	0.198864	0.227165	0.0956565	0.426928	0.201917	-0.0440202	0.0191161	0.593309		0.126917	0.103019	0.201681	0.358393	0.471782
0.44	0.656202	0.477402	0.332849	-0.0523104	0.466475	0.229081		-0.0112908	0.284057	0.252481	0.250861	0.133816	0.141857	0.202405	0.11524	0.390715	0.168199	0.0131318	0.0410528	0.678543		0.195915	0.0836621	0.14629	0.32228	0.446307
0.46	0.600904	0.501715	0.351184	-0.17597	0.39159	0.159302		0.0184157	0.28462	0.255256	0.267749	0.0773481	0.133461	0.200853	0.137262	0.340706	0.100167	-0.0330787	0.0512132	0.535791		0.0848233	0.0793483	0.136505	0.529018	0.529212
0.48	0.588914	0.469665	0.344419	-0.188534	0.425358	0.163702		-0.0108897	0.275205	0.238311	0.288448	0.0977341	0.157488	0.188562	0.0618388	0.130487	0.116467	-0.11145	-0.0253911	0.529566		0.0403014	0.0528992	0.220687	0.46663	0.367068
0.5	0.569669	0.467919	0.312759	-0.0822763	0.47239	0.135798		8.08646e-05	0.280498	0.254811	0.253413	0.144586	0.117362	0.165316	0.121484	0.124877	0.230632	-0.0733972	0.000968745	0.571358		0.051933	0.0628533	0.126386	0.435151	0.446759
0.52	0.52247	0.425944	0.356958	-0.048196	0.405394	0.243167		0.0424512	0.263529	0.198588	0.257656	0.138836	0.162743	0.201285	0.080132	0.251956	0.134612	-0.115733	0.0251201	0.542445		0.131898	0.00647805	0.20338	0.366643	0.478813
0.54	0.538817	0.4232	0.336056	-0.0304091	0.435823	0.134617		0.00382671	0.24476	0.225215	0.247072	0.103311	0.115803	0.159699	0.1584	0.301411	0.118926	0.0761758	0.0348018	0.518754		0.0914029	0.0765371	0.177384	0.420007	0.511455
0.56	0.524667	0.404456	0.313819	-0.0436728	0.437462	0.252867		0.0148233	0.250901	0.200526	0.213929	0.114346	0.131618	0.161377	0.0929043	0.277782	0.187775	0.223274	0.0246895	0.491525		0.0546618	0.0574257	0.162957	0.428557	0.510467
0.58	0.532858	0.429647	0.295242	-0.00822319	0.487951	0.190412		0.0086495	0.24895	0.196452	0.24162	0.141125	0.117033	0.150867	0.0908299	0.332787	0.163634	0.0156208	0.0060388	0.397279		0.0383237	0.0308827	0.181671	0.500639	0.471094
0.6	0.495692	0.399701	0.339021	-0.1284	0.407619	0.174496		-0.0245665	0.259812	0.22075	0.231246	0.108731	0.128643	0.143796	0.0940796	0.393553	0.0877144	0.0122655	0.0321792	0.438806		0.0243863	0.0552506	0.139765	0.357935	0.475422
0.62	0.540534	0.442487	0.318146	-0.0825074	0.395589	0.195287		-0.0155974	0.259077	0.191407	0.241294	0.114128	0.143032	0.149995	0.0382906	0.169318	0.177966	0.0236349	0.0195132	0.499686		0.168155	0.0624985	0.210949	0.46296	0.362584
0.64	0.507723	0.481656	0.302002	-0.16799	0.393289	0.241659		0.00197251	0.230932	0.246912	0.266545	0.0760266	0.129835	0.188298	0.0772222	0.350028	0.121531	0.143013	-0.0138848	0.459002		0.0779693	-0.00612239	0.145906	0.306555	0.435278
0.66	0.505017	0.426434	0.304333	-0.109634	0.492711	0.239278		-0.00622275	0.242672	0.194015	0.29456	0.101457	0.0645323	0.171075	0.052383	0.350988	0.140782	-0.192399	0.0161321	0.450251		0.122001	0.0576267	0.106525	0.437181	0.375875
0.68	0.499766	0.377364	0.321959	-0.0458363	0.449588	0.257206		0.0121731	0.225849	0.178654	0.231296	0.0758495	0.137071	0.112273	0.0620294	0.121757	0.0885083	-0.0745596	0.0117492	0.408209		0.0862644	-0.0148126	0.176238	0.29862	0.416329
0.7	0.45713	0.3488	0.315495	-0.144893	0.354152	0.229223		-0.0285495	0.216463	0.169315	0.253876	0.0655205	0.116541	0.171054	0.0546933	0.413135	0.0802421	-0.00770381	-0.00300093	0.368234		0.0903636	0.0535809	0.211559	0.312538	0.413724
0.72	0.480832	0.365751	0.334393	-0.0717368	0.391053	0.307074		0.0157717	0.227256	0.182389	0.217526	0.10785	0.0864315	0.133756	0.0910347	0.0171085	0.0584046	-0.191261	0.0671964	0.463376		0.167263	0.0203465	0.140119	0.40063	0.386911
0.74	0.528753	0.379823	0.304071	-0.173338	0.373535	0.232652		0.0052182	0.210403	0.182455	0.278184	0.077507	0.105703	0.0854117	0.0745174	0.362114	0.0707672	0.145861	0.0349247	0.3606		0.0338492	0.0217158	0.185673	0.343189	0.362229
0.76	0.554753	0.414178	0.28126	-0.131418	0.352422	0.219384		0.0110868	0.23978	0.178826	0.226528	0.0790776	0.11598	0.0835396	0.0507457	0.305323	0.0917776	-0.0392329	0.0216028	0.313212		0.035293	0.0375378	0.218526	0.164087	0.419132
0.78	0.459626	0.405999	0.286542	-0.0333114	0.36957	0.20845		-0.0236075	0.194726	0.167725	0.21978	-0.00106923	0.0822934	0.176818	0.0741654	0.299602	0.0946052	0.000342563	0.0310416	0.346722		0.192907	-0.0264384	0.191566	0.28553	0.357819
0.8	0.464105	0.377102	0.302162	-0.120521	0.427736	0.161056		-0.0137823	0.224117	0.115549	0.220661	0.0522554	0.101743	0.12652	0.0424133	0.294419	0.0449778	-0.108237	0.0445656	0.441127		0.0568287	-0.0253719	0.147822	0.169274	0.347601
0.82	0.489989	0.39753	0.308654	-0.0467504	0.301535	0.258607		0.0145219	0.196463	0.153494	0.233646	-0.00861813	0.207645	0.129389	0.0357473	0.335669	0.0265034	-0.110738	0.0603175	0.391376		0.0707866	0.0604548	0.161159	0.334802	0.399943
0.84	0.533897	0.353215	0.290295	-0.192041	0.434684	0.144438		-0.00864122	0.191932	0.170134	0.247346	0.0433101	0.106812	0.150755	0.0893008	0.300819	0.12109	0.126799	0.0294949	0.439648		0.0465786	0.00649105	0.210858	0.354813	0.320282
0.86	0.389911	0.357484	0.314135	-0.17641	0.40224	0.179723		0.00938821	0.163173	0.16622	0.26501	0.108856	0.094212	0.158745	0.0303376	0.162685	-0.0484836	-0.0388605	0.00486655	0.400762		0.00981905	0.0299144	0.248389	0.337164	0.319329
0.88	0.413571	0.374201	0.306191	-0.0923495	0.485206	0.230268		0.00289305	0.175644	0.170873	0.240109	-0.0226879	0.09577	0.15931	0.0552915	0.354069	0.10926	-0.0885881	-0.0153822	0.456372		0.115796	0.00490449	0.198222	0.23838	0.372916
0.9	0.479659	0.367732	0.314818	-0.25753	0.44786	0.20379		-0.000643179	0.185594	0.169483	0.246086	0.0630259	0.109375	0.0972893	0.0458169	-0.00225538	0.126888	-0.0394699	0.016967	0.52669		0.0490288	-0.000795809	0.199352	0.281472	0.336269
0.92	0.479247	0.368653	0.281874	-0.0318271	0.386086	0.226367		-0.00896188	0.181431	0.148467	0.254798	0.0152686	0.111473	0.130702	0.0544831	-0.050313	0.0929527	-0.101779	0.0248612	0.459633		0.119639	0.0168638	0.151389	0.253824	0.414378
0.94	0.427463	0.357522	0.294428		0.345293	0.186933		-0.0080044	0.18429	0.135729	0.22516	0.0711418	0.0959884	0.112164	0.0574475	0.191019	0.0115144	0.23301	0.0144783	0.375954		0.0765549	-0.0130843	0.158661	0.212476	0.304315
0.96	0.447006	0.333121	0.271962		0.495105	0.212876		0.0108705	0.180211	0.155777	0.208181	0.00149446	0.143211	0.129925	0.0203512	0.19197	0.0139123	-0.07511	0.0476553	0.324463		0.0214699	0.0177819	0.180033	0.413743	0.365481
0.98	0.454481	0.383665	0.334594		0.414066	0.151757		-0.00702011	0.184298	0.152321	0.244892	0.024334	0.110868	0.0982672	0.0171182	0.133731	0.0827838	0.137571	0.0144937	0.316093		0.0251032	-0.037268	0.17158	0.364469	0.400415
1	0.423821	0.3857	0.280275		0.278355	0.225433		-0.0182957	0.190908	0.149968	0.230288	0.036176	0.111145	0.108273	0.0370314	0.198185	0.0601408	-0.0637826	0.0207233	0.373983		0.107123	-0.0109804	0.16039	0.302308	0.334391
1.02	0.483504	0.33364	0.304123		0.429672	0.125314		-0.0187531	0.192221	0.155187	0.207003	0.0168661	0.0996408	0.128117	0.0325008	0.305573	0.0859585	-0.0178639	0.0352214	0.256444		0.0831786	-0.00318732	0.135169	0.238335	0.415447
1.04	0.475536	0.335837	0.26727		0.368864	0.265476		-0.00038079	0.181994	0.137562	0.24762	0.0339647	0.096305	0.096751	0.0386257	0.0550256	0.0473675	0.206805	0.00750581	0.332424		0.0489733	0.0282697	0.136444	0.313067	0.35028
1.06	0.442716	0.30913	0.29248		0.371169	0.133499		-0.0164493	0.150504	0.136296	0.202592	0.030825	0.11298	0.094053	0.0209597	0.268026	-0.00892355	-0.0076078	0.060142	0.283349		0.0242507	0.0378858	0.194903	0.352208	0.396086
1.08	0.479293	0.335317	0.301686		0.322954	0.0829231		-0.00856116	0.140857	0.142257	0.245871	0.0125309	0.0973788	0.0686072	0.0581345	0.256469	0.0531588	0.219142	0.0544743	0.340838		0.164846	0.0165688	0.189603	0.324973	0.364895
1.1	0.435327	0.342847	0.276777		0.372061	0.240277		-0.00159249	0.145765	0.144	0.190427	-0.0268659	0.0828492	0.127079	0.0476826	0.00334146	0.0691088	-0.0648798	-0.000632885	0.327238		-0.00301522	0.0261915	0.192434	0.31441	0.32327
1.12	0.45917	0.29224	0.306331		0.357063	0.216		-0.00431404	0.15522	0.152343	0.259669	-0.00542116	0.090154	0.125512	0.01939	0.138226	0.109842	0.00733601	0.0199481	0.258011		0.12863	0.0513378	0.184859	0.197768	0.379445
1.14	0.4045	0.30247	0.320969		0.367978	0.181466		-0.0359553	0.14193	0.114011	0.214083	0.0450448	0.117182	0.0982628	0.0489288	0.384069	0.0147866	0.159085	0.0081785	0.289665		0.01506	0.0148296	0.202883	0.159855	0.336648
1.16	0.373152	0.294929	0.27473	-0.0134386	0.355564	0.224762		0.0207117	0.146772	0.0906117	0.225646	0.0912412	0.0728489	0.0689424	0.0523856	0.141467	0.0399648	0.186589	0.00170659	0.361663		0.0596419	-0.010278	0.132398	0.171653	0.314755
1.18	0.463708	0.335923	0.258017	-0.19817	0.35853	0.105454		0.0171806	0.14565	0.176006	0.247705	0.0544873	0.0952666	0.0955566	0.0400629	-0.12392	0.0471069	0.172363	0.062888	0.307285		0.0601368	-0.00667941	0.123688	0.190685	0.380249
1.2	0.419736	0.258287	0.319723	0.0405436	0.32654	0.138567		-0.00902374	0.149515	0.13269	0.192865	-0.00928022	0.106894	0.113632	0.0355077	0.150081	0.0668934	1.14938e-05	0.0166331	0.200643		0.0356917	0.0658249	0.108398	0.158447	0.393869
1.22	0.473125	0.342424	0.286931	0.0629864	0.348639	0.157652		-0.00643434	0.133717	0.144884	0.199959	-0.0154909	0.124241	0.0531415	0.0280531	0.201362	0.098117	0.146304	0.040648	0.226554	0.336423	0.0406729	0.0743918	0.18457	0.145583	0.330547
1.24	0.373626	0.336846	0.310467	-0.0763406	0.423844	0.261761		0.00857902	0.116138	0.15415	0.221466	0.0321613	0.170284	0.0514983	0.0299272	0.118827	0.139386	-0.0159172	0.030279	0.224306	0.270764	-0.00600237	0.0308507	0.10324	0.141524	0.354786
1.26	0.399088	0.276112	0.294275	-0.0292393	0.306277	0.12628	0.104402	-0.00792563	0.143012	0.1305	0.207493	-0.0113928	0.0773552	0.103236	0.000942748	0.232564	0.0113096	-0.0201776	0.0209648	0.169421	0.290747	0.164912	-0.0260392	0.240636	0.204775	0.361783
1.28	0.458234	0.304938	0.268696	-0.0288041	0.36633	0.180786	0.0165253	-0.00924681	0.13964	0.129492	0.198889	0.0369341	0.0933298	0.0762258	0.0442951	0.384331	-0.0352957	0.0362726	0.0100599	0.231828	0.199249	0.0556065	0.00348105	0.161493	0.155352	0.355105
1.3	0.384857	0.322837	0.296579	-0.166008	0.355392	0.23533	0.0468866	0.0109219	0.142979	0.136599	0.192844	0.0220942	0.0668356	0.0554478	0.045866	0.350913	0.104718	0.058234	0.00347425	0.262458	0.203705	0.0227042	0.0258261	0.161915	0.138118	0.362671
1.32	0.393893	0.255068	0.271635	-0.105736	0.339562	0.114254	0.0897176	0.00149232	0.132611	0.129959	0.194131	0.0266943	0.0724426	0.0538459	0.0539045	0.342817	0.0924628	0.00704921	0.00718534	0.186255	0.291535	0.00883189	0.00615841	0.142849	0.18532	0.331532
1.34	0.397615	0.340352	0.274081	-0.00300607	0.372364	0.177521	0.0616357	0.00171861	0.135114	0.129618	0.234386	0.0226139	0.0919941	0.0849711	0.0164592	0.00416631	0.0300987	-0.0145791	0.0234188	0.200692	0.304025	0.0811954	0.00336448	0.0974407	0.180339	0.353396
1.36	0.497418	0.301181	0.277351	-0.0033909	0.32848	0.0390182	0.0428856	0.0190119	0.139656	0.122848	0.207128	-0.0100155	0.0466369	0.0461962	-0.00335198	0.427771	0.0802031	-0.00229673	0.0213004	0.202041	0.305003	-0.0221032	0.0355915	0.158509	0.139308	0.366857
1.38	0.365377	0.273916	0.326299	0.0215871	0.403377	0.205853	0.0952656	0.0217497	0.13993	0.12932	0.176329	-0.00417696	0.0588139	0.068382	0.0244424	0.239022	-0.0113612	-0.150565	0.0393215	0.24886	0.263034	-0.00341093	-0.0384104	0.218949	0.146658	0.312203
1.4	0.358646	0.311208	0.257854	-0.00180177	0.349459	0.19758	0.100132	0.0263177	0.147085	0.123913	0.188673	0.0166933	0.0555496	0.0578232	0.039708	0.289142	0.0334151	0.0680085	0.00344076	0.129608	0.273816	0.174666	0.0226414	0.145836	0.181811	0.335963
1.42	0.400591	0.271204	0.263686	-0.144622	0.315086	0.113087	0.0738414	0.0368697	0.136286	0.13186	0.197985	0.0014184	0.0767724	0.045986	0.0506385	0.239646	0.082479	0.0784408	-0.00891532	0.241198	0.234867	-0.0187491	0.0380268	0.119821	0.216464	0.308579
1.44	0.468685	0.314625	0.244738	-0.0430011	0.345805	0.229356	0.0356991	0.0270989	0.130691	0.0730802	0.189157	0.0207922	0.05325	0.0772776	0.0352039	0.129837	0.0507844	-0.0565998	0.0249552	0.190883	0.214375	0.0443407	0.031648	0.13119	0.180588	0.283873
1.46	0.491091	0.284403	0.244649	0.00346778	0.338617	0.206838	0.0705775	0.0116702	0.126517	0.137158	0.185591	-0.0190384	0.127785	0.077615	-0.000872309	0.0597314	-0.0245187	-0.0408338	-0.016563	0.103859	0.202416	0.00951572	-0.0388602	0.142021	0.148762	0.336318
1.48	0.439818	0.299845	0.294436	0.0244592	0.302203	0.159843	0.0736567	0.00567632	0.135357	0.109414	0.202543	-0.0121113	0.0776884	0.0678635	0.0458517	0.311408	0.000263423	-0.017732	-0.0372935	0.161761	0.232223	0.0213661	0.0704706	0.176481	0.109728	0.325204
1.5	0.373373	0.308567	0.291433	0.0292201	0.380435	0.176435	0.0526377	-0.00808674	0.119398	0.130312	0.175762	0.00293029	0.0552425	0.0431437	0.029157	0.276368	0.0656493	-0.0509964	-0.0310171	0.129797	0.21173	-0.00995217	0.00258048	0.166701	0.169827	0.374965
1.52	0.39504	0.275246	0.28273	-0.19493	0.35178	0.175185	0.0496685	0.00903543	0.120809	0.102418	0.190719	-0.0208249	0.0719201	0.0508308	0.0510437	0.0604378	0.00820957	-0.136959	0.0072944	0.151823	0.215183	0.149065	-0.0174137	0.145182	0.110755	0.317906
1.54	0.375487	0.266423	0.278935	-0.0272593	0.303764	0.135407	0.060798	0.0101144	0.113693	0.137777	0.237913	-0.0670087	0.0547701	0.0572564	0.0322595	0.163918	0.0217155	0.024022	0.0240326	0.122842	0.187837	0.037744	0.0435502	0.0876713	0.0794496	0.315728
1.56	0.367887	0.251477	0.287252	0.0190102	0.319016	0.091159	0.00803443	0.0158936	0.133925	0.108273	0.195531	-0.0491035	0.177585	0.0465108	0.0452504	0.182655	0.10773	-0.00735602	0.0473345	0.167174	0.18569	0.113368	0.0335826	0.143058	0.216774	0.362501
1.58	0.353351	0.259972	0.303054	0.00575289	0.321443	0.0756245	0.0451214	0.0273019	0.123911	0.1392	0.195294	-0.0551497	0.0534195	0.139043	0.0239722	0.268274	0.12138	-0.0494751	0.0367653	0.131987	0.178065	-0.0252633	-0.0287088	0.173948	0.105742	0.343435
1.6	0.45213	0.241473	0.239588	0.137809	0.290119	0.1898	0.0333048	0.0119778	0.116763	0.103261	0.198133	0.0434193	0.0685661	0.0536527	0.0531169	0.2615	0.108676	0.0417917	0.014874	0.170339	0.219605	0.0649857	0.0511611	0.0866967	0.118643	0.397942
1.62	0.294641	0.238296	0.283795	-0.068751	0.303378	0.115881	0.0400122	-0.0221	0.12047	0.0865224	0.20484	0.0228817	0.0486828	0.0918528	0.0480355	0.158944	-0.00970614	-0.187008	0.0743617	0.169341	0.184322	-0.0140194	0.0411443	0.183256	0.140907	0.340186
1.64	0.36998	0.265517	0.279609	0.0913699	0.301941	0.205798	0.0683856	-0.0039503	0.107624	0.134186	0.18709	-0.0412209	0.118551	0.051949	0.0386128	0.273592	-0.0368822	0.0193515	-0.0153812	0.191733	0.193535	-0.0229277	0.0563842	0.0868587	0.130558	0.331936
1.66	0.382711	0.297147	0.236392	0.0361572	0.3236	0.196201	0.0325481	0.00814483	0.12973	0.114209	0.19215	0.0278009	0.110555	0.0502709	0.0182431	0.222455	0.0564083	0.0147041	-0.0278561	0.141267	0.211474	0.0832713	-0.000211332	0.152138	0.157355	0.360872
1.68	0.412082	0.274693	0.238029	0.079298	0.289044	0.25309	0.0654256	-0.00840001	0.113282	0.110393	0.188622	0.0191129	0.0542965	0.114353	0.0553475	0.243302	-0.0492343	0.116041	0.0306456	0.230718	0.176428	0.0319311	-0.0163182	0.0975878	0.168576	0.299123
1.7	0.313368	0.252533	0.284342	-0.0261752	0.252763	0.116223	0.028002	0.00434662	0.11727	0.146047	0.19663	0.036911	0.091076	0.129495	0.0289908	0.291168	0.0338317	0.0200145	0.0424229	0.100668	0.200485	0.0388714	0.0132374	0.124918	0.0896828	0.314892
1.72	0.394222	0.239441	0.306369	0.0365972	0.259898	0.151141	0.0493758	-0.0106944	0.111535	0.151478	0.219845	0.0231051	0.109467	0.069962	0.0118448	0.210177	0.0204404	-0.0133822	0.0462511	0.114046	0.230456	0.0762528	0.00510353	0.108699	0.118551	0.358737
1.74	0.397077	0.261389	0.323675	0.1162	0.265473	0.247802	0.0201243	0.0252032	0.108292	0.0887758	0.174312	-0.00621269	0.0744198	0.0358827	0.0293831	0.119133	-0.00625977	-0.0503685	-0.0210559	0.131329	0.222189	0.0176977	0.025307	0.105237	0.192828	0.320841
1.76	0.318892	0.243041	0.286779	0.0590664	0.348746	0.142287	0.0315124	0.0176723	0.103517	0.092291	0.192731	-0.0342873	0.0344882	0.067591	0.0013902	0.290681	0.000403768	0.129706	-0.0052274	0.0736901	0.189576	-0.0234413	-0.0120612	0.15809	0.0904411	0.295506
1.78	0.334551	0.217846	0.273268	0.0977093	0.379695	0.0942964	0.0875897	0.0281842	0.11504	0.0940365	0.187414	-0.0100914	0.0473287	0.0602272	0.0157573	0.259166	-0.010337	-0.0616489	0.0210576	0.121548	0.279211	0.0474987	0.066121	0.107796	0.0910657	0.358146
1.8	0.354345	0.215379	0.301494	-0.0871368	0.3317	0.0841051	0.0433974	-0.00288882	0.11378	0.109923	0.187248	-0.0635042	0.0578552	0.0312367	0.0320607	0.230204	-0.0210298	-0.0256241	0.0633427	0.188734	0.191168	0.0910559	0.0328689	0.161388	0.209072	0.367468
1.82	0.386183	0.226447	0.279899	-0.0912513	0.3342	0.223595	0.0370139	0.0206963	0.113221	0.0949368	0.229215	-0.029455	0.0784257	0.0480411	-0.00356065	0.0829629	0.0921115	-0.116001	0.0175573	0.107942	0.103139	0.092849	-0.0237357	0.115829	0.136999	0.277918
1.84	0.334371	0.187155	0.242806	-0.0392988	0.357389	0.0449849	0.0321345	-0.00226579	0.121006	0.0974955	0.188139	0.0221156	0.0369669	0.0768395	-0.0035988	0.136768	-0.00774233	0.0319406	-0.013142	0.122071	0.232604	0.0110663	-0.0174759	0.106405	0.107109	0.278875
1.86	0.292869	0.267932	0.230989	-0.0051703	0.327808	0.181091	0.024117	0.0190313	0.122131	0.119427	0.186318	-0.0381198	0.071827	0.0885218	0.0735911	0.145819	-0.00807217	-0.158092	0.0288766	0.100628	0.124042	0.0578855	-0.00966469	0.149404	0.0910519	0.314763
1.88	0.369736	0.202291	0.257263	-0.00501436	0.295076	0.187212	-0.013922	-0.0068778	0.115354	0.100784	0.169084	-0.0527569	0.0783019	0.0517023	0.0159816	0.217349	0.0767622	0.00290315	-0.00664266	0.100973	0.134353	0.0662132	0.0105319	0.216377	0.186559	0.253776
1.9	0.406494	0.221074	0.260768	0.0259472	0.27721	0.122363	0.0337249	-0.0138883	0.104215	0.0840098	0.201944	-0.0119302	0.0952998	0.0777093	0.0477761	0.28187	-0.00684739	-0.178	-0.0378604	0.0978595	0.183427	0.0914481	-0.015613	0.141877	0.175386	0.368757
1.92	0.360278	0.199602	0.242723	-0.0467396	0.366237	0.123304	0.057285	-0.0206047	0.118094	0.0968712	0.206161	0.0287609	0.0203031	0.0827687	0.021068	0.281844	0.0745372	0.0225999	0.0136076	0.0729264	0.184543	0.146002	0.0540776	0.0538756	0.158574	0.310893
1.94	0.328296	0.170275	0.22112	-0.0583196	0.307698	0.0421964	-0.00902326	-0.0192984	0.108101	0.109587	0.199341	-0.0388986	0.0631237	0.0283496	0.00171247	0.32061	0.0262888	0.140081	0.0195334	0.0923402	0.177799	0.194471	0.00788143	0.122454	0.145198	0.276708
1.96	0.359799	0.251255	0.292898	-0.0178307	0.311464	0.12104	0.0444155	0.0165107	0.105639	0.118423	0.183553	0.00152121	0.125445	0.0511456	0.0379275	0.219734	-0.00156405	0.0270509	0.0184459	0.0875404	0.22239	-0.0142323	0.0070156	0.140694	0.113704	0.330126
1.98	0.37508	0.257384	0.288944	-0.0199145	0.318599	0.149288	0.0469116	0.0128413	0.113627	0.135128	0.167597	-0.0221644	0.114139	0.0198153	0.0587504	0.0439092	-0.0338317	-0.117566	-0.0323409	0.13152	0.162908	-0.00681371	-0.00595305	0.135308	0.118351	0.302865
2	0.303805	0.225236	0.260247	-0.013889	0.274148	0.105887	0.0509749	0.0384715	0.0922698	0.115456	0.151919	0.0271326	0.0841753	0.0458085	0.037622	0.188632	0.0154823	0.131066	0.00667758	0.0679582	0.238861	0.153537	0.0350276	0.157746	0.108225	0.247758
2.02	0.333905	0.252358	0.274021	0.0378438	0.287328	0.238706	0.0407482	0.0175517	0.119121	0.114495	0.176051	-0.0436609	0.0615064	0.0563358	0.0517665	0.278706	0.0428654	-0.068961	-0.0282776	0.084055	0.220299	0.013753	0.077749	0.130445	0.158695	0.269312
2.04	0.324452	0.217645	0.238832	0.107739	0.334875	0.0442028	0.034236	0.0105762	0.118191	0.0910121	0.156728	-0.0705315	0.0549521	0.023691	-0.00148082	0.215396	-0.0371217	0.0804721	0.0195181	0.0775924	0.175977	0.112232	-0.0326484	0.119532	0.140609	0.250468
2.06	0.342776	0.224545	0.269239	0.0646747	0.311094	0.158309	0.0447128	0.0259145	0.11213	0.0969204	0.222436	-0.0110563	0.0744813	0.0686572	-0.0145956	0.241825	0.0169901	-0.0252375	0.00912406	0.0672957	0.215693	0.0836454	-0.0540964	0.134623	0.151095	0.301088
2.08	0.399819	0.243768	0.274582	0.0843527	0.31642	0.0729218	0.0381308	-0.00770622	0.0845511	0.116497	0.183624	0.0375288	0.181777	0.0335367	0.0669655	0.304164	0.0464167	0.189636	-0.0109968	0.101207	0.165213	-0.00175257	0.059397	0.0795407	0.18181	0.275439
2.1	0.308843	0.225265	0.273112	0.0565726	0.290534	0.223403	0.0287614	0.0123506	0.109512	0.123548	0.182194	-0.0431088	0.0523051	0.069856	0.0211982	0.179967	-0.010665	-0.0423038	-0.0329659	0.114734	0.171362	0.0451065	-0.0157147	0.149192	0.0900314	0.190209
2.12	0.333747	0.211234	0.22739	0.0781431	0.304358	0.192438	0.012897	-0.00154277	0.0994719	0.115734	0.158263	0.00276296	0.110844	0.0166651	-0.0570027	0.184256	0.119108	-0.00310854	0.0645225	0.155277	0.210672	0.042422	0.0459278	0.124409	0.103649	0.301543
2.14	0.330341	0.20777	0.249023	0.0701699	0.32588	0.108402	0.0223982	0.0275381	0.105788	0.0987936	0.187641	-0.000629425	0.0728157	0.0454106	0.0516177	0.127495	0.0216322	0.211092	0.0207274	0.0841389	0.196636	0.0179222	-8.81814e-05	0.126377	0.162792	0.29635
2.16	0.320895	0.20616	0.245011	0.124125	0.344168	0.10495	0.017436	-0.00843717	0.0987872	0.0807882	0.202791	0.0218428	0.0510816	0.0367748	0.0417422	0.202504	-0.00817217	-0.076126	0.0433623	0.0656986	0.144877	0.0989014	0.00110798	0.0533709	0.171474	0.32102
2.18	0.404825	0.245688	0.280585	0.0871157	0.321956	0.214094	0.0271593	-0.0375329	0.107971	0.0718104	0.177039	0.00761381	0.0467521	0.0244741	0.0310678	0.134851	-0.026548	-0.0622641	0.057108	0.109321	0.20459	0.104168	-0.0424334	0.0910445	0.143321	0.288192
2.2	0.343707	0.196294	0.278161	-0.056824	0.276606	0.0151573	0.0513697		0.102872	0.0658689	0.221149	0.0219604	0.0187031	0.0315874	0.0375139	0.25981	-0.014567	0.00657313	-0.0363273	0.101893	0.119393	0.091935	-0.0462109	0.130385	0.127257	0.264615
2.22	0.31871	0.214456	0.237928	0.0831068	0.286021	0.0532234	0.0428514	0.00805439	0.0994507	0.113748	0.18935	0.00282967	0.0306552	0.0728593	0.0192345	0.135414	0.126832	0.219042	0.0144362	0.137188	0.15264	0.0543693	0.0087143	0.11934	0.0902231	0.266573
2.24	0.310776	0.181058	0.252993	0.0515402	0.260099	0.245587	0.00595689	-0.0175137	0.0929471	0.0982358	0.156117	-0.0214979	0.0834935	0.0484648	-0.0184253	0.0996317	-0.0308935	-0.0178343	0.0222025	0.117776	0.181481	0.000679645	-0.0180899	0.138382	0.0968981	0.258255
2.26	0.380748	0.200049	0.275117	-0.0617621	0.241784	0.168992	-0.0118193	-0.010519	0.099575	0.0255584	0.174052	0.0173379	0.123085	0.0516074	0.0363059	0.0173673	0.00459963	0.0611753	-0.00761805	0.0524752	0.168589	0.00199919	-0.0283805	0.149817	0.103862	0.275084
2.28	0.392125	0.228804	0.279557	-0.115573	0.256017	0.0331013	0.0490481	-0.01015	0.0928596	0.0909239	0.206889	-0.0408081	-0.0171078	0.0443971	0.0230347	0.240668	0.121296	-0.0277107	0.0300323	0.0826282	0.16923	0.122083	0.0425143	0.169688	0.132687	0.243996
2.3	0.3482	0.191756	0.241372	0.000754912	0.239549	0.226034	-0.0011481	0.000454126	0.0866144	0.0715988	0.1646	-0.0117737	0.0493847	0.00139059	0.0457584	0.283032	0.0457512	-0.0389766	0.0571323	0.119049	0.19091	0.130853	0.0149979	0.0514185	0.121109	0.290389
2.32	0.358218	0.218009	0.27803	-0.0359982	0.244498	0.041294	0.00629658	0.0133092	0.0798095	0.0673024	0.172561	0.0276736	0.130112	0.0586502	0.0215311	0.0907889	0.0850282	0.0352287	0.0279086	0.0696155	0.108897	-0.0421689	-0.0326766	0.101844	0.180846	0.334099
2.34	0.319789	0.220002	0.263667	-0.0179318	0.248763	0.102681	0.0200504	0.0309584	0.0908437	0.11068	0.172729	-0.0384745	0.0225687	0.0164926	0.0469356	0.128509	0.0064731	0.00342884	-0.027995	0.116218	0.12177	-0.0757208	0.00336956	0.0926486	0.163781	0.30049
2.36	0.357274	0.160629	0.231107	-0.0423112	0.312341	0.125391	-0.00783188	-0.00921125	0.0968966	0.10242	0.174929	0.0260324	0.0343433	0.0692251	0.0548437	0.168998	0.0376837	-0.0410989	0.0165767	0.10057	0.20516	-0.00451829	0.0301238	0.170606	0.15754	0.263504
2.38	0.350861	0.0590837	0.247059	-0.015506	0.19538	-0.0084159	0.00283847	0.017871	0.108593	0.124739	0.186105	-0.00813821	0.102914	0.0514933	0.0327591	0.220282	0.0819248	0.0912866	0.0490802	0.077683	0.187575	0.0642063	0.00058611	0.130336	0.129865	0.245202
2.4	0.363422	0.15462	0.205046	0.105229	0.316525	0.100153	0.01879	-0.0137276	0.090277	0.102416	0.156072	-0.0603243	0.0239307	0.0387009	0.0490159	0.32293	-0.0597872	-0.0160783	0.0102141	0.0497397	0.123365	0.0366682	-0.0262754	0.0590621	0.121685	0.253399
2.42	0.347693	0.126639	0.25862	0.0609149	0.290464	0.134442	0.000160581	0.0220411	0.093717	0.110965	0.166878	0.0486869	0.102932	0.0392839	0.0699368	0.258756	-0.0141165	-0.0549522	0.0471733	0.0412236	0.176049	-0.00429966	0.0618237	0.067115	0.115896	0.259332
2.44	0.330191	0.146143	0.184591	0.0883263	0.227141	0.131737	-0.00250956	0.0343298	0.0940524	0.117951	0.179798	0.0381111	0.166892	0.0627712	0.0468096	0.268911	0.0707705	0.00414997	0.0585658	0.0679809	0.130115	0.0682552	-0.0174765	0.110648	0.0646028	0.251793
2.46	0.326403	0.189366	0.22816	0.0415722	0.333664	0.0735058	-0.00626618	0.0318866	0.115069	0.108264	0.178444	-0.0298862	0.105214	0.033395	0.0399282	0.302601	-0.00578689	0.11967	0.0140634	0.085012	0.17012	0.00602742	0.0661171	0.0862817	0.0875635	0.284209
2.48	0.276509	0.239651	0.205422	-0.0750524	0.238319	0.064637	-0.00806871	0.0248841	0.0950181	0.117686	0.192024	0.00370802	0.0602181	0.0849877	0.0583978	0.223357	0.0291808	-0.04848	-0.0172817	0.0532066	0.219321	0.00685804	-0.0579148	0.118894	0.141301	0.270581
2.5	0.333021	0.173428	0.217052	-0.0668322	0.259701	0.081322	-0.0164708	0.0264037	0.0879149	0.0989843	0.160052	-0.0421842	-0.0223955	0.0301966	0.0543398	0.298554	0.00514451	0.00910121	-0.0123665	0.0796118	0.128423	0.118962	0.00329116	0.178502	0.11225	0.255531
2.52	0.328312	0.187038	0.231204	0.0979199	0.288067	0.121801	0.00603966	0.00534789	0.095297	0.0874133	0.162585	0.0131972	0.0962849	0.0279329	0.0481047	0.13766	0.120969	0.142704	-0.00695922	0.0616765	0.161007	0.0656744	0.0224586	0.11193	0.175746	0.278178
2.54	0.348376	0.109758	0.232108	0.0494865	0.213024	0.0616234	0.0376986	0.0221093	0.0755272	0.111414	0.186377	-0.0247145	0.0509074	0.0403609	0.0669849	0.197538	0.0842423	0.00690469	0.0215237	0.0287434	0.142445	0.0679558	-0.00439867	0.0665015	0.125609	0.31137
2.56	0.32331	0.0889976	0.213216	0.0480387	0.230038	0.0534953	0.0429522	-0.000208269	0.100707	0.108184	0.173	-0.0370683	0.031996	0.0398243	0.0513449	0.130995	0.0218304	-0.0180872	-0.00364244	0.0462954	0.125051	-0.0044203	0.0271637	0.122803	0.147205	0.232141
2.58	0.319824	0.0311937	0.249842	0.0775093	0.230875	0.153721	0.000745985	0.0203546	0.0951091	0.111107	0.166228	0.0148276	0.0920065	0.0269527	0.0755808	0.0876478	-0.0109835	-0.200845	-0.0267211	0.0878408	0.115289	0.0576162	-0.0595361	0.0473686	0.184782	0.275789
2.6	0.3164	0.0950821	0.234385	-0.091381	0.258872	0.0868863	0.0218919	0.0144463	0.0692598	0.105754	0.178057	-0.0743152	0.0579947	0.0496023	0.0345583	0.197048	0.0689102	0.131127	-0.00627483	0.0752516	0.143788	-0.00841496	0.00581144	0.0566698	0.10688	0.284564
2.62	0.284464	0.0462192	0.254624	0.11146	0.275246	0.245158	0.0161073	0.00922871	0.11633	0.119775	0.168114	-0.052213	0.0603856	0.0429232	0.036301	0.25873	0.0177453	0.152773	-0.0274788	0.112735	0.141592	0.0276963	0.0434468	0.0980422	0.113732	0.212064
2.64	0.374761	0.104659	0.280089	0.0577608	0.342287	0.122048	0.001762	-0.00556406	0.0929204	0.0775972	0.179293	0.0183077	0.037883	0.0375683	0.0070259	0.227426	0.00585951	0.0716512	0.00831068	0.0552706	0.133981	0.014936	0.0506337	0.0917828	0.0881242	0.210993
2.66	0.36168	0.0822904	0.225119	0.111425	0.303397	0.129125	-0.0280984	0.00900567	0.0815763	0.0891595	0.159366	-0.0254713	0.0631992	0.0263122	0.0294446	0.116954	-0.0588288	-0.0151733	0.0155281	0.0416079	0.1668	0.0543912	0.0232639	0.080423	0.0707842	0.288416
2.68	0.328552	0.108394	0.230096	-0.0454029	0.285891	-0.00884985	0.0209293	-0.0149568	0.0904833	0.0875338	0.179702	0.0131086	0.07789	0.0521171	0.0460806	0.347753	0.0812874	0.150172	0.0178336	0.0931721	0.145293	0.0849414	-0.0175364	0.0786377	0.0837534	0.306333
2.7	0.29871	0.065868	0.267409	-0.06917	0.266082	0.185704	0.0116563	-0.00926354	0.0914835	0.0787556	0.160072	0.00569571	0.0881098	0.0295007	0.0293341	0.260216	0.106773	-0.108673	-0.0345939	0.0222228	0.128334	0.0515578	0.0610665	0.0958335	0.143337	0.226128
2.72	0.340839	0.107063	0.245865	0.00262618	0.257918	0.11881	0.00469271	0.0320998	0.0862129	0.123488	0.172576	-0.0270031	0.0933208	0.0480196	0.120531	0.0881848	-0.0418922	-0.0118378	0.0106647	0.0363484	0.128029	0.0638019	-0.0672589	0.084889	0.0917278	0.239137
2.74	0.337294	0.0742126	0.27378	-0.104946	0.179161	0.00571512	0.0414693	0.00081603	0.100966	0.0712698	0.143902	-0.0625576	0.101327	0.0486442	0.0349838	0.158918	-0.00997459	0.180131	0.0188442	0.0412986	0.142696	0.0661724	-0.0503425	0.0857951	0.152404	0.242486
2.76	0.375646	0.0592049	0.250248	-0.0621768	0.26405	0.193719	-0.0143089		0.0724699	0.0816099	0.171912	-0.0119125	0.114567	-0.00127807	0.0347328	0.176191	-0.0673155	-0.0220926	0.00029414	0.0230167	0.139014	0.151426	0.00715582	0.109489	0.15106	0.180503
2.78	0.319546	0.0772432	0.254583	0.0525485	0.289032	0.0625635	-0.00432672	0.0155553	0.0875762	0.0517761	0.171703	-0.0411422	0.0233123	-0.00451994	0.0323963	0.15188	-0.0337432	-0.0312565	0.0129136	0.0485048	0.155796	0.0169122	-0.0363787	0.130784	0.0424049	0.244038
2.8	0.337397	0.0268218	0.211138	-0.000662888	0.381365	0.0718646	0.00432951	0.00507971	0.0797461	0.111044	0.147224	-0.0156952	0.0378497	0.0166633	0.0649935	0.183647	0.0894565	-0.171997	0.00376373	0.0917539	0.146094	-0.00901997	0.0117579	0.0946597	0.0766744	0.235248
2.82	0.353301	0.0669882	0.23343	0.0550649	0.282247	0.0427102	-0.00932452	0.0216719	0.0831825	0.083523	0.202333	-0.0546234	-0.0050654	0.00591479	0.0542053	0.161513	-0.0423737	-0.105498	0.0140873	0.0293456	0.117111	0.0125936	-0.034743	0.021649	0.0545153	0.246642
2.84	0.297007	0.0825271	0.230799	-0.0996777	0.252067	0.109988	0.0139072	-0.00325459	0.070739	0.0844689	0.182067	-0.0603729	0.04364	0.0258988	0.0396132	0.183777	-0.0781198	0.114914	0.00027927	0.0307718	0.136328	0.052988	-0.00870714	0.105159	0.0845887	0.223107
2.86	0.371032	0.0658739	0.230956	-0.0228796	0.268726	0.117077	0.000704582	-0.00895548	0.0834999	0.0987866	0.164073	-0.0589994	0.0304056	0.0549278	0.0357355	0.243651	-0.0421828	-0.00430159	-0.0389062	0.0907687	0.156775	-0.0715221	-0.0322415	0.0756276	0.0658064	0.304368
2.88	0.347718	0.0641567	0.237856	-0.0856398	0.334619	0.140594	0.0452482	-0.0118877	0.052344	0.0860107	0.153063	0.0154036	0.0274885	0.0414721	0.053571	0.203754	-0.00656661	0.0653457	0.00138846	-0.0178366	0.153972	0.145048	-0.0379623	0.124791	0.108049	0.189572
2.9	0.263694	0.0517254	0.203466	-0.112234	0.272608	0.110043	-0.00393675	0.0238705	0.080976	0.0936977	0.164429	0.0241711	0.0781285	0.0530491	0.0730623	0.147917	-0.0174973	0.0159815	-0.0115193	0.101087	0.096823	0.032973	0.067796	0.0621848	0.106769	0.23047
2.92	0.299111	0.0715897	0.215987	-0.0350675	0.370589	0.0609918	-0.0157722	-0.00353738	0.0872978	0.0758337	0.152863	-0.0192242	0.123112	0.00641898	0.0725481	0.286381	0.0474833	-0.0102791	-0.033281	0.0623891	0.151214	0.0686456	0.0155866	0.0755077	0.0348883	0.197047
2.94	0.344063	0.0417676	0.225239	0.0635681	0.30227	0.0996353	0.00276975	-0.0180488	0.0884661	0.0905553	0.150441	-0.0334665	0.016578	0.0438909	0.0417214	0.189953	0.105606	0.00752728	0.0254566	0.0306725	0.124023	0.00522538	0.0654524	0.021557	0.0667783	0.234349
2.96	0.292363	0.0955133	0.206155	0.0536836	0.324574	0.0622082	0.0324002	-0.00557658	0.0706304	0.0691485	0.16397	-0.0676638	0.0454466	0.0391625	0.070146	0.142171	-0.0294245	-0.0317637	0.0441403	0.0685532	0.167643	-0.102573	0.0190565	0.094325	0.0697271	0.22901
2.98	0.321542	0.0207397	0.26482	-0.0026034	0.292052	0.117394	0.00866244	0.0138599	0.0821489	0.0879311	0.145568	-0.0614735	0.0149597	0.0222917	0.093004	0.281334	-0.0143136	-0.0403914	0.0202195	0.0549159	0.110356	-0.0246051	-0.0454348	0.129073	0.0870366	0.193361
3	0.350231	0.0227115	0.215794	-0.111787	0.233788	0.0898825	0.0115621	-0.0223013	0.0795063	0.0828673	0.131326	-0.0521282	-0.0140562	0.0309241	0.0478871	0.186309	0.0127405	0.00224618	-0.00244808	0.0150288	0.0875489	0.104481	-0.0362271	0.0487438	0.106232	0.251967
3.02	0.333044	0.0716687	0.225017	0.0684522	0.28964	0.0342838	0.0360773	0.00803429	0.0765743	0.0768827	0.131325	-0.0018555	0.0381149	0.0430972	0.0363881	0.23041	-0.0440169	0.0807936	0.0130289	0.0103928	0.120826	0.143627	0.0416401	0.0964394	0.0782424	0.284323
3.04	0.352633	0.0533526	0.214058	-0.107172	0.364803	0.107252	0.022141	0.00176501	0.0730835	0.0825038	0.140646	-0.0224199	0.0241672	0.0493636	0.0620612	0.33518	-0.0456509	0.0340956	0.0214136	0.035937	0.165519	0.0656941	-0.0175839	0.0298055	0.102377	0.218694
3.06	0.298218	0.0442572	0.21438	-0.000903831	0.300466	0.156305	0.0100937	-0.00956533	0.0623161	0.0965262	0.158162	-0.0193587	0.0721764	0.0269924	-0.0249219	0.153317	0.00369501	0.137825	-0.007136	0.0168272	0.146252	0.00663932	-0.00677372	0.115474	0.0851771	0.238466
3.08	0.342945	0.0345674	0.181106	-0.0924037	0.262149	0.174683	0.0370984	0.0078967	0.0634011	0.0505868	0.190377	-0.026004	0.0280399	0.0674037	0.0762644	0.254219	-0.0408103	-0.0923991	-0.012233	0.0706165	0.159096	0.0745534	0.0360231	0.0759321	0.123386	0.240168
3.1	0.262217	0.0658296	0.25349	0.0809296	0.208508	0.147235	0.00357514	0.00108198	0.0553592	0.0778398	0.166699	-0.0363574	0.0660041	0.0521927	0.00815556	0.182695	0.00976313	-0.00811814	0.0196423	0.0244179	0.173327	-0.0484141	-0.00572492	0.114148	0.068235	0.240614
3.12	0.328997	0.0419864	0.221258	-0.0393352	0.232208	0.0405546	-0.0376426	-0.00673661	0.0879205	0.0914677	0.177831	0.0164608	0.0148248	0.0228706	0.0667295	0.293715	-0.00257891	-0.00269231	0.0593787	0.0211394	0.126613	-0.0409271	-0.0655442	0.0786572	0.130705	0.26207
3.14	0.268777	0.0515689	0.179893	-0.0682563	0.29415	0.0252312	0.0132655	0.002735	0.102316	0.083762	0.166614	-0.0759408	0.0438107	0.0449162	0.0350261	0.330207	0.0481141	-0.167078	-0.0341778	0.0248656	0.0792958	-0.0317097	0.0766485	0.0601694	0.111238	0.236099
3.16	0.31053	0.0989931	0.23234	0.0375307	0.296127	0.0870556	0.0286695	0.00332416	0.103451	0.088896	0.147797	0.0329866	0.0193304	0.0373227	0.0414679	0.333502	-0.052682	0.0696431	0.0384235	0.020725	0.172368	-0.0370262	-0.0483078	0.111836	0.0795591	0.278965
3.18	0.345486	-0.00824701	0.231165		0.231478	0.094225	0.0123216	-0.00666397	0.104479	0.0982576	0.152742	-0.0215505	0.0459227	0.0531833	0.0772084	0.221189	0.01438	-0.0867811	-0.0204126	-0.0321244	0.135112	0.099697	-0.0374543	0.0629016	0.140815	0.193366
3.2	0.220994	0.0632377	0.315497	0.0357506	0.325145	0.0607725	0.0488804	0.0101974	0.088591	0.0686854	0.125868	-0.0179591	0.0234058	0.0371462	0.0604309	0.259563	0.0695581	0.0393707	-0.00239968	0.0313793	0.116703	0.0288543	0.012314	0.0576065	0.12556	0.259243
3.22	0.336852	0.042193	0.255467	-0.0201574	0.26356	0.112475	0.0322575	-0.0093395	0.101142	0.055431	0.155781	-0.0277657	0.0918335	0.015287	0.0299925	0.184348	-0.0621943	0.130339	-0.0275467	0.048383	0.116433	4.29798e-05	0.0510195	0.118554	0.0515147	0.278623
3.24	0.310399	0.0355159	0.19371	-0.0482128	0.276274	0.145428	-0.00151114	0.00219296	0.111044	0.0854295	0.169438	-0.0166389	0.0535282	0.0255213	0.0472717	0.140936	0.103151	0.102806	0.00652561	-0.0387537	0.0979651	0.0374198	0.0546627	0.127527	0.0555859	0.182817
3.26	0.297397	0.0713833	0.201619	-0.217764	0.238315	0.0319743	0.0466157	-0.0109793	0.115199	0.0932392	0.147099	-0.0334965	0.0430756	0.00406877	0.0457376	0.131729	0.0738637	0.0469887	-0.00707483	0.0845855	0.115144	-0.00432677	0.00531481	0.0410518	0.0694711	0.243361
3.28	0.287571	0.018897	0.218208	-0.0904292	0.278764	0.0325006	0.0131876	-0.00154905	0.113135	0.0755547	0.144923	-0.0637325	0.038389	0.0518806	0.0514231	0.158115	0.0207038	-0.069301	-0.00596497	0.100316	0.172988	-0.00231171	-0.0243497	0.0930956	0.0667832	0.209096
3.3	0.318525	0.0842433	0.198521	-0.156198	0.316958	0.158881	0.0665795	-0.00320119	0.115416	0.0922231	0.180138	-0.0503239	0.015334	0.0358224	0.0337851	0.188806	-0.0488243	0.135131	0.0310783	0.0381136	0.0833961	-0.0208052	-0.0581561	0.074094	0.0726832	0.219322
3.32	0.298991	0.0808412	0.231771	0.0457734	0.235785	0.250735	0.00154513	-0.0194182	0.103236	0.0654136	0.143554	0.000923221	0.0484157	0.0498207	0.0570127	0.187876	-0.00692798	0.0469878	-0.00890933	-0.0199541	0.140652	0.00910091	0.0163709	0.0163942	0.111468	0.224526
3.34	0.290906	0.0524088	0.256096	0.0387386	0.158023	0.160461	0.00838184	-0.0241932	0.0970607	0.0690097	0.133729	-0.00857862	0.0370557	-0.0365426	0.0323831	0.196835	-0.0596651	0.0946816	-0.000124367	-0.00623635	0.110822	0.0966283	-0.0484958	0.0346891	0.0264307	0.239077
3.36	0.249586	0.0463297	0.196355	-0.125211	0.212952	0.126918	0.0174986	0.00152523	0.115945	0.106636	0.163363	-0.00753136	0.00353538	0.0289294	0.00469403	0.139076	-0.0272478	0.00228992	0.0147929	0.0194972	0.107778	0.0306478	-0.0127055	0.0860285	0.0461066	0.247297
3.38	0.279568	0.0719958	0.242479	-0.00744977	0.367545	0.135255	0.0144702	-0.00505214	0.109158	0.0634468	0.165408	-0.0386407	0.0396659	0.024896	0.0477116	0.171481	-0.0392656	0.0790684	0.0253982	0.0409299	0.12298	0.0261646	0.00257567	0.0741403	0.0414967	0.167073
3.4	0.323978	0.0868025	0.196786	-0.0488777	0.244881	0.0738549	-0.0128504	-0.0212113	0.108431	0.0752099	0.181788	0.0254595	0.0778068	0.0480908	0.0191139	0.126232	0.0167308	0.00430132	0.00652142	0.0331935	0.0895318	-0.00477104	0.0314839	0.094128	-0.0051539	0.256362
3.42	0.30423	0.0117246	0.250868	0.0108085	0.243873	0.118614	0.04419	0.0146617	0.103653	0.0840506	0.163733	-0.051992	0.0602659	0.0106629	0.0198451	0.0720839	-0.0264985	0.188124	0.00485238	-0.0174024	0.119197	0.0502977	-0.0328214	0.0792971	0.0360655	0.222015
3.44	0.303704	0.0270352	0.244003	-0.0485754	0.268593	0.111814	0.035649	0.0125924	0.108913	0.0913097	0.155544	0.0232529	0.102201	0.0500876	0.0262333	0.105618	0.0310977	0.190928	-0.0134656	0.00652816	0.134364	-0.102208	0.0121938	0.112292	0.0393071	0.225994
3.46	0.259324	0.0664175	0.254363	0.103536	0.278156	0.142958	0.0208871	0.0229759	0.120525	0.0665185	0.151771	-0.0500173	0.0406964	0.0381216	0.0626192	0.213761	0.0618687	-0.249577	-0.00434655	-0.000576258	0.10677	0.0739624	-0.00583234	0.0940573	0.0673624	0.23549
3.48	0.310995	0.0326185	0.201583	0.0675673	0.2382	0.0827429	0.0617424	-0.000254608	0.113812	0.0399326	0.158389	0.00573016	0.0922051	0.0268452	0.0373096	0.16827	0.0387182	0.0302052	-0.000772935	0.0502361	0.122001	0.00273694	0.00148365	0.122286	0.127633	0.203412
3.5	0.318274	0.0543656	0.231913	-0.0541511	0.24718	0.100443	0.0121572		0.0944692	0.0886022	0.145743	0.0418152	0.077772	0.0385999	0.0489783	0.0358084	0.0298523	-0.026242	0.0725298	0.0244821	0.118785	0.0859781	0.00281209	0.133018	0.0522974	0.129236
3.52	0.316648	0.0554316	0.214041	0.0417343	0.197408	0.17301	0.00439577	-0.0129337	0.101417	0.0804226	0.147533	-0.00175002	0.0394432	0.0441233	0.103901	0.257291	0.0688747	-0.0445834	-0.010455	0.00190196	0.0692686	-0.000387584	0.0207767	0.0676395	0.0673739	0.22304
3.54	0.331381	0.0375652	0.233295	0.0628345	0.286252	0.188462	-0.00895491	-0.00328027	0.10037	0.0825175	0.174716	0.00196466	0.0837014	0.0556002	0.0370989	0.148828	-0.0210593	-0.0769161	0.0109094	0.0113051	0.183548	0.0495794	-0.042705	0.0885571	0.0534173	0.196758
3.56	0.274969	0.0291841	0.275632	-0.00998597	0.255961	0.129499	-0.00504737	0.00264191	0.109119	0.100251	0.138012	-0.0267154	-0.00744328	0.0228991	0.025645	0.192054	-0.0419217	0.0908181	0.0175474	-0.0693568	0.0664611	0.0956473	0.0391458	0.0568997	-0.0293459	0.227736
3.58	0.299077	0.0135061	0.218938	-0.0650883	0.25137	0.182082	0.0488187	-0.00867612	0.109017	0.0970664	0.152013	0.0375593	0.0718305	0.0226578	0.0516951	0.163084	-0.00367612	-0.000628265	-0.037115	0.0473513	0.0677164	-0.0536789	0.00979792	0.0498487	-0.00364052	0.199227
3.6	0.288846	0.0372481	0.24891	0.00899485	0.288522	0.0885525	0.0374888	0.00920256	0.105879	0.0917439	0.150856	-0.021152	-0.017999	0.0169799	0.0545507	0.385655	0.00184301	-0.0150833	-0.0558529	0.0125855	0.089281	0.0751501	-0.023726	0.0477616	0.0175276	0.226388
3.62	0.301893	0.0212216	0.262125	0.140003	0.242368	0.122476	0.0121207	0.00596896	0.124973	0.0879899	0.128183	-0.0512307	0.040067	0.0123535	0.0412281	0.17386	0.061183	0.204641	-0.00901294	0.0760112	0.0950093	-0.00616698	0.0125155	0.0740631	0.0135683	0.174918
3.64	0.278223	0.0306566	0.20404	0.0623308	0.202783	-0.00121221	0.0311199	-0.0113052	0.110195	0.0934025	0.155645	-0.0256188	0.00938738	0.0452498	0.112481	0.211775	0.0484212	-0.0862304	0.010311	-0.0246522	0.124045	0.0092913	-0.00689378	0.104589	0.0787606	0.190258
3.66	0.299513	0.0414149	0.16216	-0.0842797	0.258879	0.0487522	0.00459666	-0.0221981	0.117944	0.0870493	0.143914	-0.020892	0.0509143	0.023547	0.0413457	0.11754	-0.0332535	-0.0938858	0.00337879	0.0398198	0.0551956	0.0602465	0.0343735	0.0851665	0.0540193	0.187474
3.68	0.279782	0.0122469	0.193873	0.0319213	0.242235	0.113231	-0.0346977	-0.0179824	0.0986598	0.0684149	0.156379	0.0126701	0.0406251	0.0461369	-0.0324557	0.225853	-0.0139233	0.0857366	0.012341	0.0100026	0.122506	0.049679	0.0232289	0.0887333	0.0777213	0.176339
3.7	0.298069	0.025344	0.196942	0.0431648	0.194446	0.0986354	0.0428598	0.0120807	0.110284	0.0766085	0.174906	-0.0148411	0.0511653	0.0308597	0.0385014	0.116875	-0.0693487	0.0625318	0.0122542	-0.0446032	0.0362618	-0.0253578	-0.00562313	0.0901965	0.0546771	0.239141
3.72	0.294785	0.0261775	0.188714	-0.044429	0.195326	0.158969	0.0348986	-0.0114649	0.122773	0.101994	0.128359	-0.0543168	-0.00698125	0.012694	0.0632828	0.183583	0.0665333	-0.0725106	0.00197181	0.00949172	0.119805	-0.0250229	0.0122096	0.105034	0.0673234	0.188328
3.74	0.324241	0.048445	0.232914	0.00827511	0.245362	-0.0338431	0.0389414	0.00468294	0.104417	0.0326731	0.142857	-0.0607507	0.00180371	0.0246817	0.0757111	0.281659	-0.0704496	-0.032496	-0.00789722	0.0946514	0.0859775	0.0390605	0.0240274	0.0759352	0.0705061	0.185095
3.76	0.284556	0.0836594	0.20618	0.088425	0.264789	0.143375	-0.0308084	-0.000798252	0.109667	0.0449595	0.139416	-0.014641	0.0245709	0.0269088	0.0445228	0.155366	-0.0306291	0.0146602	-0.0255848	0.0778748	0.120856	0.0150731	0.0549137	0.0524965	0.106653	0.155717
3.78	0.295009	0.0289695	0.244442	0.0230558	0.204949	0.0702996	0.0169996	0.0185682	0.109128	0.0923928	0.143163	0.0370441	-0.00227824	0.0350813	0.0399129	0.248177	-0.006689	-0.0427238	0.015717	-0.00951591	0.112039	-0.0349317	-0.0134973	0.0646075	0.0318248	0.166551
3.8	0.345995	0.049674	0.225811	0.0537572	0.205686	0.194098	0.00781135	-0.0111594	0.108349	0.0753867	0.142978	0.060451	0.0705073	0.0192303	0.0232295	0.180824	0.00214218	0.0320229	0.0478323	0.0149261	0.0690817	0.0261963	-0.0017455	0.0730674	0.0970107	0.221841
3.82	0.309545	0.00789082	0.224148	0.0597072	0.287342	0.0931132	0.0101743	-0.00690186	0.0967363	0.0412765	0.156805	0.0158931	0.0321902	0.0237779	0.0790369	0.14401	-0.00329768	0.131568	-0.0053935	0.0502451	0.109801	0.0142775	-0.0604755	0.0603423	0.0747599	0.178483
3.84	0.25488	0.0572268	0.189492	-0.0520995	0.277811	0.0368531	-0.0230868	0.00293692	0.106732	0.0503328	0.177147	-0.05056	0.0940229	0.00332579	0.0647413	0.16745	-0.0344198	-0.078117	-0.0310049	-0.0525663	0.103263	0.0834107	0.063719	-0.00369428	0.00829479	0.218791
3.86	0.229745	0.0620326	0.21251	0.0138904	0.274836	0.192025	0.0290047	0.000133251	0.106203	0.0954385	0.147758	0.00686944	-0.0415956	0.0305046	-0.000125166	0.0996161	-0.0462071	-0.0243818	0.00514079	0.0732294	0.0684991	0.0327447	0.0282638	0.0260447	0.0177308	0.197188
3.88	0.286986	0.0451199	0.220668	-0.00588125	0.2226	0.169422	0.0166661	-0.0208602	0.111874	0.078836	0.128957	-0.0284698	0.0700895	0.0542396	0.0429481	0.167822	-0.0344396	-0.048814	0.0194784	0.086372	0.144579	-0.0333076	0.0407331	0.0356244	-0.0102529	0.141309
3.9	0.313368	0.0610898	0.214264	-0.0614029	0.242292	0.0987007	-0.00644398	0.0132284	0.110235	0.0544872	0.139799	-0.00542611	0.0481692	0.0280115	0.0347874	0.198214	0.114767	0.126215	-0.0162754	0.00384368	0.104754	0.0192901	-0.023657	0.0631556	0.0544962	0.203257
3.92	0.25992	0.0184174	0.228932	0.0423947	0.277468	0.0525996	0.0156653	0.00790519	0.110908	0.0756309	0.124976	-0.0431061	0.0179072	0.0413005	0.0501799	0.0101021	0.0756788	-0.0847623	0.0106013	-0.0548386	0.107145	-0.066068	0.0142436	0.0352022	-0.0520398	0.272797
3.94	0.293297	0.0352973	0.177175	-0.0840405	0.206919	0.144801	-0.00559283	0.00788166	0.11396	0.0681738	0.170532	-0.00801951	0.0571092	0.0284821	0.0328969	0.170018	-0.033512	-0.0945851	-0.0259715	0.0310034	0.080813	-0.0209213	-0.0102971	0.0328507	0.0140519	0.177197
3.96	0.301111	0.0380925	0.196822	0.0757583	0.298098	-0.0406387	-0.0174921	0.000285655	0.123733	0.0553069	0.142328	-0.0553578	0.00351734	0.0150114	0.0570984	0.118482	0.0262885	-0.039212	0.016122	-0.0370391	0.0876996	0.0286414	-0.0424377	0.0844212	-0.00894793	0.154831
3.98	0.282245	-0.0122027	0.241638	-0.0219269	0.244547	0.0476835	0.0350179	-0.012598	0.0867913	0.0625996	0.169428	-0.0456463	0.0259481	0.0525331	0.00292969	0.0416701	0.0368517	0.00976984	0.0123931	-0.0221457	0.0384441	0.104536	0.0797548	0.0740354	0.0370122	0.228181
4	0.29105	-0.00967586	0.183143	-0.0597733	0.276287	0.0361877	0.0504817	-0.0161196	0.101664	0.0787358	0.146806	-0.0345879	-0.00381151	0.0287815	0.0233034	-0.0172838	0.0146549	-0.0715321	-0.0191388	0.0358347	0.056071	-0.0397321	-0.0270332	0.11094	0.0316352	0.202055
4.02	0.301089	0.00642426	0.195867	0.1118	0.225024	0.0858339	-0.00967571	-0.00787467	0.150872	0.0832346	0.141583	-0.0593818	0.063647	0.000387895	0.0431124	0.266629	0.113038	0.162145	-0.0426918	0.00329289	0.0648315	-0.0846851	0.0555044	0.0846058	-0.00224201	0.162851
4.04	0.250933	0.0131793	0.188645	0.0157453	0.254574	0.241025	0.0121891	-0.0119547	0.106757	0.0984806	0.142209	-0.0164158	0.0463718	0.0408841	0.0327016	0.316896	-0.0125488	0.132423	0.0204506	-0.085951	0.085441	0.000884202	0.0129136	0.0594001	0.0394309	0.216302
4.06	0.309651	0.0777218	0.209545	-0.0975976	0.237672	0.108157	0.0186584	0.012384	0.113253	0.0952874	0.158466	-0.00106096	0.0250438	-0.0390682	0.0547301	0.17474	0.0557011	-0.0652088	-0.00141365	0.0331823	0.087887	0.00823362	-0.0432272	0.0771936	0.0642813	0.183604
4.08	0.253962	0.0395678	0.20985	0.0456123	0.189222	0.165348	0.0191379	0.0191252	0.115929	0.0844996	0.143546	-0.00750568	0.0110246	0.00367377	0.0363204	0.166771	-0.0535181	-0.132897	-0.0108588	-0.0819364	0.128494	0.0806982	0.0269539	0.0704425	0.0384081	0.157995
4.1	0.301154	0.0435755	0.219746	-0.0410428	0.229269	0.222408	0.0348933	0.0244994	0.126427	0.0727854	0.132705	0.00785448	0.0633834	0.033481	-0.0195025	0.0483585	-0.0204534	-0.0702962	-0.0204385	0.000694357	0.124011	0.0797129	0.0145584	0.0868178	0.0429871	0.153869
4.12	0.293908	0.0078764	0.202289	0.115264	0.215711	0.0321197	-0.0130422	-0.0166847	0.104274	0.0339619	0.14955	0.0462194	0.0854501	-0.0115585	-0.0264601	0.16168	-0.0163581	-0.0466914	-0.00808279	0.0397283	0.0798858	-0.0448954	0.004683	0.087233	0.0471565	0.164276
4.14	0.271863	0.0850205	0.264674	-0.000397869	0.241673	0.134344	0.0122825	0.00186848	0.13267	0.0791509	0.13789	-0.0204171	0.0199214	0.033541	0.0376591	0.0206252	-0.072327	0.103046	0.0157326	0.0833416	0.081426	-0.0245058	-0.0104338	0.0608214	0.0621732	0.164131
4.16	0.267365	0.0107254	0.148117	0.0264456	0.26727	-0.0365817	-0.00999606	-0.00571342	0.115013	0.0515526	0.133057	-0.0273535	-0.00528789	0.0154941	0.027035	-0.00474692	0.038861	-0.0894064	-0.0438779	-0.0388423	0.108954	-0.029216	0.0466583	0.0646986	0.0343135	0.201607
4.18	0.277973	0.0346721	0.185324	-0.00738912	0.224057	0.153885	0.00741641	0.0173651	0.105589	0.0189686	0.141271	-0.0303615	-0.010866	0.00971788	-0.00684768	0.0903961	-0.0411538	-0.0327547	0.0506245	0.0223536	0.0881994	0.0267503	0.0145076	0.0765752	0.0139946	0.142872
4.2	0.307971	0.0609295	0.211799	-0.0279613	0.24103	0.134696	0.0189725	-0.00628755	0.0962496	0.0826045	0.153636	-0.0400426	0.0659689	0.0626667	0.0152523	0.275405	0.0194356	-0.118679	-0.0165764	0.07943	0.148211	-0.0129148	0.0200656	0.074194	0.0855458	0.14102
4.22	0.231731	0.0289016	0.225022	0.115159	0.19332	0.0500168	-0.0178245		0.108643	0.0732885	0.131314	0.00298991	0.00392212	-0.00325099	-0.00794215	0.100111	0.0141217	0.155584	0.0208501	-0.0204707	0.109266	0.0201938	-0.0367118	0.0521398	-0.0659616	0.177159
4.24	0.260118	0.0751917	0.168453	0.0603314	0.261604	0.0693578	0.0358122	-0.0122702	0.104432	0.0472096	0.150889	0.0393015	0.00996512	0.0291668	0.0642687	-0.0485234	0.0220618	-0.119464	-0.00335915	0.0575685	0.152163	-0.000675052	0.000582608	0.06025	0.0026994	0.180558
4.26	0.27673	0.0161467	0.14612	0.0031749	0.222277	0.101255	-0.0016415	-0.0109464	0.108503	0.0822564	0.150174	-0.038725	0.139475	-0.0188071	0.0576491	0.127035	0.0564198	-0.0568912	-0.00429677	0.0637449	0.124944	-0.00854783	-0.0249652	0.0603612	0.0369334	0.119987
4.28	0.304495	0.00758779	0.165806	-0.0411126	0.226239	0.0186702	-0.00176997	-0.00184657	0.115219	0.0708044	0.159912	-0.0353647	0.0628424	0.0229497	-0.00534543	0.10506	-0.0526341	-0.0535549	0.00315372	0.00831102	0.0890903	-0.0681579	0.0353902	0.0423293	-0.00808101	0.142809
4.3	0.261735	-0.0317941	0.2077	0.00238801	0.331108	0.149945	0.0210485	0.00982092	0.120736	0.0545594	0.150511	-0.0123918	0.0255431	0.0201891	-0.0064016	0.0049697	-0.0331885	-0.0412586	-0.00792059	0.0116312	0.019329	-0.0249969	-0.0025859	0.0772621	0.0464821	0.14091
4.32	0.227475	0.0772138	0.218163	-0.114269	0.261021	0.0965819	0.0105659	-0.0512207	0.121461	0.052046	0.139348	-0.0368936	0.0125163	0.00828417	-0.0329481	0.147087	-0.0882024	-0.0366517	-0.022158	0.0580813	0.0821015	-0.0110643	0.0524794	0.0573747	-0.0551553	0.201296
4.34	0.312066	0.0497026	0.177421	-0.028551	0.236018	0.0659331	-0.0179595	-0.0335551	0.0948693	0.0851013	0.154116	0.0272511	-0.0406101	0.0348743	0.024331	0.101386	0.061498	-0.0743005	0.0296732	-0.0316739	0.104581	0.0357081	-0.0349086	0.076972	0.0154962	0.204176
4.36	0.304536	0.0842407	0.189454	0.123496	0.26478	0.12551	0.0130267	-0.00228628	0.120168	0.0560442	0.114587	-0.0266728	0.023932	-0.0206785	0.0426125	0.123607	-0.0226382	-0.0377606	-0.015604	-0.0430101	0.10935	0.043055	-0.00181817	0.119336	0.0411427	0.160879
4.38	0.24537	0.0322032	0.171172	-0.0111002	0.217104	0.164383	0.0161681	-0.00850606	0.0947763	0.0618277	0.162963	0.00587693	0.00813697	0.00554868	0.0294433	0.193249	-0.00027752	-0.011215	-0.00616227	0.0295727	0.0587187	-0.00949171	0.00753114	0.0803974	0.00643088	0.200441
4.4	0.318491	0.0348191	0.170348	0.091091	0.257041	0.0132359	0.0120423	-0.00726173	0.107809	0.0198136	0.145169	-0.049821	0.0379725	0.0153527	0.0278586	0.118308	-0.0453964	-0.0253209	-0.0142205	0.0541494	0.0950496	-0.00254835	0.0110885	0.0855967	0.0351022	0.209463
4.42	0.226876	0.0780629	0.214458	-0.0423282	0.226357	-0.00576658	0.0048714		0.108451	0.0396174	0.168984	-0.00421391	-9.045e-05	0.032503	0.00475484	0.0570432	-0.0746755	-0.0148915	0.0160526	0.0249408	0.0617639	0.0265547	-0.00409288	0.102842	-0.0679456	0.129416
4.44	0.253038	0.0534307	0.227344	0.088391	0.213469	0.0696837	0.0153701	0.00319417	0.125324	0.0337843	0.145692	-0.0634708	0.0762202	0.0369196	-0.0164348	0.137095	-0.0023499	-0.113997	-0.0103703	-0.0387952	0.0805225	-0.0126264	-0.0126471	0.0460007	0.0539552	0.130979
4.46	0.265299	0.0795979	0.20303	0.100892	0.274807	0.0868257	-0.0204808	-0.0224482	0.123098	0.0887794	0.140154	-0.0481582	-0.0168019	-0.00835359	0.0142981	0.15833	-0.0518915	0.116632	-0.0128867	-0.0826832	0.154451	0.00685128	-0.0366501	0.0431341	-0.0638917	0.174382
4.48	0.275936	0.0529264	0.215324	0.00155501	0.253326	0.12799	0.0287947	-0.0391554	0.113518	0.0192556	0.145811	-0.0334675	0.0339231	0.0363113	0.0335663	0.203094	-0.0169965	0.0134493	-0.0163463	-0.0694562	0.105752	0.0595474	0.0154266	0.111863	-0.00959035	0.196392
4.5	0.262764	0.0547787	0.203383		0.207253	0.122652	-0.0413316	0.0137045	0.117267	0.0381092	0.162241	-0.0178912	0.0450964	0.0269759	-0.013863	0.155874	0.0850285	-0.0181032	-0.0172215	0.0240307	0.0435823	0.0607937	-0.0277665	0.0375943	-0.039335	0.189272
4.52	0.290049	0.0464568	0.227814	0.0606437	0.252679	-0.0313812	-0.00270474	-0.00860498	0.127017	0.0272251	0.154076	-0.0176535	-0.0106324	0.0227597	0.0227546	0.209606	0.0396378	-0.0821497	0.051599	-0.0268694	0.0601575	-0.0344082	0.0196848	0.0320418	0.0401667	0.223523
4.54	0.249343	0.0618351	0.22108	0.0480607	0.254777	0.125117	-0.00853085	-0.0100231	0.127988	0.0716393	0.132083	-0.0436195	0.0173547	0.0233358	-0.0168802	0.107488	0.00954174	-0.00659639	-0.00789284	0.0305604	0.105766	-0.0281018	0.0128885	0.095595	0.0422279	0.194356
4.56	0.251757	0.0124276	0.19589	0.084712	0.240748	0.00546348	0.00665696	0.00226529	0.113984	0.0421472	0.133213	-0.0416077	0.0646515	0.0420083	-0.0476001	0.195515	0.0233645	0.0939373	-0.0138174	-0.00778322	0.122317	0.047848	-0.0181524	0.0349608	0.0276532	0.158801
4.58	0.293964	0.055948	0.206176	-0.00228355	0.263743	0.155787	0.0268848	-0.0126095	0.0988151	0.0511786	0.111769	-0.012027	0.0553176	-0.00907207	-0.0130309	0.108071	0.108573	-0.0653168	-0.014345	0.0582547	0.126815	-0.124611	0.0235986	0.071115	0.0611688	0.248021
4.6	0.270899	0.074256	0.169051	0.0251911	0.198703	0.0192622	0.00351824	0.012574	0.125606	0.0687205	0.129466	-0.0258579	-0.0241965	0.0316589	0.0206641	-0.0181605	-0.0419408	0.067999	-0.00872755	-0.0172081	0.120655	0.0288067	-0.0147912	0.0590066	-0.0415586	0.143242
4.62	0.279765	0.0769157	0.238356	-0.0601681	0.232785	0.052285	0.0164308	0.0114688	0.102455	0.0773982	0.13993	0.0135653	-0.0107114	-0.00431316	0.00473177	0.0574528	0.0983202	-0.00634552	-0.0255974	0.0829482	0.0808571	-0.00643442	0.0485442	0.0428308	0.0240769	0.23536
4.64	0.286121	0.0790663	0.1734	0.0190339	0.226219	0.0355905	0.00764143	-0.028972	0.112433	0.0733907	0.128357	-0.00608975	0.0452248	-0.00676254	-0.0260384	0.119327	0.081213	-0.120383	-0.00290239	-0.013903	0.0834935	0.017596	0.0218196	0.0579152	-0.0150678	0.204716
4.66	0.254318	0.0439075	0.183743	0.0454117	0.246215	0.0497461	-0.0196243	-0.00676434	0.132938	0.042247	0.110575	0.0153887	-0.0375523	-0.00801017	0.0232647	0.207828	-0.054513	0.0690316	0.00256005	-0.028007	0.0878295	0.0202198	-0.0176027	-0.030545	-0.0277945	0.224271
4.68	0.238769	0.0414306	0.204957	-0.0035786	0.234956	0.0992403	0.0166837	-0.0139585	0.118622	0.05153	0.145769	-0.0536885	0.0229036	0.00492719	0.0390685	0.134367	0.00442695	0.161265	-0.0126123	0.0146837	0.104631	0.016027	0.0111728	0.0437161	0.00641443	0.230164
4.7	0.212108	0.0597713	0.208652	0.0863455	0.28414	0.191655	0.0218737	0.002079	0.100257	0.0563002	0.136236	-0.0117371	-0.0221457	0.0362387	-0.00284975	0.192337	0.0551201	-0.0382655	0.000327623	0.0222602	0.0463977	0.103495	-0.0067976	0.0821355	-0.0246708	0.172657
4.72	0.248677	0.0421671	0.191407	0.19857	0.242048	0.121554	-0.0063262	0.0274251	0.0890255	0.0764561	0.135256	-0.00245796	0.0355792	0.0274845	0.0341217	0.219595	-0.0394564	-0.011781	-0.0278318	0.0324818	0.0926156	0.116434	-0.00171039	0.0519825	0.0147587	0.195963
4.74	0.257477	0.0674445	0.183178	0.11094	0.16958	-0.0116914	0.00284929	0.0147592	0.110631	0.0389551	0.11709	0.0543669	-0.00796888	0.0164905	0.0544606	0.101635	-0.0185849	0.136077	0.0293693	-0.0678969	0.0618466	0.0204391	0.00625094	0.0839374	-0.0749921	0.170454
4.76	0.28215	0.0940842	0.106597	-0.0135381	0.230975	0.137611	-0.00973434	-0.0132505	0.110646	0.0673544	0.147001	0.00138625	0.0246328	0.00310606	-0.0269088	0.133906	-0.000990015	0.119352	-0.00359241	0.0525313	0.166669	0.0894873	0.00180709	0.0540767	-0.0648011	0.155415
4.78	0.261787	0.0438809	0.20508	0.0145798	0.247276	0.111813	0.0234502	-0.00326976	0.106314	0.0712011	0.147863	-0.0605255	0.0405322	-0.00213312	0.0772286	0.131968	-0.0218338	0.0787643	0.0249204	0.0273446	0.123982	-0.0492481	0.0292196	0.0711305	-0.0669062	0.220069
4.8	0.257801	0.014255	0.217598	0.067364	0.250606	0.150465	7.0106e-06	-0.0236573	0.122525	0.0618492	0.11439	-0.00332485	-0.0289586	0.00728889	0.0533296	0.0494017	-0.0632113	-0.0886981	-0.010074	0.0355231	0.0796044	0.0391058	0.0277306	0.0742439	-0.0528285	0.203647
4.82	0.215716	0.012842	0.169356	0.00482233	0.149486	0.0568278	-0.00420471	-0.0126136	0.126752	0.0945548	0.151818	-0.00116699	0.0287793	0.0275125	-0.0559289	0.14885	0.0683195	-0.0335756	3.49481e-06	-0.0934823	0.10045	-0.010593	0.0831202	0.0625572	-0.0120759	0.174756
4.84	0.235769	0.0417882	0.173557	-0.0478357	0.250801	0.10511	0.0108171	-0.00818004	0.101334	0.0392052	0.116526	-0.04056	0.0219964	-0.00456483	0.0218405	0.152062	-0.0149435	-0.0272574	-0.00920066	-0.0386315	0.100897	0.0161707	-0.00912302	0.0665091	-0.00131364	0.142597
4.86	0.242868	0.0978036	0.184602	0.182651	0.192237	0.106959	-0.00871256	0.0189298	0.132154	0.0436377	0.113389	0.0210947	0.0720179	-0.0302954	0.0244396	0.119254	0.07257	-0.070124	0.00363821	0.0516876	0.132785	0.00135928	-0.00179911	0.0609719	0.0114668	0.180663
4.88	0.263596	0.0259784	0.218325	0.0224718	0.176087	0.15215	-0.00391052	-0.0098531	0.0866301	0.0398338	0.147644	0.0123714	-0.0298829	-0.0193987	-0.02207	0.0999148	-0.0599025	-0.0258418	0.00936164	0.0701278	0.0658644	-0.101981	0.0061051	0.0612911	-0.108653	0.146327
4.9	0.246619	0.0798382	0.173205	0.0848677	0.192312	-0.0901957	-0.00875156	-0.0226037	0.121352	0.0664387	0.142143	0.00459736	-0.00159038	0.0345589	-0.0562024	-0.0458347	0.0452892	-0.0488278	-0.0233517	0.035746	0.0718288	-0.00597898	-0.00559109	0.0862717	-0.000974313	0.172294
4.92	0.210264	0.0584362	0.187611	0.0486351	0.215376	0.0993584	0.0379706	-0.0240778	0.12127	0.0285305	0.110529	0.028865	0.093639	0.0268909	-0.032033	0.0823596	0.0541386	-0.0302673	0.0180127	-0.0143824	0.0658459	-0.114591	-0.0297126	0.0376628	0.00686888	0.175715
4.94	0.26585	0.0104628	0.210891	0.039735	0.204995	-0.00459246	-0.00470205	-0.0161169	0.106194	0.0333926	0.12849	0.0432046	0.0358084	-0.0158928	2.25714e-05	0.0932365	0.0442732	0.104469	-0.0213853	0.0212974	0.16884	-0.00948294	-0.00230564	0.0593536	-0.0676462	0.174945
4.96	0.205044	0.0646282	0.16959	0.103659	0.177101	0.113716	-0.0248469	0.00170404	0.102852	0.019418	0.153055	0.0475737	0.0789216	-0.0174708	0.0442205	0.0972082	0.0638537	-0.0459404	-0.0231234	-0.00114214	0.101971	0.000496881	0.0134968	0.136227	-0.045886	0.165673
4.98	0.252263	0.00718886	0.168838	0.0712177	0.250088	0.0300438	-0.0209794	0.00333254	0.11001	0.0371005	0.131386	0.0516658	-0.0438689	-0.00298429	-0.000735618	0.129917	0.0954251	-0.0719822	-0.00434124	0.0464332	0.0380223	-0.11487	0.0032326	0.069301	-0.0176473	0.137985
5	0.241921	0.00445773	0.206005	0.0894199	0.190762	0.125671	-0.000829179	-0.0192326	0.103514	0.0585607	0.13292	-0.0141906	0.105768	0.00375142	-0.0180838	0.0605283	-0.030594	0.0333188	-0.0103356	0.0687802	0.0413344	0.0940803	-0.0191134	0.106232	-0.144791	0.189711
5.02	0.2123	0.0803566	0.228248	-0.0149223	0.204281	0.0632019	-0.0228627	0.0111202	0.113138	0.0466026	0.151782	-0.00811685	0.0186342	0.00384873	-0.0641215	0.113163	-0.0146313	-0.0261901	-0.0222437	-0.0410204	0.0276296	-0.0148281	-0.0216376	0.0756391	-0.0129681	0.149835
5.04	0.263844	0.0340425	0.191659	-0.0275267	0.179944	-0.0588942	-0.00207568	-0.00998153	0.11055	0.034311	0.120219	0.116329	-0.013838	-0.0145531	0.00509479	0.12263	0.048073	-0.0481958	-0.0213691	0.0840693	0.0274684	0.0624102	0.0105638	0.0815677	-0.0418309	0.169051
5.06	0.261191	0.0372472	0.167407	-0.0459637	0.203225	0.0391641	0.00595865	0.0235472	0.110738	0.0388257	0.120622	0.0427332	0.054521	0.0434993	-0.0486311	0.146736	0.0611836	-0.10603	0.00874744	0.00201338	0.102942	-0.00133968	0.0461743	0.0726536	-0.0119076	0.135171
5.08	0.269799	0.0175285	0.167701	0.0464067	0.220169	0.00279225	0.0198422	-0.00711834	0.116144	0.0608758	0.122172	0.032573	0.0381767	0.00208552	0.0453275	0.0396707	-0.0284325	0.00625376	0.0206121	0.0262236	0.116626	-0.00818247	0.0090238	0.040314	-0.0859555	0.152104
5.1	0.179168	0.0653287	0.198196	0.162596	0.181639	0.0813413	-0.0233821	-0.0119053	0.13341	0.0259134	0.115069	-0.0197106	0.0338179	0.0156519	-0.0292035	0.218034	0.0345576	0.129746	-0.0171095	0.010262	0.091523	0.0451509	0.0631136	0.0447614	-0.0799009	0.108713
5.12	0.243134	0.0588617	0.225093	0.132154	0.162281	0.178078	0.0181317	0.00869598	0.126942	0.0482132	0.15103	0.0401835	-0.0222748	-0.00852522	0.0245233	0.0635046	-0.00298161	0.0256095	-0.0186195	0.0217876	0.0621947	0.0141206	-0.0344332	0.0220696	-0.0100191	0.154611
5.14	0.260115	0.0608373	0.179786	0.0807393	0.236108	0.0181362	-0.0151091	0.0250796	0.103629	0.0410639	0.144643	-0.0257388	0.0385803	-0.0107728	0.037781	0.0267643	0.0864189	-0.0730485	-0.0119462	-0.0324791	0.108311	0.027757	0.00424822	0.0802367	-0.021546	0.144368
5.16	0.245897	0.0208441	0.213027	0.16639	0.276889	0.134663	0.0518211	0.00937542	0.113247	0.0641818	0.129249	-0.021556	0.0370985	0.0212116	0.0099445	0.102392	0.00333792	0.15404	-0.00625131	0.0329175	0.0393413	-0.00784605	0.0532779	0.061883	0.013709	0.171977
5.18	0.242642	0.0476419	0.199821	-0.0575653	0.244187	0.113796	0.0119409	-0.00880058	0.113268	0.0497228	0.155243	-0.0525919	-0.00336122	0.00561361	0.0312937	0.0927622	0.0331547	-0.0085219	0.0526799	0.0620095	0.0927739	-0.082467	-0.0404834	0.0795645	0.0160999	0.103108
5.2	0.25803	0.0260073	0.177584	0.061833	0.264378	0.0788386	0.0266327	0.0104686	0.0891616	0.0420343	0.174594	-0.00353286	0.124157	0.0400978	-0.0280772	0.145846	0.0185158	0.00975466	-0.000702941	0.00144255	0.0412518	-0.086841	0.0376956	0.0576504	-0.0442438	0.142256
5.22	0.291314	0.00320501	0.199611	-0.0534151	0.392286	-0.0853935	-0.00380525	-0.014515	0.0901792	0.0856548	0.110271	0.0459747	0.143669	0.0377021	-0.0204207	0.153795	0.0394252	-0.0104123	-0.0110172	0.0329826	0.10931	0.0312135	0.0449452	0.042044	0.0862322	0.155244
5.24	0.193408	0.1056	0.175762	-0.0239017	0.175138	0.0176174	-0.021112	-0.0160582	0.101443	0.0588281	0.110554	-0.00780714	0.0151905	0.00679043	-0.0628699	0.130101	0.0139692	0.14043	0.0147072	-0.0136409	0.112296	-0.00874893	-0.0481637	0.0498541	-0.107945	0.147077
5.26	0.228173	0.0748138	0.165851		0.289948	-0.0102641	-0.0277164	-0.0144419	0.087335	0.0567051	0.111557	0.039386	0.0224713	-0.00529205	0.0383852	0.200803	0.0643801	-0.0710805	-0.0450373	-0.00869843	0.139905	-0.131642	-0.0274987	0.0529844	-0.0707072	0.183278
5.28	0.240819	-0.0345835	0.197091	0.0251889	0.206684	0.0361417	0.0393247	0.00649989	0.0811441	0.0193012	0.14563	0.0361776	0.102619	0.0223606	0.0257197	0.281533	-0.037447	0.0337672	0.00529824	0.0148365	0.106009	0.0105472	0.00210973	-0.00206872	-0.0304312	0.130912
5.3	0.260798	0.0244192	0.154568	0.161518	0.210017	0.169256	0.0273764	-0.00690639	0.0859359	0.0095889	0.132488	0.0122073	-0.0369334	-0.00323563	-0.00560938	0.181164	0.0698671	0.0311372	-0.0127963	0.00492768	-0.00388797	-0.015729	0.0765849	0.0173799	0.00118945	0.134984
5.32	0.239604	0.0454223	0.146666	0.0734566	0.267085	0.0538237	0.0146042	-0.00908939	0.0759529	0.0604419	0.157672	-0.0288355	0.0193843	0.0237098	0.00108007	0.0931736	0.00393263	-0.0883841	-0.00092039	0.00163696	0.0626141	0.0300206	-0.0183496	0.05939	-0.0902025	0.120463
5.34	0.270545	0.0540706	0.215399	0.134118	0.258527	0.139487	-0.00836468	0.000314265	0.119027	0.0492105	0.200578	-0.00133055	-0.0587408	-0.0119599	-0.0401478	0.318259	-0.0462589	-0.0644207	-0.0138144	-0.03334	0.0139341	0.00769258	0.039278	0.0988757	-0.0115177	0.180544
5.36	0.257872	0.0397383	0.171942	0.126865	0.231196	0.122729	-0.0206591	0.00786596	0.128041	0.0600422	0.152609	-0.0289739	0.0176221	0.0242588	-0.0490467	0.133449	-0.0193068	0.0260059	-0.00318254	-0.0335283	0.0745882	0.0890017	-0.0133118	0.0667476	-0.0852156	0.179174
5.38	0.237919	0.0309077	0.197558	0.0393896	0.26611	0.024252	-0.017569	0.0211664	0.11542	0.0244209	0.117984	0.0485315	0.00600711	0.00545635	0.0118397	0.103874	0.0254083	0.120606	0.0196513	-0.0508236	0.0322613	0.123086	0.0196158	0.024317	-0.028872	0.199785
5.4	0.259742	0.0548602	0.154657	-0.00214579	0.141017	0.166529	-0.0284018	0.00282302	0.0931852	0.0889602	0.128118	-0.0144949	0.0537266	0.0214665	-0.00842842	0.135794	-0.0198115	-0.012844	-0.0068824	-0.0321222	0.0405369	0.0315888	-0.0479892	0.0719027	-0.0271366	0.124133
5.42	0.251535	0.0208308	0.15395	0.0958254	0.321708	0.0501802	0.0136398	-0.00573874	0.121888	0.0477709	0.127612	0.0133776	0.0809036	0.023167	0.0107001	0.132516	0.0498565	0.0215621	-0.0155007	0.0432684	0.0665048	0.0755422	-0.0479028	0.0478855	0.0713258	0.152253
5.44	0.235155	0.0281655	0.161315	0.139896	0.29095	0.0594957	-0.00977602	0.00323947	0.122154	0.0910153	0.154942	-0.0508483	-0.0477946	0.00476139	0.0200674	0.0864363	-0.0247438	0.0119816	-0.00583071	-0.00398674	0.0226681	0.00391143	0.0362036	0.0811956	0.0182696	0.0919715
5.46	0.275816	0.06461	0.204925	-0.0712424	0.19135	0.0554811	0.0202304	0.00494141	0.0810659	0.0269899	0.112985	-0.043281	0.0328523	-0.00321475	0.0129522	0.107155	0.0734632	0.0793603	-0.044384	-0.0161012	0.0803247	0.0158415	0.010616	0.0540207	-0.0196082	0.0999968
5.48	0.24704	0.0546594	0.156423	0.0974523	0.245652	0.0316979	-0.00231822	0.00694746	0.113626	0.0762187	0.0926305	0.028698	0.00319176	-0.0110137	0.0103354	0.161058	-0.0356417	0.0788893	-0.0434749	-0.0641773	0.0532657	-0.0471744	-0.00054547	0.0765681	0.0186557	0.158603
5.5	0.164957	0.0483743	0.156122	-0.0227121	0.269562	0.168792	0.00578356	0.0106554	0.117875	0.0295417	0.121538	0.00275855	0.0844867	0.0181255	0.0343995	0.199146	-0.0013536	-0.0875708	-0.0101984	0.0276741	0.0933569	0.0492074	0.00960157	0.0577382	0.00188773	0.116209
5.52	0.279026	0.0933092	0.20375	-0.0160265	0.213819	0.10854	0.029298	-0.0032171	0.11476	0.0169613	0.120009	0.00426747	0.0280476	-0.00213193	0.0211347	0.113809	-0.0473478	-0.0719533	-0.0162807	0.0211223	0.0886486	-0.0628518	0.0140272	0.0734605	-0.0580437	0.180914
5.54	0.21784	0.0608361	0.181094	0.152688	0.20676	-0.0149757	0.0272058	-0.0219659	0.118427	0.0486825	0.137161	0.010991	-0.0479396	0.0174297	0.0283045	0.021622	-0.0155111	-0.0684078	-0.0305929	-0.0478323	0.0640809	0.055725	0.0477695	0.0657031	-0.0249456	0.121525
5.56	0.250155	0.0366253	0.194899	0.062227	0.170685	0.0260142	0.00444207	0.0151585	0.0934715	0.00602466	0.112556	0.0369065	0.0497634	-0.00507418	0.0207122	0.158983	-0.0135471	-0.0768561	-0.0465158	0.0322547	0.0582963	0.00212475	0.0049451	0.105032	0.00366476	0.0994167
5.58	0.280799	0.0657093	0.143026		0.229615	-0.0151753	-0.00681258	-0.0144839	0.108171	0.0159449	0.11745	0.0417663	0.0929923	0.00482294	-0.00374189	0.1637	-0.0475064	0.0111944	0.0214381	0.00327582	0.109747	0.0157988	0.0426524	0.0176451	-0.000161388	0.100749
5.6	0.250485	0.0645046	0.211769	0.0647121	0.292692	0.0312254	-0.00123646	0.00119734	0.104338	0.0413731	0.136399	0.0146154	-0.000214012	0.0133934	0.00877494	0.0763347	0.0785481	-0.0295247	-0.0062955	-0.0479899	0.0301335	-0.0434734	-0.00698573	0.0287943	-0.0613009	0.157881
5.62	0.244896	-0.00278315	0.182704		0.23204	0.132449	0.0138598	0.00823821	0.113757	0.0353655	0.128008	-0.0394731	0.0119377	0.0837673	-0.003909	0.305901	0.0677653	-0.114406	0.0189858	0.0517668	0.076973	-0.0813779	-0.0895653	0.0361829	0.0408539	0.156508
5.64	0.22203	0.0745591	0.178016		0.161008	0.108976	0.00018272	0.000710207	0.109258	0.041154	0.12007	0.0293176	0.0191333	-0.000310718	-0.040089	0.167176	0.0215358	0.143032	-0.0192646	0.0347821	0.0553916	-0.0585589	0.0570604	0.101629	-0.00620157	0.131063
5.66	0.201775	0.0116149	0.194653		0.269453	0.0379776	0.0121455	-0.010077	0.116961	0.0630714	0.129715	0.0291581	0.000912316	0.0134623	-0.00329739	0.209622	0.056436	-0.0311647	-0.0235325	-0.0445224	0.0621627	-0.0587583	0.0289529	0.01144	-0.0361544	0.117022
5.68	0.208237	0.0608109	0.117862		0.175414	0.0107997	0.0117247	0.0127468	0.0911507	0.059041	0.148518	0.0189876	0.0456583	-0.0571457	-0.0113904	0.151384	0.0183656	-0.0545511	0.00400763	-0.0429728	0.134931	0.0282121	0.0370755	0.0536111	-0.0947335	0.117997
5.7	0.213422	0.0458514	0.205197		0.154329	0.126416	0.00479724	-0.0199048	0.0976412	0.0347473	0.117581	0.0015492	-0.0154124	0.0202525	-0.024765	0.154743	0.0320217	0.012006	0.0373297	0.0136492	0.0509368	0.0298294	-0.000161362	0.0178184	-0.0167897	0.148644
5.72	0.227534	-0.018864	0.162184		0.219406	0.0148181	0.0100949	0.0107558	0.10905	0.0535545	0.12602	-0.0132474	-0.0600507	0.0528873	0.0513074	-0.0148741	-0.0490066	-0.158663	-0.0131272	0.0367292	0.000952749	0.0637229	0.0202482	0.0690154	-0.0380416	0.147547
5.74	0.201993	0.0721584	0.167346		0.177069	0.126061	-0.00132955	0.0165774	0.111489	0.0730522	0.139698	0.0155746	0.109064	0.0310444	0.044476	0.192061	-0.0498988	0.121872	-0.0536047	0.0151605	0.06308	0.0261771	-0.00477974	0.0747324	0.0129638	0.0860949
5.76	0.249549	0.0394946	0.1728		0.233146	-0.0131162	-0.00337474	0.0127358	0.107201	0.0149768	0.130153	-0.0196062	0.0815416	0.0164289	0.0131059	0.0406114	0.0598291	-0.060279	-0.0100192	0.0401436	0.0610289	-0.0681148	-0.00459757	0.042968	0.0583985	0.112686
5.78	0.254444	0.0139374	0.122889		0.233497		0.010261	-0.000658394	0.113921	0.0193888	0.124637	-0.044141	-0.00746226	-0.0392869	0.00076097	0.184485	-0.0212265	-0.00991546	-0.00297303	0.0219275	0.0462555	-0.0669624	0.017967	0.0227291	0.0188735	0.145586
5.8	0.228544	0.0458171	0.176965		0.236806	0.125474	-0.0265195	-0.0205615	0.110348	0.0736142	0.148528	-0.0093939	0.0696369	-0.0117257	-0.0411805	0.134271	0.0435713	0.12506	0.0138759	0.0515505	0.0732256	-0.00238241	0.0368553	0.0526143	0.059768	0.154588
5.82	0.222204	0.0728233	0.169453		0.192321	0.0400639	0.0309634	0.0155571	0.10613	0.0664643	0.122671	-0.0451801	0.015181	-0.0283808	9.86494e-05	0.243311	0.00551544	-0.0230385	-0.0101549	0.0213517	0.114823	0.0340315	-0.00793296	0.0628814	0.153557	0.135464
5.84	0.254462	0.0247047	0.159714		0.175356	0.127335	-0.00172827		0.10748	0.0597822	0.108443	0.00267604	0.0987119	0.0243851	-0.0639735	0.0679512	0.0476336	0.020963	-0.00798568	0.0249175	0.0258016	-0.0373184	0.0205562	0.0389271	-0.0298543	0.118686
5.86	0.238291	0.0882051	0.169673		0.213667	0.0911271	0.0487721	0.00330831	0.10434	0.0814202	0.117607	0.0358964	0.00471036	0.0168567	-0.0402053	0.0959877	0.0459365	0.126485	-0.0283679	-0.0283603	0.112519	0.067922	-0.0259818	0.104301	-0.0512952	0.142449
5.88	0.218735	0.0802615	0.16577		0.239145	0.0836438	0.0218201	-0.00051499	0.10544	0.0712895	0.118187	-0.0168795	0.0558503	-0.0425018	0.0100957	0.182528	-0.045181	0.0478957	0.0231949	0.00596557	0.123965	-0.0274427	0.00561125	0.0498108	-0.0447257	0.1471
5.9	0.178524	0.0148009	0.146793		0.269288	0.0374833	0.0179186	-0.00286225	0.12672	0.038044	0.13812	-0.0213648	0.11003	-0.0116966	0.0344162	0.175125	-0.0793297	-0.0462663	0.0308434	0.0906802	0.0650911	0.0590618	0.0269586	0.0291157	-0.00974847	0.107099
5.92	0.246787	0.056002	0.18598		0.225211	0.140607	-0.00707275	-0.00166518	0.11492	0.00871886	0.141465	-0.0114576	0.0129137	0.0268614	0.0195324	0.201396	-0.0524892	0.0928012	-0.00597016	0.0102213	0.125237	-0.0128435	0.0552382	0.0285122	0.039003	0.135173
5.94	0.214866	0.0420099	0.152193		0.269368	0.12583	0.0200406	0.00517665	0.112253	0.0414546	0.0970376	-0.0441513	0.0575337	0.0165922	-0.0514081	0.165216	-0.038715	-0.0609224	-0.0236312	-0.0290839	0.12455	0.145951	-0.0425217	0.040112	-0.0412634	0.0989724
5.96	0.256077	0.0145911	0.159098		0.214418	0.147267	0.00686901	0.00678588	0.116934	0.0581048	0.122642	0.0418624	0.0559935	-0.0225984	-0.0177157	0.122344	-0.0386905	-0.123541	0.00877304	0.0149693	0.0710528	-0.0120453	0.0259063	0.0120471	-0.116103	0.12966
5.98	0.206107	0.0380773	0.124297		0.229957	0.112585	0.000373048	0.023967	0.0936281	0.0516147	0.0965234	-0.0353355	0.00517676	0.0282889	0.0474321	0.0969735	-0.0843111	-0.115651	-0.00285073	-0.0533721	0.107062	0.112302	-0.0104404	0.0648569	-0.033356	0.203063
6	0.243934	0.0837087	0.155334		0.254061	0.0934962	-0.00223346	-0.00277049	0.0838223	0.0334687	0.138596	-0.00199899	0.0245835	0.00290252	0.0363345	0.0360394	-0.00081321	0.123678	0.000724568	-0.0149235	0.0149682	0.0349966	-0.0183222	0.0396094	-0.0488805	0.130327
6.02	0.206669	0.0606181	0.168329		0.166981	0.00721497	-0.0099585		0.0945686	0.0484458	0.139237	0.0774648	0.0356652	0.00872823	0.0157487	0.0539685	-0.0214251	-0.143998	0.00577649	0.050812	0.0487242	0.139256	0.00263356	0.0446207	0.0829086	0.112632
6.04	0.195671	0.0892768	0.188565		0.243612	0.025387	-0.0382914	0.000502928	0.109435	0.00492856	0.10452	0.0111786	0.034956	-0.0106497	-0.0199036	0.111273	0.0545567	-0.0749725	0.0299412	0.0469907	0.0273441	0.041795	-0.0258386	0.00894959	-0.0348041	0.202112
6.06	0.206125	0.0402367	0.202873		0.32898	0.116053	-0.0388168	0.0266371	0.103279	0.0403315	0.10891	0.0245169	0.0244274	0.0326955	0.037574	0.162609	0.0256691	0.0360533	-0.00921862	-0.0466532	0.0712329	-0.00430591	-0.0286055	0.0205297	-0.0368842	0.181156
6.08	0.211225	0.0640845	0.136731		0.228706	0.071576	-0.00391823	0.00512787	0.114319	0.0323047	0.125296	-0.0244753	0.0256955	0.0359294	-0.0217216	0.159897	0.0436443	-0.0871461	-0.0016305	0.0221122	0.0272317	0.0457642	-0.0282712	0.0274601	-0.0172871	0.1262
6.1	0.167282	-0.0213148	0.177475		0.241369	0.142593	0.00171979	-0.00253609	0.0941603	0.0555569	0.1417	0.0224299	0.0183723	0.0281319	-0.00452737	0.0492187	0.0560126	-0.0484125	0.0249632	0.00843031	0.0641996	-0.0161164	-0.0679505	0.0138287	-0.0341849	0.165796
6.12	0.272709	0.0231081	0.125695		0.218778	0.0474912	-0.0197316	0.00963133	0.0853911	0.0416952	0.137892	-0.0202624	0.00990766	-0.0447879	0.0150102	0.182936	-0.0129078	-0.074033	-0.0212057	0.00195198	0.106266	-0.0216625	0.0148019	0.0691083	-0.0410338	0.118262
6.14	0.235175	0.0344457	0.137121		0.303093	0.0528538	0.0192502	-0.0112724	0.101883	0.0420484	0.122237	0.023809	0.0404445	0.0460939	0.0520176	0.0972681	0.0700259	0.0632048	0.0252161	0.054998	0.010098	0.0626108	0.0307906	0.0220164	0.0582383	0.128139
6.16	0.22987	0.0309234	0.15938		0.18646	0.126753	-0.0136963	0.0129369	0.118651	0.0528462	0.104586	-0.041963	0.0295413	-0.00881991	0.0161674	0.315252	-0.00138363	0.0062418	-0.0135374	0.0424686	0.00936489	-0.0116572	-0.00874807	-0.00995528	-0.00641955	0.167613
6.18	0.161239	0.0595557	0.13528		0.211322	0.0732464	0.0106135	-0.00773446	0.111644	0.0189255	0.117514	0.0241423	-0.0111908	0.024788	-0.00605044	0.0603717	-0.0139973	-0.0889707	-0.0171444	0.00735041	0.0509273	-0.0414568	-0.0126673	0.00715838	0.0596587	0.132337
6.2	0.183922	0.0681152	0.205116		0.253285	0.0139287	-0.00455249		0.107843	-0.00787063	0.122446	-0.0057866	0.0189407	-0.0321031	-0.0385776	0.153926	0.00919921	-0.0279327	0.000980766	0.0338501	0.110058	0.00907737	0.0147103	0.079254	-0.00571257	0.154628
6.22	0.196241	-0.0410379	0.185389		0.227637	0.0619446	0.024189	0.00646422	0.102527	0.0301709	0.107458	0.0376206	0.0301891	0.0444833	0.0394591	0.0146409	-0.0187967	-0.00885264	0.00227602	0.0428402	0.121905	-0.100922	-0.0402811	-0.00627749	-0.0140709	0.158017
6.24	0.185861	0.0124983	0.173653		0.13472	-0.000643572	0.0025253	0.0124092	0.10554	0.0277265	0.115774	0.0322109	-0.00390027	-0.045412	-0.0493156	0.103775	0.0548969	0.0164436	-0.0266535	-0.0613658	0.0656786	-0.0680145	0.00820639	0.0326393	0.000705697	0.14366
6.26	0.207824	0.0362705	0.135241		0.156112	0.0199764	-0.00410523	-0.0362938	0.119089	0.0200042	0.0945951	-0.0487806	-0.0289309	0.0066061	-0.0182888	0.0455842	0.00748142	0.0770909	-0.0172475	-0.00248392	0.0775142	0.104543	-0.0386814	0.0921798	-0.0141483	0.157784
6.28	0.21756	0.0681927	0.188772		0.183919	0.119666	-0.00805588	-0.00458817	0.11135	0.0576328	0.125236	0.0204199	0.041926	-0.015495	0.0318693	0.116318	-0.0437179	0.00164669	0.00909644	0.0450809	0.0707196	0.00615435	-0.04865	-0.0133946	-0.0817512	0.174213
6.3	0.190549	-0.0333217	0.168811		0.250409	0.0032544	-0.00187394	0.0175593	0.116325	0.0158051	0.121233	-0.0334939	0.0225296	0.0215327	0.02335	0.0597087	-0.0235337	0.149475	-0.024118	0.00156379	0.0446141	-0.0370304	-0.00167558	0.0848703	-0.00617052	0.157663
6.32	0.203484	0.0141688	0.125139		0.238534	-0.0616387	0.0018398	0.00535884	0.0794811	0.0229926	0.113327	-0.00296931	0.000292741	0.00335149	-0.0215636	0.141655	0.0262334	0.00121298	-0.0279745	0.0196016	0.033952	-0.0275754	-0.0135654	0.0211362	0.0377967	0.120538
6.34	0.164427	0.00291066	0.186446		0.149802	0.0108892	0.0245428	-0.0128413	0.105129	0.0472029	0.126234	-0.0400515	-0.00434905	0.0204873	0.0218593	0.172793	0.0609879	0.0299369	-0.0393107	-0.0310667	0.0931348	0.00602423	-0.0318175	0.0505006	-0.0241708	0.126445
6.36	0.174472	-0.00912515	0.203933		0.22785	0.147574	-0.01312		0.101994	0.05158	0.104143	-0.0769547	0.0517734	0.0372273	0.0376977	0.118645	-0.0310197	-0.0542398	-0.0274861	0.00553395	0.119209	-0.0448539	0.0437474	0.0362297	0.0163848	0.138076
6.38	0.205076	0.0175301	0.173015		0.228982	0.0108264	-0.000493341	-0.0181169	0.0996531	0.0776397	0.112619	0.000771162	-0.0164149	0.0361669	0.0507031	0.23075	0.0636888	-0.0225152	0.0237785	-0.0245031	0.0532652	-0.0346974	-0.00439338	0.0355798	-0.0404353	0.148612
6.4	0.244102	0.0336804	0.232391		0.194698	0.0711053	-0.0219452	-0.0006486	0.11536	0.0419392	0.116276	-0.0278974	0.045927	0.0234697	-0.0187043	0.0582277	0.0356851	-0.124045	0.00476721	-0.0409061	0.0711494	-0.0591867	0.0169618	-0.0225672	-0.0769777	0.158235
6.42	0.208889	0.047565	0.139625		0.180098	0.0653173	-0.0222467	0.00626577	0.104637	0.0500352	0.105358	0.0339231	0.00232971	-0.0108539	-0.0556706	0.20589	-0.00312043	-0.0597911	-0.00980911	-0.0208895	0.0556481	0.0321165	-0.00280811	0.0955949	-0.00411278	0.170498
6.44	0.229566	-0.018231	0.172167		0.238677	0.00311289	-0.0183648	-0.0032876	0.119453	0.0423188	0.110379	0.0239935	0.00308677	0.016708	0.0182499	0.21005	0.00430597	0.110385	-0.0247664	-0.076961	0.0894648	0.0250156	-0.0246543	0.0318226	0.0258157	0.11312
6.46	0.202591	0.039446	0.189729		0.151817	0.00681173	-0.0202077	0.00250078	0.105807	0.038686	0.133505	-0.00379033	0.067865	-0.0191241	0.0346004	0.0745053	0.0156953	-0.0215672	-0.0230256	0.00702189	0.104694	0.0555561	0.00566296	0.0204083	-0.0378554	0.139028
6.48	0.206772	0.0177189	0.173161		0.241986	0.0152127	-0.00678631	0.000587378	0.111329	0.0372103	0.13389	-0.0144975	-0.0548287	-0.0237461	-0.0479355	0.0426711	-0.0387213	0.038848	-0.027239	0.0305256	-0.000877264	-0.0168454	-0.0337285	0.0641123	0.0501685	0.0653705
6.5	0.20665	0.0149684	0.138611		0.288074	0.0994002	-0.00614466	-0.00398716	0.110422	0.042631	0.120619	-0.00255893	0.0773468	0.0163071	0.0625544	0.125555	0.0556544	0.0567372	-0.0378049	0.0133023	0.0772008	-0.0305594	0.0222651	0.00734259	0.0460023	0.064905
6.52	0.190212	0.00605591	0.175918		0.205275	0.109083	0.0249578	0.010784	0.0999483	0.0457896	0.137284	-0.00263658	-0.0182761	0.0141289	0.0395642	0.0899509	0.000101893	-0.00921044	-0.00116295	-0.0199425	0.0267911	-0.044811	-0.0215663	0.0418725	-0.0830679	0.0967546
6.54	0.183476	0.0033339	0.177281		0.187416	0.08231	0.0159291	0.0180522	0.105748	0.0645945	0.134156	0.0219058	-0.021219	-0.00328768	0.0207176	0.0487693	-0.00655643	-0.0585316	-0.0101158	-0.0292321	0.141486	0.00526098	-0.07803	0.057085	-0.0734554	0.133853
6.56	0.23228	0.0149759	0.158285		0.233225	0.0920158	0.0109267	0.00582478	0.129071	0.0513063	0.104917	0.012996	0.000374991	-0.00874693	0.0195417	0.0380319	-0.0343358	-0.0715018	0.00519153	0.0310935	0.0204847	0.0124272	-0.00778265	0.052235	0.0431153	0.145251
6.58	0.186231	0.0819679	0.137449		0.26058	-0.0128804	-0.00512904	-0.00916978	0.0825922	0.0641748	0.139968	0.117307	0.0353582	-0.0221729	-0.00746422	0.00633279	0.0901681	-0.00648748	-0.034871	0.00741702	0.0117168	-0.07608	-0.0353145	0.0126822	-0.0649374	0.138862
6.6	0.163558	0.0447187	0.20788		0.250872	0.0698975	0.00128008	0.00405616	0.109446	0.043071	0.118272	-0.035952	0.0350628	-0.00799597	-0.0225954	0.222641	0.00696154	-0.113388	0.0196274	-0.0359594	0.0754121	0.0284765	-0.0100452	0.0983179	-0.0433299	0.0622905
6.62	0.204601	0.0491208	0.168463		0.261156	0.0852291	-0.0258257	-0.0201856	0.105623	0.0291269	0.134961	0.0423506	-0.0190648	-0.0107428	-0.00780125	0.112861	-0.0663068	-0.104026	-0.00203636	-0.000410501	-0.0150346	-0.0031435	-0.0530876	0.0810646	-0.0229101	0.0880976
6.64	0.201248	-0.0286739	0.144812		0.220706	-0.0300413	0.00484333	-0.0189044	0.116025	0.0173449	0.101157	-0.02826	0.0346705	-0.0442349	-0.0431318	0.151766	-0.0345716	-0.0225755	-0.00881761	-0.0554728	0.0449812	0.0590812	-0.0100002	0.00197573	-0.0859512	0.123738
6.66	0.21244	0.0442963	0.203644		0.177011	0.168012	0.040218	0.0163373	0.105382	0.0291417	0.109535	-0.0305302	0.087847	0.0125872	-0.0303653	0.121719	0.0985223	-0.133264	-0.0101954	-0.100238	0.0518599	0.0497864	-0.0164635	0.0636792	-0.0242995	0.112951
6.68	0.18206	0.0607261	0.124478		0.171554	-0.0254504	-0.0189157	-0.0424295	0.106628	0.0403457	0.12849	0.00243563	0.0562483	0.0224781	0.0208833	0.0263531	0.0108601	0.166717	0.00724467	-0.0361426	0.0178702	0.0347417	-0.0314289	0.0172167	-0.00450784	0.079733
6.7	0.190151	0.0689845	0.133269		0.22226	0.0223168	0.00735142	-0.0110243	0.104517	0.0372567	0.107436	-0.0109478	0.0444921	-0.0138155	0.0321201	0.032896	0.12379	-0.0363644	-0.0424527	-0.0564912	0.0449766	-0.0501857	0.00608607	0.0495573	-0.0537042	0.0250351
6.72	0.170482	0.0298312	0.13316		0.15994	0.162316	0.0218518	0.0019551	0.0890372	0.0716272	0.11117	0.0627186	0.0329357	-0.0167871	-0.0276957	0.186337	0.0176457	-0.0520514	0.00960837	0.00514825	0.0474239	-0.014445	-0.0182307	0.123663	-0.0262915	0.0832708
6.74	0.181	0.0352159	0.174337		0.198583	0.140239	-0.0388706	0.0122746	0.0917586	0.0523532	0.110766	-0.0211982	0.0437531	0.0301478	-0.0327436	0.108045	-0.0688387	0.0136871	0.0200263	-0.0362494	0.0434955	0.116744	-0.00137002	0.00367609	-0.0410788	0.166703
6.76	0.192704	0.0566299	0.175845		0.23718	0.0586219	0.00455496	-0.0149945	0.107013	0.0585183	0.120155	0.0335823	-0.015299	-0.00867668	0.00423362	0.252215	0.12071	0.139882	0.022822	0.0316847	0.0487541	0.0171151	-0.061769	0.0737561	-0.0349944	0.0782777
6.78	0.206556	0.0510157	0.165395		0.303538	0.214107	0.00527582	-0.00551266	0.0761123	0.0485117	0.102852	0.0236143	-0.00180555	0.0522538	0.0368819	0.0116638	-0.00335986	-0.00547652	0.021101	0.00709431	0.0710686	-0.0486239	-0.0166923	-0.00474432	0.00658645	0.0917085
6.8	0.185888	0.0597945	0.165204		0.222552	0.0627605	-0.00868339	-0.00549769	0.0974792	0.0377996	0.126284	-0.0272342	-0.042613	-0.0119577	0.00704466	0.146821	0.00828849	0.0258477	-0.000856327	-0.0214659	0.081031	-0.0261554	-0.0153115	-0.0490831	-0.0198958	0.0803094
6.82	0.240031	0.0115937	0.206005		0.151065	-0.0892421	0.0299388	-0.0361121	0.115715	0.0574201	0.105827	-0.0460391	-0.015764	0.0248555	-0.00263452	0.0448256	0.0516216	-0.0641014	-0.0130155	-0.042159	0.00546212	-0.0453935	-0.0155745	0.0834716	-0.0148706	0.132704
6.84	0.209159	0.0603323	0.10013		0.207075	0.0133492	-0.0153886	-0.000918099	0.0926363	0.0626725	0.0991984	-0.0536979	-0.0268781	0.0330842	0.0208803	0.0855918	0.0169479	0.146101	0.038157	-0.00820123	0.0200094	-0.00476777	-0.0231985	0.0535265	0.00477577	0.0789182
6.86	0.211287	0.0794812	0.166198		0.202154	0.154083	0.00201357	0.0232872	0.0994101	0.0254703	0.121361	0.0574761	-0.0299455	-0.00103964	-0.0190884	0.140112	0.0322682	-0.0584074	-0.0177804	0.0372962	0.0060181	-0.0809881	-0.0402252	0.0557095	-0.0185586	0.136695
6.88	0.196919	0.0367452	0.165809		0.159709	0.156859	0.0155656	-0.00788309	0.114935	0.0248763	0.114492	0.0152424	-0.0416243	0.00356712	0.0460154	0.223676	-0.0347475	-0.0499489	-0.0164204	0.0628664	0.0190607	0.0337917	-0.0461752	0.054059	-0.00144938	0.114667
6.9	0.201329	0.0323045	0.183005		0.289151	0.168956	0.0143706	-0.0208818	0.107	0.0468972	0.101468	-0.0456871	0.00933124	-0.0329532	-0.0426715	0.108885	-0.0143651	-0.19401	0.0379861	0.046725	0.0836304	0.0279185	-0.0402167	0.0475568	-0.0262687	0.151211
6.92	0.198875	0.0315397	0.178963		0.212302	-0.018786	-0.00416116		0.110633	0.0498945	0.0869104	0.0254254	-0.0148274	0.0157367	-0.0243291	-0.0538342	0.0397781	-0.115176	-0.040397	-0.000465905	0.0391607	0.0221216	-0.0606639	0.0595445	0.0778263	0.124875
6.94	0.208728	0.0410659	0.206786		0.210699	0.0521825	0.00279522	0.00351688	0.0897524	0.0558202	0.124955	-0.0201999	-0.0181636	-0.00775848	-0.0195519	0.28365	0.0211337	-0.0741065	0.0136287	0.0105288	-0.010882	0.118285	-0.0107065	0.0793763	-0.00752011	0.0659024
6.96	0.204083	0.0269173	0.144157		0.157796	0.12131	0.00982895		0.101292	0.0548925	0.129828	-0.00397323	0.000558792	0.0128325	-0.00919477	0.239042	-0.0322212	-0.206646	-0.00773342	0.0421495	0.0805592	0.0247278	-0.027898	0.0430641	-0.0591691	0.0874078
6.98	0.215903	0.0314337	0.152798		0.198084	0.124693	-0.0021291		0.11089	0.0171004	0.120474	0.0439391	0.0471921	-0.0120554	0.0233742	0.0436575	0.115117	-0.117353	-0.00137273	-0.0130144	0.0638212	-0.0646346	-0.0186363	0.105457	0.0103139	0.107144
7	0.210915	0.0206912	0.162794		0.228969	0.135742	-0.00250837	-0.00323518	0.102591	0.0447444	0.0956142	0.0103781	0.008218	0.0240979	0.0256222	0.108854	-0.00741279	0.158522	0.0576651	-0.00315248	0.0616654	0.0270636	-0.0856707	0.0534073	0.00976276	0.0574559
7.02	0.198398	0.0383363	0.158921		0.254713	0.0871953	-0.0244421	-0.0109156	0.11044	0.0362211	0.113904	-0.000366391	-0.0461298	-0.00527885	0.0431619	0.0354032	-0.0059181	0.0502683	0.0156047	0.0425797	0.0707214	-0.0171035	0.00230395	0.0765258	-0.0489133	0.0901611
7.04	0.240971	0.0358257	0.154206		0.229894	0.0980542	0.014544	0.0214399	0.0969773	0.0367808	0.154632	0.0144322	0.0950475	-0.0473219	0.0183081	0.190857	-0.0900399	-0.0258871	-0.00124025	0.00353587	0.086052	0.00438405	-0.0104	0.0237688	-0.0156472	0.100979
7.06	0.207979	-0.00361646	0.192896		0.210888	0.0227255	0.00219059	-0.0105752	0.0803796	0.0475828	0.0986972	0.0320964	0.0270773	-0.0290713	-0.0230872	0.0357659	-0.022696	0.0615731	-0.0247248	0.0186265	0.0322812	0.0110031	-0.0330767	0.0663611	-0.0630767	0.0773279
7.08	0.174302	-0.00394915	0.161887		0.141983	0.114676	0.0251482	0.0114264	0.106718	0.0527428	0.127022	-0.0163367	0.00537828	-0.00970889	0.0260488	0.085959	0.0407303	-0.0232696	-0.0420628	0.0585128	0.0487878	-0.0757823	-0.00441017	0.038607	0.026429	0.0689369
7.1	0.205138	0.0354797	0.104907		0.215816	-0.0383229	-0.00259566	0.00730751	0.096605	0.0469333	0.121735	-0.0243287	0.0207028	-0.0362817	0.0488655	0.253016	0.0451433	0.120304	-0.00583307	0.0379504	0.0615771	0.11254	-0.023536	-0.0190915	-0.0148091	0.0963764
7.12	0.165173	0.0308329	0.146918		0.221357	0.0374791	-0.0047685	-0.0199827	0.11448	0.0660892	0.112915	0.0216429	0.0113058	0.0128139	0.0102703	0.0806601	-0.0306007	0.109074	-0.0217748	0.00880243	0.025091	-0.0347782	0.00478693	0.042082	-0.0832128	0.0971734
7.14	0.19102	0.027132	0.176649		0.292658	0.096007	0.0047053	0.0134085	0.104971	0.0505035	0.0993563	-0.029433	0.000387551	0.0160719	0.0351678	0.152329	-0.0135625	0.058886	-0.0112458	0.011698	0.0455584	0.0282033	0.0533982	-0.0149479	0.00267345	0.127561
7.16	0.205158	0.0178358	0.148225		0.272811	-0.0168699	0.0412441	0.00182666	0.0746513	0.0455718	0.105732	0.0467671	0.0265635	0.0172697	0.014628	0.0224954	0.0902393	0.190299	-0.0345472	0.0269991	0.0314044	0.105349	-0.0272883	0.0588979	0.0667068	0.0934703
7.18	0.196723	0.118249	0.151494		0.248178	0.0275903	0.0149961	-0.00995519	0.0981306	0.0446476	0.11203	-0.0663492	-0.003735	-0.00753754	0.0215783	0.00758057	-0.010206	-0.164178	-0.0289273	-0.0209526	0.0708684	-0.0216761	-0.0193055	-0.0503822	-0.0233053	0.0809353
7.2	0.15216	0.0133842	0.177328		0.153205	0.0453009	0.0382415	0.0227621	0.0966262	0.0637099	0.102973	-0.0619965	-0.103308	-0.0139991	0.0312163	0.152153	-0.0339118	0.197936	-0.0019121	-0.0535258	0.0988826	0.017849	-0.0244231	0.0160005	-0.0176504	0.0806541
7.22	0.177199	0.0173817	0.15283		0.149783	0.0278845	0.0137157	0.0189293	0.0747449	0.0580322	0.11284	0.000210162	-0.117432	0.0438222	0.026089	0.235796	-0.0462683	0.0100664	-0.0125992	-0.112662	0.0830685	0.128672	-0.0265191	0.00700298	-0.0874109	0.142589
7.24	0.187594	0.0427035	0.172904		0.179217	0.0959697	-0.00348648	0.0156015	0.0882269	0.0790907	0.138104	0.0194405	-0.0223005	0.000865993	-0.00599478	0.109986	-0.108743	0.16458	-0.0124277	-0.0327181	0.0786279	0.149555	0.00232814	0.0246372	-0.0155079	0.0485155
7.26	0.187818	0.027168	0.166793		0.231061	0.0599067	0.00830647	0.0174185	0.0862319	0.0561204	0.111108	0.0194639	-0.0700988	0.000660234	-0.00655122	0.0875056	0.0127729	-0.0108923	-0.0119259	-0.021542	0.0550408	0.100764	-0.0257001	-0.0163082	-0.0311318	0.10902
7.28	0.163435	0.02907	0.155694		0.234828	0.113778	0.00327156	-0.0131253	0.0871984	0.0254034	0.106882	0.00839036	0.0344913	0.0132189	-0.0369576	0.315677	0.0294877	0.126688	-0.0100173	-0.0157202	0.017968	0.128758	-0.0145521	0.0368717	0.0389702	0.0388599
7.3	0.19041	0.0383019	0.16063		0.195139	0.0374733	0.0224466	-0.0127495	0.120184	0.0908445	0.108613	0.0680291	-0.00866143	0.0185561	0.00343676	-0.138665	0.0699605	-0.0783398	-0.0116492	-0.0106165	0.0539106	0.0132563	0.0101549	0.0255932	-0.0658343	0.108213
7.32	0.167985	0.00121383	0.153419		0.249693	0.147981	0.000383062	-0.0129919	0.111906	0.0871441	0.134306	0.0248778	-0.0581941	0.00357186	0.00305818	0.0596225	0.0179915	-0.10898	-0.0135374	0.0132267	0.0018309	-0.0209474	0.0169565	0.0530193	-0.0216847	0.0833725
7.34	0.177757	0.0122929	0.110958		0.23759	0.0727879	-0.0612284	-0.0168397	0.104385	0.0660283	0.137496	0.0110832	-0.0840262	0.00166629	0.0216542	0.0928312	-0.00816482	0.0594817	-0.0174003	0.0442446	0.12869	0.00604689	-0.0474598	0.0222297	0.018758	0.0889694
7.36	0.195864	0.0599032	0.142522		0.157214	0.0674409	0.0112916	0.0103679	0.0941003	0.0621369	0.109642	-0.00980832	0.0239764	-0.0400121	0.0436736	0.0965972	0.0743086	-0.0708998	0.0196003	0.0448604	0.099268	-0.0427123	-0.0380389	0.0557649	-0.063367	0.112112
7.38	0.220326	0.0452146	0.121656		0.235699	0.157897	0.0162033	-0.00415875	0.089966	0.0585465	0.108465	-0.0259559	0.0484231	-0.0458855	-0.00227913	0.213118	0.029055	-0.108366	-0.0108349	0.0279685	0.0686502	-0.0262749	0.00837285	0.051062	0.078678	0.0493403
7.4	0.24915	0.0369056	0.131996		0.19157	0.110898	-0.00616056	-0.00828705	0.0988101	0.0461719	0.118096	-0.0544176	-0.0366477	0.000820812	0.0556544	0.165649	0.0556895	0.169142	-0.0104367		0.0625226	0.0162566	0.00486805	0.00135436	-0.00472006	0.0924447
7.42	0.167873	0.0346021	0.135425		0.209831	0.00919483	0.00498989	0.0292534	0.109991	0.0305697	0.116188	0.0102589	-0.0456064	0.0161961	-0.0537332	0.219336	-0.0492707	-0.000325634	-0.0175836	0.0569116	0.0576148	0.0271265	-0.0276838	0.0335316	0.0662832	0.062019
7.44	0.130671	0.0152597	0.159257		0.169552	0.0130733	0.00158014	0.0326778	0.0823083	0.0613883	0.116292	0.000604315	0.00829127	0.0348602	-0.000759826	0.0765461	0.0282682	-0.047224	-0.000905133	0.00569906	0.0646624	0.0994827	0.00706967	0.0226754	-0.0316512	0.107428
7.46	0.10751	0.0308644	0.187238		0.241508	0.184141	-0.0111547	-0.0060774	0.0926169	0.0363165	0.108236	-0.0153665	-5.37246e-05	-0.0500481	0.0197281	0.127416	0.0327883	-0.0212087	0.02161	0.00153418	0.0893089	0.0271349	-0.0429209	0.0195061	-0.0527067	0.0829576
7.48	0.21176	-0.00639436	0.169837		0.208192	0.026411	-0.0266675	-0.00470424	0.072848	0.0673145	0.124006	0.0149518	0.0736295	0.0465807	0.0204262	0.114008	-0.0132475	0.0300387	-0.0219689	-0.0473353	0.00187058	0.0477276	-0.0399593	-0.0198215	0.0437527	0.107744
7.5	0.151182	0.00975488	0.180769		0.271514	0.040412	-0.0253446	0.00346608	0.0826809	0.0868642	0.0752769	-0.00186105	-0.0250975	-0.0180905	-0.0122468	0.233409	0.0665718	0.00464911	-0.0566102	0.0193547	-0.0176112	-0.00904214	-0.0231397	0.0564409	-0.000635029	0.106266
7.52	0.160109	0.0607446	0.172647		0.212184	0.0505801	-0.00889767	-0.00992632	0.102881	0.0601918	0.125613	-0.039465	-0.0221209	0.0705123	0.026754	0.146796	-0.0328805	-0.00439601	0.0123	-0.0721007	0.118687	0.0178334	-0.0386547	0.0719443	-0.0376805	0.0742141
7.54	0.211106	-0.0297895	0.179356		0.145666	0.0662891	-0.0117894	0.0337536	0.10093	0.0597361	0.123305	0.0377814	-0.0123789	0.00652425	-0.00425718	0.0366969	0.0750418	0.0018349	-0.0310526	0.058521	0.0762464	-0.0508918	-0.0329874	0.0467795	-0.00302766	0.0792199
7.56	0.185646	0.0216412	0.178132		0.211703	0.0689229	-0.0212687	-0.0138216	0.0971427	0.0436455	0.108031	0.0120113	0.0175356	-0.0314161	-0.00670678	0.0735462	0.0129373	0.219678	-0.0353921	-0.0170983	-0.00653653	-0.0488674	-0.0190857	0.0172049	-0.0105732	0.144187
7.58	0.200066	0.07946	0.154751		0.202503	-0.00581251	0.0146216	-0.00992978	0.0811446	0.0665009	0.112095	0.013132	-0.0600905	-0.00476107	-0.0275245	0.0694203	0.0726925	-0.145028	0.0163813	0.0143873	0.0197123	0.0151012	-0.0524063	0.0923971	0.0227171	0.106187
7.6	0.189546	0.0401895	0.133716		0.19406	-0.027281	-0.0138348	0.00519231	0.102655	0.0309592	0.123681	-0.0464649	-0.0575577	-0.00547701	0.0157613	0.103446	0.0278245	-0.0709164	0.0269235	-0.0104371	0.0312829	0.0591614	-0.0192581	0.0304327	-0.0657596	0.0814466
7.62	0.15605	0.00102272	0.155439		0.230043	0.0542216	-0.0139199	0.020482	0.0878186	0.0636429	0.0946945	0.0102751	-0.040005	-0.0227531	0.0285021	0.0795219	-0.0384126	0.121162	-0.0294545	0.0374946	0.0600991	-0.0283752	0.00680262	0.0244291	-0.0424334	0.110151
7.64	0.197678	0.0544205	0.097738		0.149227	0.0531446	0.0182868	0.00192451	0.12313	0.0476346	0.129054	-0.00514698	0.0802431	0.0134919	0.01487	0.101684	-0.00579148	0.166594	0.0035937	-0.0171361	0.0180761	0.0535506	-0.0270879	0.0501401	-0.0991976	0.129103
7.66	0.215801	0.0391596	0.161941		0.173213	0.0794724	-0.0133766	-0.00211373	0.0896459	0.0570466	0.113669	-0.0230985	-0.0494333	-0.0256296	-0.00255684	0.258784	0.094681	-0.0303878	0.00460111	-0.0850155	0.0954289	0.035588	-0.045274	0.0547205	0.0880751	0.0639446
7.68	0.143938	0.0341769	0.153594		0.157136	0.141228	-0.0263616	0.0093393	0.0990006	0.058654	0.0883236	-0.000621597	-0.00950945	-0.00401215	0.00746831	0.107701	0.0387288	0.129841	0.0134747	0.0217293	0.0953419	-0.00889353	-0.0598488	0.0577025	-0.0268531	0.131247
7.7	0.141762	0.0362799	0.187662		0.201609	0.0669188	-0.0215054	0.00414082	0.107211	0.0362685	0.136928	0.0407674	-7.10669e-05	0.0554596	-0.00219918	-0.0397353	0.0658565	0.0199863	0.0321712	-0.0133865	0.0651485	0.0114423	0.00310481	0.0202948	0.0270585	0.0811699
7.72	0.120602	0.0228214	0.145861		0.156809	0.0960859	-0.0213268	0.0249722	0.104187	0.028101	0.0964164	-0.00611353	0.000250578	-0.0225855	-0.0298642	0.0298054	-0.0194261	-0.0181385	-0.00892521	0.0319147	0.0241919	0.0630598	-0.0167373	0.0276627	5.5909e-05	0.0785037
7.74	0.153594	0.0265857	0.136402		0.156818	0.0926525	-0.0224592	-0.00082084	0.082136	0.0744534	0.12537	0.000103081	0.0382242	0.0204666	-0.0431798	0.0364569	0.0574546	0.0747065	-0.000158624	0.042025	0.0336242	-0.0836813	5.49162e-05	-0.0199347	0.0042675	0.092409
7.76	0.186344	0.0422634	0.144748		0.146013	0.0385142	-0.021393	-0.0215988	0.0986296	0.0515243	0.101269	0.00535118	-0.0378793	-0.0217511	0.0461268	0.0279493	0.0381126	-0.0776798	-0.0152108	-0.0144513	0.0133017	-0.0382844	-0.0254155	0.0262982	-0.0838396	0.127578
7.78	0.150881	0.0462317	0.116477		0.161551	0.095087	0.0158423	0.0214124	0.0974187	0.0536332	0.122122	-0.00409634	0.0351717	0.0140603	-0.0504154	0.0741644	0.0261168	0.0658536	-0.0229467	0.024647	0.0449413	0.0367744	-0.060405	0.0413447	0.0635683	0.107546
7.8	0.181029	0.0488746	0.119181		0.149448	0.0370803	-0.0428246	-0.0175843	0.118509	0.0684651	0.093881	-0.00245585	0.0128597	-0.0118026	-0.0426764	0.121215	0.0320706	0.103278	-0.00366752	0.00173375	0.0332981	-0.0376767	-0.0123086	0.000526368	-0.0479481	0.0816404
7.82	0.170976	0.0138443	0.138165		0.146234	-0.0206441	-0.0211118	0.00799211	0.0901481	0.0464284	0.0943086	0.0266541	-0.0452371	-0.0464148	0.0185352	0.252922	-0.0481812	-0.045634	0.00913622	-0.0382156	0.0403102	-0.0232765	-0.00458085	0.0407297	0.0270238	0.0979397
7.84	0.18806	0.00400029	0.155847		0.244147	-0.0293656	0.0142336	-0.0293831	0.106539	0.0152796	0.13471	-0.0114897	-0.0247726	0.0265398	0.0256305	0.131002	-0.0161562	0.106917	-0.0329445	0.00771967	0.0582538	0.028261	-0.0276539	-0.00284638	-0.0406324	0.0894527
7.86	0.176997	0.05286	0.117019		0.29529	0.0380377	-0.0118786	0.0136945	0.0975009	0.076303	0.115199	0.0450428	0.026038	0.00702775	0.0241611	-0.0385852	0.0476586	0.0696497	0.00861682	0.0198219	-0.0102318	0.0481801	-0.0267429	0.000840464	-0.0488826	0.0810881
7.88	0.136205	0.0902128	0.14955		0.162415	0.146441	-0.020283	-0.017366	0.110176	0.0142788	0.106543	0.00889286	0.0937194	-0.0312029	-0.01732	0.158587	-0.001943	-0.0545094	-0.00590327	-0.0219951	0.138736	0.0222611	-0.0255438	0.0417007	-0.0403803	0.0550078
7.9	0.119651	0.0296243	0.108734		0.21669	-0.0247398	0.0231499	0.0146416	0.11271	0.0421491	0.107289	0.0227754	0.0440761	-0.0184597	0.0310766	0.110608	0.023057	-0.0327926	-0.0412067	0.0202821	-0.0025544	0.0238251	-0.0316304	0.0392168	0.0632263	0.0458152
7.92	0.16068	0.0392181	0.192198		0.195993	-0.0206278	-0.00754819	0.0202115	0.0913996	0.0520048	0.10211	0.000152032	0.0514427	0.0037722	0.0341082	0.0579234	0.0725315	0.108982	-0.00768675	0.0104821	0.0476486	0.0320753	-0.0415566	0.0340556	-0.0282736	0.0826359
7.94	0.137587	0.059086	0.130166		0.249851	0.101274	-0.00553738	0.0172552	0.113793	0.0317896	0.128587	0.0148004	0.0546498	0.00333771	-0.0528695	0.124831	0.0179462	-0.0422736	-0.0650665	-0.0318308	0.0372173	-0.0718759	-0.0544749	0.0520732	-0.0181284	0.151411
7.96	0.196915	0.0146232	0.137954		0.17436	0.12303	-0.00389928	-0.009588	0.100492	0.0202549	0.12075	-0.0573276	-0.0248406	-0.00577219	-0.0171599	-0.0213557	0.0624915	0.164449	0.0302456	0.0514721	0.0864805	-0.00737862	-0.0603247	0.0362806	-0.000649543	0.0910671
7.98	0.223017	0.0581743	0.150512		0.198634	0.0761435	-0.000324871	0.00282117	0.0923147	0.0228935	0.0973621	0.0142316	-0.0416586	-0.0254778	-0.0359754	0.180486	0.0365901	0.0119892	0.0422487	0.00695321	0.0642384	-0.0356217	0.00288653	0.0136258	-0.0358015	0.0445215
8	0.177596	0.0274642	0.15697		0.162798	-0.00256317	0.00206201	-0.0284528	0.0992645	0.0569502	0.0887449	0.0136436	-0.056035	0.00296328	0.0231357	0.0843626	-0.0975643	0.0665185	-0.024463	-0.0034524	0.02545	-0.073339	-0.0156366	0.0463232	0.0472433	0.0726964
8.02	0.203148	0.0410914	0.133501		0.153629	0.0136247	-0.0045414		0.113298	0.0178945	0.134636	-0.0644388	0.0657309	-0.00538297	0.0105738	0.0569043	-0.0155108	-0.0630046	0.0287557	0.00516304	0.0985598	-0.038843	0.00247865	0.0416948	-0.00629337	0.110237
8.04	0.165811	0.00833936	0.150046		0.214702	0.0208064	0.0242717		0.102817	0.0420308	0.0900965	0.0222903	0.0469922	0.0310693	0.00833836	0.0715657	0.0559325	-0.0414961	-0.00988666	0.0109449	0.0457775	-0.0343181	0.00695	-0.0429804	-0.00821646	0.0933276
8.06	0.174076	-0.00976486	0.152993		0.186585	0.125608	-0.00214833	-0.0476957	0.110931	0.0120667	0.131209	-0.0340453	-0.0631806	-0.046943	-0.0341921	0.246423	0.0398085	-0.102113	-0.0318997	0.016439	0.0755896	-0.0434218	-0.0065818	0.0671613	-0.0269636	0.113333
8.08	0.144969	0.0493354	0.17372		0.151932	0.0530855	-0.0367607	-0.0178234	0.101387	0.0603446	0.104435	-0.0276487	0.0541381	-0.0182365	-0.0201664	0.144118	0.00680249	-0.0215704	0.060245	-0.0429279	0.044758	-0.0101212	-0.0111455	0.0287036	0.0586107	0.0759004
8.1	0.15056	3.63342e-05	0.152927		0.136504	0.114193	0.0330278	-0.0126255	0.119853	0.0351083	0.0953554	-0.0256595	-0.0804724	-0.0280714	0.0181047	0.0924432	-0.0124602	0.0913416	-0.012161	0.0484984	0.0654658	0.0435096	0.0269618	0.0712556	0.0584293	0.108471
8.12	0.168403	0.034968	0.188521		0.128121	0.116345	0.0254529	0.0160098	0.116678	0.0348978	0.1108	0.00815376	-0.0680248	0.0228264	0.0455185	-0.0764042	0.0146073	-0.0380876	-0.041081	0.0729926	0.0770947	0.0125966	0.0102395	0.0179283	0.0365936	0.0971425
8.14	0.206914	0.0274782	0.135785		0.300087	0.0197054	-0.00699586	-0.0214097	0.0919117	0.0256416	0.113687	-0.0152856	-0.118469	0.0228431	0.0432219	0.122634	0.03322	-0.0626942	-0.00898194	0.0103995	-0.0160281	-0.0594753	-0.0396742	0.0310783	-0.0220558	0.1326
8.16	0.195955	0.0540631	0.151994		0.194195	0.0294083	-0.0345199	0.00976224	0.109876	-0.00561885	0.0967551	0.0326167	-0.0375363	-0.0233138	-0.0407834	0.180115	0.025808	-0.0344423	-0.000388525	0.0179728	-0.000733191	-0.00504232	-0.060904	0.0129421	0.0420034	0.108742
8.18	0.162418	0.0525306	0.157668		0.222228	-0.0208572	0.0234666	-0.0115092	0.108543	0.0236597	0.105904	0.0199841		-0.00131611	0.0197584	0.0940335		-0.0927608	0.00527479	-0.0320453	0.0411645	-0.0730378	-0.000210392	0.0458044	0.0762274	0.0884336
8.2	0.171022	0.0547369	0.156918		0.141351	0.11203	0.0145684	0.0116217	0.0875119	0.0471523	0.122477	-0.0234734	-0.0641984	0.0438512	0.0372372	0.0595304		-0.0967873	0.0105419	-0.0676398	0.0283658	-0.0736752	0.00351377	0.00333649	-0.00441151	0.0946908
8.22	0.149402	0.0282101	0.126963		0.14635	0.0946001	-0.0200695		0.0953488	0.0512058	0.0763149	-0.0247665	-0.0125585	-0.0277698	-0.0742536	0.0151328	-0.0384813	-0.0412091	-0.0137449	0.00337133	0.12566	-0.0286074	-0.0640745	0.066158	0.0115466	0.0479499
8.24	0.161375	0.0245008	0.116981		0.176793	-0.0107271	-0.0218054	0.016748	0.0765199	0.0300515	0.108873	0.0433182	0.0432705	-0.0121584	0.0151205	0.080151	0.0404124	0.104711	-0.0128073	0.049389	0.063269	-0.113405	-0.0278327	0.0257925	-0.0177545	0.02479
8.26	0.149535	0.0160689	0.132755		0.148307	0.0134016	-0.00839249	0.00361607	0.113414	-0.00365396	0.0914566	0.0445576		0.0107728	-0.0303881	0.0775451	0.0571651	0.160288	0.00590368	0.00668263	0.0767198	-0.0179165	-0.0336855	0.040051	-0.0130208	0.0432994
8.28	0.191021	0.0195268	0.171007		0.12704	-0.013959	0.00665519	0.0130362	0.1007	0.0180032	0.138778	-0.0126212		-0.00653595	-0.0171356	0.0215355	0.0725719	-0.0693497	0.0114286	0.018504	0.0630313	0.00741838	-0.0285105	0.0433999	-0.0432363	0.110858
8.3	0.137042	-0.00367301	0.141429		0.22875	-0.0053114	-0.00293	-0.00189001	0.111798	0.0289779	0.119536	-0.0116288		-0.0198338	-0.0599277	-0.0176396	0.0183767	-0.0361124	0.00529933	-0.0101448	0.0461916	-0.0253065	0.0271756	-0.00270112	0.0561941	0.102384
8.32	0.174153	0.0627487	0.0932381		0.237485	-0.0270342	-0.00204968	-0.0107952	0.0761943	0.0429599	0.0944117	0.00738498		0.0405247	-0.0222402	0.0021509	0.00348238	-0.110138	0.0129768	0.0578299	0.112395	-0.0801896	0.00875603	0.0492187	-0.00769203	0.0465011
8.34	0.128759	0.00485062	0.165353		0.163817	0.0134245	-0.0166484	0.0076549	0.0848668	0.0177279	0.112505	0.0260525		0.0105617	0.0169455	0.0648702	-0.0106942	-0.0475575	-0.00942592	0.0230187	0.0192522	0.0266273	0.0138909	0.0613113	-0.0296446	0.12414
8.36	0.138811	0.0274949	0.176638		0.18049	0.0352875	-0.000114596	-0.019356	0.0780589	0.0447467	0.123137	-0.0352525		0.0090606	-0.0264777	0.144246	-0.0232392	-0.0560302	-0.0144469	-0.0551667	0.147042	-0.0195149	-0.0450572	0.0768105	0.0558247	0.13271
8.38	0.176315	0.0518593	0.201648		0.204421	0.0284558	0.0278653	0.0119612	0.101978	0.0304799	0.0861876	0.0170137		0.0204822	-0.0337316	0.0350752	-0.039354	0.109725	-0.0128054	0.0149266	0.0325642	-0.00834854	-0.0158654	-0.00760237	-0.0125042	0.0685443
8.4	0.132604	0.037972	0.130091		0.223418	0.128999	0.000250298	-0.000623417	0.0766244	0.0330836	0.0895685	0.0190612		0.028585	0.0280491	0.0740695	-0.0504422	-0.0337586	-0.00258403	0.0324067	0.0468791	-0.0536148	-0.0636295	0.0402788	-0.0469344	0.106223
8.42	0.169808	0.0289758	0.114555		0.192703	-0.0105055	-0.0341347	0.00867351	0.0981921	-0.00217965	0.0938549	0.0259231		-0.00668187	-0.00384965	0.0806511	0.000439606	-0.0677145	-0.0329966	0.011559	0.056381	0.0559239	0.0111035	0.00512364	-0.0235009	0.0654224
8.44	0.120952	0.0835673	0.131693		0.175002	0.101737	-0.00723761	-0.0329699	0.0987953	0.011057	0.0880692	-0.00815128		0.00112314	-0.0169912	0.201162	-0.0101802	0.0595983	-0.021404	-0.0402042	0.110031	-0.0370947	-0.0263939	0.0530674	0.0591986	0.0507353
8.46	0.206523	0.0686686	0.139977		0.136861	0.102194	-0.032299	-0.0112273	0.102358	0.00387699	0.100449	0.0732607		0.0360574	-0.0525778	0.0307455	0.0690087	-0.0346429	-0.0190045	0.00263599	0.0841235	-0.0933732	-0.00227517	-0.0373834	0.0633024	0.0701621
8.48	0.176032	0.0420812	0.149979		0.198404	0.0875804	-0.0192572	0.016948	0.100401	0.0249309	0.125507	0.0282788		-0.0307417	0.0749	0.0653786	-0.0408878	-0.0399096	0.0365453	0.0281209	-0.0159283	-0.0416737	-0.0166691	0.0385762	-0.00135289	0.0592314
8.5	0.129204	0.0379132	0.117124		0.182218	0.00290068	-0.0123327	0.000884098	0.113058	0.018453	0.107214	-0.0685433		0.00722654	0.0471331	0.0026149	0.0281729	-0.174633	0.00461143	-0.0356519	0.124816	-0.00387035	0.0318755	-0.0443697	-0.052111	0.035788
8.52	0.191236	-0.0465485	0.130801		0.12611	0.134032	-0.0149376	-0.00841647	0.0932305	0.0569939	0.0957014	0.01972		-0.0353169	-0.0162257	0.0388244	0.0756496	0.104685	-0.0112437	0.0174613	0.0806774	-0.030018	0.0410977	0.0290454	-0.0691449	0.0802123
8.54	0.139221	0.0230874	0.118908		0.156229	0.00630455	-0.0156214	0.0103457	0.076908	0.00988359	0.101083	0.0877465		0.0159319	0.0133785	0.246919	0.0912387	0.0404479	0.00650668	0.0397457	0.114481	-0.0463033	0.0348702	0.0539811	-0.0110361	0.121416
8.56	0.164736	0.0168814	0.126577		0.205613	0.0503895	0.0197846	-0.00578618	0.0932159	0.00784247	0.105703	0.0205686		0.0151034	-0.0287836	0.222543	0.0442964	0.0155503	0.0181769	0.00505522	0.0596193	0.0294311	0.00463755	0.0377192	-0.0472866	0.120455
8.58	0.168128	0.0496826	0.123261		0.195112	0.0497585	0.0057603	0.00670711	0.0966635	0.0424154	0.118822	-0.00361995		-0.0118777	0.0331831	0.0488619	0.0288741	0.129342	0.0213907	-0.0231911	0.0690868	-0.0623931	-0.0249668	0.0368527	0.023924	0.0608911
8.6	0.12726	0.0168771	0.178845		0.306208	0.12622	0.0365344	0.0037271	0.098286	0.0412856	0.08585	-0.0176955		-0.0252135	-0.0266998	-0.00734772	0.0128013	-0.0263744	-0.0304852	0.00999424	0.100921	0.00519753	0.00968542	0.0710148	-0.0431702	0.0693872
8.62	0.186579	0.030755	0.138737		0.171094	-0.0678339	-0.0218625	-0.035668	0.0955141	0.0184081	0.121265	0.0262142		0.0463628	0.00525156	0.127464	0.0247227	0.099531	0.0232083	-0.0235384	0.0608486	0.0529914	0.00156081	0.0582751	-0.0669133	0.0711222
8.64	0.169383	-0.0110923	0.17347		0.184667	-0.0417969	0.00549799	0.00110759	0.08758	0.0209311	0.0772789	0.0076755		-0.0139135	-0.004453	0.114962	-0.0217149	0.0586055	0.068793	-0.000585591	0.060379	-0.0299123	-0.0203083	0.0637616	0.0371221	0.0770133
8.66	0.145253	0.036726	0.148636		0.252926	0.0944659	-0.0289904	-0.00136065	0.10687	0.0203101	0.0865199	-0.0041244		-0.033381	0.0133605	0.0445179	0.058229	-0.0389052	0.00152895	0.0281864	0.0235489	-0.0734277	-0.0631806	0.00340666	0.00661887	0.0446625
8.68	0.180082	0.0482699	0.104353		0.142731	0.104236	-0.0122825	-0.0100586	0.077963	0.0555707	0.102838	-0.0110465		-0.017425	0.00826669	0.0595143	0.0300463	0.103011	0.00569589	-0.0571544	0.0716683	-0.00928032	-0.0372028	-0.0058979	-0.00593825	0.0689725
8.7	0.182991	0.0910537	0.247964		0.245467	0.0604127	-0.0220078	-0.0124056	0.0985918	-0.0170094	0.0851046	0.04532		0.0147548	-0.00983815	0.0462654	-0.00943451	-0.145312	-0.0189377	-0.0147186	0.0437003	-0.154134	-0.00883456	0.0383839	-0.0147268	0.0203681
8.72	0.11614	-0.0354809	0.138333		0.194589	-0.0170356	-0.0401824	0.00100548	0.0914705	0.0147648	0.0897671	0.0053159		-0.0233936	-0.0259146	0.0756946	0.0378074	-0.106244	-0.0385081	0.0173494	0.084893	0.0378388	-0.00574387	-0.0138994	-0.0439128	0.0362768
8.74	0.17916	0.0320635	0.180454		0.209461	0.00449226	0.010955	-0.00758444	0.0834414	0.0462587	0.081553	-0.0773885		0.000621719	0.0245863	0.132379	0.0723839	-0.0273038	-0.0247389	-0.0980397	-0.0336054	0.0452148	-0.0163414	0.0602306	0.0445994	0.0408176
8.76	0.171989	0.0569814	0.162776		0.19794	0.115824	-0.00229075	-0.0294037	0.0729951	0.0233749	0.100735	0.0666044		0.0155055	-0.021741	0.0529169	0.0607894	-0.0158001	-0.0352672	-0.0749966	0.0827178	0.0350063	0.0186175	0.0651135	0.0569555	0.0236424
8.78	0.177232	0.0337871	0.115559		0.226323	0.00497579	-0.00841186	-0.000299641	0.100249	0.0528937	0.113618	0.0310512		0.0195412	0.0199442	0.214578	0.0357076	-0.0582586	0.0057385	0.0104894	0.010946	0.0988482	0.0144957	0.0519279	0.00466638	0.0758866
8.8	0.134145	0.0894038	0.177245		0.187297	0.0526467	0.003738	-0.00746198	0.0740411	0.0327848	0.0891367	0.0355737		-0.0157337	-0.0267032	0.34898	0.0466001	-0.077975	-0.0390964	0.0172712	0.0467267	-0.0236871	0.00567724	-0.00649633	-0.0209644	0.109289
8.82	0.129163	0.0302733	0.128072		0.192022	-0.0440608	-0.0067722	0.00950083	0.10308	0.0328377	0.0797774	-0.0168077		-0.0086052	-0.030749	0.0367733	0.0446435	-0.0578615	-0.0430741	0.034441	0.0243938	0.00223762	-0.00422875	0.0664617	-0.0334071	0.0909018
8.84	0.193205	0.00241717	0.148403		0.235886	-0.0413031	-0.0256023	-0.0117844	0.102348	0.0317948	0.097374	0.000417601		-0.000291001	-0.0132239	0.0647502	0.0621519	-0.0786584	0.0133227	0.0474454	0.0647424	0.0714277	-0.00103043	0.0153462	-0.0204607	0.078971
8.86	0.124514	0.0694863	0.171133		0.158859	0.00979072	0.00232145	-0.0104855	0.0794712	-0.0171806	0.102394	-0.0071949		0.0324527	-0.0352603	0.0930193	0.0342284	0.12598	-0.00489394	-0.0857963	0.0941782	-0.00350222	-0.00367035	0.0527966	-0.0240628	0.132981
8.88	0.123599	0.0566282	0.147315		0.124539	0.182606	-0.0354178	-0.00876391	0.0833028	0.00536301	0.0980194	-0.0535868		0.0143136	0.0278557	-0.0190705	-0.0719633	-0.129306	-0.0246468	0.00727859	0.075621	0.0767957	0.0345193	-0.0103656	-0.0218211	0.0237649
8.9	0.122399	-0.00195315	0.0877422		0.270283	0.0233811	-0.0239315	-0.00711113	0.0842178	0.024854	0.10241	-0.0109488		0.00818866	0.0147631	0.115124	0.0264848	-0.15728	-0.00781389	-0.0118739	0.0338778	0.108747	-0.0378264	-0.027067	-0.0165061	0.110055
8.92	0.128187	0.088823	0.178056		0.188358	0.0337526	-0.00276852	-0.00774685	0.0968776	0.0254699	0.107261	0.0250147		-0.00348326	-0.0590094	0.133384	0.0808768	0.136316	0.0256092	0.0566293	0.0692963	0.0679446	-0.0200425	0.0412483	-0.0797207	0.10939
8.94	0.128041	0.102007	0.169171		0.128456	0.0752044	0.0186016	0.0151394	0.100846	0.00548306	0.110632	-0.0455934		-0.0153082	0.0314997	0.0812033	-0.0233597	-0.207839	0.0295281	0.00526709	0.0290805	-0.0154565	0.00912642	0.0555255	0.063124	0.042813
8.96	0.114442	0.0213719	0.16824		0.219037	0.0568959	0.0166843	-0.0184907	0.0769522	0.00962045	0.112179	0.0486604		-0.0313169	-0.000916683	0.0622066	0.0044406	0.0728294	0.0149909	-0.0116442	0.0107845	-0.031345	-0.0203085	-0.0341846	0.0486749	0.0458765
8.98	0.1536	0.0811669	0.178666		0.187025	0.144491	0.0144443	-0.0293189	0.0838753	0.0355281	0.0853807	0.0628832		0.00801302	-0.0160805	0.0936225	0.0188904	0.0296038	-0.0403512	-0.0900646	0.0515503	0.073381	-0.0251224	0.015725	0.0449052	0.0341283
9	0.150438	-0.0315137	0.160518		0.178009	0.11304	0.0199144		0.0981009	0.00817529	0.0989378	-0.00944594		-0.0216541	0.0263451	0.0252427	0.030322	-0.166211	0.0411488	0.0127824	0.0598274	-0.0355736	0.0102311	0.0232413	-0.027244	0.0529108
9.02	0.122481	-0.00458903	0.142541		0.23842	-0.0619957	-0.0355699		0.0881257	0.00843462	0.0984804	-0.0152492		-0.0696981	-0.0254255	0.0806411	0.050228	-0.0782681	-0.00696016	-0.0241178	0.0154764	0.0283374	0.0051229	0.0205329	-0.0783498	0.0936691
9.04	0.0934515	0.049307	0.152044		0.178547	0.0847021	0.00512529		0.0778906	0.0395783	0.0966154	0.0040144		0.00703606	0.0227194	0.029697	-0.0270405	0.149266	0.00628155	0.00251553	-0.00182413	-0.00889714	0.00475263	-0.0154305	-0.0695791	0.0762889
9.06	0.137807	0.0736891	0.123081		0.186202	0.0890734	-0.00371361		0.0711813	0.0233799	0.0926295	-0.0121682		-0.0487164	-5.60672e-05	-0.105422	0.0286591	-0.06456	-0.0350349	-0.00805738	0.0703765	-0.0271412	0.0102958	-0.0151079	0.0300134	0.105431
9.08	0.132515	-0.023908	0.151062		0.197426	0.0990976	-0.0100284		0.103596	0.0258176	0.0848869	0.0321829		-0.0231561	-0.0380481	0.0969774	-0.0597617	0.177301	0.0076071	-0.0645616	0.0480849	0.0108733	0.0523342	-0.00185906	0.00779759	0.0363581
9.1	0.120112	0.0349685	0.149324		0.169481	0.0374777	-0.00774447		0.0753611	0.0407395	0.10697	-0.0153015		-0.0263062	0.00896434	0.162123	-0.0977606	0.0603426	-0.0195707	-0.0212478	0.00819849	-0.00343735	0.0110114	0.0192621	-0.0505615	0.0858887
9.12	0.175139	0.00624524	0.162751		0.104553	0.0749273	0.00900012		0.0868744	0.0251588	0.111042	0.0136404		-0.00820167	0.0396344	-0.0403366	0.0848722	-0.0868106	0.0389197	0.00338999	0.0988038	-0.0362535	0.0705356	0.0449515	0.0309052	0.0749519
9.14	0.128306	0.0773231	0.16248		0.161579	-0.0669972	0.0109905		0.074883	0.0404519	0.0848817	0.0738128		0.0377259	0.0117492	-0.0333033	0.0185925	-0.127017	-0.0155018	-0.0282656	0.0430372	-0.0537457	0.0176407	-0.0340326	-0.0996088	0.0904303
9.16	0.158518	0.0625998	0.135399		0.161807	0.199465	0.00426057		0.0705945	0.0478357	0.128454	-0.0039561		-0.0138341	-0.0112288	0.164339	-0.00709201	0.00619561	0.0101097	-0.0233107	0.0112144	0.11289	-0.00876899	0.00466475	-0.0652243	0.104517
9.18	0.162274	0.0596311	0.150649		0.130438	0.0360674	-0.0303636		0.0824961	0.00655255	0.107346	-0.0298973		-0.000292457	0.011871	0.0417799	0.0427311	0.162042	-0.0293678	-0.0465884	0.039634	-0.00400713	-0.0038497	-0.00155935	0.0146192	0.0612555
9.2	0.144373	0.04734	0.169606		0.198	0.0526427	0.0198614		0.0696401	0.0364711	0.0841423	-0.0303499		-0.000379721	-0.0541429	0.0453039	-0.00197565	0.0313086	0.0163732	-0.0131984	-0.00954264	-0.0262444	0.00486438	0.0218949	-0.00644593	0.0359745
9.22	0.13449	0.0305552	0.143131		0.273674	0.105683	-0.0212249		0.0608103	0.04008	0.10867	0.0371346		-0.0483253	0.0137603	0.24242	0.099796	-0.0870302	-0.0389313	-0.0291652	0.113189	0.00841817	-0.017699	0.0554928	0.00517292	0.0604601
9.24	0.193776	0.0309803	0.186494		0.235471	0.094447	-0.0164609		0.104314	0.0397858	0.0980911	0.0309765		-0.043475	0.041623	0.0791457	0.0220836	-0.0899652	-0.0142519	-0.022976	0.0309523	0.000740043	-0.0691789	0.0496458	-0.0380387	0.0390765
9.26	0.192234	0.0159515	0.152005		0.18119	0.00148456	-0.0471668		0.0636887	0.0284505	0.0868063	-0.012133		0.00877916	0.0200621	0.00640847	0.0503538	-0.0285425	0.00101637	-0.00427139	0.0342283	-0.0352167	-0.0470687	0.0228721	0.0390891	0.0177301
9.28	0.137388	0.0604913	0.147289		0.157813	0.0807051	-0.0355205		0.0802392	0.0132642	0.0816801	0.0275938		-0.0306996	-0.0398504	0.0363417	-0.0203486	0.109915	0.0232391	-0.0170645	0.0590874	0.0848055	0.0114633	-0.00543355	0.0516364	0.0571071
9.3	0.170851	0.066978	0.126806		0.197225	-0.0711648	-0.00531075		0.077031	0.0152461	0.111237	-0.00320225		-0.0437166	0.0484291	0.0436204	0.00842132	-0.0308665	-0.0150814	-0.0110247	0.129588	0.137003	0.00765765	0.0143264	0.00136153	0.00776888
9.32	0.17386	0.0587954	0.166002		0.166862	0.082781	0.00422748		0.0899326	0.00821879	0.0983742	-0.0225453		0.0239368	0.00335922	-0.0079186	0.019024	0.025843	-0.0258316	-0.0571372	-0.0157816	-0.0300982	-0.00847771	0.0105136	0.0048281	0.0942959
9.34	0.146559	0.0220153	0.14267		0.237911	-0.00932715	-0.00532558		0.119446	0.0281171	0.115744	-0.0456912		-0.0112416	0.00913424	-0.00820496	0.0102112	-0.231604	0.0142985	0.00419883	0.0642159	0.10997	0.00822155	-0.0162268	0.0406509	0.0911937
9.36	0.150613	0.0338292	0.100057		0.173931	-0.0193994	-0.00193361		0.105558	0.0291618	0.0898352	0.00894989		0.00961691	-0.0275727	0.158433	0.00892311	0.0892107	0.00042573	0.0134738	0.0382897	-0.0155874	0.0160245	-0.00398887	0.00713605	0.0487204
9.38	0.158215	0.0398614	0.119224		0.134344	-0.00176998	-0.0135224		0.0923305	0.0219893	0.102538	-0.0166635		0.0315209	0.0558737	0.148381	-0.0751448	0.114701	-0.0291879	0.0117621	0.0694116	-0.0594567	0.00341718	0.0357212	-0.0291385	0.0800972
9.4	0.183462	0.0406798	0.118678		0.125343	0.0932688	0.00719823		0.0869742	0.0389753	0.0885477	-0.0385089		-0.0300387	0.0520199	0.244705	0.0455489	-0.00849388	0.0183637	-0.0135239	0.0822208	-0.010179	0.0205056	0.0347782	0.0381773	0.0649508
9.42	0.107089	0.0247506	0.106124		0.19808	0.0800114	0.0235019		0.0861973	0.0655705	0.124795	0.0107697		0.0100327	-0.0123124	-0.00359428	-0.00346521	0.145054	0.00752461	0.0127904	0.0553345	-0.0172723	0.0151549	0.0477864	0.0732605	0.100295
9.44	0.0940328	0.0288271	0.150808		0.181027	0.123581	0.0148528		0.0954848	0.000374024	0.100725	-0.010475		-0.0331169	0.0549881	0.213975	0.0704029	0.0200582	0.00509339	0.0155283	0.0288452	-0.00248848	-0.0200418	0.0431782	0.018776	0.0130178
9.46	0.142892	0.0194939	0.135627		0.175881	0.0274389	-0.00877757		0.100993	0.0243136	0.082568	-0.0225573		0.00837981	-0.0339555	0.234534	0.0208816	-0.107005	-0.0405772	-0.0632246	0.0354797	-0.112341	0.003004	0.0546273	-0.0367995	0.0955516
9.48	0.151184	0.0230588	0.15471		0.138198	0.0561689	0.0178674		0.0899357	0.0395134	0.0708121	0.0118582		-0.0111295	-0.00797327	0.248137	-0.000453616	0.0105989	-0.00292309	-0.0358335	0.00210568	0.00876152	-0.0594164	0.0360571	-0.0502783	-0.00893782
9.5	0.127458	0.056405	0.185869		0.146497	-0.0209571	0.0168673		0.106981	-0.00511061	0.100589	-0.00404547		-0.0179536	0.0315771	0.251496	-0.0670921	-0.0584467	-0.0112251	-0.000415118	0.0506198	0.00241054	0.0315668	0.00501471	-0.0640246	0.0643412
9.52	0.126891	0.0806608	0.0991834		0.270081	0.194339	-0.00356851		0.0946186	0.0488089	0.0977548	-0.0132054		-0.0188288	-0.0382289	-0.000467067	-0.0143127	-0.0860404	0.0192997	0.0495729	0.0452441	0.0696786	0.0154842	-0.0442663	-0.037107	0.110044
9.54	0.12452	0.0375582	0.118451		0.175544	0.00601867	0.0175112		0.094863	0.0212878	0.0991383	-0.0120658		-0.0506834	-0.022249	0.165295	0.027703	-0.0127643	0.00766515	0.0280973	0.0808753	-0.058208	0.0345794	0.0764957	0.000606997	0.0488335
9.56	0.17457	0.00687733	0.132613		0.210987	-0.0419617	-0.0249541		0.085908	0.0445512	0.0910522	-0.0179273		-0.0018376	0.0135868	0.00144979	0.00918173	-0.126733	0.0746586	0.0419916	0.0407008	-0.000273834	0.025614	0.00111807	0.0111487	0.123182
9.58	0.154234	0.0464351	0.109578		0.171614	0.0350996	0.0163426		0.0849649	0.043945	0.0872397	0.0218966		-0.00269491	-0.0293505	0.037661	0.0158143	0.122702	0.0589634	-0.00398741	0.0443957	0.0219675	0.00295602	0.0869158	-0.0157039	0.115529
9.6	0.174283	0.0346665	0.193188		0.169732	0.0852523	-0.000201963		0.0868841	0.0357709	0.0866951	0.0322257		-0.0425503	-0.00483833	0.10236	-0.0381113	-0.0290454	0.00303142	0.0126541	0.112512	0.0800862	-0.00382293	-0.0279746	-0.04757	0.0577308
9.62	0.13543	0.0258508	0.144513		0.216778	0.0949659	-0.015689		0.0935217	0.0293612	0.103694	0.018329		-0.0111792	0.0260684	0.0832165	0.0251453	0.0122887	-0.0103525	-0.0370472	0.0241334	0.0155768	0.010983	0.0305341	-0.0452404	0.0500366
9.64	0.156551	0.041149	0.111099		0.209346	0.0429565	-0.00208891		0.0901978	0.0266874	0.101681	-0.0128259		-0.0606053	0.0134399	0.0808179	0.0409245	0.0296474	0.023441	0.0384982	-0.00705041	0.0936393	-0.0356253	0.0178963	0.00298631	0.0579578
9.66	0.118364	0.0147289	0.115354		0.176046	0.07634	-0.018218		0.0852279	0.0400935	0.129158	0.00578517		0.0482291	0.0100949	-0.0531607	0.0544632	-0.161153	0.00809567	0.0183219	0.0862234	0.0204495	0.00908518	0.0530446	-0.0650424	0.0496235
9.68	0.124624	0.0518024	0.163712		0.204878	0.116766	-0.0137822		0.101243	0.0597567	0.0997124	-0.00957197		0.0242162	0.0250953	0.11515	-0.0142147	-0.169269	-0.0100242	0.0634618	0.0605914	0.0526194	-0.0077453	0.0333097	0.0221107	-0.0235558
9.7	0.190822	0.0106214	0.128149		0.165301	-0.0551846	-0.0604938		0.0896139	0.0233493	0.0975791	-0.019237		-0.0471729	0.0346564	0.0170039	-0.0015113	-0.110386	-0.00718082	0.0255459	0.0355361	-0.0567024	0.0195262	0.0690046	0.0648018	0.0789757
9.72	0.105979	0.033096	0.155286		0.125842	0.103191	-0.00729476		0.0870032	0.0592305	0.10831	-0.00226474		-0.0429012	-0.0629325	-0.0304978	0.0265854	-0.100169	0.0220426	-0.0116685	0.020391	0.0780113	0.0147677	0.00846137	0.0164238	0.0799949
9.74	0.1551	0.0374111	0.136908		0.135168	-0.00985764	-0.0505136		0.109374	0.0111581	0.0787297	0.00655426		-0.0288665	0.0217273	0.249438	0.043042	-0.0755509	-0.0133605	0.0146175	0.0946852	-0.0138487	0.00294606	0.0323917	0.000408167	0.0612167
9.76	0.138967	0.0183702	0.137728		0.133512	-0.0219048	-0.0194696		0.0897055	0.0334022	0.122989	0.0779165		-0.0423789	0.0166985	-0.00785215	0.0516946	0.248029	-0.00995738	-0.0211046	0.0793961	0.0302401	0.011043	0.078372	-0.0500492	0.0841962
9.78	0.141209	-0.0197413	0.108284		0.188497	0.0176217	-0.0394711		0.077109	0.0538072	0.0765758	-0.00924829		-0.00379834	0.00587446	0.157712	0.0205288	0.111125	-0.0201543	0.0155465	0.0020837	-0.0166092	-0.0181202	0.0588812	0.00261653	0.0697134
9.8	0.14068	0.061824	0.149073		0.192165	0.0879822	-0.00577551		0.090965	0.0409623	0.119161	0.0157218		-0.0435277	-0.0332206	0.0287378	0.00817188	-0.0525783	0.0182606	0.0178575	0.0632976	0.0454179	-0.0248409	-0.00363908	-0.0346183	0.0234822
9.82	0.138397	-0.0285367	0.130365		0.165747	0.0685074	-0.00305623		0.0887558	0.019939	0.0824362	-0.0146522		-0.0291749	0.00672768	-0.0215685	0.0513354	-0.0672489	-0.00473639	-0.0450914	0.00184023	0.124677	0.00393044	0.044954	0.00109809	0.0581095
9.84	0.137194	0.0894659	0.130996		0.205616	0.0250493	-0.0276969		0.0868991	0.0290531	0.0842296	0.00365338		0.0134596	0.00765774	0.145199	-0.0156117	0.124632	-0.0207874	-0.0239857	0.112304	0.0119884	0.0031744	0.0551623	0.000850139	0.0595884
9.86	0.140694	0.0300255	0.103925		0.186172	0.0169844	-0.0467612		0.0773024	0.0299462	0.099019	0.0200776		0.0205563	-0.024004	0.0158146	0.097654	-0.0842842	0.0324984	-0.0310542	0.0018379	0.0465699	-0.0201169	-0.0104698	-0.0192918	0.0401284
9.88	0.0894089	-0.0271893	0.147975		0.105564	0.098891	-0.00734678		0.0723288	0.0515617	0.11977	-0.00580313		0.033791	0.020931	0.0528257	-0.0486263	0.190999	-0.0335516	0.0445848	0.0649032	-0.0215681	-0.0179289	0.050614	-0.073771	0.0170359
9.9	0.121115	0.027265	0.115715		0.172769	0.00882636	-0.0214534		0.0976483	0.0183445	0.105895	0.0373071		0.0364704	-0.0513359	0.155183	-0.0439669	0.128875	-0.0375013	-0.00365129	0.0532669	-0.0208002	0.00135749	0.0322017	-0.0519416	0.02953
9.92	0.0988995	0.0524816	0.144343		0.200951	-0.00282225	-0.0229802		0.066437	0.0261691	0.0660536	-0.00217319		0.027449	0.00056405	-0.00700269	0.061075	0.0425931	-0.0433697	-0.0204883	0.0351348		-0.0486745	0.0648654	0.102066	0.0644742
9.94	0.190179	0.0826279	0.14222		0.136268	0.0162987	-0.00167783		0.078775	0.00740782	0.102206	-0.0200914		-0.040362	-0.00345048	0.0127448	0.107552	-0.00839426	0.000149083	0.00452208	0.0598789		-0.00179342	-0.0171966	0.00350405	0.0469716
9.96	0.117411	0.0399252	0.183371		0.204406	0.081962	-0.0432554		0.0905865	0.0160317	0.0763381	0.00101668		-0.00703581	0.00777999	0.119303	0.0256416	0.110417	-0.0219851		0.0536529		-0.0311256	0.0199188	-0.00671783	0.0546213
9.98	0.113099	0.0490567	0.130761		0.195195	0.0130123	0.0412372		0.106246	0.0157744	0.082003	-0.00901417		0.00469864	-0.0335825	0.00675078	-0.0478661	-0.0225393	-0.0116723		0.00251142		0.0132676	0.0222955	-0.0012138	0.0360642
10	0.145834	0.0183521	0.141661		0.266299	0.0175207	0.00217013		0.0939438	0.0214496	0.0945333	0.00577854		-0.01014	0.0025575	0.0634292	-0.06233	-0.0598948	0.0319112		0.079421		0.027657	-0.000202306	0.0164857	0.0243076
10.02	0.0961228	0.0429084	0.150583		0.186844	0.0846868	-0.00361878		0.0736975	0.028032	0.081518	-0.00111701		0.0368429	-0.007158	0.0215678	0.0270029	-0.0759912	0.0254631		0.00947669		0.00321031	0.0617316	-0.0192338	0.126834
10.04	0.0864733	-0.00424288	0.138993		0.141295	0.0932897	0.00970036		0.0543265	0.0080654	0.0830505	0.0463603		0.0309873	0.0165411	0.0784729	-0.0302061	-0.0543569	-0.0111842		0.0805431		0.0288982	-0.00981369	0.0361033	0.0260028
10.06	0.0798157	0.0605591	0.0795759		0.134005	0.0274021	-0.00397953		0.0966714	0.0340212	0.0656043	0.0452982		-0.00935096	-0.00513948	0.0779188	-0.026497	0.139844	-0.0129559		0.036625		0.0138395	0.0662549	-0.0270633	0.0415009
10.08	0.141616	0.0656097	0.165496		0.184453	0.092857	-0.0190467		0.0894528	0.0127672	0.0799192	-0.0303673		0.00467944	-0.0115119	0.00802649	-0.0058394	-0.142632	-0.00973054		0.0304233		0.0323453	0.020971	-0.0147105	0.0578306
10.1	0.109657	0.0850883	0.135455		0.151034	0.0392713	0.0253993		0.0712745	0.019321	0.0955668	0.0101851		-0.0232938	0.0405433	0.119535	0.0231284	-0.0619671	0.0178816		0.00175953		0.0151368	-0.0190909	0.0487958	0.0479772
10.12	0.154144	0.100973	0.0833436		0.212188	0.0519153	0.00261762		0.0811207	0.0100093	0.0645742	-0.0198862		0.00387673	0.00395024	0.0724264	0.0692708	0.0106095	0.0102971		0.0586893		-0.0266348	-0.00410304	0.0281265	0.0253617
10.14	0.207074	0.0445081	0.153874		0.150438	0.0443997	-0.00678482		0.111224	0.000374594	0.0855374	-0.0457991		0.017346	-0.0086105	0.183016	0.0818217	0.0320993	-0.0220932		0.0501465		0.0159929	0.0121661	0.061296	0.0290809
10.16	0.101719	0.0493935	0.131051		0.19483	-0.040072	0.0199593		0.0901964	0.0282271	0.122238	0.0172756		0.0502097	-0.00693402	-0.134997	0.066928	0.0181888	0.0401617		0.0858736		-0.0393585	-0.00734369	-0.1157	0.061865
10.18	0.0956621	0.0362504	0.11801		0.186862	0.123873	0.00566691		0.0970366	0.0414786	0.0949344	-0.00901396		-0.0461713	-0.0434848	-0.0873223	-0.0550347		-0.0102853		0.017978		0.0251755	0.00305539	0.0370775	0.0049594
10.2	0.139348	0.0352871	0.171223		0.155999	0.075437	0.0184411		0.0944563	0.0303233	0.0822569	-0.0325206		-0.0210177	-0.0390196	0.0520072	-0.0931521		-0.00260183		0.0189867		-0.00688327	0.00527912	0.001995	0.0573056
10.22	0.0545006	0.0549492	0.193279		0.255397	-0.022599	0.0337938		0.100914	0.0511208	0.0927146	0.0651545		-0.0103358	-0.0563193	0.0790705	-0.0808159		-0.00868425		0.0337902		-0.0052052	-0.0105084	0.0295285	0.0691107
10.24	0.158432	0.0828702	0.0958009		0.194771	0.0800876	-0.0203369		0.104675	0.029159	0.0884068	0.0142434		-0.0236272	0.0266959	0.0686393	0.0286293		0.0623501		0.0647811		-0.0464086	0.00261002	-0.0423221	0.0421141
10.26	0.122755	0.0456429	0.178401		0.385251	0.00159139	0.0118193		0.0848562	0.0149506	0.0707135	0.0339602		-0.0256759	-0.0139152	0.0397478	0.0406691		-0.0272821		0.000211949		0.00390936	0.0225337	-0.0446851	0.0445226
10.28	0.051768	0.0606218	0.0989899		0.20805	0.0249344	-0.00675985		0.0812498	0.0213554	0.0794468	0.0260434		-0.00637967	-0.0429902	0.0843936	0.0401271		-0.00587533		0.106509		-0.0175875	-0.0101385	-0.0591547	0.0412459
10.3	0.11099	0.0697745	0.146002		0.189696	0.043715	0.00163307		0.115353	0.00292071	0.0788963	0.104889		0.00160276	0.0236913	-0.023037	0.00238906		-0.0247137		0.0646326		-0.0249957	0.00501708	0.0251875	0.0719199
10.32	0.116326	0.0189439	0.161793		0.22604	0.0952842	0.030392		0.0944994	0.0319972	0.0905618	0.000174345		0.0462788	0.0127928	0.0199918	0.00361854		-0.00666779		0.101513		-0.0323962	-0.0570606	-0.0817799	0.00704752
10.34	0.145613	0.0682551	0.118218		0.202154	0.0303541	0.0116628		0.0951748	0.00442859	0.089427	0.0149725		0.00123731	-0.0455099	0.0684526	0.0175287		-0.00711549		0.0456455		-0.0183543	-0.0107595	-0.0216263	0.0301976
10.36	0.0911785	0.0579079	0.154298		0.198126	-0.0164542	-0.0176625		0.11504	0.0256495	0.0819779	-0.0221796		0.00969713	-0.0359855	0.204323	-0.0128793		-0.0258365		0.071386		-0.010473	0.0259163	0.0321619	0.062346
10.38	0.174082	0.0457528	0.132913		0.138497	0.0416322	-0.00558203		0.11042	0.0192158	0.0751136	0.0153071		0.0575711	-0.0451737	0.0656386	0.0632279		-0.00434952		0.119239		-0.0315725	0.0421275	0.0120786	0.00653725
10.4	0.0979314	0.0373954	0.149698		0.155958	0.163841	-0.00107789		0.104773	0.00688967	0.0949588	0.073869		-0.0174404	0.0170359	-0.0211611	0.0608917		-0.0119311		0.0466604		-0.0203036	-0.0135374	-0.0695634	0.0807157
10.42	0.165217	-0.00400404	0.116669		0.236762	0.00614549	-0.0152104		0.0839151	0.0250033	0.106859	0.0283145		-0.0411678	0.0109894	0.0297	0.0480346		-0.00439128		0.0130062		-0.0218473	0.0013502	0.0634869	0.0186648
10.44	0.134515	0.0023586	0.170599		0.153923	0.0214109	-0.0147896		0.0986606	0.0110263	0.085518	0.0241895		-0.00796542	-0.0272662	0.0851604	-0.0391477		-0.01599		0.133028		-0.0162286	-0.00928907	0.0445967	0.014495
10.46	0.108305	0.0317841	0.11657		0.270313	-0.0144599	-0.0217917		0.100432	0.0122439	0.0865151	-0.00331336		-0.0377506	-0.00491762	0.0457672	0.0435444		-0.0020587		0.0838499		-0.0528767	0.00910198	0.0515329	0.102966
10.48	0.143093	0.0990222	0.14469		0.141032	0.0770239	0.00814894		0.102405	-0.00527593	0.0680372	-0.0163904		0.00128563	0.0478555	0.075231	-0.00128964		0.0438699		0.0301839		0.0266069	0.0337051	-0.0731248	0.0796012
10.5	0.144254	0.00691838	0.0956705		0.182457	0.0998596	-0.0191462		0.0793349	0.0222075	0.108113	0.0894763		-0.0138767	0.0245066	0.0970861	0.0552144		-0.00750714		0.0549014		-0.00432839	0.0338601	0.0317286	0.0426867
10.52	0.073896	0.0080717	0.102493		0.171456	0.0527647	0.0132906		0.0829703	-0.00894226	0.104474	0.0288325		-0.0268136	-0.0475348	0.151515	0.0566846		0.0119566		0.0102327		-0.0620713	0.0414115	0.00503055	0.000902032
10.54	0.0869263	0.0293093	0.152946		0.186018	-0.0604025	0.0224076		0.0827343	0.0404227	0.0923666	-0.0356913		0.0549042	-0.0261767	0.00390353	-0.065766		0.0192252		0.087641		-0.024561	0.0337793	0.0157027	0.0357815
10.56	0.148394	0.0586889	0.161882		0.223144	-0.0564567	-0.00892106		0.0998237	0.0439905	0.0997529	0.00117599		-0.0454153	0.0319025	0.0817734	0.0200354		0.028343		0.0560161		-0.0309066	0.00228449	-0.0556328	0.0690269
10.58	0.127595	0.0473829	0.133646		0.241947	0.0581843	-0.0100016		0.0913612	0.008238	0.075385	0.1134		-0.0290842	0.0473774	0.30747	0.0623348		-0.00951845		0.0565034		-0.00407505	0.0423285	-0.076084	-0.0314481
10.6	0.124801	0.013447	0.111967		0.189233	0.135934	0.0425863		0.0840939	0.0180663	0.0933851	0.0465946		-0.0184598	6.739e-05	0.108374	-0.0206641		-0.0701341		0.0775665		0.000899317	0.0314994	0.0726519	0.0580379
10.62	0.10096	0.0221701	0.157481		0.207663	-0.0204277	-0.0142113		0.0990436	0.0232099	0.084504	0.0161855		0.0157841	-0.0187341	0.282037	0.079916		-0.00189175		0.0436379		0.0275468	0.0319734	-0.0382067	0.0264459
10.64	0.120111	0.04222	0.136049		0.180999	0.0735039	0.00807588		0.102813	0.0189414	0.076832	0.00497216		-0.0239526	-0.0493083	0.0610008	-0.00249194		0.0496227		0.0608179		0.0138487	0.0434368	-0.0175834	0.0612278
10.66	0.106495	0.00656458	0.0355359		0.260576	0.0577914	-0.0496595		0.0966396	0.0448401	0.0831333	0.0428823		0.0196633	-0.0590806	-0.057508	0.00256031		0.0335933		0.00683574		-0.0294222	0.0318201	-0.0375346	0.0586972
10.68	0.0925194	0.0618957	0.143292		0.174262	0.0902793	-0.00110751		0.0778825	0.0632045	0.0850729	-0.0372743		-0.0274175	-0.0365609	-0.0140173	0.0270444		-0.0154142		0.105773		-0.0258317	0.00210525	-0.0149756	0.025665
10.7	0.140872	-0.00207888	0.170298		0.186269	-0.0604777	0.0132837		0.0706884	0.0597067	0.0801612	0.0341741		-0.0204642	0.0163701	0.134994	0.0182664		-0.0265436		0.0551491		-0.0282728	-0.0014244	-0.0233299	0.013127
10.72	0.0479119	0.0394692	0.180196		0.220012	0.134524	-0.00824975		0.0971541	0.0370449	0.097312	0.103413		-0.0433149	-0.0422165	0.0578968	0.0491259		0.0390496		0.0617779		-0.0448088	0.0564897	0.0106301	0.0504858
10.74	0.0919812	0.0219282	0.123071		0.096816	0.0281507	-0.00662918		0.084557	0.0306715	0.0921687	-0.0176185		-0.0160091	-0.0424979	0.133647	0.0371152		-0.0187161		0.0333831		0.0319087	-0.0134699	0.0308875	0.0240565
10.76	0.144993	0.104621	0.147161		0.161007	0.0573501	-0.00811231		0.0805322	0.062737	0.0791327	0.0397569		-0.00475163	-0.00130335	0.126615	0.0524506		0.00956494		0.0411526		-0.0107269	0.01546	0.0310821	0.0113151
10.78	0.119623	0.0624768	0.11318		0.127875	-0.00784038	-0.00851935		0.0818747	0.04875	0.0794511	0.043182		-0.028106	-0.0425616	0.0673331	0.0207568		0.00957524		0.0830248		0.0169873	0.000627734	0.0316515	0.0623678
10.8	0.132431	0.0168302	0.138514		0.133748	0.0317832	-0.0156644		0.0971246	0.0681775	0.0721384	-0.0294655		-0.0274373	-0.0514214	0.0548146	0.0110372		0.0126586		0.0504504		0.00057079	0.0356718	0.0325481	-0.0020035
10.82	0.107883	0.0779033	0.133418		0.192031	0.0211558	0.0166744		0.076037	0.0221116	0.079143	-0.00364286		-0.000673185	0.00955077	0.029378	0.00494782		0.0115628		0.0590605		-0.0159798	0.027514	0.0241116	0.0462503
10.84	0.139465	-0.00692957	0.114691		0.163289	0.0631507	-0.0286908		0.0926202	0.0424352	0.0889679	-0.0123171		-0.0451921	0.0225858	0.0906989	0.0124581		0.000249069		0.101343		0.058614	-0.00353797	0.0277256	0.0477068
10.86	0.0883467	0.0303646	0.0886957		0.182864	-0.0762905	-0.0487819		0.1075	0.0329572	0.0729869	-0.0100162		-0.0226903	-0.021331	0.000887518	-0.0128705		0.0226193		0.0504303		-0.0508991	0.00572477	0.0564424	0.0458232
10.88	0.119299	0.0435274	0.130733		0.155793	0.0902543	-0.0142693		0.0887478	0.0431548	0.0920443	-0.016137		-0.00394585	0.0206472	0.190703	0.0689835		0.0428036		0.0561545		-0.0176794	0.05305	0.0104313	0.0447997
10.9	0.149333	0.0537947	0.114977		0.139478	0.101669	0.0321953		0.0928671	0.0240606	0.0981924	-0.0234191		0.0504364	-0.0486967	-0.0551834	0.0280489		-0.00490307		0.00280261		0.0113217	0.033361	0.0137942	0.0373265
10.92	0.136876	0.0485669	0.100865		0.154974	-0.0132553	0.0190567		0.0788665	0.0173565	0.0854605	-0.0198447		0.012394	0.00845051	0.130551	0.07263		0.0208217		0.145905		-0.0200811	-0.0246363	0.0773863	0.0454287
10.94	0.142724	0.0614255	0.114274		0.138277	-0.0309109	-0.0117735		0.097363	0.0331637	0.0861739	-0.00475285		0.00565642	0.0334522	-0.0375511	-0.0448753		-0.0249257		0.0252644		0.00131763	0.0430343	-0.0533421	-0.00203101
10.96	0.0901663	0.0540542	0.144822		0.210358	0.100654	-0.00323098		0.084037	0.0371532	0.109338	0.0204048		-0.0136284	-0.0599943	0.0291979	0.0585326		-0.0250612		-0.0138856		-0.00918283	0.0377601	0.00589006	0.0341211
10.98	0.111528	0.0202889	0.0827195		0.202021	0.0800772	-0.0435123		0.0796752	0.0243766	0.0926395	0.0353985		0.00203319	0.0169383	0.0424006	-0.0768423		-0.0267445		-0.011257		0.0155328	-0.0217719	-0.0622044	0.0229927
11	0.146376	0.00557265	0.129174		0.203099	-0.0314249	-0.0144068		0.0970927	0.0535818	0.0657182	0.00530293		0.0133593	0.00398836	0.131112	0.0853959		0.0907245		0.00775321		-0.050189	-0.00438598	-0.0585294	0.0560327
11.02	0.110985	0.0244484	0.131813		0.189952	-0.00619892	-0.0120457		0.0620046	0.0220659	0.094667	0.00419889		-0.0198757	-0.0304534	0.0085951	0.0140748		0.0274564		0.078152		0.0394794	0.0478035	-0.0102012	0.115663
11.04	0.111065	0.0279918	0.137692		0.168247	0.0734601	0.00748122		0.0865422	0.0664514	0.0927542	-0.0247163		-0.0107772	-0.0273738	-0.0663757	0.0316787		-0.0165819		0.0380686		0.0144838	0.0325275	0.0326958	0.0300819
11.06	0.14412	0.0312259	0.128798		0.165107	0.0643036	-0.0109821		0.0914342	0.0334367	0.0998065	0.0237271		-0.0178637	-0.023302	-0.0162971	0.0167551		0.00145118		0.0196273		-0.0427565	0.0204944	0.0426574	0.0242551
11.08	0.0867979	0.0209217	0.137321		0.140576	0.0716597	0.00162532		0.0786838	0.0333902	0.0781318	0.00885597		-0.0318958	-0.0539826	0.0294346	0.0486264		-0.030559		0.127727		0.0348833	0.00426274	-0.0669153	0.10057
11.1	0.0971814	0.0535562	0.118812		0.180913	0.0208398	0.0541788		0.107688	0.0715928	0.106582	0.0516661		-0.00893902	-0.0127164	0.173801	-0.0145936		-0.010776		0.0357346		0.0148735	0.0521283	0.0558539	0.07967
11.12	0.0753723	0.0645028	0.122897		0.197145	-0.00637918	0.0514285		0.0914994	0.0340076	0.0982141	0.0392145		-0.0026449	-0.0425174	0.0549884	-0.0126744		0.0115477		-0.010486		0.0574335	0.0140234	0.0442362	0.0465315
11.14	0.101393	0.0318673	0.114435		0.154666	-0.00430826	-0.0246224		0.0812142	0.0381424	0.0752152	0.0405384		0.00728695	-0.0320781	-0.0673671	0.0843171		-0.0047529		0.0262381		0.0127856	0.0142275	0.0307409	0.0715396
11.16	0.101309	0.0563383	0.11994		0.205217	0.108498	0.00596028		0.105857	0.0658943	0.0826367	0.0682004		0.0289432	0.0230869	0.0319983	0.0155819		0.00641393		0.0433989		-0.0061042	0.049007	-0.0104544	0.0519328
11.18	0.150939	0.040712	0.104552		0.116802	-0.0680959	0.0543654		0.0815731	0.0207744	0.0740518	0.00336081		-0.018417	0.0410695	0.130783	-0.0175774		0.0130714		0.0424392		-0.00230298	0.0153932	-0.0324265	0.0573768
11.2	0.0787335	-0.00131175	0.140052		0.171994	-0.0910976	0.0402192		0.0744307	0.0239932	0.0763189	-0.00791502		0.01884	0.0114753	0.188244	0.0685052		0.00248575		0.0580432		-0.026772	0.037461	0.026691	0.0502244
11.22	0.10979	0.055434	0.112739		0.191768	0.0591876	0.00109894		0.0899716	0.0235561	0.114724	-0.0533757		-0.027849	-0.0210334	0.0936904	-0.0820713		0.016827		0.0313688		0.00545075	0.0431284	0.00771624	0.0225968
11.24	0.103057	0.0194735	0.153367		0.171318	0.135863	-0.00138539		0.0849049	0.0530842	0.0837078	-0.0190873		-0.0244432	-0.051759	-0.0249357	0.0611508		-0.0276266		0.0895102		0.0341811	-0.00746716	-0.131372	0.0722821
11.26	0.0930937	0.0328539	0.177216		0.123824	0.0217934	-0.00199578		0.0695903	0.050524	0.0648739	-0.00488696		0.0410112	-0.00554578	0.00652955	0.037957		0.035353		-0.012235		0.0338151	0.0517003	-0.0561715	0.0189468
11.28	0.101862	0.0414482	0.126585		0.187618	0.062023	-0.00423852		0.0534296	0.0238493	0.074356	-0.0342682		0.0113411	-0.0173127	0.128766	0.0503879		0.00798134		-0.00296463		0.00432828	0.0540052	0.0197924	0.0458678
11.3	0.108918	0.0350703	0.0870596		0.128589	0.0905264	-0.0162877		0.0840297	0.0501507	0.0854772	-0.0175863		-0.0143223	-0.0287375	-0.0114879	0.042015		-0.0345758		0.0439635		-0.0739985	0.0465838	0.00254996	0.0398761
11.32	0.0617212	0.0593655	0.112805		0.185079	-0.0457507	0.0150662		0.0968143	0.0410987	0.0632135	-0.0105292		-0.00905631	0.0283992	0.0434746	0.0030073		-0.00323354		0.00789914		-0.00785906	0.052625	-0.0373067	0.00193808
11.34	0.0986975	0.0481447	0.0940884		0.107277	-0.0294374	-0.0426906		0.0779764	0.0297409	0.0988274	-0.0480177		-0.0243837	0.00893884	-0.0304435	-0.000492734		0.00384111		0.0572087		-0.0112768	0.0132432	-0.0556011	0.000832958
11.36	0.0918788	0.0463435	0.147607		0.131833	0.067257	-0.00635394		0.0930155	0.0379605	0.0746621	-0.0131895		-0.0028944	-0.0393659	0.134139	0.0727413		-0.00629532		0.016771		0.0331867	0.0616027	0.0609427	0.0313338
11.38	0.112153	-0.00121241	0.175336		0.141896	-0.0189932	0.016532		0.0860858	0.0245946	0.0732541	-0.0257493		-0.0412693	-0.0287268	0.212723	-0.00601553		-0.00431742		0.0789244		-0.0160755	0.0217722	-0.0648859	0.0236599
11.4	0.100207	0.0526466	0.0849384		0.0938355	0.03682	-0.0359441		0.0860783	-0.0173264	0.0688319	-0.000416454		-0.0206027	-0.0389368	0.0308491	-0.0361842		-0.0037092		0.0442646		-0.0132104	0.0809399	-0.0020912	0.0275305
11.42	0.0853142	0.0468486	0.118406		0.125066	-0.0481447	-0.0174938		0.100729	0.0252668	0.0708744	0.0246765		0.0231274	0.00356467	0.0530162	0.0128144		-0.0151672		0.0175927		0.0535792	0.0270154	-0.0305096	0.0155508
11.44	0.0841426	0.0363274	0.0575813		0.159601	0.0640472	0.00420108		0.0695258	0.0158074	0.0812311	-0.0168059		-0.03146	0.00823436	0.128731	0.0448605		-0.00608571		0.0181714		-0.0301043	0.0910873	-0.00393377	0.0579561
11.46	0.12056	0.0943784	0.11286		0.0728627	-0.0329538	-0.0207274		0.0769976	0.0174264	0.0881303	0.0347924		-0.0409352	0.0283731	0.031544	0.0292914		-0.0214544		0.0891433		-0.0360101	0.0612316	0.0292205	-0.0145602
11.48	0.0920109	0.038857	0.126128		0.201774	-0.0394111	0.0117031		0.0928757	0.024956	0.0837639	0.0175778		-0.0178778	-0.0376195	0.173684	0.0281772		-0.0108049		0.00781613		-0.0317708	-0.00570902	0.0104556	0.0333316
11.5	0.0998865	0.062575	0.0853866		0.122717	0.0316025	-0.0125993		0.0775706	0.0276801	0.0840103	0.0607005		-0.00829092	0.00396561	0.0169644	-0.0273388		-0.00330066		-0.0130423		-0.00392228	0.048167	-0.0402846	0.011892
11.52	0.0924466	0.0338607	0.147291		0.233724	0.0300907	-0.000508616		0.0940249	0.031937	0.072011	0.0480519		0.0507113	-0.0412368	0.241287	0.0382215		0.00933883		0.0963721		0.00547799	0.00674282	0.0294908	0.090326
11.54	0.0942809	0.0563886	0.118332		0.231919	0.0707265	-0.00818074		0.0816873	0.0563697	0.0682133	0.00273861		-0.023079	0.027334	0.27676	-0.0311429		-0.0133746		0.0904809		-0.0230706	0.0273687	-0.0368195	0.05923
11.56	0.0713522	0.0192847	0.136651		0.185735	0.0409879	0.0390405		0.0725104	0.0218328	0.0781731	0.00536373		0.000460761	0.00653082	0.0501704	0.0247556		-0.0223837		0.119207		0.00810395	0.0345515	-0.00442558	0.0360671
11.58	0.106782	0.0521513	0.12067		0.192011	0.0079114	-0.0500888		0.0824939	-0.00552628	0.0852897	0.0116808		-0.00325571	-0.0266513	-0.0177801	0.0161572		-0.0159315		0.0560662		-0.0373258	0.0277106	0.0356581	0.0389058
11.6	0.0961902	0.0484368	0.0836391		0.159351	0.110107	0.00598103		0.0811979	0.0312721	0.0643041	-0.0224292		-0.0106737	-0.00785024	0.0151441	0.0416747		-0.0287992		-0.000344732		0.00103804	0.0277975	0.0125716	0.0182606
11.62	0.105453	0.0639173	0.0972391		0.117082	0.0683443	-0.0443947		0.0800848	0.0235299	0.103258	-0.0224687		0.00403148	-0.0312994	0.0903679	0.0415028		0.018563		0.0786623		-0.0349254	0.00265596	0.0429292	0.050182
11.64	0.0550007	0.0303059	0.131779		0.148673	0.0903149	-0.0369687		0.0824953	0.0139003	0.0750296	0.00731527		0.00804573	0.00945258	0.111858	0.00502654		0.0229323		0.0665614		0.0175774	0.0370282	0.0272165	0.0106776
11.66	0.097203	0.0465319	0.153921		0.158005	0.0195664	-0.0233535		0.0856258	0.0145971	0.0944684	0.041914		0.0105755	0.0410965	-0.0371978	-0.0241057		0.00595847		0.0253493		-0.016844	-0.0647238	0.0524046	-0.0291903
11.68	0.0792334	0.053371	0.136549		0.0984551	-0.0218777	0.0245056		0.0905527	0.0170727	0.0662156	0.0538207		-0.0289379	0.00235147	-0.00469554	0.0020134		0.0458215		0.0977032		0.0278271	0.0164002	0.0389532	0.0113906
11.7	0.0681682	0.0529152	0.119329		0.237038	0.0733471	0.00422916		0.0791153	0.015078		-0.0070597		-0.00784159	-0.0554986	-0.00699327	0.0207386		0.0352699		0.0725394		-0.0143195	0.0288299	-0.0631443	0.0772575
11.72	0.0481886	0.09603	0.103894		0.122657	-0.0565254	-0.0285991		0.0724057	-0.0187473	0.0984986	-0.0107131		-0.0594909	0.0273486	0.0463682	0.0299779		0.0175683		0.0508729		-0.00898246	0.0425298	0.0199393	0.0415749
11.74	0.109655	0.0318604	0.101855		0.185664	0.181378	-0.00271285		0.0853862	0.0341363	0.0524607	-0.027147		-0.0404234	-0.0476862	0.138516	0.0438485		-0.0464131		0.0628447		-0.0289585	0.0165089	0.0180967	0.0332757
11.76	0.121246	0.036443	0.166064		0.248889	-0.0516125	0.0567257		0.062494	0.0416674	0.0742401	0.0630398		-0.00094733	-0.0363242	0.0239265	0.0775441		-0.00247769		0.0476733		0.0184849	0.0228651	0.0390105	-0.0229259
11.78	0.08558	0.057348	0.0793708		0.162803	0.00936694	-0.019507		0.0603378	0.00570524	0.0804712	0.00289812		-0.023645	-0.0229129	0.0212741	0.0201153		-0.0323259		0.0649094		0.00933565	0.0132355	0.0598072	0.0297887
11.8	0.098422	0.049651	0.0617098		0.146173	0.0673211	-0.0122202		0.0968288	0.0140116	0.0522107	-0.0206781		0.0279996	-0.0688476	0.143101	-0.0265189		-0.0257701		0.0180623		-0.0318837	0.0290934	-0.0718459	0.0758364
11.82	0.0820237	0.0185304	0.102468		0.196025	0.0804469	0.0220947		0.0828596	-0.00577978	0.071379	0.114216		0.0531147	-0.0397022	0.114376	0.0439186		0.0103566		0.0254715		-0.0243292	0.0590559	-0.0229983	0.0466637
11.84	0.0959167	0.0444052	0.100674		0.195321	-0.0680215	-0.0187859		0.0692681	0.00943567	0.0628474	0.0131533		-0.0109683	0.0193123	0.122822	-0.012708		-0.00987771		0.074343		0.0637747	0.0621443	-0.00714703	0.021176
11.86	0.0706372	0.056748	0.120541		0.201914	0.0527387	0.0209526		0.0820519	0.0511567	0.097913	0.0209105		0.00981593	-0.0539716	-0.0406411	0.00377523		0.00372694		0.0734126		-0.0304718	0.0364169	0.061978	0.037584
11.88	0.0999873	0.0255265	0.0812655		0.182248	0.126095	0.00875605		0.0913351	-0.00453198	0.0743929	0.0329668		0.0307004	0.00648646	0.0667235	0.0126968		0.0133889		0.103174		0.000326843	0.0198373	-0.0352312	0.0337203
11.9	0.0888268	0.0366962	0.151147		0.231906	-0.0245051	-0.00193132		0.0899519	-0.0206787	0.0700566	0.0265764		0.00858444	0.00630063	0.0552907	0.00246759		-0.0224837		-0.0369894		-0.00172373	0.0483364	0.034209	-0.0173551
11.92	0.143091	0.0792573	0.121407		0.298721	-0.0441408	0.00421629		0.0648559	0.0235071	0.0720502	-0.00778136		0.00399081	-0.0272438	0.133223	0.0168305		8.56401e-05		0.100655		0.00770129	-0.0191645	0.0397371	0.0211422
11.94	0.123433	0.0196647	0.167592		0.215853	0.0253416	0.00713815		0.101822	-0.014421	0.0674395	0.0449608		0.00922182	-0.0494219	0.0233807	-0.0323902		-0.0413777		0.0275426		-0.0415594	0.0608391	0.0327374	0.0810511
11.96	0.0520116	0.0495044	0.106014		0.163426	-0.00304674	0.0455047		0.0913165	-0.0051192	0.0858223	-0.0212843		0.05803	0.00558721	0.156353	-0.0183022		-0.0182815		0.0557895		0.00194315	0.0146279	0.0428873	0.028227
11.98	0.118124	0.0566489	0.0909169		0.165148	0.0390597	0.0216858		0.0858165	0.0100356	0.0719012	0.0420059		0.0497574	-0.0339946	0.194255	0.0716798		-0.00414442		-0.0208466		-0.026608	0.0195243	0.0261788	0.00524448
12	0.116475	0.0613865	0.128597		0.175583	-0.107962	0.0144007		0.0720086	0.0403081	0.0802242	0.0416194		0.000676145	-0.0518212	0.0753186	0.0357372		-0.00812072		0.0819802		0.0190372	0.00470239	-0.0509481	-0.0561426
12.02	0.122899	0.0282989	0.115692		0.22984	0.0750817	-0.0363922		0.0968185	0.01164	0.0595486	-0.00491688		-0.0382151	0.0801753	0.053856	0.0141182		0.0136055		-0.0629061		0.015442	0.0415685	0.0257151	0.0767366
12.04	0.103832	0.0440611	0.124482		0.155494	0.0104592	9.21596e-05		0.0828669	0.0146652	0.076934	-0.0116397		-0.00217497	-0.04312	0.0242865	0.0877042		-0.00721823		0.0557733		-0.0594565	0.0552124	-0.00541582	-0.000124853
12.06	0.118466	0.0524585	0.124567		0.181448	0.0846676	0.0246941		0.0893466	0.0072735	0.0665308	-0.0362982		-0.00355229	-0.0349786	0.0439871	-0.0114171		-0.0161299		0.0623305		-0.0120676	0.0488951	0.00350053	0.0247969
12.08	0.0930806	0.0439966	0.111699		0.110285	0.102047	0.0364854		0.0788092	0.0263868	0.0813366	0.00192703		-0.0122429	0.0173886	0.0691868	0.0410915		-0.0487468		0.0379353		-0.0238052	0.0149907	-0.0104065	0.0305472
12.1	0.0763513	0.0302425	0.112391		0.103703	0.00335539	0.0160704		0.0817578	0.0226082	0.0947593	-0.00062619		-0.00638914	-0.00124774	0.0289841	0.0461905		-0.0179173		0.00799038		0.0060309	0.0265427	-0.0689103	-0.021639
12.12	0.0911164	0.0535319	0.105051		0.131404	0.0775337	-0.00223623		0.0777376	-0.0113629	0.102849	0.00110394		-0.0254845	-0.0336525	0.149082	0.00726492		-0.0263553		0.0722089		-0.0173198	-0.0102288	-0.0399788	0.0533649
12.14	0.100997	0.0286753	0.117779		0.137803	-0.0139511	-0.0205948		0.0920782	0.0164035	0.0827007	-0.0106325		0.0102158	0.00382653	0.235282	0.1261		-0.0268478		0.0960761		0.0209275	-0.00331496	0.0594919	0.0454438
12.16	0.104053	0.0701212	0.115052		0.21011	-0.075251	-0.00815256		0.0730808	0.0123329	0.0426572	-0.00362587		-0.00282124	-0.0402437	0.22484	0.0323761		-0.000341289		0.087051		0.0299992	0.0290209	0.00907629	0.0044826
12.18	0.074003	0.0268308	0.103186		0.130167	-0.018732	0.00395222		0.0903101	-0.0147535	0.0730937	-0.00317806		-0.00624328	-0.0281191	0.0691647	0.0573485		-0.0175543		0.0978162		0.0391567	0.0743542	0.0543728	0.0256267
12.2	0.111118	0.0333572	0.103506		0.228203	0.00720726	0.0120643		0.0970884	0.0150227	0.0727514	0.0286199		-0.0247063	-0.0259847	0.0258952	-0.0521884		0.00785005		0.120415		0.0027746	0.0212942	0.016636	-0.0269537
12.22	0.126085	0.0183233	0.0734313		0.194228	0.127597	0.0214989		0.0755113	0.00179877	0.087226	0.0126122		-0.0281039	0.00488285	0.258462	0.0417168		-0.0328622		-0.0280668		-0.00586286	0.00674887	-0.039071	0.0325694
12.24	0.140835	0.0511923	0.105168		0.251737	0.0707173	-0.0194623		0.090388	0.00306518	0.043438	-0.0279591		0.0270386	0.00337904	0.0526719	0.062346		0.0214676		0.0174703		-0.0408823	0.0229714	-0.058977	-0.00398334
12.26	0.12487	0.0941872	0.141559		0.205049	0.00114181	0.0114739		0.0693705	0.0216691	0.0733093	-0.0228221		0.0118353	0.000329941	0.0933244	0.0617663		-0.00727862		0.0991694		0.0311478	-0.015282	0.00196056	0.0373077
12.28	0.111489	0.0484842	0.0957235		0.196971	0.0718364	-0.0205692		0.0747383	0.0102089	0.0743258	0.0335295		0.0258041	-0.00257632	0.0864393	0.0505631		0.0162757		0.112182		0.0169	0.0114439	0.0103909	0.0260969
12.3	0.0975669	0.0406247	0.0617331		0.173936	0.12708	0.00860347		0.0852885	0.0302214	0.0433676	0.00210651		-0.0237853	-0.0238055	0.0770747	-0.0115838		-0.0201455		0.0339444		-0.0356925	0.0849724	0.129023	-0.00240674
12.32	0.0526062	0.0444763	0.113009		0.147686	0.0635386	-0.00240598		0.0907418	0.0131693	0.106078	0.0211128		0.00725753	-0.00137997	0.284087	-0.0179236		-0.00409753		0.0315134		0.0291364	0.0557799	-0.000867346	0.0700943
12.34	0.114909	0.0844805	0.130209		0.119741	-0.0581288	-0.0493178		0.0582406	-0.00928107	0.047281	-0.0319245		-0.0184686	-0.0319202	0.174148	0.00187868		-0.0146954		0.0931074		0.0210737	0.0369065	-0.0339245	0.0131996
12.36	0.0916899	0.029383	0.11444		0.142495	0.0950727	0.0348635		0.0691713	0.028111	0.0691195	-0.00718484		-0.0557061	-0.0180566	0.143626	0.0340882		0.0184792		0.0212906		0.0405371	0.0224148	-0.0361857	-0.0255371
12.38	0.11837	0.0281144	0.129033		0.185164	-0.0545324	-0.0180442		0.0732153	0.042667	0.0812592	-0.00673319		-0.0376938	0.0176089	0.0608233	0.0775768		0.0200949		0.0412627		-0.0173688	0.0452254	0.0671071	0.00694871
12.4	0.0489991	0.0348303	0.128082		0.207372	0.0477815	0.039171		0.088968	0.0385504	0.0638169	-0.0316023		-0.0468172	-0.038131	0.0151948	-0.0345657		-0.0393316		-0.00822225		-0.00428296	-0.0176131	-0.0632803	0.0586913
12.42	0.0747951	0.0327308	0.123302		0.131091	0.00627482	0.0357359		0.0658202	0.0177836	0.0696507	0.0332134		-0.0217339	0.014828	-0.020924	-0.0284204		0.00450152		-0.0186613		-0.0698078	0.0353988	-0.0609274	-0.00243573
12.44	0.0992927	-0.00719823	0.120365		0.101766	0.121112	-0.0228738		0.0826254	0.0437889	0.0709068	0.00416576		0.0280235	-0.014118	0.0172456	0.0540458		0.0191484		0.0615924		-0.0287963	0.0544861	0.00424146	0.0238116
12.46	0.0731955	0.0125473	0.0989273		0.100678	-0.0568262	0.0620909		0.0813054	0.051549	0.0873027	-0.00969615		0.0431668	0.00932884	-0.0245474	0.0214158		0.0021621		-0.0242827		0.0141292	-0.00651369	-0.0722741	-0.00210315
12.48	0.0914453	0.0568999	0.0964932		0.185544	-0.0142178	-0.01096		0.0783168	0.0170481	0.0511221	-0.0213547		0.0271269	0.00668746	0.00209516	0.0811677		-0.00371958		0.0392526		-0.0536381	0.0512785	-0.0480263	0.0384153
12.5	0.0841648	0.0399088	0.108854		0.189631	0.03495	0.0272242		0.0901579	0.0819357	0.0775119	-0.0358724		-0.0200022	0.00518221	0.00158523	0.0274648		0.0084358		0.0803041		-0.0353165	-0.0224836	0.0136039	0.012834
12.52	0.0854741	0.09087	0.118072		0.0832749	0.0217434	-0.0305904		0.0638202	0.0242596	0.0817613	0.0558076		-0.0154551	-0.0532308	0.216097	0.0412409		0.0324249		0.0608646		0.0231209	0.0326628	-0.0290646	0.0477475
12.54	0.120623	0.0480399	0.108549		0.0590771	0.066353	-0.00528647		0.0838825	0.0601773	0.0528529	-0.0251869		0.000663351	0.00350995	0.0951045	0.0952788		0.00979703		0.0299444		0.0299027	0.00150293	-0.0737921	-0.00580165
12.56	0.105245	-0.0158775	0.151638		0.137692	0.053961	0.0091801		0.0848555	0.00573231	0.0413191	-0.0123923		-0.0272912	0.0544895	0.0718419	0.0248378		-0.0272248		0.00892393		-0.0393759	0.0227308	-0.0148726	-0.0129568
12.58	0.015243	0.0581026	0.101073		0.218824	0.0700334	0.0122249		0.0711277	0.00608001	0.0737324	-0.00170074		-0.0279425	0.0123546	-0.0753889	0.0143517		0.0253682		0.0104265		0.00322617	0.025638	0.0102458	0.0442006
12.6	0.0957157	0.0280793	0.124749		0.262034	0.104587	0.0123867		0.076103	0.0197067	0.0753075	0.00552738		-0.0109167	-0.016102	0.076404	0.0284634		-0.00944845		0.0411452		0.00354531	0.0383267	0.0314855	-0.0260741
12.62	0.0596316	0.123974	0.0823193		0.223983	0.0420866	-0.0287776		0.112289	0.0309807	0.0723702	0.0811646		-0.00773183	0.00954968	-0.141968	-0.0174592		-0.0239204		0.0744748		-0.0500596	0.0176442	-0.036581	-0.00490806
12.64	0.0661076	-0.00387046	0.116592		0.201521	0.037562	0.0103415		0.0937745	0.0516594	0.0765011	-0.0154262		0.00337203	0.00281144	0.249402	0.0576613		-2.1822e-05		0.0102865		0.0213364	-0.00169919	0.106869	0.0730626
12.66	0.095852	0.0325654	0.106738		0.161194	-0.02702	0.0208202		0.0829705	0.0311548	0.0768937	-0.0134211		-0.0174486	-0.0210942	0.0990331	0.00962507		0.0270402		0.0788796		0.0667107	-0.0325801	-0.0839019	-0.0180796
12.68	0.0743745	-0.00881343	0.0898692		0.191924	-0.0233161	0.0125685		0.0753708	-0.00881529	0.0493462	0.0322585		-0.0368678	0.0431454	0.0481047	-0.0623333		-0.00966513		0.0150373		-0.026263	0.0139842	0.0148602	0.0109435
12.7	0.0901342	0.0624604	0.139055		0.152674	-0.0230637	0.00874677		0.0661016	0.00851331	0.073226	0.0201189		-0.0234086	-0.0584141	-0.00654782	0.0375523		-0.0238953		0.0501147		-0.0362783	0.0283154	-0.0569474	0.00217316
12.72	0.0635217	0.037479	0.0990896		0.143004	0.048558	-0.00222916		0.0610409	0.00884779	0.0778623	-0.0132957		0.0296899	-0.0154128	0.144653	0.043288		6.21014e-05		-0.0320727		-0.0214673	-0.0342832	-0.0376154	0.0167455
12.74	0.103784	0.110285	0.0778217		0.174155	0.074589	0.0626312		0.0796292	0.029848	0.0731974	0.0416924		-0.00667828	0.00546978	0.16081	0.0151023		-0.0177137		0.0900061		0.00845372	0.0333527	0.0376188	0.0605266
12.76	0.102943	0.0454037	0.109961		0.14394	0.0443892	-0.00764504		0.0757292	-0.0224159	0.0628737	-0.0118563		-0.00303481	-0.0259655	0.0140373	-0.00228859		0.0290748		0.0284712		-0.0559245	-0.0133181	0.10083	-0.0395939
12.78	0.105508	0.0407095	0.105873		0.225317	0.0161667	0.0589879		0.107055	0.0420348	0.0568598	-0.0106707		-0.0647708	-0.0114886	0.0999902	0.00680909		0.0234043		-0.0101815		0.0135949	0.0466169	0.139283	-0.00702732
12.8	0.139847	0.0683202	0.113548		0.193892	0.144711	0.054811		0.0925208	0.0139941	0.0745933	-0.0121341		-0.0501383	-0.00756714	0.0549801	-0.0056824		0.012954		0.065629		0.0558548	0.0083786	0.000473194	0.0140826
12.82	0.0673943	0.0183945	0.113482		0.133327	0.0108788	0.0323556		0.0514432	-0.0167363	0.0609473	-0.0217274		-0.076063	-0.0391837	-0.0428632	-0.0769746		-0.0270086		-0.00462312		-0.0574642	0.0436653	0.0995358	0.0359061
12.84	0.121117	0.0595027	0.103929		0.195273	0.0681428	0.0184869		0.0666678	-0.00908976	0.0994373	-0.0113503		-0.0387069	0.0130242	-0.0956873	0.0511248		0.0284206		-0.0121688		-0.0468689	0.0307554	0.0777032	0.0379156
12.86	0.113701	0.027185	0.120334		0.201623	0.0587824	-0.0169615		0.0802918	0.0221969	0.0548174	0.00285061		-0.0393848	-0.00345567	-0.0271072	-0.0245567		0.0127246		0.0561466		-0.0202839	0.0119261	0.0141309	0.0182642
12.88	0.0459948	0.03811	0.0835029		0.164102	0.0443673	0.0399648		0.0926781	0.0438953	0.0695589	0.0484902		-0.0168626	-0.0379469	0.164753	0.0670049		-0.0525354		0.00399642		0.0134433	0.00512875	-0.0372857	0.0495774
12.9	0.0867512	-0.0290789	0.125776		0.109925	-0.0131845	0.00708939		0.0830382	0.0281451	0.0845443	0.0415342		-0.0404225	-0.00683136	-0.0443117	0.0191407		-0.0364944		0.0272974		-0.0322288	0.0228338	0.00172553	-0.024717
12.92	0.0712061	-0.00248177	0.115208		0.0730515	0.0721209	0.0110032		0.0612638	0.0391108	0.0607046	-0.0416813		-0.0285829	0.0141049	0.248888	0.0547174		-0.0204441		0.085858		-0.0110117	0.034442	0.0117777	0.00285027
12.94	0.0760129	0.0536687	0.107797		0.369556	-0.0191004	0.0113477		0.0731013	0.023461	0.0582341	-0.00924226		-0.00420006	-0.0184336	-0.0719584	0.0241437		0.00877114		0.0879306		-0.00886083	0.0697821	-0.0459527	0.0202051
12.96	0.0968136	-0.00725995	0.0948983		0.172582	0.0601031	0.0194243		0.0865685	-0.00466267	0.0784743	-0.0727194		0.0092429	0.0176659	0.0149345	0.0201047		0.00655427		0.0666248		-0.0345063	0.0108184	-0.0705332	0.0610205
12.98	0.103013	0.0425435	0.133808		0.271542	0.0184745	0.0226922		0.110805	-0.0039001	0.0692658	-0.0342612		-0.0670911	0.00398748	0.0429342	0.00725685		0.0340083		0.131683		-0.00303302	0.0533144	-0.0379419	0.0393973
13	0.102567	0.0470097	0.114174		0.259332	0.0320257	0.00419469		0.105824	0.0226024	0.0723122	-0.0176772		-0.0219041	0.0283297	-0.167564	0.0365723		0.0158156		0.081959		-0.0151196	0.0302957	0.030783	0.0623763
13.02	0.119909	0.0166976	0.129643		0.254996	-0.00889439	-0.0518094		0.0803364	0.0226695	0.057446	0.050586		-0.0241116	-0.0206691	0.000978605	0.027017		-0.0225981		0.0193735		0.0302793	0.0146614	0.0338889	0.00867031
13.04	0.0770091	0.0606661	0.133329		0.119255	-0.0246072	-0.00447265		0.081588	0.0159437	0.0502886	-0.0247539		-0.0395395	0.0172732	0.139519	-0.0563478		-0.0121945		0.0845829		-0.0149364	0.0627894	0.0324256	0.047504
13.06	0.0928343	0.0467106	0.0682016		0.210798	0.169963	0.0290722		0.0794699	0.0297771	0.0521868	0.0059071		-0.0249641	-0.0414812	0.0746506	-0.0270174		0.011338		0.0291229		0.0131769	-0.0290562	-0.0366305	0.0819936
13.08	0.142221	0.0230747	0.125121		0.212771	0.0484721	0.0346563		0.0670654	-0.005088	0.0878391	0.0357175		-0.00425135	0.0199816	0.0438146	0.0212141		0.00424129		-0.0151897		-0.0643251	0.0388987	-0.0196587	0.0359799
13.1	0.0619837	0.0428599	0.108334		0.134049	0.0709174	-0.0247328		0.0854026	0.016743	0.0820696	0.00746731		-0.00645782	-0.0172328	0.0425884	0.0331022		-0.0221694		-0.0152397		-0.0310884	0.0725323	0.0458988	0.00187887
13.12	0.0697154	0.0288519	0.100877		0.244402	0.0213243	-0.0287214		0.0840169	-0.00875904	0.0487175	0.0179505		-0.0324069	-0.00812025	0.124314	-0.0065029		-0.0321311		0.0346485		0.0584938	0.0599855	-0.00781415	0.0255146
13.14	0.0984568	0.0129574	0.144336		0.183521	0.0811025	-0.0352106		0.0892905	-0.000827025	0.0722489	0.012057		-0.00561387	-0.0367265	0.118413	-0.0171407		-0.00513801		0.0322434		0.00757093	0.0561867	-0.0802006	0.0091372
13.16	0.0795572	0.0595238	0.119535		0.121486	-0.0343406	0.0271577		0.0805475	0.0339243	0.0354824	0.0411754		0.0621003	0.0163856	0.031236	0.0475164		0.00947435		0.0597621		-0.0411163	-0.0363799	0.0391908	0.00897458
13.18	0.124111	0.0273466	0.12245		0.185701	0.0366233	-0.0382883		0.0818469	0.0191465	0.0523709	0.0483598		0.0181353	0.00975073	-0.0078023	0.0568259		-0.0431668		0.0543703		-0.0285454	-0.0147826	0.0954438	0.00386817
13.2	0.0626872	0.0226842	0.084311		0.182272	0.0278818	-0.00815492		0.0825283	0.0430231	0.0819152	0.105861		-0.0361314	-0.0246414	0.0969269	0.0787893		0.00774094		0.0613568		-0.0332892	0.0819213	0.0331717	0.081771
13.22	0.0549153	0.0251222	0.107018		0.166516	0.0250293	0.042187		0.0865696	0.0220576	0.0619708	-0.02192		0.0319973	-0.0431904	0.284252	0.0227904		0.0081986		0.11194		0.00515735	-0.0319266	0.0277517	0.0501262
13.24	0.0977458	0.0530824	0.0659251		0.216976	-0.0391724	-0.00227264		0.0755783	0.0167549	0.0630972	0.0260062		-0.0148133	0.00126125	0.127777	0.0293326		-0.0089789		0.0428925		0.0106439	0.0228332	0.0389295	0.073742
13.26	0.10386	0.0338436	0.125304		0.213477	-0.0506717	-0.0162297		0.0728683	-0.000293364	0.0703671	0.0520484		-0.0336255	-0.00231978	0.0282549	0.0477979		-0.00213783		0.0254328		-0.0171123	0.0833871	0.0396167	0.0110144
13.28	0.105203	1.39333e-05	0.0661179		0.217521	0.0419357	-0.0146763		0.0759923	-0.00633077	0.0723947	0.0246011		0.0563428	0.0418376	-0.0657619	-0.00132439		0.0109135		0.00270928		-0.0112329	0.054521	-0.00214903	-0.0085832
13.3	0.0506197	0.0536536	0.108989		0.0900503	0.0832026	0.00368487		0.0819389	0.0104032	0.0663811	0.0716971		-0.0088096	0.000854354	0.1523	0.000366399		0.00383082		0.0318067		-0.000975193	0.0264846	-0.00606276	-0.0117715
13.32	0.0756512	0.0345082	0.121808		0.180574	0.0496359	-0.014385		0.0572507	0.0324459	0.0727063	0.0517867		0.010649	-0.0375451	0.156266	0.00242099		0.0255691		-0.0161012		-0.0402442	0.0303989	0.0461975	0.025776
13.34	0.105427	0.0543217	0.136854		0.215972	-0.0265792	-0.0389689		0.0911487	0.00713351	0.0334281	-0.0110682		-0.0115651	-0.0236757	0.0050415	0.00984711		0.0105107		-0.018235		-0.0651483	0.0519598	-0.0754561	0.0608986
13.36	0.0826468	0.0730902	0.0504268		0.190338	0.0730009	-0.00579784		0.0607198	0.037122	0.0643701	0.0132584		0.00884782	-0.0293122	0.193196	0.00678441		-0.0255048		0.0591893		0.0183044	-0.0107059	0.0308886	0.000472884
13.38	0.0935856	-0.0090565	0.134282		0.144238	0.089606	-0.0174148		0.0862099	0.0132662	0.0706118	-0.0198683		0.0428484	-0.0272026	0.0382968	0.000578874		-0.0171768		0.00504496		0.00647076	0.0439593	0.133961	0.0243925
13.4	0.0670921	0.0406207	0.14195		0.272836	0.112621	-0.00890526		0.0711482	0.0340065	0.0113683	0.0265583		-0.0136168	0.00769975	0.268543	-0.000613469		-0.0232636		0.00456672		0.0249556	0.0572287	0.0169342	0.0297759
13.42	0.0693786	0.0130505	0.121025		0.0987307	0.0366552	-0.0714022		0.0632662	0.0429771	0.07366	0.0351142		-0.0170974	-0.0549154	0.124206	0.00647683		0.023051		0.115958		0.00210707	0.0455181	-0.044304	0.00337669
13.44	0.0635454	0.0395163	0.0965925		0.256385	0.0283261	0.0162651		0.0762307	0.00206587	0.0572669	0.0447842		-0.00237781	-0.0151628	0.0189408	0.000786718		0.0285085		0.114165		-0.0300643	0.0538539	-0.0526113	-0.0144062
13.46	0.0842378	0.0317089	0.113042		0.126224	0.0921752	-0.017407		0.0675956	0.0207195	0.061327	0.0513041		-0.00390011	-0.0518479	0.0955436	-0.0285293		-0.0137093		0.073473		0.00263565	-0.00478974	0.0225724	0.0290506
13.48	0.0646217	0.0147845	0.118019		0.134726	0.0543234	0.0278777		0.0776528	0.0173276	0.0501315	0.0168576		0.0427391	-0.00809055	0.114383	0.0203694		0.00181027		0.0997821		0.00145046	9.4262e-05	-0.0288122	0.0108707
13.5	0.0672285	-0.0143405	0.0857385		0.184128	0.0281	0.0542666		0.0732548	-0.00528465	0.0543172	0.00440721		0.0214093	-0.00307002	0.143163	-0.0508161		-0.0210583		-0.00684414		-0.000592027	0.0182767	-0.0574834	0.0788639
13.52	0.0850176	0.0790395	0.0916981		0.150082	0.0862342	0.0167508		0.0698577	0.037436	0.0744439	0.0435596		-0.0143435	-0.00551183	-0.0187696	0.10433		-0.0118775		0.0699878		-0.0181257	0.0276742	0.0107608	0.0732503
13.54	0.0645933	0.0491406	0.12564		0.186424	0.0745183	0.0167971		0.0655533	-0.0115681	0.0514522	0.0464912		-0.0123707	-0.0201875	0.0231904	0.0430043		0.00760845		0.0361278		-0.0302414	0.0545951	0.0887959	-0.00268074
13.56	0.0510651	-0.0161429	0.104139		0.122855	-0.0334978	0.0366772		0.0731884	0.0192513	0.0632094	0.0100216		0.0384437	-0.020329	-0.0581316	0.0422832		0.0219687		0.10927		0.0078626	0.0451011	-0.0578167	0.101934
13.58	0.0698225	0.0698451	0.121354		0.237027	0.0477642	0.00948831		0.0760566	0.0118653	0.0885243	0.0188486		-0.0200731	0.00211244	0.168512	0.0161552		-0.0518381		0.091967		0.000846507	0.00225613	0.00528647	0.0610448
13.6	0.0890257	0.0488655	0.133067		0.180358	0.158233	-0.00907256		0.0864195	0.00885062	0.0572561	0.0546899		-0.0274446	-0.00147385	0.106671	0.0531834		-0.0410675		0.0745148		0.0197404	-0.00949822	0.0394449	0.0369073
13.62	0.0977299	0.00498595	0.0742632		0.125572	0.0311747	0.00709879		0.0682442	-0.0153367	0.0939827	-0.0140847		-0.0249383	0.0172598	0.0283163	0.0651256		0.0294277		0.0751595		0.0581343	0.0708049	0.12211	0.0155889
13.64	0.102809	0.0544267	0.110115		0.181831	0.0479056	0.0130908		0.0625024	0.0105643	0.0524538	0.0149297		-0.0169405	-0.00390602	0.0205616	0.0581699		0.0745358		-0.00805602		-0.0381147	0.0313018	0.0304294	-0.0158174
13.66	0.078958	0.0581987	0.133716		0.12862	-0.055269	-0.0209385		0.0760922	0.0359762	0.0371306	0.0771182		-0.0136167	-0.0151347	0.112653	0.0719369		0.0541378		0.0668881		0.00450158	-0.0429919	-0.0132803	0.0174804
13.68	0.0684698	0.0235652	0.113373		0.150607	0.018152	0.0519816		0.10522	0.00638212	0.0487924	-0.000405767		-0.0485457	-0.0245775	-0.0760446	0.034354		0.00304138		0.0105373		-0.032917	0.0123508	0.030071	0.0408854
13.7	0.0971784	0.0362604	0.0832258		0.105483	0.125589	0.0305223		0.0830357	0.0174544	0.0695627	0.0451005		-0.0284418	-0.0249075	0.0859375	0.0444634		0.00319035		-0.00818124		-0.0184785	0.0312665	0.0703383	0.00288144
13.72	0.0978542	0.0375162	0.12112		0.162329	-0.0790338	-0.00335873		0.0697711	0.00681044	0.0794114	0.0574864		-0.0155742	-0.0314991	0.0128211	0.00614131		-0.0429291		0.0603127		-0.0112512	0.0524532	-0.067319	-0.046675
13.74	0.0857018	0.012119	0.11076		0.0990789	0.010238	-0.00410477		0.0708233	0.0234516	0.0465497	-0.0221819		-0.0463386	-0.0329353	0.00952624	0.0559037		0.0150752		0.120675		-0.0452141	0.0349845	0.0214115	-0.0239906
13.76	0.076647	0.0347839	0.136742		0.114871	-0.00403109	-0.0302639		0.0775901	0.0100796	0.0732088	-0.00465196		0.0300121	-0.0127351	-0.0480461	0.069941		0.00360401		0.0471051		0.00712144	0.015528	0.00362803	0.0240842
13.78	0.0664266	0.0400237	0.0860916		0.0555032	0.0134646	-0.0162406		0.095152	0.0419176	0.0613744	-0.0118834		-0.029513	-0.00476884	-0.0316232	-0.0343683		-0.0332249		0.0759006		0.00975423	0.00463034	0.0262812	-0.0257328
13.8	0.0493659	0.0344286	0.112496		0.187518	-0.0785658	0.0323742		0.06858	-0.00197981	0.0871439	0.0362095		-0.0139394	0.00102444	-0.0088266	0.0663485		-0.0066726		0.0194772		-0.00803131	0.0324889	-0.0112631	0.0196255
13.82	0.112659	0.0107332	0.100513		0.207599	0.0502348	-0.01926		0.094347	-0.0254895	0.0687062	0.0672936		-0.0145616	-0.00708285	-0.0250361	0.0682833		-0.0102181		-0.0276276		0.0223393	0.0319731	0.0223302	-0.0323361
13.84	0.121634	0.0419674	0.120332		0.266155	0.0713728	0.0279773		0.0789098	0.00862364	0.050979	-0.00594948		0.00187675	-0.0283873	-0.0187976	0.0653233		0.0113309		0.0286583		-0.0160011	-0.000649118	-0.0433699	0.0269849
13.86	0.0502524	-0.00250585	0.085628		0.246413	0.0103602	0.0281406		0.0614232	0.0098495	0.0791271	0.0680145		-0.0396851	-0.000959523	0.138262	0.0549801		-0.0302433		0.00706596		-0.00617119	-0.0151668	0.0232213	0.00498119
13.88	0.0563841	0.0338574	0.107174		0.113315	0.0556331	-0.0266256		0.0766626	7.1987e-05	0.0823312	0.00763316		0.00386221	0.00144624	0.233706	0.013999		0.0344502		0.06346		0.00199044	0.0587965	0.00775546	0.0249807
13.9	0.0448426	-0.0194028	0.10526		0.11233	0.0623596	0.0188637		0.0698224	0.0493268	0.0556619	-0.0257866		-0.0441364	0.0563993	0.197663	0.0642551		-0.0151244		-0.0579634		-0.00456796	0.0465008	0.0133045	0.0240286
13.92	0.135896	0.0179247	0.0766912		0.158494	0.0515274	-0.0147628		0.0947737	0.0402956	0.0431305	0.0755788		0.0250003	-0.00360635	0.170581	0.0484878		0.00788525		0.037357		0.00499977	0.0514137	0.0339768	-0.0530871
13.94	0.0725546	0.011412	0.124616		0.245961	0.0440102	0.0130395		0.0736075	0.0306223	0.0412187	0.0297232		-0.0068555	-0.0217788	0.00720065	0.0273937		-0.0194716		0.0646871		-0.00105302	0.0312794	-0.0616107	-0.0426826
13.96	0.0902203	0.0175505	0.100788		0.184979	0.0390544	0.0486904		0.0969911	0.0040128	0.0642922	0.00627911		-0.00565741	0.0128929	-0.0255229	0.0152304		-0.0368921		0.0631701		0.00148025	0.00908923	-0.0316769	0.034296
13.98	0.0918596	0.074436	0.108537		0.161569	0.00210427	-0.0284248		0.076166	0.0260228	0.0468785	0.038849		-0.0239691	0.011877	0.0252898	-0.064023		-0.0186947		0.0602263		-0.0216863	0.0531748	0.0843861	0.0516855
14	0.091781	-0.0026292	0.0844652		0.185571	0.0196881	-0.00537848		0.070344	-0.00662445	0.0431319	-0.0175935		0.0268775	-0.0233434	-0.0579104	0.047664		-0.0274525		-0.0069084		-0.008572	-0.00768101	0.0662341	-0.00125308
14.02	0.077486	0.0228776	0.110032		0.138151	0.0549902	0.0443602		0.0666544	0.0231428	0.0567522	-0.0249999		-0.02793	-0.0794131	0.183013	0.0239818		0.0106263		-0.00866027		0.027244	0.01103	0.0799101	-0.0490806
14.04	0.0252585	0.00628847	0.134596		0.162412	0.0572865	0.000931996		0.0818261	0.0207063	0.0724407	0.085114		-0.00146327	-0.0194002	-0.020021	0.0414971		0.00555788		0.0470492		-0.0325447	-0.0210862	-0.0128283	0.0200867
14.06	0.10779	0.0347661	0.114918		0.213738	-0.023686	-0.00914536		0.094385	0.0425445	0.0439563	-0.0700507		-0.015925	0.0251339	0.0979142	0.0390909		-0.00822885		0.0067232		-0.0238969	-0.00371255	-0.0814767	0.0993074
14.08	0.0872265	0.0671421	0.101709		0.200567	-0.0622564	0.0237533		0.0712598	0.0121747	0.0626099	0.0297938		0.0277742	0.0181793	0.125035	-0.0116979		-0.022248		0.0768304		-0.0947734	-0.00602969	-0.0598029	0.0373686
14.1	0.0570912	0.0480399	0.100439		0.154236	0.0718622	0.0140017		0.0879467	-0.00352842	0.0384092	0.0601071		0.0177031	0.0232832	0.0393884	0.102704		0.0828451		0.0405253		-0.0186064	0.0272029	0.156858	0.00970223
14.12	0.0532062	0.0545438	0.0943534		0.114697	-0.0375541	0.0209444		0.0805987	0.0157808	0.0577386	0.0101031		-0.0414587	0.0173664	0.103783	0.0316438		0.0627446		-0.000161335		-0.0288826	0.046448	-0.0441227	0.0300458
14.14	0.0823066	0.0542055	0.103726		0.197145	-0.0166163	0.0478867		0.0741633	0.0172466	0.0446007	-0.00279796		-0.0221013	-0.0214829	0.148494	0.0200424		-0.0342453		0.0642849		0.0361444	-0.00128323	-0.0337033	0.061792
14.16	0.0399978	0.0120928	0.145002		0.148196	0.0600341	0.0453002		0.0675748	0.0135549	0.0540906	-0.0206221		0.014892	-0.029004	-0.0024007	-0.0185801		-0.0145464		0.00414149		-0.0223974	-0.0278282	0.0370297	0.0698161
14.18	0.0579333	0.0172886	0.117579		0.159917	0.0839765	0.0372853		0.0668515	0.00245767	0.0414895	0.000671096		-0.0204996	0.0272645	0.0421904	0.0455742		0.0115346		0.00589535		-0.0196221	0.0131498	-0.0817087	0.0188692
14.2	0.0740088	0.111714	0.073502		0.0576283	0.0766371	0.0267337		0.0938351	0.0222413	0.0635742	-0.0214573		-0.0015519	-0.0233111	0.0916589	-0.0192635		0.00936814		0.0402777		-0.0575905	0.00948695	-0.0340516	0.0224049
14.22	0.0405726	0.0503996	0.099209		0.150811	0.0479302	-0.00484987		0.0757451	0.0331602	0.0363643	0.0271082		-0.0024025	0.0143616	0.0439394	0.0465839		-0.0218103		0.101358		-0.0597375	-0.0101378	-0.0730846	-0.0465163
14.24	0.091363	0.0354793	0.118101		0.172369	-0.023595	-0.0177073		0.0623086	0.0150739	0.063476	0.0548121		-0.00329946	-0.0406586	-0.0608301	0.00999847		-0.0147687		0.0499451		0.0100811	0.0260201	-0.0101871	-0.00325241
14.26	0.0501336	0.0503766	0.085683		0.177351	0.0649686	-0.00304		0.0641095	0.00581911	0.0367355	0.0386712		-0.0142936	-0.0759949	0.0791776	0.0152153		-0.00736345		0.0196092		-0.0232735	-0.0093209	0.0381579	0.0215226
14.28	0.0709402	0.0418526	0.121561		0.164152	0.0702146	0.0153832		0.0749004	-0.0161825	0.0639892	0.0226359		-0.00368649	-0.0219201	0.0831422	0.0404536		0.0479915		-0.0297416		-0.00280871	0.0546791	-0.0501962	0.0144467
14.3	0.0575178	0.0228082	0.12772		0.159936	0.0835385	0.00823671		0.0739011	0.00497503	0.0470932	0.013411		-0.0102968	-0.0691925	0.0390711	-0.00711206		0.0127258		-0.00451295		0.0100453	-0.017332	0.0533758	-0.0502279
14.32	0.0658238	0.0287807	0.0828628		0.118902	-0.0573373	-0.0426562		0.05637	0.011892	0.0529769	0.0163828		0.0206907	0.00863127	0.0788616	-0.014681		-0.0254046		0.02371		-0.0310455	0.0360967	-0.0406579	0.0435657
14.34	0.0879017	0.0958301	0.0460971		0.224222	0.104942	0.00501566		0.0597079	0.0412837	0.0766747	0.0234644		-0.0121245	0.0168941	0.1602	-0.02187		-0.0258897		0.0363782		0.0406882	0.009477	0.0238207	-0.0107842
14.36	0.0601446	-0.0177445	0.0936066		0.140009	0.0796543	0.0136669		0.0710651	0.0114964	0.0704542	0.00926494		-0.041255	-0.0277012	0.0459376	-0.00282194		-0.0155581		0.0781661		-0.0182382	0.0122857	0.0624718	0.0226306
14.38	0.0526099	0.0584293	0.10527		0.105629	0.0295375	-0.013798		0.0513777	0.0106826	0.0192195	-0.084954		-0.0532425	0.0248126	-0.00171438	-0.0130474		0.043573		0.0522051		-0.0213877	0.024239	-0.10955	0.0294714
14.4	0.0322547	0.0479737	0.0728099		0.161849	0.120104	0.0281073		0.075952	-0.012705	0.0628492	0.0686133		0.0279665	0.00874224	0.0429968	0.0293351		-0.00172998		0.0267194		-0.0174427	0.0246334	0.056605	-0.020222
14.42	0.0602127	0.0950179	0.0913823		0.146904	-0.0124966	0.0321762		0.0677177	0.00781293	0.0537998	0.0617994		0.0414189	-0.00575016	0.0153844	0.0110778		-0.000567704		-0.00399807		-0.0240551	-0.00290575	0.0547167	0.109042
14.44	0.0990257	0.053305	0.103431		0.128759	-0.0378535	-0.00560204		0.0649075	0.041615	0.0618908	0.0176212		-0.00183961	0.0266971	-0.0746806	0.107109		0.00906213		0.0589772		0.0148759	0.0649676	0.0181824	0.0205002
14.46	0.0698895	0.0344165	0.11609		0.175799	0.0349251	0.0142649		0.0700751	-0.0049479	0.0546091	0.00873367		-0.0591743	-0.054775	0.113329	-0.0199044		0.0284383		-0.0245957		-0.00295799	-0.00130106	-0.0503873	-0.0392903
14.48	0.0500034	0.0219248	0.121887		0.134149	-0.0382074	-0.00747438		0.0544834	-0.00103024	0.0537342	0.0358522		-0.0151972	-0.0648561	-0.104989	0.0871063		-0.00944909		0.0796251		0.0232351	0.0468021	0.0593716	0.0184091
14.5	0.0536889	0.00387118	0.0828854		0.110497	0.150994	0.0578147		0.0803726	0.026427	0.0445669	0.020355		0.0212032	0.0218764	-0.0127914	0.0173339		-0.0444896		0.0492324		-0.0327829	0.0140415	0.0411618	-0.0155666
14.52	0.0798431	0.054666	0.0782428		0.168524	0.0180066	-0.0530591		0.0484871	0.0124328	0.0556388	-0.0383705		0.0145225	-0.00263807	0.304823	0.0296331		-0.0280763		0.029116		0.040537	-0.0141985	0.0957799	-0.0652286
14.54	0.0444524	0.0546005	0.069116		0.144073	0.00286195	-0.00394471		0.0566124	0.00594887	0.0296793	0.030413		-0.0335848	-0.0111378	0.0848294	0.0318893		0.0190299		0.0246768		-0.0573856	0.000919996	0.0237872	0.025219
14.56	0.051269	0.0193502	0.120767		0.160088	0.10273	0.018911		0.0562879	0.0156461	0.0498751	-0.00883502		-0.0116775	-0.0167346	0.231393	0.0251283		0.04689		0.101402		0.0199615	-0.00139472	0.0425485	0.0674147
14.58	0.0714787	0.0233256	0.107018		0.092831	0.00342256	-0.0202589		0.0609367	0.0136049	0.0427736	-0.014192		-0.0181991	0.0123812	0.103091	-0.0439838		-0.0372737		0.0981251		0.0148038	-0.00435132	0.0107369	0.0202651
14.6	0.0510183	0.0566333	0.0973248		0.101419	-0.0320226	0.0015197		0.058469	0.034851	0.0748308	0.0384622		-0.0455637	-0.00254959	0.0146525	0.0390983		-0.0187252		0.0368307		-0.0130834	0.0258232	0.058016	0.0333338
14.62	0.0357457	0.0295408	0.104176		0.0948894	-0.0391389	-0.0178722		0.0591119	-0.00378161	0.0742844	0.0716127		0.00672229	0.0090843	-0.0959102	-0.030744		-0.0259164		0.0676677		0.0459366	-0.0116595	-0.10022	0.0139948
14.64	0.0593516	0.0468038	0.112953		0.142385	0.0171979	0.00895708		0.0627665	0.0259253	0.0416341	0.00822563		-0.0264387	-0.0641905	0.0958488	0.0533241		0.00626593		0.0846217		0.0183587	0.0604349	0.120778	0.0129334
14.66	0.0599787	0.0497803	0.104391		0.12862	0.0137307	0.0427859		0.0593388	0.0294826	0.0326447	0.0196692	-0.0308046	-0.00462049	-0.0207028	0.0109953	-0.052353		-0.00133473		0.00609915		0.0121852	0.0343629	0.0415396	0.0211783
14.68	0.0807163	0.0761056	0.110207		0.13936	0.0279927	-0.00295631		0.0577224	0.00631759	0.0740992	-0.0718488	-0.0545465	0.00237046	0.0235077	0.0443913	-0.0126244		-0.019046		0.0678511		-0.0421781	0.0166	-0.0380732	0.0344486
14.7	0.0637855	0.0469913	0.0975398		0.179161	0.0195251	-0.0119796		0.0581035	0.00741883	0.0639655	-0.00312819	-0.0254799	-0.0310106	-0.00426855	0.0287751	0.0555007		0.00943104		0.0035192		0.0218795	0.0399417	0.0101916	-0.00655297
14.72	0.0711164	0.0243036	0.0917382		0.176099	0.0817714	-0.0146924		0.0555005	0.0086174	0.0712844	-0.0357648	-0.0386429	-0.00859115	0.0233127	0.0931915	0.0066969		0.00688423		0.0278395		-0.00468592	0.00767819	0.0183322	0.0213979
14.74	0.035566	0.0151928	0.099048		0.154931	0.105601	-0.0101428		0.0612115	0.0430289	0.05319	0.015107	-0.046674	0.023368	-0.018641	0.136554	-0.0226256		0.0157419		-0.00417216		0.0401393	0.0706679	-0.0539176	-0.0526051
14.76	0.0534678	0.0388082	0.112825		0.174766	0.047202	0.0168151		0.0455096	-0.0123876	0.0600527	0.029739	-0.0764287	-0.0330184	0.0229763	0.141997	-0.0741711		0.0296413		0.0797653		0.00662396	-0.0105136	0.0456983	0.0512099
14.78	0.0593457	0.0345295	0.0979306		0.155509	0.0540694	-0.00270733		0.0429891	0.015439	0.053114	-0.0036278	0.0183382	-0.00483774	-0.00780255	-0.0505211	-0.020816		-0.0194328		0.0135119		-0.0285781	-0.0104335	0.0537866	0.0211782
14.8	0.0565989	0.0445129	0.0881609		0.218326	0.189037	-0.0616394		0.0687616	0.000463874	0.0597365	0.0443044	-0.00362992	0.0409124	0.0104705	-0.00161399	-0.0131987		0.016522		0.0691555		-0.0245028	0.0661041	0.0436256	0.0230548
14.82	0.0657388	0.0246746	0.0876552		0.138191	-0.0193678	-0.020471		0.0570218	-0.00613025	0.0528929	0.0764545	-0.0546596	-0.00345838	0.0160254	0.0337054	0.00637922		0.013117		0.0482012		-0.0290248	0.00238522	0.0438375	0.0380437
14.84	0.0852962	0.0430009	0.0874158		0.185004	0.0387905	0.023078		0.0636578	0.00999576	0.057654	-0.0419754	-0.0470689	-0.0157112	0.0168961	0.0883239	-0.0100198		0.0096676		0.0131588		0.00787915	0.040744	-0.0591485	0.0146367
14.86	0.0466353	0.022891	0.0771202		0.15657	-0.00155335	0.00874758		0.0485337	0.00147741	0.0451298	-0.0238188	-0.00471892	-0.0460338	-0.00166341	-0.00960272	0.0153501		0.0464088		0.0633186		-0.0216072	0.0225086	-0.0207059	0.0149269
14.88	0.0650118	-0.00766639	0.0772319		0.139099	0.112526	-0.00272108		0.0484809	0.0307978	0.0183135	0.0302433	0.0358941	0.00336082	-0.0459748	-0.0647268	0.0531714		-0.026682		-0.0132861		0.00266037	0.012247	-0.0533902	-0.0263837
14.9	0.0465258	0.0602839	0.0980107		0.14904	0.00676597	-0.00707237		0.0349999	0.0067419	0.044728	0.000307627	-0.105432	-0.0351525	0.0211097	0.144171	0.0603497		-0.000351324		0.0356644		-0.0384271	0.0204523	0.0282173	-0.0185526
14.92	0.0594063	0.144533	0.100922		0.157767	0.000740429	0.0261441		0.0523618	-0.0144769	0.0583495	0.00795926	-0.00740396	-0.00633618	0.0297669	0.113384	0.00449737		-0.0114184		0.0279303		-0.0469134	0.0463335	0.0652444	0.000932648
14.94	0.0825171	0.0757293	0.0986214		0.104764	0.0737801	-0.0303273		0.0395668	0.0288245	0.0460595	-0.00931868	-0.0462185	0.0322376	0.0166841	0.0258306	0.0747671		-0.015166		0.0610683		-0.0389115	0.0396169	-0.0242026	0.0572945
14.96	0.0791776	0.0105316	0.168296		0.123518	0.0343446	-0.00740993		0.0570557	0.00708448	0.0690866	0.0424104	-0.04152	-0.0120358	-0.032023	0.0878531	0.0100851		0.0247363		0.0886268		-0.0496053	0.0214345	-0.0623512	-0.00455348
14.98	-0.0109694	0.00369363	0.0835298		0.119264	0.0344163	0.0103784		0.0751916	0.0181643	0.0353758	0.0173986	0.01745	0.0256328	0.0433748	0.0181304	0.0633913		-0.0131832		0.0527005		-0.0103467	0.0455006	0.07304	0.00106566
15	0.0770508	0.0626725	0.0814078		0.208823	0.0603187	-0.038705		0.0541452	0.0350991	0.0627641	-0.0852858	-0.00537466	-0.0088727	-0.0485163	0.0839148	-0.0110708		-4.77388e-05		0.0762058		-0.0195188	0.0130799	0.0369196	0.0145253
15.02	0.100487	0.0194397	0.0907478		0.247876	0.141035	0.0341356		0.0429101	0.020074	0.0606212	-0.0200439	-0.0579272	-0.0642609	-0.00110964	0.192953	0.0034469		-0.00612841		0.0316378		-0.0455465	-0.0257604	-0.0380103	0.0618941
15.04	0.0898267	0.0776921	0.0849366		0.127339	0.0156891	-0.00116843		0.0417497	0.0157389	0.0273248	-0.0418735	-0.0328936	0.028734	0.0184666	-0.0157229	0.0248205		-0.0379958		0.0225225		-0.0437466	0.0415664	0.060344	0.0643211
15.06	0.0803998	0.070295	0.098859		0.256972	0.039393	0.0170546		0.0586225	-0.00487921	0.045774	0.0354708	-0.0800806	-0.0366669	-0.0226663	0.225216	0.013881		-0.0174281		0.0738041		-0.0286937	0.025303	0.0272726	0.0181058
15.08	0.0717049	0.00433953	0.119125		0.142976	0.0089511	0.0235132		0.0515479	-0.0191817	0.0722952	-0.0258069	-0.0813548	-0.0186615	0.00405389	0.0101133	0.025757		0.0402201		-0.034711		-0.0180139	-0.0235996	0.034362	0.00954834
15.1	0.097566	0.012566	0.0896042		0.181447	-0.00286009	-0.00422168		0.0540897	0.015701	0.0363652	-0.0239903	-0.043542	-0.0117879	0.0108656	-0.0566287	0.0419932		-0.0227997		0.0189954		0.000449712	0.0274649	0.120822	0.0124277
15.12	0.0627388	0.0488694	0.111998		0.14852	0.0167682	-0.0154981		0.0615865	0.0106917	0.0571762	0.00985099	-0.0182854	0.032759	-0.0178582	-0.00380056	-0.0263425		-0.0261231		0.125471		-0.0620252	-0.035812	0.0133019	-0.064679
15.14	0.066305	0.0562173	0.0923422		0.0919396	0.102669	-0.0184109		0.0484497	0.0359061	0.0275328	0.0521395	0.0335408	0.0140112	0.00457133	0.0473527	-0.00624522		-0.0112155		0.0452715		-0.00150985	0.000202038	0.00628271	0.0204849
15.16	0.005058	-0.00731724	0.0977662		0.0948301	0.00790708	-0.00743678		0.0615597	-0.0137014	0.0541264	0.0381563	-0.0251071	0.029436	0.0216967	0.143392	0.00212069		0.0419581		0.0206414		0.0332596	0.0121749	0.0141592	-0.00319122
15.18	0.0326266	-0.0165366	0.105846		0.145889	0.0417662	-0.0408599		0.0499854	0.0191576	0.0425906	0.0289413	-0.0807049	-0.000254691	-0.034326	0.00354914	0.0494174		0.000819989		0.0292591		-0.0485725	0.0305103	-0.07252	0.042195
15.2	0.0847937	0.0599875	0.0709672		0.227805	-0.0832786	0.0805275		0.0513106	0.0132932	0.0651011	-0.0226145	0.0722244	-0.0416454	0.00547412	0.0169825	0.0105924		0.0115254		0.00653454		0.0329447	0.0352293	0.0360233	0.0487916
15.22	0.0725943	-0.0157886	0.095263		0.0949471	0.0611714	0.0029974		0.0554062	-0.0208268	0.0168902	0.0647616	0.0257248	-0.0141763	-0.0608661	0.161758	0.0145875		0.023448		0.00565996		0.0042161	0.0639652	0.0502999	0.0574921
15.24	0.0546948	0.0262592	0.11185		0.138151	0.0208273	0.0128056		0.0723409	-0.00155218	0.0497859	0.0359115	-0.0496292	0.0213534	-0.00717306	-0.0533666	0.0190591		-0.0480883		0.114895		-0.0318282	0.0120354	0.0555384	0.00191544
15.26	0.0617321	0.0263711	0.0942939		0.135691	0.0767882	-0.0218171		0.0279699	0.00822471	0.0514083	-0.0441282	0.0297354	-0.0124134	0.0170356	0.104408	0.0376246		-0.0158227		0.072914		-0.0134219	0.0124673	-0.00591736	-0.0182619
15.28	0.041263	-0.0153234	0.0926582		0.127921	0.0275688	-0.0320245		0.0550574	0.0177731	0.0545523	-0.0152914	0.00115928	0.0092817	-0.0305435	0.0669496	-0.00163426		-0.0639213		0.064856		-0.00641187	0.0086712	-0.00482228	0.035464
15.3	0.063902	0.0840736	0.0677295		0.187286	0.051644	0.0045471		0.0526146	-0.0203471	0.0691603	0.023749	-0.0277753	-0.0377069	-0.0658641	0.310327	-0.0598137		-0.0114044		0.0598194		-0.0181489	0.0112756	-0.0609991	0.039746
15.32	0.0800422	0.00405955	0.14577		0.120182	0.0180938	-0.0118142		0.0756946	-0.000753221	0.0556761	0.00517581	-0.0632912	-0.0302721	0.0186652	-0.0143573	0.0671478		0.00491275		0.000929548		-0.00643057	0.0170953	-0.0167756	0.0521908
15.34	0.0379789	-0.00989438	0.0854126		0.122987	0.0863416	-0.0140436		0.0609823	0.0109266	0.00638776	-0.0254341	-0.0169525	0.0220563	0.00369896	-0.00682034	0.0525404		-0.0333461		0.0699178		-0.0109696	-0.0246612	-0.0153785	-0.0558519
15.36	0.0112956	0.0108443	0.0966372		0.131691	-0.0691211	-0.0261209		0.0360533	0.0293538	0.0548968		-0.038709	-0.0430493	-0.00851399	0.0203257	-0.0161978		-0.00410515		0.0870477		0.0066402	0.0209794	0.026868	0.0527372
15.38	0.0631016	0.0580422	0.0602818		0.0983305	0.0906359	-0.0263114		0.0394044	-0.0021867	0.0333712	-0.00868024	-0.0105499	-0.0390873	0.0220014	-0.000196946	0.0474721		0.00555782		0.102001		-0.0070507	-0.0439281	-0.0297863	0.0372533
15.4	0.0261874	-0.0080881	0.112132		0.0942276	-0.031806	0.0402382		0.0538509	0.0195242	0.0450441	-0.0348881	0.0333496	-0.0197728	0.00582978	-0.0882693	-0.000870625		0.0178442		0.101009		0.00488161	-0.0080262	0.0452945	0.0444995
15.42	0.0626846	0.0658013	0.140486		0.203042	0.0801832	-0.013292		0.0676088	0.0244065	0.0530646	0.0108816	-0.0350285	0.0293621	0.0142969	0.0567326	0.00606153		-0.000344036		0.0277142		-0.00463393	0.0278002	0.059771	0.0634767
15.44	0.0202235	0.0469439	0.0850392		0.122808	0.0213464	0.000407906		0.0449791	0.0125278	0.0470258	0.00114668	-0.0558366	-0.0139481	-0.0412002	0.20114	-0.00665907		0.0355368		0.0589059		0.0122461	-0.015622	-0.0509035	-0.00898386
15.46	0.0419572	0.0213273	0.0900276		0.154389	0.0366127	0.0445157		0.0449922	0.0448467	0.057011	0.0301877	0.00357755	0.000805455	-0.00902682	0.0290133	0.0204272		-0.0376447		0.065545		-0.000154233	-0.0197884	0.0388559	-0.0181521
15.48	0.0431693	0.0214156	0.0902129		0.148679	0.0714639	0.0316803		0.0603764	0.0284865	0.0426369	0.06539	-0.0768181	-0.0354264	-0.00105195	-0.0111892	-0.000427142		-0.0116633		0.00713028		0.026679	0.0220375	0.0502908	-0.0242415
15.5	0.0577854	-0.00352689	0.0870148		0.143536	0.0642894	-0.0224994		0.0616126	-0.00109453	0.0571254	-0.0298512	-0.0164229	-0.0431315	-0.0406246	0.00845823	-0.00415279		-0.0287985		0.0579867		-0.0247619	0.0287957	-0.0176724	-0.00242594
15.52	0.0989022	0.0686347	0.105702		0.188662	0.0432808	0.00339866		0.0514719	0.000288904	0.0305267	-0.0220625	0.0290843	0.000746126	-0.0203417	0.0415435	0.0391888		-0.00829454		0.0138913		-0.00364828	-0.0142149	0.0075073	0.0345369
15.54	0.0410935	0.04484	0.0238439		0.15421	0.0545618	0.0203692		0.0235061	0.0070492	0.0469828	0.0578572	-0.00278145	0.0111771	-0.0367593	0.0688176	0.029442		0.028982		-0.0090214		-0.0281994	0.0229918	0.019895	-0.00254127
15.56	0.062	0.0711948	0.102648		0.193826	0.180397	0.0144753		0.0565758	0.0145571	0.0625011	0.0166728	-0.0120866	-0.0108578	-0.0417337	0.0288079	-0.0129717		0.00602029		0.0161831		0.0818873	0.0198173	0.0033868	0.00649222
15.58	0.0841845	0.0632801	0.0938099		0.210198	0.0366881	-0.0113974		0.0397227	0.0288545	0.0614036	0.0575709	-0.0554805	-0.0101688	-0.020938	0.0841037	0.0234007		-0.0127312		0.0127337		-0.0325403	-0.0519793	0.0902441	-0.0306014
15.6	0.0448719	0.000742313	0.0531846		0.170574	0.0797883	0.0108907		0.051343	0.00520751	0.0497243	0.0393881	0.0322663	0.00036721	-0.0168751	0.0567904	-0.0216664		0.0329299		0.0448541		0.0300768	-0.00896757	-0.0220563	-0.0197295
15.62	0.0407329	0.126472	0.0719782		0.192231	0.0575942	0.00237076		0.0502069	0.00535139	0.0257456	0.0552678	0.0165172	0.00613729	-0.000481153	0.00656987	-0.0263374		-0.0195827		0.00316262		0.00418741	0.0184629	0.0558258	-0.0130523
15.64	0.0847806	0.033053	0.0895591		0.0569164	0.0282253	0.0150037		0.0585158	-0.00920544	0.0469793	0.0429123	-0.0857442	-0.019502	0.00861163	0.0490305	0.0150602		-0.0107645		-0.00989144		-0.0208868	-0.0651934	0.00632042	-0.0517242
15.66	0.0463722	0.0477693	0.0679987		0.075484	0.0686137	0.0225808		0.0564397	-0.00394697	0.0384936	0.0563795	0.0592108	-0.00744628	-0.00344479	0.132043	0.0120384		-0.00756849		0.0160103		-0.0454508	-0.00620254	0.0318468	0.0122255
15.68	0.0687556	0.0135974	0.0959185		0.108428	0.0087017	0.0100668		0.0450136	-0.00352541	0.0391685	-0.0148271	-0.0589818	-0.0592408	0.0212039	0.0526335	0.0365295		0.00876146		0.0845748		-0.0394509	0.00725154	0.0764061	-0.00950459
15.7	0.102945	-0.00394525	0.101166		0.144444	0.0146578	0.0045705		0.0547108	0.0363423	0.020448	0.0561808	-0.0518201	-0.0259929	-0.00161857	0.0518898	0.0126105		0.00209242		-0.0317624		-0.0297273	0.0340257	0.0141542	-0.0504427
15.72	0.0800147	0.0303057	0.094694		0.142387	0.0913326	0.0274608		0.057975	0.00601518	0.0472416	0.0290362	-0.0480318	-0.0470581	0.0160621	0.0441331	-0.0285663		-0.0176388		0.0238651		-0.0562699	-0.014966	-0.0554943	0.0524945
15.74	0.0256509	0.0683372	0.0792375		0.171685	0.0753847	0.00612164		0.0698963	0.0143367	0.0391393	0.0785239	0.00223601	0.0339282	-0.0717	0.0369376	0.0143024		0.0243178		0.0325378		0.0169246	0.00621053	0.051572	0.0470022
15.76	0.0716838	0.0140268	0.0882446		0.203553	0.00870705	-0.0060278		0.0332209	0.00932808	0.0469287	-0.0315865	0.00795979	0.0152529	-0.0168083	0.0181773	-0.0137031		-0.0477638		0.0129549		0.0278371	-0.0320508	-0.037784	0.00174419
15.78	0.0130197	0.0206757	0.118964		0.201712	0.00787851	0.0277974		0.036562	0.0167355	0.0546434	0.0338883	-0.0346213	0.0412731	0.00866285	-0.00363351	0.0208217		-0.00754527		0.047655		-0.0221932	0.0444364	0.0762876	0.0197971
15.8	0.0562802	0.0406812	0.079627		0.284184	-0.0109325	0.015839		0.0381702	0.0255199	0.04557	-0.0234477	-0.0250131	-0.0239705	-0.0417572	0.0506533	0.0291588		-0.0137703		0.0191406		-0.0222102	0.0213043	0.0315564	-0.00342777
15.82	0.0298778	0.0747737	0.0921087		0.0886374	-0.00864012	-0.0448889		0.0549618	0.0102651	0.0548634	0.0203012	-0.034344	-0.0136684	-0.00752493	0.0614315	0.0265273		0.00386744		0.0685124		0.0372617	0.00651918	0.0519512	-0.0270499
15.84	0.0719913	0.0566945	0.1291		0.135527	0.0054431	-0.0618742		0.0460049	0.0092751	0.0432334	0.0456692	-0.02489	0.00104289	-0.0148626	0.146337	0.00989698		0.00209247		0.120595		-0.0535056	-0.0135377	0.101703	-0.0188163
15.86	0.0738737	0.0388138	0.0923469		0.133173	0.0726012	-0.00880612		0.0543486	0.024762	0.0496918	-0.0197682	0.0173389	0.0131631	-0.0177812	-0.00991197	0.0379164		-0.0167781		-0.0194619		-0.0423354	0.0221015	0.0788216	-0.0621533
15.88	0.0837365	-0.0529304	0.111022		0.0684301	-0.133931	0.014829		0.0478257	-0.0133506	0.055382	0.0432579	-0.0284352	-0.0766363	0.0114878	0.101905	0.0311516		-0.0307382		0.00514931		0.0152582	0.0329023	0.0721486	0.0358826
15.9	0.0632731	-0.00636869	0.0675092		0.14792	0.030556	0.00556156		0.0407937	0.020459	0.0730377	0.024778	-0.00599408	0.0131809	-0.0151702	0.0799739	0.0292527		0.0554875		-0.0427378		0.0246258	0.0401938	0.0341875	0.0359665
15.92	0.050803	0.0566666	0.0870752		0.112119	0.0805079	0.0213192		0.0499792	-0.00734225	0.0398526	-0.0274859	0.0164173	-0.0262752	-0.024847	0.0657342	0.0519261		0.0223333		0.0486061		0.00996673	-0.0247915	-0.0463709	0.0109425
15.94	0.0344215	0.0425729	0.0984646		0.140676	0.0428615	-0.00561684		0.0335701	0.0373053	0.0822443	0.0471011	-0.00307539	-0.000222879	0.000455123	-0.0498016	0.0161796		0.000595494		0.0460784		-0.0324527	0.0178862	-0.0812354	0.0576908
15.96	0.0278118	0.0584617	0.0822993		0.120284	-0.0292657	0.0693693		0.0579757	-0.0158108	0.0725726	0.058464	-0.0693047	-0.0352866	-0.0318704	0.0174663	0.0547684		-0.03271		0.0399059		0.0475831	0.0242338	-0.00932277	0.0171229
15.98	0.0436089	0.0315024	0.101962		0.143737	0.019119	0.00710708		0.0323952	0.0482573	0.0604722	0.0305274	-0.0139131	-0.0104469	-0.030255	0.0280917	-0.0675458		0.0330052		0.0724562		-0.0375398	0.0416381	0.0452821	0.0162233
16	0.0995803	0.102792	0.12266		0.149178	0.00984564	-0.0130024		0.0406849	0.00177879	0.0320026	0.0339607	0.0394607	-0.0231533	0.0191148	-0.0217248	0.0295169		-0.0158122		0.0475334		0.00438273	0.0374939	-0.0664256	-0.00159027
16.02	0.0528316	0.0482975	0.107999		0.111456	0.107013	0.0466253		0.0450517	-0.00574445	0.0651189	-0.0146195	0.0405581	-0.0169879	-0.00762425	0.0533101	-0.0384077		-0.0156467		0.0166298		-0.00133875	-0.0556853	-0.0600945	0.025355
16.04	0.0861344	0.0622362	0.0978689		0.121199	0.045842	-0.00348188		0.0429566	0.00210905	0.0419509	0.055962	0.00998208	-0.0313586	-0.0762626	0.00608176	0.0745652		-0.0316804		0.0491698		0.00224422	-0.0277199	0.0227775	0.0219733
16.06	0.0297489	0.00612497	0.106724		0.256283	-0.004406	0.00204865		0.0415028	0.0216875	0.0473328	-0.0559665	-0.0104252	-0.0213047	-0.011321	0.0992591	0.00728868		0.000312887		0.0688673		0.00219753	-0.038019	-0.0603142	-0.0319481
16.08	0.0507591	-0.0316353	0.0750814		0.125708	0.050897	-0.0135216		0.0320607	0.0119461	0.0652064	0.0171627	0.0309711	-0.00288576	-0.0197439	-0.0869262	-0.0104358		-0.0118362		0.0429016		0.00214779	0.0314806	-0.0633358	0.0648528
16.1	0.0487856	0.0719737	0.088186		0.0932521	0.0318849	-0.00255768		0.0316114	0.0125154	0.0209833	-0.0247627	-0.00610167	-0.00458494	0.017298	0.0283447	0.0240384		-0.024173		0.0694643		-0.000809373	-0.0334189	0.120243	-0.00732382
16.12	0.0628593	0.0014478	0.0772062		0.132869	0.0186227	-0.0409623		0.0338519	0.018138	0.0524735	0.0163479	0.000268772	-0.0205318	-0.0393306	0.0117651	-0.0223419		-0.00714996		0.0874651		-0.0452635	-0.0185021	0.05244	-0.00471532
16.14	0.067252	0.0692478	0.0593159		0.108661	0.0612414	-0.0607317		0.0433961	0.0210994	0.0472709	-0.029029	-0.0457704	0.0576753	-0.0377854	-0.0692034	-0.00946254		-0.00278458		0.0159298		0.00706426	0.00439499	0.0228559	0.0109087
16.16	0.0194759	0.0965776	0.136807		0.169877	-0.0173413	0.012765		0.0463368	0.0156219	0.0563227	0.0517653	-0.105594	-0.0265565	-0.0149306	0.0148335	-0.0607809		0.00739037		0.0110022		0.0722138	0.0265277	-0.0111269	0.0158564
16.18	0.0531873	0.0190347	0.0799412		0.118486	0.104725	0.0191331		0.0574355	0.00800491	0.0524725	0.027729	-0.0908374	-0.0429252	-0.00970826	-0.00283298	0.0393186		-0.0112022		0.0860927		-0.0219949	0.00217553	0.031265	-0.0254858
16.2	0.0527875	0.0328431	0.0846304		0.11556	0.0428595	-0.0146848		0.0349858	0.0230233	0.039068	-0.0248529	-0.0166418	-0.0312875	0.0116154	0.0357216	0.00973967		-0.0304086		0.102755		0.00705113	-0.00565894	0.00358812	-0.00650812
16.22	0.0633966	-0.0132386	0.0762089		0.23676	0.0551912	-0.00693551		0.0371856	-0.0138259	0.0456059	0.00962916	-0.0461818	-0.0294479	-0.0542191	0.0998036	-0.0460803		-0.0188967		-0.0180855		-0.0352763	0.0313719	0.0192805	0.0127258
16.24	0.0587221	0.000629164	0.0880135		0.0385213	0.0237818	0.0443433		0.0638761	-0.00108614	0.0315297	0.0189055	-0.0435079	0.00417174	-0.029709	-0.0105204	0.0922171		0.00248965		0.0395882		0.0122381	0.0437653	0.0199828	0.00197044
16.26	0.0878211	-0.0137402	0.121651		0.160626	0.0072495	-0.029521		0.0349848	0.0223021	0.0534211	0.0905544	-0.0210751	0.00983608	-0.0113761	0.103833	-0.0472675		0.00394063		0.0277624		0.0417091	0.00166261	0.0625708	0.0488367
16.28	0.0365153	0.0137635	0.0731506		0.0896958	-0.0820293	-0.0212525		0.0218029	0.00544607	0.0574051	0.0275898	-0.0289394	-0.0422383	0.00458668	0.0673476	0.0442457		-0.017857		0.0849682		-0.00643283	-0.000869676	0.0634501	-0.0993843
16.3	0.0918761	0.0559029	0.0976061		0.195816	0.039945	0.054914		0.060192	0.0313329	0.0536205	0.0639597	0.0207404	0.0316002	-0.032156	0.00799861	0.0538592		-0.000286493		0.00881383		-0.0139582	-0.00663382	-0.04607	-0.0881441
16.32	0.0373237	-0.0125428	0.10505		0.131413	-0.0831706	0.0187957		0.0469068	-0.0123744	0.0567007	0.010437	0.0245535	0.0201675	-0.000759299	-0.0380413	0.0379671		-0.0336189		0.0620739		-0.0303439	0.047771	0.00629606	-0.0149386
16.34	0.0415112	0.0101251	0.0584036		0.101136	-0.0518959	0.0175457		0.0512654	0.00135631	0.0471515	0.021262	0.101244	0.00226584	0.0301593	0.0254639	0.004246		-2.40067e-05		0.0355748		-0.0637714	0.0256708	0.0309379	0.0440371
16.36	0.0287968	-0.00557157	0.128551		0.168446	0.0561501	0.013626		0.0283249	0.0304298	0.0505022		-0.0744017	0.0428629	-0.0178227	-0.00919711	-0.0570076		0.0354112		-0.0113558		-0.00493537	-0.0459013	0.038238	0.0193466
16.38	0.0565743	0.0045042	0.121075		0.12612	-0.0188435	0.0433823		0.0296214	0.0592869	0.0398129	-0.00677407	-0.0109443	-0.00658026	-0.0396733	0.136732	0.00655823		0.0564539		0.0499687		-0.00907521	0.0335432	-0.0789165	0.00811171
16.4	0.0363055	0.0562305	0.0974406		0.151374	0.0386503	0.00102473		0.0267353	0.0113821	0.0589313	0.0933066	-0.0087298	-0.0179837	0.0102489	0.0266574	0.0119677		-0.0144041		0.00412781		0.0535517	-0.054985	-0.0222721	0.0237185
16.42	0.0587351	0.0503426	0.0857011		0.22509	0.0487808	-0.0177656		0.0342782	0.00374913	0.0613235	-0.0315703	-0.0744818	-0.0232943	-0.00971213	0.185556	-0.00909399		-0.0108016		0.0276299		-0.0327943	0.0469648	0.0172506	0.0585239
16.44	0.00114666	-0.0193016	0.0947299		0.092055	-0.056307	0.013226		0.034985	0.041628	0.0397861	0.0172057	-0.101353	-0.0135778	-0.0543508	0.159252	0.00296058		-0.00518587		1.44138e-05		0.00455065	-0.0203341	0.0157808	-0.00892604
16.46	0.0459227	0.00902948	0.0998926		0.0789286	0.124254	0.0165703		0.050413	0.0269198	0.0621836	-0.00976411	-0.0830482	-0.0226943	0.0192607	0.0568164	-0.00640023		-0.0287871		0.082385		-0.0181714	-0.0321569	-0.046132	-0.0408565
16.48	0.0285588	-0.0149844	0.0830149		0.0940236	-0.0284578	0.0115184		0.0468305	0.030976	0.0429292	-0.00874095	0.0136349	0.0511344	-0.000473295	-0.0880621	0.00591343		0.0211264		-0.016099		-0.0157211	-0.0084491	-0.0520204	0.0475588
16.5	0.0240848	0.00441827	0.0929703		0.0642849	0.0531434	0.0122721		0.0571763	-0.00387812	0.0613539	0.005161	0.000824799	-0.0241046	-0.00319556	0.174321	0.0432416		0.0187181		0.0579593		-0.0231884	0.0198318	0.043675	0.0387398
16.52	0.0464406	-0.0358299	0.104593		0.148033	0.079395	-0.0137804		0.066271	0.0451751	0.0409277	0.0457971	-0.0320657	0.00761642	-0.00156667	0.00619529	0.0650372		0.00881173		-0.00204845		-0.0340297	0.0108285	-0.0241905	0.00414825
16.54	0.0498453	0.046172	0.071139		0.10524	-0.019284	-0.00907631		0.0570635	0.00538627	0.0589031	0.0636344	-0.056045	0.0120308	-0.0120866	0.135261	-0.0291284		-0.0137499		-0.0112304		0.047158	0.00968037	-0.0101055	-0.0431994
16.56	0.0494382	0.0279077	0.111942		0.134356	-0.0686078	0.00133847		0.043138	0.00611486	0.0581156	-0.00157255	-0.0408883	-0.0147229	-0.0111451	0.0149792	0.0401369		-0.00427994		-0.00803913		0.0564667	0.00787659	-0.0489611	0.0278627
16.58	0.0382499	0.0902139	0.0772723		0.128841	0.0738889	0.0133899		0.0573724	0.0155903	0.054301	0.0553455	-0.0413261	-0.0313175	-0.0600567	0.0746107	0.0612973		-0.0226738		0.15261		-0.0319037	0.00724012	0.00172826	-0.0129334
16.6	0.0246477	0.0160913	0.0332528		0.11841	-0.0871131	-0.0442759		0.0600898	0.0348085	0.0440123	0.0193268	-0.0732624	-0.0253053	-0.0324223	-0.0303496	-0.00891472		0.00160746		0.0803891		-0.058627	0.0340291	-0.00731245	-0.00433824
16.62	0.00302263	0.0271445	0.0383405		0.109284	0.0222112	0.00912428		0.073144	0.0415475	0.0457895	-0.00675841	0.0394156	0.0285149	0.00495241	-0.0650295	0.0412185		0.0484271		-0.0158199		0.0177789	-0.0154137	0.157314	0.0374061
16.64	0.0535584	0.109823	0.0989855		0.174259	-0.027897	-0.025817		0.0627118	0.0449119	0.0404689	0.00734587	0.0112335	-0.0372733	-0.0280553	-0.0127615	-0.000724612		-0.0418268		-0.00869295		-0.0128704	0.0325063	-0.0666358	0.00534901
16.66	0.0448116	0.00218089	0.0907576		0.130945	-0.0134621	0.0272883		0.044142	0.0456812	0.05521	0.0313563	-0.0294589	0.00986282	0.00997656	-0.0222452	0.0192452		0.0108983		0.0228319		-0.0205034	0.00510917	-0.00637862	0.0442985
16.68	0.0671779	0.0583417	0.0988135		0.178075	0.0584221	0.0130303		0.0656149	0.0295894	0.0628504	-0.0306865	0.000146281	-0.0140292	-0.063102	-0.0487875	0.0456676		0.0147772		0.0371926		-0.0699513	-0.0197176	0.031823	-0.0104914
16.7	0.0269678	0.0406037	0.130461		0.119045	0.10775	-0.00733116		0.037757	0.0247134	0.059674	0.00236242	-0.0501294	0.0218111	0.0108431	0.123373	0.0298		-0.00220681		0.0725322		-0.0257901	-0.00572447	-0.0808247	0.0323176
16.72	0.0671809	0.0821025	0.104442		0.14789	0.0999113	0.0152002		0.0637811	0.00630372	0.0545745	0.0396019	0.000804652	-0.0128667	-0.0353377	0.0329085	-0.0325608		-0.0159698		0.0147681		-0.0122508	0.0593442	-0.0671809	0.0225291
16.74	0.0760315	0.0456564	0.106849		0.120534	-0.000696103	-0.00314728		0.066582	0.0187422	0.0322238	-0.0177663	-0.00388055	-0.0275536	-0.00337254	-0.0474397	-0.0329222		0.00517478		-0.0209084		-0.00234176	0.0199724	0.0253851	0.0602872
16.76	0.0471442	0.000980807	0.0835209		0.178974	0.0565088	-0.0628224		0.0557771	0.0380158	0.071399	-0.01405	0.00677621	-0.0424127	-0.0368702	-0.0269499	-0.0350822		0.0232498		0.00234139		0.0109136	-0.0129513	-0.0416847	-0.0348745
16.78	0.078669	-0.0266151	0.0756274		0.128573	0.0320437	-0.0214857		0.0620215	-0.00850929	0.0422776	0.0587693	-0.0143175	0.00997073	0.00193348	0.166424	-0.00504047		0.00322998		0.0344663		-0.0100439	0.0224955	-0.0349207	0.045789
16.8	0.0857564	0.0219951	0.115162		0.122989	0.0309195	0.00250696		0.0416122	-0.0115405	0.0462698	0.0200426	0.0312538	0.0406393	-0.0141989	-0.0592112	0.0232591		-0.00228297		0.00986255		-0.00564839	-0.0345401	0.0178699	0.0574611
16.82	0.0564358	0.0320558	0.0851395		0.154012	0.0560379	0.028561		0.0622744	0.0132271	0.0509013	-0.0158085	-0.0720051	0.0137096	-0.0247663	0.00678623	0.0298103		-0.00712664		0.0686739		0.0217269	0.0151306	-0.033221	0.0114515
16.84	0.00211292	0.0698305	0.100741		0.141274	0.103389	0.0249711		0.0621858	0.0332789	0.0402909	0.00603201	-0.00867227	-0.0309538	-0.0598612	0.0365342	0.0553066		0.0425937		0.0974303		-0.0102913	-0.0242705	0.10318	0.0528419
16.86	-0.00145188	0.0464316	0.124203		0.106046	0.0471006	0.0101913		0.0619328	0.0199069	0.0611666	0.0282097	0.00367937	0.0549956	0.0202292	-0.0253483	0.038828		0.00291896		0.0635718		-0.0380401	0.00643869	0.00736291	0.0336924
16.88	0.0351972	0.0396367	0.0688982		0.114386	0.109852	0.000727918		0.0561492	0.0266754	0.0615594	0.0331048	-0.0525102	0.00895486	0.00617922	0.017589	0.0512689		-0.0120978		0.010399		-0.00118595	0.0173218	0.0627185	0.0289717
16.9	0.0625037	-0.00255387	0.0901925		0.22092	0.0333709	0.00153926		0.0595173	0.0350831	0.0387008	0.040939	-0.0888376	0.0317804	0.00857238	0.0562253	0.0456497		-0.0163858		0.0166035		0.0181727	-0.0273127	-0.0840149	0.00252916
16.92	0.0754412	-0.0420262	0.10228		0.0875771	-0.00594495	-0.0327562		0.0708136	0.0294986	0.0529309	0.012627	-0.0958887	-0.0543906	-0.0674617	0.162344	0.00885482		0.00162491		0.00167755		0.0114347	0.0143604	0.0145515	-0.035533
16.94	0.0856129	0.00232699	0.123437		0.187027	0.0658211	-0.0173397		0.0709846	0.0333845	0.0437459	-0.00609509	-0.0618065	0.0316845	0.0156265	-0.014809	0.0180365		9.16219e-05		-0.0196455		0.0252847	-0.0025758	0.0539003	-0.0111236
16.96	0.0450848	0.090101	0.0939582		0.0982733	-0.0488823	-0.0103107		0.0568961	0.0577592	0.0514525	-0.0523473	0.00300103	-0.00339448	-0.0556306	-0.0175729	0.0899812		-0.0303722		0.0254569		-0.0484781	-0.0294165	0.0389114	-0.00817978
16.98	0.0749086	0.0476303	0.0821824		0.109909	0.123146	0.0293761		0.0696207	0.0270715	0.0390758	-0.0737421	-0.0333489	0.0628107	-0.0119367	0.108258	-0.0176619		-0.038551		0.0441721		0.020901	-0.0533445	-0.0732848	0.0499956
17	0.0307234	0.029348	0.091217		0.080089	0.0972689	0.0482468		0.0512436	0.0215334	0.0288436	0.0171004	0.0176648	0.018362	0.0136182	0.148954	0.0258087		-0.00791931		0.072124		-0.000296639	0.00370871	0.0215613	0.00751969
17.02	0.0486322	-0.00819253	0.0995702		0.0894034	0.0429388	-0.0250999		0.0623432	0.0227045	0.0336709	0.058706	-0.0314582	0.00322861	0.0019734	0.0186016	0.0573757		0.00445371		0.0715641		-0.00073587	-0.00237445	0.0641031	-0.0136764
17.04	0.0276633	-0.0380247	0.079876		0.0910848	0.0442275	-0.0409972		0.0581479	0.019797	0.0392786	-0.0156235	-0.0169467	-0.0261301	-0.064221	-0.0530652	0.00094814		-0.00144448		0.047983		-0.0488543	0.0302845	0.0363141	0.0338856
17.06	0.0388826	-0.0158281	0.0614583		0.078907	0.0792483	0.0568315		0.072459	0.0265519	0.0348423	0.0297721	-0.054704	-0.0313015	0.022692	0.0311916	0.0058832		0.00213333		0.0648191		-0.0262062	-0.0575906	0.128348	0.00263934
17.08	0.0591262	0.043251	0.0924663		0.154008	0.0238426	-0.000704076		0.0536799	0.0397356	0.0478908	-0.00034059	-0.0721709	-0.00378778	0.00853343	0.0597604	-0.0304478		-0.0232511		0.0721002		-0.00592267	-0.0599709	0.0545363	0.0127591
17.1	0.0316989	0.0346	0.0666709		0.121848	0.00435848	0.0218703		0.0643806	0.0109526	0.0497441	0.037533	-0.0631632	-0.0147952	-0.0159057	0.0565616	-0.040925		0.0069978		0.0582426		0.0343953	-0.0568352	0.00145195	-0.0283723
17.12	0.0528659	0.0415243	0.0686135		0.0758136	0.0855361	-0.0142597		0.0500849	0.00966547	0.0686047	-0.00691267	-0.000294861	0.0335352	-0.0163297	0.0350852	-0.00923861		-0.017208		0.0493751		0.0457898	-0.023675	0.019	-0.0122991
17.14	0.079307	-0.00495764	0.0881021		0.154056	0.0135466	-0.0303907		0.0490247	0.0239052	0.0487145	0.00951487	-0.0743161	-0.0354648	-0.045192	0.0673376	0.0132556		-0.0234106		-0.00286074		-0.0256257	0.0119608	0.00147058	0.0611189
17.16	-0.0052962	0.0489077	0.0779038		0.105091	0.0238241	0.0319594		0.0686378	0.00925499	0.0561697	-0.0359224	0.0261034	-0.0221324	-0.0145623	0.0522786	0.0446117		-0.00616477		-0.0116552		-0.0259241	0.0197287	0.00264909	-0.0423487
17.18	0.0678886	0.0230068	0.0539347		0.111277	0.069012	0.00571639		0.0447112	0.0311985	0.037833	0.0161337	-0.0120585	0.0122802	-0.0123177	0.0257202	0.0339191		-0.0405224		0.103459		0.0234527	-0.0418597	0.00644778	0.0369199
17.2	0.0715458	0.000938899	0.0837513		0.0863957	0.171736	-0.0129365		0.0501802	0.0499725	0.0514242	0.0226168	0.0480245	0.0368122	-0.00954522	-0.0640867	0.0228106		-0.028601		0.0692359		0.0276263	-0.036452	-0.0402364	0.0157981
17.22	0.117086	-0.0365906	0.0927264		0.161047	0.0313742	-0.0109189		0.0768211	0.0414604	0.0669739	0.0105822	-0.074716	0.0624076	-0.0483156	0.120316	0.00159658		-0.0030471		0.0860468		0.00995178	0.0103559	0.0371404	-0.00395592
17.24	0.0315913	0.068222	0.070156		0.201312	0.00385745	0.00229429		0.0517805	0.0378845	0.0382232	-0.0289974	0.0738586	0.00492141	0.0210543	0.0734577	0.0533521		-0.0124671		0.0124247		-0.0410133	0.0674114	0.0132828	0.0295233
17.26	0.0292557	0.0249646	0.0909353		0.139195	-0.00122244	0.0212753		0.0586068	0.0227766	0.0444711	0.0176734	-0.00998532	-0.00725839	-0.053163	-0.0750517	0.0225963		-0.0122722		0.121927		0.0431242	-0.0234421	-0.0455405	0.0216007
17.28	0.0486857	0.0452424	0.0776855		0.0823606	-0.0550506	-0.0174129		0.0643678	0.0218976	0.0600136	-0.0140984	-0.021939	-0.0273074	0.00519052	0.00938833	-0.00824908		0.010005		-0.0273377		-0.0141443	0.0297327	-0.108927	-0.0069188
17.3	0.0673283	0.053568	0.089354		0.0832248	0.0327319	-0.0223749		0.0658275	0.0127024	0.0381375	-0.021127	-0.0384639	0.000669337	-0.0100363	-0.0544385	-0.00335165		0.00682515		0.0547272		0.0297925	-0.0193881	-0.0160597	0.0246621
17.32	0.00256582	0.0484576	0.136359		0.111694	0.0760334	-0.0302157		0.0654359	0.0129795	0.0478864	-0.0451734	-0.00030696	-0.0174755	-0.0122787	-0.0156613	0.0331958		0.0630343		0.0960958		-0.0117249	-0.0772754	0.0835596	0.0124804
17.34	0.0523808	0.0741567	0.0940891		0.0691698	0.00213667	0.0181341		0.0665839	0.0237577	0.0241089	-0.0356685	-0.0786309	-0.0386798	-0.0078005	0.152473	-0.00281857		-0.0249153		-0.0626617		-0.017507	-0.0061948	-0.0369634	-0.0423038
17.36	-0.00145688	0.0265016	0.0643861		0.251352	0.0659944	0.0128242		0.0693016	0.0231518	0.0259354	0.0119773	-0.0311852	0.0214882	-0.015336	0.151499	-0.0194432		0.0153734		0.0776506		0.0148893	0.0288002	0.0580439	-0.00266828
17.38	0.0136006	-0.00543253	0.0651237		0.13327	0.0550204	0.0321766		0.0578603	0.0220836	0.0652587	-0.0234731	-0.0458758	-0.020671	-0.0243939	0.0329462	-0.00332169		-0.0410663		0.0627354		-0.0233821	0.00745029	0.114718	-0.00126353
17.4	0.0647409	0.0349055	0.133268		0.114829	-0.0899518	0.0213004		0.0473104	0.0134014	0.0671504	0.0181247	-0.081418	0.00663135	-0.042408	-0.0570751	0.0238463		-0.0184512		0.0352224		-0.00450325	-0.0203717	0.0307656	0.0196539
17.42	0.0317842	0.0691927	0.0740681		0.212916	0.00396	0.0276922		0.0640929	0.0438921	0.041016	-0.00140986	0.0282115	-0.0273482	0.0440553	-0.01925	0.0410371		-0.0261773		0.0740757		0.0171444	0.0344582	0.0443223	0.0120217
17.44	0.016316	-0.0213655	0.0707548		0.0847195	-0.0104378	0.00943653		0.0528941	0.075889	0.0481764	0.042417	0.00448671	-0.0211234	-0.0323338	0.107086	-0.00820194		-0.0372363		-0.0200312		0.00257247	-0.0624243	0.0843792	0.0567098
17.46	0.027073	0.0188213	0.0754438		0.167577	0.0540313	-0.0316782		0.0512555	0.000936387	0.0591307	0.00509361	-0.0416013	0.00969345	-0.0568563	-0.044345	-0.0578652		-0.0388226		0.014744		-0.0295565	-0.0153776	-0.0732918	0.0237823
17.48	0.0511595	0.0615296	0.0879521		0.118229	0.0450072	0.00499547		0.0571387	0.0547267	0.0298017	-0.0279126	-0.0632296	-0.00370619	0.0269458	0.110869	-0.0565508		-0.0231162		-0.00631205		0.0225954	0.0483284	0.00798686	0.00386242
17.5	0.0303928	0.0390744	0.0822657		0.142094	0.045493	-0.0123162		0.0579186	0.0139348	0.0397331	0.0160997	-0.0193652	-0.0044931	-0.0208956	0.0514078	0.00185303		0.00534691		0.0210627		0.0292718	0.00472078	-0.0267245	0.00158775
17.52	0.0326122	0.0294947	0.0181979		0.227554	-0.00863067	0.00287695		0.0490095	0.027279	0.038986	0.0513031	-0.044048	-0.0161542	-0.00953579	0.0534261	0.0576297		0.00939092		0.0465967		0.0258655	-0.0447772	0.0303613	-0.0228319
17.54	0.0521137	-0.016508	0.131881		0.117331	-0.0462614	0.0349764		0.0613586	0.0266546	0.0572812	-0.0570716	-0.0474581	-0.0592053	0.00278154	0.0589583	0.0248636		-0.00489721		0.0207711		-0.00445476	-0.0198802	-0.0487973	0.0548624
17.56	0.0510368	0.0370916	0.0693449		0.10186	0.0438639	-0.0223344		0.0606316	0.0378771	0.0432534	0.00627476	-0.00679226	0.0294927	0.050196	-0.0380713	0.0279023		-0.0264684		0.0402174		-0.00149916	-0.0012136	0.00673685	0.064904
17.58	0.0562336	0.043245	0.116396		0.0484125	0.0262546	0.0334326		0.0475295	0.010379	0.0533822	0.0362544	-0.0135642	0.0296649	0.0057201	-0.0429536	0.0586105		-0.00740455		-0.0198291		-0.0434215	0.0130288	-0.00261339	0.0102733
17.6	0.00892853	-0.00638304	0.114051		0.0566835	0.0296485	0.0124394		0.0681617	0.0424147	0.0491979	-0.0130994	-0.0505409	-0.0153629	-0.0163068	-0.0366819	-0.00818299		-0.000767139		-0.0285732		-0.0277793	-0.00727796	-0.00736221	0.0297424
17.62	0.0910329	0.077643	0.0540503		0.209854	0.00612549	-0.0194317		0.0624638	0.0201879	0.0349619	-0.0288622	-0.0448567	-0.0236842	-0.0386025	-0.0459419	0.00756796		0.0140401		0.0555528		-0.0162736	0.0535397	0.00686128	-0.0365965
17.64	0.0414104	-0.00843363	0.0625063		0.135346	0.0269633	-0.0260748		0.0549641	0.00930595	0.0442483	0.0618685	-0.0372014	-0.0213151	-0.000669881	0.0110736	0.0131643		-0.0120371		-0.00134235		-0.0257888	-0.0640534	-0.0750298	0.0260871
17.66	-0.0108832	-0.000620341	0.0790967		0.131543	0.00381559	0.0382534		0.0407712	0.0115076	0.0264043	-0.00152185	-0.0574962	0.0147956	-0.0333202	0.0571077	0.0419705		0.0194235		0.0593199		-0.0345377	0.0379545	-0.0569869	-0.0184069
17.68	0.0346152	-0.00431685	0.0959517		0.171869	-0.0991261	0.00135878		0.0556896	0.00957553	0.0465104	0.0833576	-0.0548967	-0.00881735	-0.0400135	0.0483611	0.057436		-0.0290318		0.013704		0.0219579	0.0580499	0.0287995	-0.0183911
17.7	0.0466188	0.0243888	0.0709478		0.110198	0.0928112	0.0440943		0.0586178	0.0342163	0.0822583	-0.0171962	-0.0669735	0.0010326	0.0242599	-0.0239086	0.0348884		0.042229		0.0453376		-0.0200445	0.0189534	0.0950393	0.00736843
17.72	0.0192332	0.0140078	0.107616		0.112162	-0.110498	0.00401204		0.0511493	0.0310364	0.0444944	0.104591	0.00300087	-0.0110518	-0.0210839	0.0510467	0.00107986		0.0234148		0.024072		0.000525467	0.00909076	0.0409569	0.0430682
17.74	0.0291917	-0.0251927	0.050202		0.0488496	-0.0474348	-0.0152391		0.0724965	0.0339234	0.0759682	0.0078235	-0.0282269	0.0476204	0.0208193	-0.0767402	-0.0308903		-0.0341652		0.0296351		-0.0223412	0.0200167	0.0508976	0.0174116
17.76	-0.00293371	0.0252869	0.0835598		0.0789721	0.0773938	0.0134598		0.0660243	0.0649365	0.0529743	-0.000661294	-0.0574571	0.0043769	-0.0353966	-0.00942226	0.0360958		0.00666839		0.00128501		-0.0244365	0.0278581	0.0361771	0.0372538
17.78	0.0234439	0.072845	0.0803712		0.147541	0.0241698	-0.00686145		0.0722404	0.0151418	0.0559493	-0.0348637	0.0193328	-0.0138227	0.0417873	0.0416578	0.0260246		-0.0268283		0.0455884		-0.0409207	-0.0165775	-0.0857703	-0.0404217
17.8	0.062575	0.0674423	0.0651887		0.136416	-0.0123239	-0.0395186		0.0553431	0.0611713	0.0528518	0.0083998	-0.0178112	-0.0291693	-0.019065	0.0262494	0.0663849		0.0280407		0.0234494		-0.0412286	0.0378054	0.0516172	0.0734643
17.82	0.0272425	0.0503065	0.0616929		0.11574	-0.0343564	-0.0147342		0.0665671	0.0178241	0.0176456	-0.00778847	-0.103888	-0.0264353	0.019236	0.0135945	0.0520823		0.0086321		0.0453402		-0.0252962	-0.00917337	0.00174375	0.00283441
17.84	0.0360979	0.0103448	0.0490799		0.154036	0.0417857	-0.00585743		0.0621835	0.0413357	0.0588342	0.0508905	0.0116402	-0.0284046	0.0174685	-0.0421352	-0.0238978		-0.0341421		0.0772224		0.0714343	0.0177093	-0.0589425	-0.0670795
17.86	0.0377657	0.0751915	0.0711615		0.135162	0.0031716	-0.00875672		0.0659817	0.0390979	0.0670543	-0.00316706	-0.0137931	0.033438	-0.0199176	0.189851	0.0796172		0.02394		-0.0411532		0.0278895	0.00938172	0.0204811	0.0105194
17.88	0.0278014	0.00791946	0.122657		0.0694568	-0.00628917	0.0288756		0.0708589	0.0424381	0.0604823	0.0343277	0.0506147	0.00652178	0.0154057	-0.0504444	0.0542835		-0.0237798		0.0578393		-0.0385602	-0.0121504	0.0122311	0.0244369
17.9	0.0293181	-0.0157891	0.0678691		0.0204512	0.0161189	-0.0217641		0.07036	0.0187607	0.0571333	-0.0354016	-0.11746	-0.0305784	-0.0188002	0.0868413	-0.0209416		-0.0300463		0.0826863		0.0323014	-0.0172946	0.0318006	-0.0285039
17.92	0.0273186	0.017026	0.0642334		0.147769	0.0544841	-0.0264626		0.0594569	0.0400755	0.0417649	-0.017026	0.0221093	-0.0150699	-0.0295589	0.0315704	-0.0293319		-0.00200924		0.0197438		-0.0282719	0.0223248	-0.0257886	0.0356364
17.94	-0.0190102	0.0760867	0.0471267		0.125577	0.113736	0.0670474		0.0619722	0.0249465	0.0397401	0.00998442	-0.0356613	0.0174559	0.0198481	0.00741278	-0.0663961		-0.0339787		0.0965958		0.0308762	-0.000837512	0.0221612	0.0066739
17.96	0.0105446	0.073425	0.104688		0.113202	0.0416516	0.036476		0.0560813	0.000287516	0.0462656	0.0677963	-0.0357829	-0.00855051	0.000941004	0.105595	-0.00606107		0.0370596		0.0495335		0.00616772	-0.00346262	-0.0599233	-0.00723697
17.98	0.0503701	0.0132921	0.0729187		0.0743455	0.016782	0.026702		0.0564453	0.0572402	0.0268321	0.0619216	0.00101517	0.00651963	-0.0424534	0.112169	-0.0115146		-0.00216636		0.0549273		-0.0692726	-0.0648941	0.0515494	0.02923
18	0.00521975	0.0693124	0.0463599		0.100261	0.0319017	0.0787601		0.0650961	0.0480576	0.0704173	-0.0314847	-0.00112321	0.0218317	-0.0314307	0.10428	0.0642109		-0.0362729		0.040788		-0.0315048	0.0665021	0.0458036	0.0090707
18.02	0.0524836	0.00791976	0.0484252		0.142802	-0.000276809	-0.0429331		0.0516472	0.0201996	0.0298817	-0.00383508	0.0585542	-0.0227097	0.0151718	0.0422761	-0.0628831		-0.00303116		0.00559829		0.00584981	-0.0716679	0.0294696	-0.0135652
18.04	0.057568	0.0162549	0.0844961		0.145942	0.0968188	0.0240777		0.0636136	0.0131759	0.0398504	-0.0685189	-0.0306195	0.0370037	-0.0407827	-0.0169056	0.030359		-0.0258089		0.0589504		-0.0341027	0.0126489	0.0315248	0.0340814
18.06	0.0693267	0.0274772	0.0611743		0.0957739	-0.0163331	0.00894552		0.0461053	0.0308054	0.0450872	0.0325967	0.0219584	-0.0251041	0.0276822	0.0368721	0.022475		-0.0252146		0.0122749		-0.0136926	-0.0387864	0.0790874	0.00451721
18.08	0.0735713	0.00576178	0.0727845		0.259214	-0.0538328	-0.00428059		0.062764	0.0360265	0.0584346	0.0119902	-0.114162	0.00655154	-0.0238248	-0.0167147	0.0550071		-0.0152789		-0.0499733		-0.0214351	-0.068372	-0.0162918	-0.0486886
18.1	0.0186843	0.0177822	0.0486309		0.109217	-0.0489348	0.0405986		0.0717617	0.053981	0.00707532	-0.0179641	-0.0532424	-0.010881	-0.0147531	0.0690352	0.0209027		-0.00546146		0.0633263		-0.0514694	0.00345221	-0.0293343	-0.00655451
18.12	-0.00529463	0.111088	0.088012		0.0860032	0.184139	0.0578148		0.055429	0.0160661	0.0483752	0.098982	-0.0844999	-0.00285945	-0.0516309	-0.0427018	-0.0100118		-0.0128799		0.00419938		0.0289207	0.0309894	0.0708947	-0.0385537
18.14	0.0166801	0.0709434	0.114378		0.184395	0.0167127	-0.00343342		0.0698279	0.0405309	0.0606014	0.00927088	-0.026717	0.0143573	-0.00390418	0.0341703	-0.0360365		-0.0263904		0.0800176		-0.01631	0.00902546	-0.113852	0.0216132
18.16	0.0725747	-0.0304687	0.0816694		0.214425	0.11848	-0.0403661		0.0505018	0.076134	0.0309921	-0.0312675	-0.00937237	-0.0398029	0.00134256	0.118784	0.0337675		0.012266		0.0249318		-0.0212299	-0.00331996	0.00562376	-0.0347317
18.18	0.0601531	0.0612523	0.08045		0.176192	0.129859	-0.00800828		0.0669692	0.0182284	0.049668	0.040502	-0.0851721	0.025033	-0.00586417	-0.0198907	-0.00591816		-0.0202931		0.0294213		-0.0163487	0.0546599	-0.00312613	-0.0363485
18.2	0.0219661	0.0147526	0.125691		0.103822	0.0209251	0.00400358		0.0724195	0.041257	0.0453226	-0.00470713	0.0117091	-0.012359	0.0429182	0.0811798	0.000229203		-0.00469846		0.0176112		0.0553698	0.0395285	0.00156162	0.053901
18.22	0.0479185	0.0667412	0.0684605		0.134528	0.0167894	0.0289507		0.0819526	0.0219087	0.0443061	0.015795	-0.0245551	-0.00354672	-0.0156021	-0.00140326	-0.00557686		0.0303431		0.0463343		-0.0102441	-0.00454394	0.0362904	-0.00680366
18.24	0.0669326	0.00712416	0.0941575		0.208699	0.0784547	0.0111012		0.0599403	-0.012568	0.0384601	0.00474314	-0.0791368	-0.0299053	-0.0218374	0.101382	0.0822567		-0.0211746		0.0603282		0.0645904	0.00272604	0.0169962	0.00400979
18.26	0.0648034	0.0438882	0.0657951		0.117081	-8.24465e-05	0.0295143		0.0644287	0.0523815	0.056724	-0.00836747	0.00512429	0.00521164	0.00339628	0.0130902	0.0551127		-0.0013086		0.038461		-0.0830034	0.0212545	0.040256	0.0304607
18.28	0.0424069	0.0330965	0.0831339		0.103982	0.0252254	-0.0102943		0.0479702	0.0045253	0.038199	-0.0221122	-0.0571521	-0.0051582	0.00130656	-0.0109831	0.0266681		-0.0120815		0.0633364		0.00219497	-0.0373226	-0.0772466	0.00384818
18.3	0.00116004	0.057738	0.074733		0.134851	0.0866881	0.0151694		0.0527853	0.0296568	0.0524518	-0.00175415	-0.0366594	-0.0375345	-0.0118824	0.0479648	0.0212937		-0.0093878		0.0329744		-0.0412529	-0.0213825	-0.0478151	-0.00765333
18.32	0.0367216	0.0557552	0.0852231		0.109905	-0.029065	-0.014113		0.0517224	0.0157929	0.0289684	0.0331423	0.0381883	-0.0214537	-0.0159037	-0.00910369	0.0470465		-0.00225403		0.0358565		-0.0139821	-0.00684198	-0.082901	-0.0314702
18.34	0.0454837	0.0676327	0.07138		0.0735582	0.0312197	-0.0225888		0.0764506	0.000999151	0.0512424	-0.0409247	-0.064535	0.0090974	0.00101855	0.104299	0.0567438		-0.0197867		0.0759242		-0.00461365	-0.0134992	0.00383219	0.00195159
18.36	0.0592828	-0.00532893	0.0529374		0.127884	0.0371302	-0.0233058		0.0511393	0.0261897	0.0414238	-0.0261152	0.0472768	-0.0123522	-0.00327782	0.0204522	0.0622642		-0.017935		0.109547		0.00942997	0.0395228	-0.0849482	-0.0342772
18.38	0.0118607	0.00125757	0.0470722		0.15439	0.162813	0.0249803		0.0417338	0.0263053	0.0435379	-0.00809125	0.0210741	-0.0482028	-0.0105121	0.0767588	0.0972402		-0.0062564		0.0203951		-0.00645282	-0.0421582	-0.00307046	0.0139755
18.4	0.0632236	0.0551459	0.0768727		0.155182	0.0474706	-0.0118393		0.0698511	0.0158998	0.0617165	0.00761134	-0.0314506	-0.0171767	-0.0391996	-0.000208103	-0.0239272		-0.0184635		0.0150485		0.0513289	0.0335569	0.0250039	-0.0454768
18.42	0.0439944	0.0707194	0.0810371		0.0418381	0.0181055	0.0151903		0.0633744	0.0208084	0.031762	-0.0703813	-0.000680715	-0.00314333	-0.00363166	0.112638	0.0825125		-0.0128298		0.121029		-0.0162953	-0.0131724	0.0421737	0.00265278
18.44	0.0420725	0.00170766	0.0825556		0.0593049	0.0454447	-0.0133495		0.0679253	0.00745053	0.0108822	0.00873195	0.0167719	-0.02546	-0.0251492	0.0392946	0.109727		-0.00546157		0.0255393		0.00625827	0.0189324	0.0146906	-0.0505384
18.46	0.05737	-0.0462815	0.0931964		0.221018	0.02884	-0.0348026		0.0679476	0.00688084	0.0549476	-0.0277672	0.0117457	-0.00430899	-0.0057891	-0.010793	0.0836078		-0.0160615		0.0829994		-0.00458454	0.0421733	0.0654647	0.0153645
18.48	0.0558641	0.0543271	0.0986294		0.147806	-0.0134908	-0.0142585		0.041502	0.0226851	0.0288461	-0.0163942	-0.0192215	0.00383315	-0.0164438	-0.0391838	0.0495747		0.0347819		0.0587369		-0.0136619	0.0226767	-0.0125663	-0.0288514
18.5	-0.00620746	-0.000353306	0.0589614		0.0629563	-0.0489913	0.0212736		0.0656408	0.0317145	0.0383226	-0.0140095	0.0143888	-0.00895007	-0.0362834	-0.00903716	0.109745		-0.031131		0.0840553		-0.00937269	-0.0128964	-0.0464577	-0.00237016
18.52	0.0505085	0.0173	0.0729607		0.163045	0.028443	0.00168048		0.0676054	0.0486693	0.0283237	0.0553023	0.00251939	-0.0494544	-0.0227641	0.198367	0.0698493		0.020014		0.0433034		-0.0173507	-0.0175924	-0.0147758	-0.0523667
18.54	0.0343316	-0.0350776	0.072035		0.0720561	0.103749	-0.00155427		0.0570755	0.0273381	0.0470032	-0.0104194	0.0108359	-0.0177233	-0.0305508	0.0750512	0.0375511		-0.00275317		0.0388931		-0.0224488	0.00633264	0.113238	-0.00948691
18.56	0.0343193	-0.0356812	0.077708		0.160804	0.0263986	-0.0117894		0.0478469	0.000940105	0.00770626	-0.00952951	-0.00201088	0.00849709	0.0200967	0.164345	0.019866		0.0138847		0.0526289		-0.0311277	0.0102177	-0.021119	-0.00982499
18.58	0.0239496	0.015759	0.0882962		0.122061	0.107816	0.0352221		0.0784026	0.0253342	0.0612454	0.042361	0.0161437	-0.0150057	0.0203419	-0.0847749	0.0601012		0.00920901		0.00344602		0.0174464	-0.0107934	0.0799776	-0.0924133
18.6	0.0516814	0.00131242	0.0955182		0.109454	0.0104158	-0.0149506		0.0614437	0.0301209	0.0354733	-0.00587581	-0.0102826	-0.0101752	0.00521718	0.176225	0.0309516		-0.0522851		0.0950594		-0.0597656	-0.0344546	0.0489563	0.0434076
18.62	0.0770059	0.0209174	0.0547799		0.0354101	0.0148827	0.0057005		0.0676051	0.0572507	-0.00139781	-0.0357455	0.000229602	-0.0294423	-0.00699422	0.159457	0.00250483		0.00684263		0.0914252		-0.0110615	-0.0158144	0.0987511	-0.00686193
18.64	0.0513858	0.0265611	0.0659449		0.127981	0.0371089	0.0177381		0.0632225	0.0548043	0.0404306	-0.0332625	0.0208601	0.00651017	-0.0115486	-0.0429972	0.0172293		-0.0249334		0.028593		0.00190987	-0.0253188	-0.103745	-0.00360889
18.66	0.0153872	0.0200938	0.0802298		0.144222	-0.0367542	-0.0250578		0.0611461	0.0392353	0.0244727	-0.0275399	-0.00899468	-0.013798	-0.0362245	0.117638	-0.00398629		-0.0452061		0.114485		0.000234349	-0.00153547	0.0155039	-0.0154237
18.68	0.041202	0.0400684	0.0789873		0.155082	0.0712065	0.00797246		0.0664733	0.0436537		-0.0202692	0.00010895	-0.0172075	-0.0351897	-0.0441635	-0.0159239		0.0154825		0.00191405		-0.023439	0.0728169	0.0390786	-0.0227489
18.7	-0.0168241	0.00724178	0.0859942		0.120065	0.0367581	-0.0127969		0.0554912	0.0394195		0.0453526	-0.0538964	0.0228535	-0.000550945	-0.0720168	0.0302121		0.0325323		0.0613933		-0.0250606	-0.0639746	0.0463171	0.00306299
18.72	0.0430784	-0.0263392	0.107883		0.1252	0.0152154	0.0105088		0.040995	0.0401765	0.0066428	0.0154577	-0.0873901	-0.0503842	0.0280893	0.0191886	0.0377595		-0.0456082		0.0296272		0.0128144	0.0426458	0.0639867	-0.0544201
18.74	0.0420748	0.0831649	0.0644667		0.160808	0.011906	-0.0105221		0.0523688	0.025324	0.0406475	0.0452286	-0.0686424	-0.034635	0.0274736	0.0422677	-0.015224		0.0224969		0.00909505		-0.00894259	0.0439608	0.0981315	-0.00528085
18.76	0.0149147	0.0500632	0.0577763		0.105827	0.0128737	-0.0153432		0.0689596	0.0615066	0.0372003	-0.017588	0.0104757	0.0422734	-0.00369796	-0.0761451	0.0120006		0.0611605		0.0781785		0.00845861	-0.015504	-0.0854781	0.00639948
18.78	0.0531795	0.0816848	0.0781622		0.1725	0.0621515	0.0151943		0.0624146	-0.015536	0.0221456	-0.0502969	-0.0820686	-0.0330406	-0.0275965	0.0055197	-0.0623493		-0.0181924		0.0663894		0.0316929	-0.0430053	-0.0612081	0.00401608
18.8	0.00694116	0.0548785	0.0620065		0.0697778	0.017809	0.0219452		0.0562502	0.00694995	0.046367	0.0404954	-0.120709	-0.0210488	-0.00661002	0.0161039	0.0354905		0.000671279		0.0698438		-0.0828012	-0.0839473	-0.0588837	-0.0433029
18.82	0.0348948	-0.020034	0.081942		0.141963	0.0281133	0.0103192		0.0659107	0.0251647	0.0534748	-0.0164175	0.0252964	0.0327141	-0.0166381	0.0367402	0.058545		-0.00573599		0.0200468		0.00598919	-0.00206402	0.0246718	-0.00178004
18.84	-0.0199562	-0.0349894	0.0789545		0.129264	-0.0496541	-0.0312657		0.0538637	0.00455588	0.062621	0.0325172	-0.0157855	-0.00394484	-0.0136527	0.0158237	0.0367204		-0.0160637		0.0726616		-0.0289083	0.00303121	0.0492989	0.000631552
18.86	0.0525187	0.00815239	0.0611926		0.112825	0.0358562	0.0366791		0.0819756	-0.00823385	0.0528697	0.0975376	-0.0152569	-0.00024994	0.0204351	0.0387499	0.012097		0.0127047		0.0657077		-0.0232306	-0.0452885	-0.0117389	0.0270136
18.88	0.0282986	0.0176178	0.123866		0.1258	-0.0937994	0.0105007		0.0692075	0.0340563	0.0293757	0.0376135	-0.0578557	-0.0160802	-0.0045529	0.17151	0.0607166		-0.00982205		0.026405		-0.00725071	0.00385097	-0.0500539	-0.0150555
18.9	0.0495956	0.0247675	0.0608612		0.119511	-0.0650713	0.00427782		0.0470064	0.0324772	0.0460396	-0.00766619	0.0436088	-0.0301511	-0.049166	0.0630919	0.0634426		-0.0226294		0.00511182		-0.0210087	-0.0192928	-0.0292824	0.0395396
18.92	0.0179613	0.0235669	0.0571899		0.118332	0.0359393	0.047876		0.0672884	0.021057	0.0785477	0.00181677	0.0329298	-0.0257959	0.0120925	0.0288392	0.0387721		0.00668211		-0.000848306		-0.0169932	-0.0134301	0.0894138	0.0117168
18.94	0.0559179	0.00222836	0.0349271		0.095021	-0.00866658	-0.0372271		0.051783	0.0377188	0.0307012	-0.0112802	0.0464942	-0.00171882	-0.024409	-0.0250882	0.0647942		-0.013804		0.0852309		0.0171434	-0.0157549	-0.0322961	-0.0319968
18.96	0.0501552	0.0474123	0.0930612		0.179897	0.0399027	0.00501315		0.0617767	0.0383136	0.0476163	0.0589944	-0.114054	-0.0142902	-0.0588301	0.0880683	0.0258573		-0.0178418		0.0726101		-0.00147885	-0.062282	0.0203417	-0.02114
18.98	0.00434084	-0.0285405	0.0405628		0.117632	0.0420426	-0.0281353		0.0605339	-0.0142243	0.038293	0.00105016	0.0123712	-0.00948493	0.0138909	0.0415837	-0.0442341		0.00282076		0.0805995		-0.0101056	-0.0368219	0.108433	0.018094
19	0.0644011	0.0238687	0.0669281		0.145925	-0.0374859	0.0082066		0.0684968	0.0385653	0.0566556	0.00484931	0.000101042	9.98605e-05	-0.0169228	-0.0840499	0.011373		-0.017503		0.0729212		-0.00393475	0.000762768	-0.0536056	0.0795603
19.02	0.0391887	0.0682316	0.0868022		0.143062	0.047258	-0.0375069		0.0618239	0.0269261	0.0525368	-0.00725645	0.0354129	0.0171826	-0.00283553	-0.0164297	0.0770407		-0.00985968		0.125999		-0.0375184	-0.0350937	0.0104846	-0.0879445
19.04	0.0465609	0.0103889	0.0989144		0.182793	-0.0111862	0.0455369		0.0642477	0.075301	0.0328332	-0.00974968	0.0221986	0.00266739	-0.0408659	0.0187153	0.0274415		-0.0354017		0.100968		-0.0166823	-0.0231156	-0.0433439	-0.00098978
19.06	0.0383297	0.0473441	0.118047		0.135278	0.0121979	0.0433736		0.0533417	0.00837153	0.0577806	-0.0259869	0.0139303	-0.0261333	-0.0565	0.118197	-0.0102679		-0.0515983		0.0778661		-0.0120828	-0.0253335	0.0190107	0.0142671
19.08	0.0786997	0.053757	0.115823		0.0690272	-0.0208514	0.0281892		0.0669843	0.00141106	0.0335326	0.0230448	0.00215899	0.00399752	-0.0204722	0.0250714	0.0327743		0.0227853		0.0431139		-0.0062596	0.0221057	0.0954332	0.0253389
19.1	0.0157332	-0.000625663	0.084704		0.085266	0.0298845	-0.0566003		0.0498556	0.0215704	0.047577	-0.00567843	0.00105693	0.0221808	-0.0185674	-0.00706923	0.0177436		-0.0330777		0.0294682		-0.000791325	0.027317	-0.0240584	-0.0515874
19.12	0.050036	0.035449	0.0293889		0.0863042	-0.015394	0.0204089		0.0529325	-0.00407523	0.0360656	0.044186	0.0175022	-0.0166692	-0.00898637	-0.0269633	0.039692		-0.0471754		0.0754184		-0.00536259	-0.0435799	-0.067469	0.0438233
19.14	0.0338872	-0.0301992	0.0672646		0.0886336	0.0104817	-0.0533061		0.049105	-0.013509	0.0396067	0.012774	-0.0155164	0.00492659	0.0311111	-0.067033	0.0180046		0.00111426		0.0474147		-0.0162564	-0.0485436	-0.0238	0.0341456
19.16	0.0477892	-0.0245285	0.0599285		0.123737	0.020382	0.00233352		0.0681954	0.0224519	0.0466225	0.0569882	0.00751689	-0.0141809	-0.00971833	-0.00493637	-0.0718102		-0.0482716		0.0131569		0.00963148	-0.00536314	0.0344363	0.0248839
19.18	0.0375412	0.0370919	0.0747817		0.206354	0.0650635	0.0593894		0.0532718	0.018481	0.0307921	0.00289834	-0.0574352	0.0270324	0.0229264	-0.102247	0.0397021		-0.0206213		-0.0161248		-0.0054676	0.00127959	0.021026	0.0140151
19.2	0.00714874	0.0346979	0.0623581		0.134534	0.019891	-0.023425		0.0613583	0.0323134	0.0214179	-0.0239243	0.00564104	-0.0398365	0.000219288	0.0893247	0.0785719		0.0170457		0.0324149			-0.0329387	-0.0963844	0.0380463
19.22	0.0222878	0.0654361	0.0850074		0.14971	0.0641001	-0.0113636		0.0743861	0.0158883	0.0510614	0.0224089	0.0199949	0.0373046	-0.0622484	0.0127979	0.00716424		-0.0359695		0.0600344		0.0306051	-0.0584215	-0.060894	0.035602
19.24	0.0755407	0.0406734	0.08221		0.0682007	0.0699411	-0.0122398		0.0613105	0.0319481	0.0115492	0.00104261	0.0177968	0.000125368	-0.0388715	0.0126805	0.0311499		-0.0218509		0.0661597		-0.0232088	0.00302505	-0.0312947	0.0153595
19.26	0.00528501	0.0562284	0.0946604		0.164484	-0.0523669	-0.0134266		0.0650729	0.00881577	0.027587	-0.0178705	-0.0352231	0.0139361	0.0247989	0.0265405	0.0330149		-0.0351355		0.0354366		0.00837969	-0.0159175	0.0372925	-0.015394
19.28	0.0350827	0.0870861	0.0802938		0.0577268	0.00172487	-0.0452902		0.07226	0.0100962	0.0554834	-0.0179012	0.0246038	0.0351429	0.0105198	-0.0497295	0.0371309		-0.0261589		0.0911966		-0.00923637	-0.0470557	0.0725081	0.0158345
19.3	0.0427095	-0.0155509	0.0772325		0.0718536	0.0529899	0.0459372		0.0512993	0.000543939	0.0244777	-0.0220138	0.0383037	-0.00617894	-0.0554463		0.0274043		-0.0330801		0.0398357		-0.0273215	-0.0379708	0.0975727	0.0176509
19.32	0.0655594	0.0426218	0.133108		0.180122	0.0305087	0.0262664		0.0431733	0.0111006	0.0593844	0.0412826	0.00668606	0.0156751	-0.00868577		0.0228599		-0.00852843		0.00122334		-0.0365728	-0.0579516	0.0380205	-0.000130001
19.34	0.0316887	0.0264166	0.048934		0.109342	-0.00996593	-0.00149339		0.0592952	0.032857	0.0439632	0.079035	0.000237223	-0.0169607	0.00305935		0.0326652		-0.0580791		0.0607368		-0.0275759	-0.076343	0.019989	0.0154852
19.36	0.0303774	-0.0278532	0.0613246		0.215965	-0.0040285	0.0312632		0.0538353	0.0474907	0.0299947	-0.0193971	-0.0247423	0.0129753	-0.0186223		0.0497654		-0.0106008		0.0420279		0.0154175	-0.0525842	-0.0460874	0.017484
19.38	0.0706734	-0.0171739	0.0922328		0.0608516	-0.0123805	0.00854565		0.0560327	0.0166318	0.0258784	0.0163386	-0.0130748	-0.00209019	0.0261925		0.00406339		-0.0666734		0.0422153		-0.0673808	-0.0535812	-0.0346489	-0.0142538
19.4	0.0051056	0.0386082	0.102699		0.121034	0.00924663	-0.0593928		0.0490704	0.0462517	0.0385104	-0.0013626	-0.0270525	0.0102613	-0.00835644		-0.0422181		-0.00868417		0.117175		-0.0332668	-0.0520238	0.0937743	0.0025811
19.42	0.00861981	-0.00554462	0.0700449		0.168095	0.0148434	-0.0191045		0.0532925	0.0216259	0.0455333	0.00677117	0.0105033	0.00549805	-0.00414724		-0.0280426		0.00572307		0.0270926		-0.00356055	-0.0482578	0.0330395	0.0346769
19.44	0.0035821	0.0359475	0.0670657		0.128009	0.0061317	-0.0206458		0.0575186	0.0300802	0.0560582	0.0143332	0.0296682	-0.0397243	-0.00053304		0.0439037		-0.00839384		0.0309895		0.0422395	-0.0253995	-0.046302	0.0281708
19.46	0.0427654	0.041455	0.0626942		0.132548	0.0765899	-0.0269489		0.0647754	0.0351803	0.0460859	0.0155804	-0.0292128	-0.0206215	-0.00148248		0.0603449		0.0171661		0.104517		-0.0226651	-0.00365354	0.00463982	-0.0475338
19.48	0.0407034	-0.0241493	0.0455628		0.0681397	0.108875	-0.0163956		0.0665835	0.0377054	0.0233271	-0.0207378	0.0218567	-0.0125285	-0.0483893		0.0294319		-0.0498936		-0.00160694		-0.0152535	0.023133	-0.045878	-0.0166826
19.5	0.0253326	0.0379991	0.0697229		0.0610466	0.00886797	-0.0224525		0.0751154	0.0184417	0.0418345	-0.0658912	0.0614217	-0.00753594	-0.0168225		0.00552203		-0.0184344		-0.00205813		-0.0269996	0.0392481	0.0448704	0.0404808
19.52	0.0397733	0.0251329	0.0900309		0.175888	0.184395	0.000930528		0.0483656	0.0606523	0.0615687	-0.0144543	0.00124101	0.00371391	-0.00908188		0.04441		0.00247875		-0.00740971		0.00475512	0.025585	0.0720356	0.00412699
19.54	0.045112	-0.0333301	0.0495007		0.0400661	4.13404e-05	-0.00727764		0.0726825	0.0220037	0.0264693	0.103928	-0.0602314	-0.0183998	0.0004905		-0.0225071		-0.0345272		0.0217833		-0.00264932	-0.00736313	0.0672618	0.0338474
19.56	0.0555654	-0.0150399	0.0774633		0.084037	-0.0340979	0.000283437		0.0510364	0.0198313	0.0450173	-0.0132267	0.000561747	-0.0379291	-0.0112112		-0.0144515		0.00633981		-0.0129131		0.0355401	0.0559555	0.0737997	0.00560688
19.58	0.0741572	0.0824307	0.076811		0.13305	0.0219672	-0.0215663		0.0462214	0.00938099	0.063346	0.0394466	-0.0469362	0.0154705	-0.0197801		-0.0163389		-0.0149537		0.0357034		-0.0294024	-0.0121881	-0.000533437	0.00724634
19.6	0.0337212	0.0110945	0.0349468		0.0833697	0.00936877	-0.0174184		0.0423518	-0.0123664	0.0314225	-0.0197957	-0.00746895	-0.029515	-0.00856615		-0.0293921		-0.0566663		0.103206		-0.00290791	-0.0350579	-0.0517803	-0.027251
19.62	0.0368651	0.0546547	0.0395096		0.170045	0.0330485	0.0218268		0.0589601	0.0399979	0.0412943	0.0260755	-0.0123692	0.0303505	0.0194742		-0.0374722		-0.0383228		0.0251183		-0.00934946	-0.0421402	0.14015	0.0475701
19.64	0.0374632	0.0166769	0.0585603		0.136921	0.0500643	0.058528		0.058505	0.0560327	0.0220792	0.00126041	0.0456488	0.00161206	-0.00623822		0.0231495		-0.00381262		0.0207352		-0.00583999	-0.0498227	0.04868	-0.0654378
19.66	0.031335	0.0292335	0.0731884		0.148257	0.0541812	-0.0312463		0.0539077	0.0100121	0.0470316	0.0676534	-0.0122325	-0.0175878	-0.0559545		0.0307751		-0.074147		0.0156293		0.0138002	-0.000137352	-0.0284615	-0.0181959
19.68	0.0474416	0.0106985	0.0673361		0.0605143	-0.0382366	0.010715		0.0562786	0.0204748	0.0429319	0.00365313	-0.00229668	-0.00589099	-0.0668684		-0.00749112		-0.00208686		0.0571411		-0.0268613	-0.00683374	-0.0538146	0.0276043
19.7	0.0317101	0.0939196	0.0581879		0.111536	-0.00748432	0.0164966		0.0634382	0.0458394	0.0388768	0.025457	0.0334697	-0.00577336	0.00961868		0.0322252		-0.0192873		0.0487001		0.0586353	-0.0219665	0.0274103	-0.0356472
19.72	0.0580904	-0.0225236	0.064774		0.0523871	0.0238888	0.0171563		0.0543935	0.0110763	0.0482053	-0.00657241	-0.0803843	0.00777015	-0.0190303		0.00650337		-0.043272		0.00442983		-0.00615	-0.0297421	0.0356487	-0.0259911
19.74	0.0809014	-0.0227174	0.0630986		0.142496	0.00866493	0.0190212		0.041224	0.0349636	0.0349489	0.022426	-0.0423581	7.05042e-05	0.00406658		-0.0285228		-0.0200217		0.11017		-0.0139525	0.0457817	-0.00223228	-0.0205896
19.76	0.0606804	-0.0134393	0.0804585		0.0666616	0.13277	-0.00945028		0.0392642	0.0312159	0.0407116	0.0308895	0.0315174	0.0150757	-0.0324529		0.0776526		0.00816849		0.0319162		0.0225942	-0.0105472	0.0196111	0.0192313
19.78	0.0205581	0.00445559	0.0891054		0.223203	-0.0436584	0.0259538		0.0604301	0.00228399	0.040655	0.0262528	-0.00907614	-0.0315658	-0.0487837		0.0394736		-0.0432212		0.00635		-0.000595951	-0.0138174	-0.0291721	0.019572
19.8	0.0173689	0.0529326	0.0574953		0.112839	0.0213061	0.0299243		0.0276793	0.0214387	0.020475	-0.016272	-0.0162637	-0.0302358	-0.0272051		-0.0262963		0.00889461		0.0106289		0.00961308	0.0109148	0.00526135	0.0666351
19.82	-0.0148089	0.0622011	0.0722668		0.184097	-0.0418097	-0.0481278		0.0806529	0.0239186	0.0352206	0.0241681	0.0395686	0.0041275	-0.0622132		-0.100072		-0.00918957		0.0869387		-0.0172508	-0.0489477	-0.0837327	-0.0117277
19.84	0.0568179	0.014869	0.0414041		0.177403	0.143561	-0.0359801		0.032079	0.0305103	0.0515281	-4.57579e-06	-0.0362322	-0.0129355	0.00547714		0.0365437		-0.00333185		0.0236114		0.0476956	0.0625622	-0.0391507	0.0138151
19.86	0.0513195	0.0637715	0.0614701		0.0917663	0.0586473	-0.012251		0.0439716	0.0516282	0.0346191	-0.0400836	0.0317766	-0.0160394	0.00319156		0.058054		-0.0529033		0.082711		0.0214094	-0.0674076	-0.0750666	-0.0202191
19.88	0.0374783	0.0366146	0.0731735		0.137778	-0.0286316	-0.0287429		0.0374729	-0.0019843	0.0411443	-0.00969209	0.024846	-0.0172806	-0.0618574		0.0108557		-0.0390073		-0.0329301		0.014848	-0.0232171	-0.0266656	0.0109977
19.9	0.0267836	0.0592796	0.0598747		0.124838	0.0761226	-0.0126443		0.0395194	0.0331804	0.0428113	0.00544774	-0.0194789	0.0362059	-0.0374103		0.0443596		-0.0135132		0.0713968		0.00736437	0.0223282	0.105532	0.0139306
19.92	0.0386119	-0.0256014	0.0722973		0.150871	0.0284088	0.0433651		0.0343843	0.0154222	0.0445753	-0.0463051	-0.0319431	-0.0342203	-0.0491909		0.0137213		-0.055362		-0.0234008		0.0135106	-0.00884125	-0.0299813	-0.0546948
19.94	0.0452785	0.0438642	0.150681		0.188302	0.0673088	-0.0201148		0.0535732	0.0114874	0.0464075	-0.00602876	0.0440447	-0.0220622	-0.00485372		-0.00396712		-0.0348136		0.0281756		-0.0393155	-0.0130498		-0.0262607
19.96	0.00144913	0.038448	0.0435635		0.142238	0.0486945	0.062676		0.0222283	0.0223948	0.0331986	-0.0251135	0.0270333	0.00990297	0.0156033		0.0475476		-0.0329866		0.0312967		0.0136081	-0.0106463		-0.00489223
19.98	0.0293953	-0.0013331	0.045734		0.141981	0.0304847	-0.0122567		0.0503368	0.0262865	0.0626703	0.0132414	-0.0139398	-0.00942704			-0.0220347		-0.034906		0.0200585		-0.0319932	-0.0195909		0.0426416
20	0.00966169	0.00552878	0.0361569		0.0989095	-0.0113132	-0.0015039		0.0313106	0.00829602	0.0241417	0.00487556	0.0284264	-0.0124789			0.0387893		-0.0211519		0.103001		0.00886699	-0.0272059		0.00295517
20.02	0.00410991	-0.0162456	0.0605021		0.108794	0.0945554	0.0230903		0.0418485	0.0120271	0.0326496	-0.0259459	0.0442032	0.0181421			0.0485364		-0.00617722		0.0154091		0.00742828	-0.0417699		-0.0449346
20.04	-0.0275975	-0.01835	0.0578496		0.134589	0.0125703	0.0386363		0.00797451	0.0368209	0.0179717	-0.0110027	0.0219409	-0.0110513			-0.0308716		-0.0252099		0.0422047		-0.0320812	-0.0850961		0.000585258
20.06	0.000729058	0.055205	0.0747378		0.139999	0.0315812	-0.0147967		0.0445489	0.0360699	0.0531712	-0.0036828	0.0679157	6.85689e-05			-5.69559e-05		-0.00705151		0.0353621		0.00366766	-0.0282172		0.00711463
20.08	0.0579488	0.0546699	0.0465373		0.0924989	0.0212074	0.00698006		0.0472728	0.0308217	0.0719389	-0.00796486	-0.000694153	0.0469254			0.034041		-0.00443113		0.0786924		0.0358257	-0.0700642		0.0280698
20.1	0.0121934	0.0672397	0.0506132		0.130617	-0.0447701	0.0324309		0.050357	0.0250992	0.0458001	0.0136469	-0.0177089	-0.0026552			0.000400052		-0.0233552		-0.00365893		-0.0589224	-0.0505364		-0.0186528
20.12	0.0227685	0.0656523	0.080576		0.210888	0.116872	0.0315475		0.0440627	-0.00673612	0.0368553	0.0208498	-0.0165067	-0.0263709			0.0111365		-0.00407092		0.0469807		-0.0347906	-0.0328727		-0.0239802
20.14		0.0483423	0.0786894		0.106065	0.077298	-0.0521667		0.0450543	0.062978	0.0360609	-0.0665539	0.0417514	-0.0242862			0.0164308		0.0252307		-0.0135655		0.0238497	0.0166551		-0.0421574
20.16		0.0171227	0.0996017		0.0716445	-0.0422936	0.0211778		0.0600937	0.00174609	0.0284927	0.0233446	-0.0317151	-0.00697281			0.0179019		-0.0249465		-0.0222406		-0.0559592	-0.0376766		0.04501
20.18		0.0606308	0.054385		0.104672	0.0604809	-0.0177858		0.0393404	0.0186495	0.043768	-0.0480205	0.0382149	-0.0495835			0.0108521		-0.00694452		0.01524		-0.0144469	-0.0667274		-0.0515985
20.2		0.00365385	0.0370321		0.0815173	0.128694	-0.0268697		0.0581571	0.00296429	0.024977	0.00598095	-0.00219008	-0.0382822			0.0660131		-0.0274286		0.0659766		0.0190651	-0.0521106		0.0346495
20.22		0.0647726	0.0984833		0.0972293	0.0513406	-0.0651602		0.041333	0.0232823	0.0533536	-0.0162466	-0.035348	-0.0369714			0.0322692		0.0131475		0.0320464		0.0272253	-0.0626586		6.80151e-06
20.24		0.0181809	0.0568972		0.138647	-0.0101824	0.0196708		0.027799	0.0446842	0.0577789	-0.0076151	-0.00691348	-0.0074432			0.0508299		-0.00874709		0.102615		0.00613635	-0.0472416		0.0741334
20.26		0.0382674	0.0932308		0.119375	0.0696511	-0.0075815		0.0580557	0.0143849	0.0874882	-0.0379609	0.0276148	-0.0528127			0.0288406		0.00491855		0.0453357		0.00986499	0.029928		0.0335688
20.28		0.0135491	0.043828		0.12485	0.115189	0.0206789		0.0406497	0.00521488	0.0341545	0.052662	0.00357151	0.0366363			0.0209469		-0.0554855		0.0877261		0.0557597	-0.0233364		-0.0165544
20.3		0.0858688	0.0697471		0.0952381	0.025365	-0.0129006		0.0493191	0.02051	0.0345248	-0.0410997	-0.00805314	-0.00919233			0.0120752		-0.0316814		0.0912135		-0.000463333	-0.0499585		-0.0384766
20.32		0.0236613	0.0878445		0.0974034	0.0457193	0.0439669		0.0515584	0.0116227	0.0257758	-0.0276536	-0.051192	-0.0200256			0.0254673		-7.36654e-05		0.0429925		-0.0187635	-0.0149897		0.0254725
20.34		0.0143779	0.0718851		-0.00447365	0.14182	-0.0325136		0.0417576	0.0164256	0.0421793	0.0805115	-0.0649859	-0.0175045			-0.0189253		-0.00303067		0.00826215		0.00841245	-0.0494055		-0.0611489
20.36		0.0525825	0.068482		0.0823553	0.0207595	0.0120379		0.0483296	-0.00325044	0.0309841	-0.0252876	-0.03079	-0.0335821			0.0972026		0.0209176		-0.00302702		-0.0290037	-0.00561609		0.00505548
20.38		-0.020808	0.125077		0.0955381	0.113586	0.0130028		0.0322112	0.0199486	0.0258558	0.00110771	-0.0644711	-0.00782114			0.0552609		-0.00696003		0.0442392		0.0125103	0.0097132		0.0226804
20.4		0.0169978	0.0473628		0.0565422	0.0646329	0.0564911		0.0378247	0.0321365	0.0441689	0.0216113	-0.00387477	-0.0307896			0.0456579		-0.023329		0.0248276		0.0222626	-0.0536878		-0.0077182
20.42		0.0344854	0.0881048		0.0355948	-0.0629752	-0.0451652		0.0265659	0.00739286	0.0311032	0.0351018	0.0129489	0.00852858			-0.0196122		-0.00958886		0.0271315		-0.0489166	-0.079452		0.0173325
20.44		0.0266425	0.0525567		0.105981	0.0101576	-0.0161655		0.0298229	0.0341645	0.0405104	-0.0220813	0.00586161	0.0305			-0.0568611		0.0330554		0.0108915		-0.0367234	-0.0929347		-0.0208743
20.46		0.0317105	0.100682		0.0678432	0.0706397	-0.0103014		0.0272509	0.0351424	0.0435373	0.00749568	-0.0352087	-0.0109203			0.0406122		-0.0540443		0.0647168		0.0518161	-0.111424		-0.0109601
20.48		0.00684823	0.0520778		0.146563	0.0339795	0.0162012		0.0328083	0.0291026	0.0483284	-0.032974	0.0338246	0.0218726			-0.00279863		-0.0322011		-0.0159829		0.0145126	-0.0350606		-0.00762176
20.5		0.0693204	0.0987145		0.13616	-0.0122445	0.00844185		0.0188407	0.0471982	0.0460328	0.047478	-0.0555062	0.0252451			0.0160574		0.0206935		0.0635976		-0.046538	-0.0486735		-0.0315484
20.52		0.00482688	0.0390909		0.156765	0.147036	-0.0111497		0.0465906	0.0385779	0.0435941	-0.0184547	-0.0548016	-0.0343989			0.0506968		0.000355601		0.0101447		-0.00832857	-0.039221		0.00249661
20.54		-0.0154684	0.0543961		0.0953621	0.02681	-0.0357609		0.0286104	0.0381813	0.032838	0.00464401	-0.00387588	0.00684372			0.0791962		0.0154511		0.0824403		-0.00498468	-0.0145082		0.0170574
20.56		-0.00579196	0.0665864		0.127047	0.0515277	0.0369007		0.0303019	-0.00407	0.0315088	-0.0448905	0.0502911	-0.0312213			0.0151268		-0.0176492		0.0168156		-0.00993469	0.00757971		0.123915
20.58		0.0483964	0.0678507		0.123342	0.0760581	-0.0148358		0.0283236	0.0438645	0.0520025	0.0495533	-0.0331724	-0.00195694			-0.0482699		-0.0173008		0.0504507		0.00676918	-0.0027013		-0.0281176
20.6		-0.013904	0.000139419		0.152847	-0.000359901	0.0455362		0.0278511	0.0137068	0.0147141	-0.0244012	-0.0711443	0.0109151			0.0338379		0.00259585		0.0744179		0.0117423	-0.0759448		0.0303419
20.62		0.000166057	0.0437156		0.0683034	0.0210793	-0.00316981		0.0132503	-0.000157065	0.0322085	0.00381045	0.0234018	-0.000803049			0.0300785		-0.0270921		0.0744051		0.055775	0.000291751		-0.0207457
20.64		0.0484463	0.0424904		0.0990257	0.0732549	-0.014959		0.0253814	0.0396294	0.0624605	0.0516539	-0.0353943	-0.0122278			0.0299507		0.00465355		0.058159		-0.00397184	-0.0183434		-0.0192049
20.66		-0.00968033	0.0468148		0.111868	0.0655428	0.0417501		0.024029	0.0486218	0.0299624	0.0313501	0.0160244	0.00673328			-0.000921501		0.0108436		0.00130599		0.0326161	-0.00249049		-0.0714529
20.68		-0.0155155	0.0939317		0.136584	-0.0186018	0.00119991		0.0188329	0.0475359	0.0415056	0.00600596	-0.0731583	0.0237961			-0.0326676		0.0182258		0.0781227		-0.0283569	-0.0741479		0.0234197
20.7		0.00516231	0.041853		0.0875693	-0.0199765	0.022485		0.0357065	0.0470826	0.0522046	-0.00976055	-0.0644438	-0.0292042			0.0273508		-0.0244568		0.0162106		-0.0610621	-0.00659307		3.09271e-05
20.72		-0.0539947	0.0427643		0.13385	-0.0533129	0.05067		0.0146794	0.0396321	0.0417927	0.0543031	0.0555572	-0.0221855			0.0148194		-0.0160489		0.0279498		0.0165725	-0.0566227		0.0398628
20.74		0.0177582	0.0495479		0.115711	0.0783002	0.0161633		0.0334069	0.0193518	0.0367133	0.119348	-0.0144765	0.0102033			0.0108885		-0.0536274		0.0498121		0.00100059	-0.0286719		-0.0470208
20.76		0.0652585	0.0537458		0.0950398	0.0990095	-0.0133265		0.018542	0.0250964	0.0489335	0.0210384	-0.0117996	-0.039173			0.0200187		-0.00352497		0.0418248		-0.00716867	-0.0592034		-0.0263533
20.78		-0.0203702	0.0784569		0.0930256	-0.0728622	0.000934598		0.0238353	0.0207782	0.0310252	0.0620789	-0.0314824	0.00764669			0.0335883		-0.00863367		-0.0126437		-0.0201696	-0.0535716		-0.0229883
20.8		0.0296502	0.0828008		0.0794982	0.0216444	-0.0107993		0.0381218	0.0270493	0.0525323	-0.0134572	0.0121166	-0.00630237			-0.059288		0.0146329		0.0148326		0.00343824	0.0110279		0.00989764
20.82		0.0490066	0.091691		0.202113	-0.02478	-0.0513413		0.0230374	0.0184717	0.0252669	0.0477949	-0.0271912	-0.0500606			-0.0429812		-0.0518486		0.0929199		-0.0141708	-0.0242773		0.0149048
20.84		-0.00354281	0.072765		0.144569	0.0450708	0.0386839		0.0176941	0.0226979	0.0353716	0.00608085	0.0121753	0.000796857			0.0574632		0.00875305		0.063238		-0.0561674	-0.0247069		-0.0248122
20.86		0.0217492	0.0854038		0.0561945	-0.00690257	-0.0107804		0.0282071	0.025911	0.0410524	-0.0182071	-0.0289382	0.0181762			-0.048091		0.0239423		0.0339161		-0.0248602	-0.0989034		0.0959438
20.88		0.0568843	0.0846789		0.119737	0.104731	0.0436823		0.026332	0.037117	0.0383159	0.0249121	-0.0404084	-0.00821938			0.0465856		-0.0212522		0.0396239		0.0156443	-0.0336638		-0.0446873
20.9		0.0316175	0.121187		0.0652892	0.148217	-0.0261354		0.0140285	0.0166982	0.03611	0.0134336	-0.0844814	-0.00166975			0.0128092		-0.00818572		0.0594337		0.0351599	0.00895882		0.0177903
20.92		0.0270195	0.101432		0.240307	0.0540379	-0.00642486		0.0151631	0.0299411	0.0367485	0.021416	0.0364683	-0.0174462			0.0316581		-0.0338343		0.00169094		-0.00272734	-0.0374628		-0.00626102
20.94		0.0176546	0.0572441		0.185602	0.10689	-0.0496453		0.0440012	0.0185693	0.0647023	0.00618538	0.0266265	0.00883907			0.0407634		-0.022154		0.0733311		-0.0388627	-0.0683848		-0.0257371
20.96		-0.0266923	0.0526785		0.106848	-0.0387852	0.0427288		0.0118429	0.028411	0.029168	0.0347811	-0.103674	0.0256151			0.0313999		0.00425849		0.125772		0.0264441	-0.027212		0.0527764
20.98		0.0277934	0.0358697		0.12809	-0.00512729	0.0302252		0.0258333	0.0243589	0.0534359	-0.0147268	-0.00460725	0.0109969			0.0260149		-0.0233952		0.0539021		-0.044056	-0.0420129		-0.0407322
21		-0.0264174	0.0590951		0.100704	0.0618999	0.00913002		0.047467	0.0151435	0.0434059	0.0505583	-0.00625476	0.013928			-0.0152646		-0.0113304		0.0073746		0.00754752	-0.0463037		0.0169737
21.02		0.0157647	0.0423999		0.15774	0.0220384	0.0291772		0.033391	0.00596986	0.0523941	-0.0312877	-0.00289486	0.00301373			0.00873057		-0.0259782		0.0880951		0.0504219	-0.0878309		0.0163974
21.04		-0.00351553	0.0702022		0.0949568	-0.00541185	-0.00419807		0.0203458	0.0167839	0.0322562	-0.0029891	0.0109286	-0.00389549			0.0220916		-0.0134524		0.0138291		0.066632	-0.0114195		0.0101974
21.06		0.0439155	0.069491		0.109478	0.0423438	-0.000679861		0.00412469	0.0279094	0.0618113	0.0217233	-0.0911904	-0.0395577			-0.000362532		-0.0491944		0.0358861		-0.026342	-0.0249377		0.00269227
21.08		0.0716108	0.0282174		0.0567919	0.123363	0.00698392		0.0196688	0.00900247	0.0595899	0.0403141	-0.00129445	-0.0307085			0.035591		-0.0308556		0.0408501		0.0279208	-0.0220443		-0.0522261
21.1		0.000863803	0.0649513		0.144109	0.10511	-0.00058231		0.023601	0.0249638	0.0356202	0.0501105	-0.0252465	0.00446319			-0.0468108		-0.00846956		0.0562838		-0.0169963	-0.0243656		-0.040139
21.12		0.0422241	0.0534518		0.0460285	0.015153	0.0126912		0.0291788	0.0447215	0.0208002	0.00754633	-0.0311255	-0.0426361			0.0413599		0.00557607		-0.0521861		-0.0103642	-0.0922457		0.0193012
21.14		0.00937161	0.061876		0.0535378	-0.0362194	-0.0234729		0.00843734	0.0279206	0.0410015	-0.00994734	-0.00676529	-0.0320491			0.0561465		-0.00788639		-0.0103506		-0.00408437	-0.0321484		0.0614391
21.16		0.0279934	0.107208		0.0539333	0.0311089	-0.0500029		0.0287141	0.0349216	0.0466432	0.0269119	0.0162802	-0.0339132			0.0378321		0.0234002		0.00923987		-0.0274034	-0.0438597		-0.0605237
21.18		-0.0022695	0.0371875		0.0646273	0.0985226	0.0136583		0.0300651	0.046371	0.0218988	0.0479334	0.00140693	0.0532128			0.0442529		-0.0294144		0.0346484		0.0437895	-0.00926317		-0.00864022
21.2		0.00204517	0.0286599		0.0702911	-0.0413073	0.0330785		0.0237577	0.0120521	0.033827	-0.022982	0.0112869	0.0153804			0.0744199		-0.0104613		0.0429829		-0.00438747	-0.0436344		-0.00979901
21.22		0.0493137	0.0257744		0.148206	0.0636796	-0.00319785		0.0043164	0.0231466	0.0381252	0.00804835	-0.0154368	-0.00032078			0.00577741		-0.00700152		0.0332222		0.0173807	-0.0224364		0.0226591
21.24		-0.0205702	0.0594624		0.100547	0.0483012	0.00523147		0.0230944	0.0362254	0.0308675	-0.0250934	-0.0188348	0.0298191			0.0520509		-0.0525595		0.0621892		0.0154462	-0.0340924		0.0212576
21.26		0.0396861	0.0543998		0.0849326	0.0698742	0.0631794		0.0224285	0.0185842	0.00303907	-0.0224191	-0.00122354	0.0265664			0.0267793		-0.0244915		-0.00483449		0.0222723	-0.100977		0.0190425
21.28		0.0192861	0.0493515		0.121502	0.0626981	0.0930722		0.0273391	0.0263609	0.0471837	0.0228218	0.0731632	-0.0111411			0.0449865		-0.0247819		0.0194306		-0.0446671	-0.0153797		-0.0693913
21.3		0.00386195	0.0685459		0.0297898	0.0637328	0.0246256		0.0206091	0.0355789	0.0154095	0.0106496	0.0246796	0.0135718			-0.00433261		-0.00695679		0.0190442		0.0183628	-0.0382255		-0.069742
21.32		0.0375573	0.0401667		0.145401	0.0807438	0.0228937		0.00300101	0.0318653	0.032072	-0.00428624	-0.0277545	-0.0359771			0.102557		0.0275168		-0.0119966		-0.000777496	-0.0481741		-0.00561716
21.34		0.0550926	0.0579192		0.0671919	0.058154	0.0152983		0.0190825	0.0194571	0.056104	0.00686025	-0.0298171	0.00632384			0.0169117		-0.0250281		-0.0599391		0.0414097	-0.0697269		-0.00875027
21.36		0.00997598	0.0757024		0.098488	-0.0399094	0.0185066		0.049902	0.0473297	0.0419238	-0.0184452	0.0789935	0.00835941			0.00976957		-0.0348188		0.00552095		0.0684167	-0.0636685		-0.00438445
21.38		0.0678243	0.0712308		0.142162	0.0942685	0.0244204		0.0304063	-0.00252235	0.0148188	0.0427796	-0.06101	-0.00930662			0.00541782		-0.0128086		-0.0162807		-0.0333739	-0.0989466		0.0143134
21.4		0.0129788	0.0688192		0.133985	0.115575	0.0287528		0.0149363	0.0228217	0.0560531	-0.00824397	-0.0238725	0.0355899			-0.033604		-0.0505877		0.0736877		-0.00355172	-0.0349918		0.0335021
21.42		0.0629228	0.0410678		0.0525668	0.0129767	-0.00101683		0.029185	0.0194002	0.0410843	-0.0154235	0.000976825	0.0027518			-0.0262226		-0.0384531		0.101725		-0.00650675	-0.0570575		-0.0165275
21.44		0.0371208	0.0794463		0.158739	-0.0181682	-0.0164507		0.0313271	0.0616604	0.0711839	-0.0128989	0.0431377	-0.0139847			-0.00880248		0.00401527		0.0137543		0.0612782	-0.0749767		-0.00812959
21.46		0.0227177	0.0860409		0.154259	0.0149569	-0.0046824		0.0221583	0.0238653	0.0396007	-0.0111019	0.0044269	0.0115737			0.0247215		-0.00503005		0.0174675		-0.011318	-0.0687723		-0.021858
21.48		0.00132456	0.0255948		0.122373	0.0372002	0.0597884		0.0179272	0.047002	0.0402567	-0.00493203	0.0287969	-0.0308916			-0.00137101		-0.00901821		0.0140224		-0.0238973	-0.0936833		-0.0296531
21.5		0.0305904	0.052896		0.0494359	0.0511283	-0.0267608		0.0279503	0.0171489	0.0415246	0.119134	0.00952439	-0.0238844			0.0358357		-0.0129164		0.00857616		-0.06484	-0.0412211		-0.0192171
21.52		0.023792	0.102827		0.109924	0.037253	-0.0372521		0.0172325	-0.00360356	0.0385367	0.113397	0.0178138	0.00136736			0.0134545		-0.0429606		0.018959		-0.0239044	-0.0228417		-0.0317528
21.54		-0.0566641	0.0231251		0.174556	0.135633	-0.0103187		0.037962	0.0239744	0.0381339	0.0142278	-0.0146664	-0.0266947			0.0286284		-0.0172202		0.0005304		0.074506	-0.0396057		-0.0186322
21.56		-0.0550035	0.057732		0.0459265	0.0997141	0.0498235		0.0142145	0.0322041	0.0239332	0.0114946	-0.087953	-0.0304086			0.0328814		-0.0196951		0.0458086		-0.0275009	-0.0467151		0.0614302
21.58		-0.00616809	0.0347768		0.0742661	-0.0651266	-0.0276819		0.012752	0.0322008	0.0350345	-0.00810401	-0.0653758	0.00550129			0.0402387		-0.00544928		0.0933966		0.0517732	-0.106729		-0.0253868
21.6		0.0313847	0.0912109		0.131436	0.0417608	0.0144309		0.0026109	-0.00569738	0.03889	3.32219e-05	-0.0217509	0.0237144			0.0349433		-0.0385845		-0.00837062		0.0134561	-0.105966		-0.0587017
21.62		0.0590882	0.11264		0.12239	-0.0653435	-0.0193656		0.0102248	0.0102239	0.0494301	0.0265069	0.0334039	-0.0504909			-0.0239316		0.0464314		-0.0189222		0.0302864	-0.0415963		-0.0229433
21.64		0.0332819	0.0740271		0.099275	0.0480636	-0.009201		0.00673873	-0.00340302	0.0271705	0.0715455	-0.00276583	0.0115522			0.0226238		0.0230897		0.0441225		0.0237671	-0.0789057		0.0645903
21.66		-0.0153135	0.0551134		0.140609	0.0352121	-0.0291542		0.0162834	-0.0124563	0.0120844	-0.0424737	-0.015865	-0.0018492			-0.0212031		0.0270359		0.048495		-0.0129198	-0.0428768		-0.0107575
21.68		-0.0395436	0.0287508		0.0429858	-0.0149784	-0.0086602		0.0286714	0.0173735	0.0448539	-0.0196026	-0.0042768	-0.0254585			0.00616805		-0.0303468		-0.00155219		0.107147	-0.0532737		-0.0539974
21.7		-0.0155367	0.0999185		0.156552	0.00508221	0.036172		0.0211345	0.0169541	0.0186389	0.00568849	0.0390763	-0.0346624			-0.00832541		-0.0162626		0.0512164		-0.0102242	-0.0734157		0.0597483
21.72		0.0565562	0.0326289		0.0623577	0.00513158	0.0642523		0.0206848	0.026503	0.0705614	-9.21213e-05	-0.0451513	-0.0128342			0.0705204		-0.0163933		0.0328671		0.0137945	0.0112908		-0.0652263
21.74		-0.0171858	0.0771115		0.211439	0.0804637	0.0362258		0.0290563	-0.01051	0.0366437	-0.0182972	-0.0669603	-0.034382			-0.0568672		-0.00624539		-0.00941013		-0.0352139	-0.0807437		-0.0229095
21.76		0.013629	0.0116903		0.153175	0.0521191	0.0262522		0.0260727	-0.0297717	0.0445544	0.0213158	-0.0174186	0.00588092			0.0303011		-0.0263898		0.0963254		-0.0577447	-0.0246893		-0.0427493
21.78		0.041889	0.0681734		0.0651832	0.0340485	0.00811605		0.00780045	0.00359166	0.0694453	-0.0042545	-0.013201	-0.0046933			0.00145769		-0.00399345		0.0315459		-0.0438158	-0.0843349		-0.0607804
21.8		0.0414137	0.0997011		0.123649	0.10676	-0.00688735		0.031072	0.00653241	0.0254098	-0.0453903	-0.0812764	0.00711057			0.0327612		-0.0242374		0.0365893		0.0932132	-0.0785264		-0.0259476
21.82		0.0437108	0.064753		0.0481282	0.0606308	0.00548728		0.0376037	0.016128	0.0623913	0.0923624	0.0240947	-0.0210099			0.0102171		0.0102258		0.125371		0.0325762	-0.0294221		-0.0971292
21.84		0.0183489	0.0495458		0.116451	0.0391709	-0.010206		0.0255013	0.0140463	0.0310654	0.0661544	0.0364489	-0.00175509			0.0111269		0.019205		0.00397835		-0.0329869	-0.0461547		0.0176932
21.86		-0.0132244	0.0338889		0.129446	0.00669841	-0.022365		0.0491653	-0.000383041	0.0464577	0.00695983	-0.00576377	-0.01722			0.0430112		0.0272228		0.0421888		0.00551698	-0.0876109		0.0382793
21.88		-0.0382672	0.057537		0.124612	0.0938454	-0.0191684		0.0321113	0.0543831	0.0235765	0.0293339	0.0157621	-0.0612946			0.0819639		0.0111592		-0.0246002		0.0399337	-0.098872		-0.0184182
21.9		0.045979	0.0554152		0.140794	-0.0488342	-0.0123171		0.0251497	-0.00601389	0.043705	-0.0332901	-0.0573413	-0.0318753			0.114812		-0.0279793		0.0679058		0.0266037	-0.0364449		0.0175782
21.92		0.0074057	0.0465315		0.104278	0.0992598	-0.00593669		0.0208964	0.045289	0.0337801	0.0150186	0.00659779	0.00362256			-0.0419129		-0.026587		0.054081		0.0358997	-0.0205304		-0.0436595
21.94		0.0766243	0.0989905		0.185948	-0.0051289	-0.0585136		0.00834077	0.0433653	0.0038285	0.0218102	-0.0422299	-0.00263649			0.0219626		-0.0174128		0.0900512		-0.0133435	-0.0591023		0.0306678
21.96		-0.0518577	0.0822238		0.128019	-0.00960478	0.00593817		0.0293868	0.0414034	0.0350928	-0.0146412	0.00135506	-0.00675808			-0.00110761		0.0164987		-0.000395719		-0.00913108	-0.0678771		0.0240626
21.98		0.0272986	0.0544609		0.199533	0.0402672	0.00619016		0.0192138	0.0353025	0.0210134	-0.02032	-0.00597472	-0.0342185			0.0163624		0.0315273		0.0360147		-0.0521542	-0.000842707		0.0101574
22		0.0240094	0.0308349		0.0793263	0.015529	0.0378726		0.00761911	0.0331755	0.0528983	0.0611004	-0.0455292	0.0275681			-0.0126199		-0.0200581		0.026199		0.0117049	-0.0721846		-0.0180314
22.02		0.0657861	0.0785329		0.122275	-0.0635431	-0.0458012		0.0133998	0.0305384	0.0110424	0.0692204	-0.0732898	0.000918022			0.0225447		-0.0204782		-0.0258089		0.0369715	-0.036369		0.0175983
22.04		0.0287204	0.0812654		0.118162	0.0958907	-0.0259125		0.02776	0.0402397	0.0228614	0.0869613	0.0101066	-0.0142473			0.0122239		-0.0603289		0.0333903		0.0318827	-0.00889327		0.0165574
22.06		0.0651186	0.0376246		0.13454	0.0313471	0.0206089		0.031121	0.0362596	0.0363421	0.0234309	0.000538829	-0.00271271			0.0178518		-0.0174701		0.00830416		-0.027701	-0.0461084		-0.00777766
22.08		-0.0306408	0.0617341		0.0422473	0.0611559	0.0477281		0.0378045	0.0179698	0.0431825	-0.0392047	0.0444101	-0.00036175			-0.0199858		-0.00146052		0.034871		-0.0231851	-0.109001		-0.0421732
22.1		0.0492951	0.0627243		0.103662	0.015676	-0.0285129		0.0148486	0.010532	0.0524836	0.0360037	-0.0370396	-0.00679144			0.087834		0.0186319		0.0446688		0.0140299	-0.0712528		0.00874593
22.12		0.0882291	0.0874881		0.190615	0.0732538	-0.00835213		0.0136966	0.0219995	0.0272777	0.0216203	0.0148494	0.00728308			0.0123348		0.0305985		0.0108518		-0.0229379	-0.00902765		0.0343771
22.14		0.0167177	0.0548104		0.0749734	-0.0169051	0.0162217		-0.000432809	0.0356852	0.0354246	0.00292901	-0.0293317	-0.0107062			0.0490348		0.0246109		0.0534247		-0.0759099	0.0167752		-0.0558994
22.16		-0.0136636	0.0541205		0.10816	0.0780334	0.0648217		0.0124067	0.0336351	0.0307347	-0.0663276	0.00790538	-0.0324256			0.0107134		0.0357938		0.0590591		-0.0311692	-0.0594963		-0.0295382
22.18		0.116781	0.0402774		0.0770345	0.0404282	-0.0115721		0.0258865	0.0390323	0.0373751	0.0233825	-0.0294267	-0.0084754			0.0820098		0.00217243		0.0311712		-0.0506778	-0.0393445		0.0453004
22.2		-0.0550284	0.069847		0.192573	-0.00646377	0.052797		0.0019138	0.0301033	0.0546075	0.00521215	0.00196492	0.00015754			-0.0367598		0.00811401		0.0699815		0.0353944	-0.0161969		0.013269
22.22		0.0529786	0.0769207		0.0583501	-0.0946166	-0.00835845		0.014929	0.0230795	0.0276341	0.00454081	0.0327564	0.0144731			0.0242274		0.0191727		-0.0326431		0.0234839	-0.0893789		0.0343515
22.24		0.0121558	0.0413386		0.0881975	0.0180148	-0.00524587		0.020665	0.026531	0.0213699	0.0668783	-0.000573712	-0.0159595			-0.0184012		-0.00310838		0.0683984		0.0359898	0.0175671		0.0182002
22.26		0.0509	0.0281189		0.170054	-0.0183589	0.034405		0.0215798	0.015729	0.0380567	0.0418782	-0.0808891	-0.0338757			0.0154765		0.0105125		0.0824472		-0.0167135	-0.00145538		-0.0263386
22.28		0.033653	0.0979358		0.104453	-0.00323777	0.0358181		0.0325711	0.0310086	0.029027	-0.0242202	0.00481151	0.0217864			-0.000722971		0.021086		0.0372425		-0.0109927	-0.108886		0.00361364
22.3		-0.0153887	0.0341132		0.0641145	0.0600388	-0.0208842		0.020753	0.033814	0.0408245	0.0504563	0.0297513	-0.00420246			0.0734669		-0.00703018		0.00237419		-0.00800752	-0.0540613		0.0290533
22.32		0.0401782	0.0425903		0.124603	0.00702495	0.0206198		0.0339246	0.03829	0.0415426	0.0309199	0.0318517	0.0020011			0.0233981		0.00829981		0.046974		0.0212818	-0.0778811		0.00773809
22.34		-0.03057	0.04897		0.0441513	-0.0326237	-0.00801845		0.0208582	0.00257437	0.0179524	0.0362962	0.00460573	0.0376026			-0.0980825		-0.0138935		0.0523966		-0.00234938	-0.103056		0.0431919
22.36		0.0616677	0.012874		0.00363326	-0.0603134	-0.0192397		0.033312	0.0187375	0.0383177	0.018852	-0.0504354	-0.0394867			0.00912273		0.00219388		0.0588172		0.0336721	-0.0834792		0.00753372
22.38		0.0196444	0.0137167		0.0935042	0.100497	-0.013288		0.0208162	0.0524466	0.0449725	0.00367779	-0.0466583	0.0132186			-0.0103431		0.0286727		0.0961027		-0.0582357	-0.0390928		0.00317563
22.4		0.0489454	0.050438		0.0658583	-0.0111346	-0.0389791		0.00766238	-0.036034	0.0426153	-0.0381543	0.0490611	-0.00715445			-0.0120561		0.0213805		0.0705835		-0.0101845	-0.03641		0.0387394
22.42		0.00710071	0.0431116		0.0916681	0.051253	-0.0213018		0.0073737	0.0266144	0.0641061	0.00937825	0.0373127	0.0182864			0.0648696		0.0454466		0.11742		-0.0185986	-0.11042		-0.0201149
22.44		0.0465017	0.113319		0.0335534	0.052589	0.0424508		0.0144032	0.0217456	0.0273366	0.0307486	0.00866932	0.0103951			0.0145156		-0.00159922		0.0325359		0.0253893	-0.0763335		-0.0153721
22.46		0.0306026	0.080477		0.147894	0.0887826	0.0213351		0.0228233	0.014536	0.0341469	-0.0171073	-0.0399809	0.0110232			0.0069616		-0.0225392		-0.0213934		-0.000529916	-0.0146142		0.0207426
22.48		0.023838	0.0694527		0.11102	0.143649	-0.0331948		0.0153286	-0.0300486	0.0349468	0.0107123	0.0347435	-0.0276426			-0.0382174		0.0192296		0.101774		0.031182	-0.110145		0.00684545
22.5		0.0153167	0.0998587		0.130819	-0.0462957	-0.0327829		0.022434	0.000528837	0.0436569	-0.020098	0.00173856	-0.0146937			0.0182801		-0.011689		0.108915		-0.0146118	-0.0445979		0.00664023
22.52		0.0735765	0.0960958		0.0464665	0.035878	-0.0135595		0.0296595	-0.00583879	0.0208525	0.0312159	0.0076556	0.0247672			-0.0324023		-0.038442		0.0353522		-0.0672989	-0.0513596		-0.0503239
22.54		0.0718706	0.0482964		0.108956	-0.0250257	-0.000595828		0.0391804	0.00954708	0.0346235	0.0116839	0.0336585	0.0168819			0.0695864		-0.0187528		-0.000210089		0.0217336	-0.0799155		0.0211176
22.56		-0.0217034	0.0511001		0.0856033	0.0836485	0.0111171		0.0161365	0.0270364	0.0706721	0.113764	0.00165075	6.03605e-05			0.00636208		0.0144827		0.0155614		0.0408269	-0.034323		-0.0297436
22.58		0.0245139	0.0301471		0.0527722	-0.0100693	0.0206861		0.0100123	-0.00189778	0.0037538	0.0356094	0.00763536	-0.000966934			-0.0301759		0.0496993		0.0215055		-0.02838	-0.0553918		0.00520862
22.6		0.01786	0.0513402		0.0943492	-0.122199	0.0184878		0.0329608	-0.013242	0.0330491	-0.0062476	0.017332	-0.038484			0.0579807		0.00235721		0.0506726		0.0298455	-0.0792447		-0.0162994
22.62		0.0373249	0.0678455		0.117173	0.0552157	-0.0083059		0.0224204	-0.00126249	0.0362149	0.027894	-0.0829626	-0.0440855			-0.0321244		0.0185799		0.0929542		0.0218193	-0.0719263		0.0172378
22.64		0.0461597	0.0349457		0.05525	0.0936557	0.0285244		0.011922	0.0047679	0.0410824	0.0368303	0.00493415	0.0279021			0.0369054		0.00528667		0.0570236		-0.0109294	-0.011596		0.0321026
22.66		0.0232023	0.041557		0.0898873	0.0128257	0.00625455		0.0326928	0.000433542	0.0142991	0.0267698	0.0244447	-0.00769156			-0.00182831		-0.0178963		0.0570681		0.0856344	0.0158812		0.0110097
22.68		0.0234498	0.0421372		0.107737	-0.0864531	0.00237383		0.0319935	0.0224904	0.035619	0.101649	0.00725273	-0.0361221			0.0446033		0.000305214		0.039782		-0.0206423	-0.0643696		-0.0129463
22.7		0.0203086	0.0751378		0.103365	0.00464566	-0.0340415		0.0119516	0.0469239	0.0177081	0.0724279	-0.0640023	0.0167886			0.0473073		0.00601987		0.066731		-0.0292882	-0.0820688		-0.0166998
22.72		-0.00553188	0.0923938		0.108385	0.0794812	-0.00553753		0.0296579	0.0199149	0.024651	0.00308944	-0.0999313	-0.00657244			0.00211548		-0.00465349		0.0260311		-0.0334729	-0.00828291		0.0178697
22.74		-0.0387808	0.040723		0.0295009	0.0264449	-0.0468053		0.0364641	0.0335262	0.0347914	0.0117117	-0.00222686	-0.0292058			0.0268033		0.00830069		-0.00804096		0.0390841	-0.067934		-0.0364501
22.76		-0.0341026	0.0857711		0.19583	0.0741649	0.0347107		0.0131927	0.0358736	0.0396509	-0.0344787	-0.0881231	-0.0101374			0.0580447		-0.039194		0.0329742		0.00321034	-0.0552139		0.0552115
22.78		0.0919922	0.0506484		0.0956597	0.129354	-0.0616151		0.0256361	0.0225803	0.0597074	0.0266018	0.0293426	0.00600866			-0.027675		0.000696272		0.124409		-0.0454485	-0.109607		0.0176488
22.8		0.02388	0.05421		0.0606708	0.012019	0.00193257		0.0194348	0.013258	0.0548513	0.0808772	-0.0197295	0.0308322			-0.0311389		0.00587415		0.054546		-0.00736296	-0.0764753		-0.0773324
22.82		0.0547417	0.065089		0.115101	0.0357545	0.00606477		0.00467041	0.0174001	0.0444335	0.0135221	-0.0231265	-0.00333472			0.0282158		0.0125176		0.0394307		0.0537218	-0.0541214		-0.00257431
22.84		0.0135198	0.0849784		0.116006	0.165486	0.0303744		0.0239158	0.0145576	0.0537046	0.0106314	0.00966159	0.0142974			0.0430881		0.0143001		0.0834628		0.00664105	-0.0441849		-0.0219257
22.86		-0.00117379	0.0378264		0.0863382	-0.0293817	0.00655489		0.0159219	0.0197349	0.0313081	0.0627835	0.0240975	-0.0185568			0.0570979		-0.0232207		0.0460932		-0.0294353	-0.0407075		-0.0348971
22.88		-0.0773219	0.0467924		0.076804	0.0194543	0.0335111		0.0335844	0.00797033	0.0433852	0.079958	0.0175157	-0.00488563			0.0312925		-0.00147897		-0.00589606		-0.0245366	-0.11552		0.0286698
22.9		0.0341478	0.0805787		0.171347	0.0237815	0.000654709		0.0273054	0.0073595	0.0254763	-0.010948	-0.028032	-0.0126827			0.0902729		-0.00980292		0.0732444		-0.0442604	0.00607385		0.0221291
22.92		0.0107492	0.0612749		0.0527617	0.0404171	0.00447944		0.0165751	0.023665	0.0338567	0.0250606	0.00771014	-0.0181419			-0.0144969		0.0122143		0.045485		-0.00330704	-0.0855438		-0.00741369
22.94		-0.0118768	0.0259776		0.125444	-0.0183277	0.0297603		0.0362101	0.0316621	0.022955	0.0925132	0.0526315	0.0094942			-0.0666964		0.0327785		0.0598405		-0.0495624	-0.0601129		-0.0499493
22.96		-0.0279875	0.0450157		0.0562498	-0.0112931	0.0229103		0.0245705	0.0322094	0.013129	0.0356847	0.0159172	-0.0425652			0.0361471		0.046289		0.0428548		-0.0205169	-0.0714519		-0.107336
22.98		0.00354991	0.0721874		0.0513484	0.0415951	0.0217454		0.0293055	0.0194132	0.00939832	0.0301182	-0.000197695	-0.0369001			0.128411		0.0250823		0.0122235		-0.00581233	0.0541788		0.0296872
23		-0.00324395	0.0401097		0.0844391	0.0109831	0.0592461		0.0427314	0.00118664	0.056093	0.0768227	0.0141963	0.0146517			0.0585441		-0.00912674		0.0103208		0.00899605	-0.0142085		0.00874889
23.02		0.0273071	0.0834424		0.12914	0.143302	0.0344941		0.0176743	0.0479341	0.0462607	0.0232733	0.00310139	0.0179297			-0.0274776		-0.00166843		0.108489		0.00531054	-0.0311336		0.0501132
23.04		0.0404333	0.0472794		0.0766999	0.0885454	-0.00439909		0.0333021	0.0154669	-0.00621321	0.00764264	0.0432005	0.0160541			0.0210038		0.0135058		-0.0342513		0.0429131	-0.114717		-0.00928934
23.06		0.0468539	0.0512054		0.135427	-0.0337731	-0.0438		0.0159582	0.00459416	0.0314904	0.0800814	0.0069934	-0.00711502			0.0223826		-0.00504968		0.0905615		0.00206881	-0.00995776		0.0109638
23.08		0.0331536	0.0643347		0.149959	0.164824	-0.0205184		0.0489357	0.0382277	0.0536502	0.0118778	-0.022362	0.0243977			-0.016648		0.00340458		0.0805371		0.00288375	-0.0141003		-0.0393196
23.1		0.0310943	0.0274667		0.107199	0.0320541	-0.0289982		-0.000178667	0.0270436	0.0400923	-0.00253048	-0.0142512	-0.0178365			0.0353324		0.0149439		0.0901703		0.0122765	-0.0252609		-0.0345486
23.12		-0.027362	0.00781014		0.0284705	0.029138	-0.0231505		0.0102355	0.0103497	0.00910157	0.0325984	0.0319813	0.00193796			-0.0188641		-0.0251942		0.0587862		-0.0063754	-0.0497919		0.0106764
23.14		0.00414681	0.0639841		0.0171679	0.0424995	-0.0383318		0.0263821	0.0390783	0.0524048	0.0830551	0.0186824	-0.0354082			-0.00852075		0.0216317		0.00348997		-0.0436546	-0.065164		-0.0476768
23.16		0.036496	0.0553554		0.146129	0.0199025	0.0246382		0.0178253	-0.00363276	0.0308155	0.0255347	0.0734321	-0.0335594			-0.0387831		0.00584289		0.0616735		-0.021401	-0.0410037		-0.0125084
23.18		0.0605049	0.0659865		0.201006	0.00968006	0.00480973		0.018585	0.0329799	0.00982468	0.0262033	-0.039384	0.0199408			0.0343136		0.0120063		0.00794725		0.0137809	-0.000104446		0.0024152
23.2		0.0119447	0.0808732		0.158708	-0.0642628	0.00930258		0.0422357	0.0296358	0.00711102	0.0681468	0.0517715	0.0117919			0.0224666		0.00404556		0.0444522		-0.0364398	-0.042577		-0.0291595
23.22		0.019991	0.0477094		0.140561	0.127552	0.00765743		0.0186051	0.00639609	0.0456297	0.0193474	0.0254679	0.0251084			-0.089119		-0.0276065		0.0331709		-0.00859283	0.0364532		-0.0330937
23.24		0.0496081	0.0274477		0.0618575	0.035636	0.0155203		0.0489767	0.00422858	0.0208858	0.0235688	-0.000156909	0.0150862			-0.00557975		-0.00443759		0.0507023		-0.0126435	-0.101113		-0.0200569
23.26		0.0378659	0.0475193		0.205833	0.0563452	-0.0368973		0.0483602	-0.000320934	0.0464885	0.0258665	-0.00471454	0.0394089			0.0259015		0.00907872		0.0482412		-0.0623991	-0.0215142		-0.0532317
23.28		0.0440765	0.0659934		0.168484	0.0429746	0.00904146		0.0343956	0.0244973	0.0529486	0.0982488	0.0397065	0.0165648			0.0162412		-0.000286124		0.0447626		-0.0435707	-0.0713016		-0.0235081
23.3		0.0370822	0.0512017		0.138519	-0.0141022	0.00542594		0.0129978	0.00960834	0.0462234	-0.0304621	0.000238218	0.0318132			-0.00265913		-0.0260423		0.0659306		-0.0127962	-0.0924486		-0.00790574
23.32		0.000338944	0.0679088		0.0970019	0.101043	-0.00278822		0.04544	0.00625939	0.02076	-0.0100643	0.00430368	-0.00410323			-0.0815295		0.0143433		-0.0118495		0.0258957	-0.0254065		-0.0387495
23.34		0.076647	0.0789922		0.0631613	0.0853767	-0.00774704		0.0252846	0.0236496	0.08617	-0.0383853	0.0121062	-0.0361841			0.0376304		0.0261032		-0.00533135		-0.00179338	-0.0340379		-0.022288
23.36		-0.0362518	0.0302274		0.0837947	-0.0137608	-0.00518109		0.0339875	0.0346405	0.0330591	-0.00178899	-0.0394488	-0.0559875			-0.0448697		0.0149648		0.0291073		0.0401227	-0.0505687		-0.0378847
23.38		0.0444942	0.0904153		0.0583942	0.0263563	-0.0143455		0.0118178	-0.0303115	0.0333731	0.0716499	0.0198994	0.000809601			0.0693678		-0.0364021		-0.0131594		-0.00889773	-0.041025		-0.0376145
23.4		0.0440075	0.0615544		0.0592676	0.122848	0.00431016		0.0182535	0.0318599	0.0390813	0.026169	0.0313165	0.00156806			0.0673901		0.00643249		0.0465205		-0.0182549	-0.034079		-0.0489751
23.42		0.0207487	0.0255687		0.123324	0.0897975	0.000985349		0.0369804	0.0258501	0.0215642	0.0120927	0.0489121	0.00323509			0.0391891		0.000433568		0.0380504		-0.00196339	-0.0499119		-0.0528001
23.44		-0.0374844	0.0293142		0.0357054	0.000495932	-0.00458924		0.0185394	0.00657719	0.038603	-0.0226751	-0.0343695	0.0276771			0.039757		-0.0195007		0.0723397		-0.0378304	-0.0864764		-0.0172578
23.46		0.0670686	0.0690235		0.0528454	-0.0107736	-0.0157491		0.0187863	0.036101	0.0436519	0.00567061	0.0135244	-0.01624			0.00572664		-0.00653493		0.00276468		-0.0185205	-0.015068		0.00496962
23.48		0.0275793	0.0505999		0.111412	0.0793785	0.00518975		0.0326753	-0.011051	0.0287195	0.0470491	0.0256811	-0.0288507			0.0771839		0.0143174		0.0408062		0.00222969	-0.0743809		-0.00783153
23.5		0.0293398	0.0295		0.10695	-0.0101077	0.0117828		0.00588629	-0.0168407	0.02959	0.0144511	0.0392116	-0.014725			0.0210027		-0.0141989		0.0173092		0.016406	-0.0275244		-0.0665129
23.52		-0.01372	0.0992083		0.103123	-0.0701934	-0.00841149		0.0209607	0.0427524	0.0422234	0.0209551	0.00923649	0.00833889			-0.00346059		-0.0038482		0.0604041		0.0508865	0.0221469		-0.00895277
23.54		-0.0140786	0.043363		0.172445	-0.0583263	-0.0684023		0.0463942	0.0116818	0.0651466	0.00364481	-0.0177325	0.0229372			0.0281541		-0.017035		-0.0394284		-0.0228549	-0.0723863		-0.0665512
23.56		0.0320852	0.103535		0.0796111	0.0250374	0.00428067		0.0122098	0.00272612	0.0249973	0.0511887	-0.00614217	0.00549285			-0.0187242		0.0172445		0.0562578		-0.0268443	-0.0382921		-0.0661402
23.58		-0.00422145	0.0326148		0.115047	0.0422306	-0.0274058		0.00604795	-0.0207929	0.0410219	0.00589539	-0.00342738	-0.00696289			-0.0682989		-0.0153639		0.0473327		-0.047699	-0.0615345		0.0268187
23.6		0.0289316	0.0184128		0.194121	-0.00897716	0.04016		0.0227205	0.0390871	0.045618	0.00317877	0.0155783	-0.00382578			-0.00611625		-0.00684326		0.0532295		0.025713	0.00763996		0.0198799
23.62		0.0096758	0.039216		0.169595	-0.0249923	-0.0239082		0.0268811	0.01983	0.0656547	0.00376726	-0.0497399	-0.0381544			2.30846e-05		-0.013867		0.0543245		0.0486126	-0.0347039		-0.00796636
23.64		-0.0270112	0.0889418		0.101972	0.090435	0.0262526		0.00763466	0.000570854	0.0478195	0.0158002	-0.02255	0.0254706			0.0046974		-0.00388274		0.063942		0.0491425	-0.0127333		0.0488572
23.66		0.0335567	0.016775		0.016658	0.0140707	0.0490822		0.0103072	0.0325404	0.0353255	0.0120591	0.0147615	0.0312438			3.76505e-05		-0.00548462		0.0278976		0.0732003	-0.0227055		0.00956189
23.68		-0.00840372	0.053199		0.0735741	0.00725944	-0.0141436		0.0205948	0.0317568	0.0606289	0.0767965	0.0218282	-0.00858217			0.0624429		0.0505571		0.0352183		-0.00835086	0.00632572		-0.0479743
23.7		0.00296541	0.0399172		0.0849706	-0.0579426	0.0429912		0.00579453	0.00892685	0.045049	-0.00495418	0.00647633	0.00128484			-0.0563576		0.0155579		0.0616225		-0.0406711	-0.00613861		0.020622
23.72		0.0514716	0.0824598		0.0658562	-0.0235794	0.00810417		0.00816798	0.0456382	0.0379839	0.0058644	0.0473943	0.0193859			-0.0383914		0.0216946		0.0139295		-0.0345324	-0.0227808		-0.0207941
23.74		-0.000556121	0.071884		0.13471	0.103148	0.0349338		0.0147899	0.0209933	0.0476228	0.023399	0.00895261	-0.0246759			-0.000230928		-0.0107022		0.0462047		-0.0175864	-0.05113		-0.0165677
23.76		0.0113913	0.0780621		0.113041	0.0512127	-0.0278467		0.0462584	-0.00100679	0.045864	0.0347553	-0.0219636	0.0127428			0.0266183		0.0359598		0.0708404		0.0148284	-0.0437364		0.0257844
23.78		-0.0196706	0.0312136		0.122849	0.0883998	-0.0147735		0.032803	0.0091143	0.0486035	-0.0166863	0.0786486	-0.0356132			0.0441919		0.00805947		0.0535034		0.0393037	-0.0104073		0.0455597
23.8		0.0238138	0.0804918		0.130071	-0.0275834	-0.00245805		0.0319908	0.0335753	0.0313043	0.00759415	-0.0152868	0.000203619			0.0338693		0.0162598		0.0243712		0.0536135	-0.0230123		-0.0191209
23.82		0.0516086	0.044812		0.0447406	-0.0218969	-0.00259063		0.0247763	0.00760818	0.041984	0.00608182	0.0216983	-0.0202095			0.0886498		-0.0342342		-0.0101775		-0.0278573	-0.0331613		0.0130311
23.84		0.0456984	0.0741401		0.136002	-0.0384477	-0.0585132		0.0141545	0.00688494	0.0363896	-0.0195829	0.00404847	0.0289569			0.0606442		-0.0216197		0.0172881		-0.00218384	-0.0231686		-0.00153533
23.86		-0.0188429	0.0663215		0.133536	0.00802162	0.0145149		0.0444263	0.0236854	0.0140428	0.00318584	-0.020546	0.0272278			-0.0103304		-0.037269		0.0264884		0.00884883	-0.0167699		0.0341814
23.88		0.0345953	0.0441478		0.0665147	0.0246028	0.00188821		0.0300483	0.000668606	0.0465914	0.00550351	-0.0165637	0.0193189			0.019692		0.0549843		0.070416		0.00964925	-0.0464074		-0.0538008
23.9		0.0356741	0.0622382		0.115391	-0.00154019	-0.00662505		0.0131869	-0.0404181	0.0430865	-0.0242293	0.00970471	0.00872092			0.0459057		-0.0138064		0.00218165		0.00983358	-0.0130934		-0.0233972
23.92		0.00819887	0.0699875		0.0795461	0.103017	-0.00133051		0.0271927	0.0185363	0.0112741	-0.0244208	0.0230873	-0.0120615			0.0269412		-0.00855146		0.0224665		-0.0388704	-0.0126541		-0.0070406
23.94		0.0197827	0.104616		0.045242	0.0140504	-0.0256058		0.0143633	0.00405114	0.0247301	0.0234737	0.0184373	-0.0275002			-0.00482929		-0.00464328		0.0255533		0.0272393	0.0467352		-0.0430549
23.96		0.0456389	0.0506047		0.0725329	-0.00292815	-0.00182926		0.0227501	0.00510738	0.0436594	-0.0059319	0.0372733	0.00967582			-0.0389428		-0.028749		0.00116723		0.0360615	-0.0807394		0.0230597
23.98		-0.0573878	0.0465443		0.12548	-4.89434e-05	-0.0102503		0.0359112	0.0346999	0.0448575	0.0277967	-0.00325111	-0.030982			0.0198925		-0.028609		0.0626724		0.0301503	-0.0991836		-0.0154355
24		0.0515924	0.0928237		0.105193	0.0910101	-0.0106988		0.0245861	0.0232143	0.0372108	-0.0173456	0.0254474	-0.00454197			-0.0319412		-0.00471771		0.0405489		-0.0163469	-0.0243847		0.0554228
24.02		0.00413721	0.103593		0.181887	0.0512919	0.0210396		0.0177489	0.0196276	0.0323372	0.0135799	-0.0380399	-0.000644884			0.0251713		0.00233086		0.00706747		-0.0100302	-0.00738938		0.0351495
24.04		0.0300929	0.0232262		0.0834814	0.0723087	0.0327892		0.0165135	0.00976682	0.0231466	0.0343367	-0.0200065	-0.0319944			0.0532357		0.00569444		0.0278879		-0.0173637	-0.0113454		-0.0188715
24.06		0.0350112	0.054792		0.11031	0.0417924	0.0342051		0.0170152	0.028264	0.0353948	0.0279268	-0.0696262	-0.00485244			-0.00383031		0.0226425		0.0866673		-0.0543698	-0.026754		-0.0177628
24.08		0.0221691	0.0499419		0.100515	0.0579402	0.0128195		0.0243897	0.0389272	0.0427529	-0.0179847	0.0172944	-0.00737444			0.0162306		0.0174171		0.0800873		-0.0253809	0.00164706		0.0302053
24.1		0.035603	0.0925816		0.104927	-0.0392751	-0.0359446		0.0308129	-0.0177199	0.0324432	0.0175484	0.00181613	-0.0144193			0.0352839		0.00674279		0.0572549		0.0064059	-0.0416936		-0.000100663
24.12		0.0102421	0.0570798		0.104011	0.0763002	0.000756606		0.0408623	0.0192919	0.0492043	0.0613703	-0.00105789	-0.00221875			-0.0432744		-0.0197716		0.00744296		-0.0253452	-0.00119375		-0.0252185
24.14		0.0288528	0.0405352		0.0376727	-0.0211738	-0.0330546		0.0265698	0.0277029	0.0350324	0.0574359	-0.0359743	-0.0197403			0.00713097		-0.0186905		-0.0133973		-0.036697	-0.0394032		0.0379144
24.16		0.0315504	0.0924701		0.0568729	0.0605311	0.0301868		0.0303663	-0.0213338	0.0428062	-0.0171385	0.0478701	0.0175673			0.0183541		0.0237651		0.0817778		-0.0612303	-0.0204832		0.0408668
24.18		0.0104171	0.112432		0.0840285	-0.032726	0.00828704		0.0162278	0.0103137	0.0425852	-0.0131688	-0.100172	-0.0136543			0.0425223		0.0280822		0.0414706		-0.0195322	0.0192599		-0.0496775
24.2		0.0209156	0.0565643		0.180651	-0.028451	0.048531		0.0245385	0.0182103	0.0559568	0.0198705	0.0405713	0.0030244			-0.0307991		0.0376033		-0.0252514		0.0314382	0.0105533		-0.00454451
24.22		0.0381851	0.0540903		0.0396957	0.0168681	-0.0211744		0.0131502	0.00763508	0.0503809	0.0315173	0.0119228	-0.0106674			0.0423557		-0.00167041		-0.00361212		0.00795308	9.95942e-05		0.0439902
24.24		0.0246703	0.0128359		0.0939244	0.021116	-0.00121222		0.0352108	0.0316085	0.0141483	-0.0358645	0.00888255	0.00405216			-0.0239605		-0.0438373		-0.0168279		0.0822454	-0.0440344		-0.0210948
24.26		0.0446884	0.0423465		0.138091	-0.0298078	-0.0135027		0.0408601	0.0101902	0.0338623	-0.0443496	-0.00679299	-0.0467741			0.0316953		-0.0228598		0.0317287		-0.000251655	-0.0140892		-0.0302812
24.28		0.0305693	0.0710129		0.125134	0.07328	-0.0309177		0.00512765	0.00403351	0.0273529	-0.0257784	-0.00397955	0.0380563			-0.0124161		0.0209277		-0.0206124		-0.0361429	-0.0177391		0.0194934
24.3		0.025729	0.0227		0.0535398	0.0197228	0.0106141		0.014048	0.0373505	0.0276227	0.0235903	-0.036078	0.0401071			0.019024		-0.00205557		-0.00245289		-0.0227312	0.00203171		-0.00697609
24.32		0.0168475	0.0397978		0.0618823	-0.053864	-0.0337864		0.0200975	0.0397861	0.0100416	-0.0242727	0.00941198	0.0219038			0.0445032		-0.00785398		0.0431418		0.111808	-0.0877711		-0.00332985
24.34		-0.00861903	0.0257444		0.0691699	-0.0133954	-0.0036309		0.00620253	-0.0159252	0.0304647	-0.0400945	0.0157504	0.00919159			-0.0156656		0.0195567		0.0461516		0.021701	0.0100958		-0.00363928
24.36		0.0389193	0.0340007		0.0306936	-0.00249773	0.0164636		0.0133413	0.00480822	-0.00232766	0.00746544	0.0127984	-0.0044804			0.00249894		0.00957853		0.0594839		-0.0208883	0.00732952		0.00898343
24.38		0.0223039	0.0350922		0.123846	-0.0304628	-0.0464227		0.0573885	0.0537585	0.0491549	-0.0280929	-0.0256441	-0.0355555			-0.0269489		0.0402711		0.0155219		0.0425737	0.00738644		-0.00866871
24.4		0.0306641	0.101926		0.10372	0.0449245	0.0113851		0.0103737	-0.0189041	0.0397022	-0.0382534	0.0279615	0.0115257			0.0280769		0.0228449		0.0205473		0.00562632	-0.0013762		-0.0243598
24.42		0.0428685	0.0554851		0.11135	0.0985085	-0.00729468		0.00823919	0.0153334	0.0497838	0.010662	0.0084648	-0.022175			0.0462214		-0.0220097		0.0527862		0.0299018	0.00946966		-0.0230058
24.44		0.00940323	0.0893547		0.0407362	0.0241283	-0.071065		0.0174019	0.00284784	0.038788	0.00535388	-0.0345811	-0.0151565			-0.0315936		0.0292119		0.0175463		-0.0373877	-0.0357561		0.00651111
24.46		0.0192628	0.0550554		0.113176	-0.104319	0.00488545		0.0113412	0.0100119	0.0171944	0.0171929	-0.020622	0.0173852			0.0272826		-0.00131908		0.055408		-0.0371179	0.0160308		0.0343162
24.48		0.0175424	0.0293434		0.0818628	0.041559	-0.00304625		0.018348	-0.00707436	0.0234114	0.03424	0.00407381	0.041692			0.0431135		-0.025812		0.00266001		-0.0119939	-0.0270076		-0.0227243
24.5		-0.024952	0.0559869		0.0635711	-0.00515888	-0.0365834		0.0341119	-0.00500525	0.0146051	0.0030247	0.00121012	0.0122207			0.0497755		-0.0343784		0.0269122		-0.0188651	-0.0175956		0.00583785
24.52		0.0182609	0.0529516		0.0720775	0.0182466	0.0286263		0.0101134	0.0304478	0.0261426	0.0230772	0.0400983	0.0342863			0.0637443		0.0254289		0.0637364		0.0506586	-0.0248607		-0.0633527
24.54		0.0390886	0.0280687		0.0477178	-0.0439539	-0.0484558		0.0245161	0.00883997	0.0129373	0.0734525	-0.0170499	-0.0342015			0.0294234		0.00720573		0.0353823		-0.00221304	0.00241943		-0.0419289
24.56		0.0317004	0.0216071		0.126253	-0.0334347	-0.0146033		0.0148244	0.0378255	0.0447116	-0.0363864	-0.00219659	0.0387211			0.037829		0.0424726		0.0400989		0.0114589	-0.0100262		-0.0463655
24.58		0.0530051	0.0613514		0.0385145	-0.00748941	0.0440943		0.0146743	0.0261108	0.0328084	-0.0359674	0.0281282	-0.00529461			0.0293009		-0.0392465		0.0556387		-0.0296741	-0.0172931		-0.0304198
24.6		0.0301325	0.0602522		0.0963351	0.0726186	-0.0270666		0.0199129	0.0196539	0.022811	-0.0329624	-0.00989161	-0.0141205			-0.0283701		0.0353563		0.1171		-0.00483569	-0.016134		-0.0616235
24.62		0.0511922	0.032116		0.0773626	0.0220339	0.0625369		0.0339384	-0.000422423	0.0363338	0.0746373	-0.0130537	0.0152985			0.0544261		0.0243216		0.0141338		0.0117812	-0.0331032		0.0124602
24.64		0.0473286	0.0304022		0.128959	-0.0330527	0.00944487		0.0372186	0.030358	0.0313619	-0.0059191	-0.0145413	0.0354411			0.0353978		0.0234119		0.0398116		0.00803905	-0.00567843		-0.00117832
24.66		0.0670299	0.0529678		0.0868626	0.0604677	-0.0235426		0.0266547	-0.00881994	0.0337317	-0.0282169	0.007436	0.0214848			0.053255		-0.00302424		0.0415371		-0.0202358	-0.00445054		0.0180571
24.68		0.00115213	0.083205		0.114357	-0.0271176	0.0505298		-0.00714973	-0.0170064	0.0053953	0.0408668	0.0533171	-0.0236958			0.00845807		0.013238		0.0812553		-0.0182154	0.0165693		-0.0725829
24.7		0.0705769	0.0953971		0.109725	-0.030963	-0.0626272		0.0314715	0.051362	0.0393597	-0.0474563	0.0871266	-0.0101108			-0.0427713		0.0144884		0.0444311		-0.0498532	-0.0389555		-0.0255888
24.72		0.0451898	0.0876454		0.0956843	-0.0915469	-0.00907803		0.0195059	0.00806691	0.0197813	0.0371012	0.029313	-0.016978			-0.0129842		0.040754		0.0129705		-0.00582201	0.0387388		-0.00899268
24.74		0.0561947	0.0589708		0.0722403	-0.056098	0.00062529		0.0141987	0.00941306	0.0410568	-0.012877	0.0129952	-0.0624646			0.0171401		0.0337983		0.031061		0.0127515	0.0455122		0.0621438
24.76		0.0199704	0.0719893		0.0761334	0.0411132	-0.0379986		0.0120755	0.0222606	0.0440055	0.0748137	0.00471873	0.00162547			0.0152429		-0.0140099		0.0336073		-0.0198244	-0.023219		-0.0571754
24.78		0.0301307	0.0179422		0.15141	0.0853886	-0.0018089		0.0158776	-0.00215731	0.0313335	0.0594697	-0.0305242	0.0414004			-0.0157469		0.0159093		0.0628112		-0.0520867	-0.0135493		0.0478962
24.8		0.0430188	0.091695		0.0675172	0.0382238	0.00605366		0.0106699	0.0272977	0.0386582	-0.0133061	-0.0412326	0.000998075			0.0168393		0.0215195		0.0725661		-0.00104276	0.0262015		-0.00544564
24.82		0.0429297	0.086563		0.171719	0.00529259	-0.0493726		0.034201	-0.00949673	0.0364261	-0.0487446	-0.00979753	0.0361279			-0.00377393		0.00982273		0.0952119		0.0443899	-0.00731149		-0.000793136
24.84		-0.00753393	0.0484051		0.0495591	-0.031066	0.00290306		0.00873762	0.0325977	0.00455912	0.00309397	0.0310599	0.0174372			0.0323718		0.0124771		0.0378549		0.0325274	-0.0214103		0.0193287
24.86		0.0546636	0.0612832		0.113514	0.0507751	-0.00995237		0.0313943	0.00917441	0.0254475	-0.0141516	-0.019118	0.019492			0.000568541		0.0375859		0.0303099		-0.00802195	0.0012409		0.0125072
24.88		0.0101501	0.042767		0.10864	-0.0204138	0.0273377		0.0193333	-0.0145265	0.0369882	0.0606546	-0.0584715	0.0318669			0.00220952		0.020015		0.0543127		0.0355106	0.0496481		0.000433815
24.9		0.0592422	0.0604486		0.0665806	-0.0193623	0.00329314		0.0199487	-0.00140928	0.0441938	0.0123096	-0.0178823	0.0518102			0.00933804		-0.00298205		0.0698718		-0.041871	0.00718576		0.027489
24.92		0.000612782	0.0386535		0.109971	0.0164007	0.00946112		0.0190456	0.0202946	0.0481744	0.05361	0.038282	0.0433893			-0.0478359		-0.0114254		0.0552996		-0.0272543	0.0663012		-0.0146656
24.94		0.0202799	0.0506905		0.117702	-0.064655	0.00517874		0.00523229	0.0264022	0.038959	-0.0188514	0.0146619	0.0302458			-0.0231581		0.0295357		-0.0230303		-0.0175604	-0.0658366		-0.0510892
24.96		-0.0224611	0.0263148		0.095121	0.0817309	0.00983637		0.0223505	-0.00434857	0.0558361	0.000813602	-0.0190438	-0.0411681			0.0365814		0.0284188		0.0563373		-0.016937	-0.022999		-0.00686493
24.98		0.045903	0.021042		0.13337	0.175241	-0.0190659		0.0112371	0.00834618	0.031341	0.0449003	-0.0199643	-0.0232664			0.00897839		-0.0334898		-0.00791345		-0.0236916	-0.0589419		0.0162427
25		-0.00769785	0.0835128		0.183851	0.0482473	0.0411652		0.0189284	0.0176008	0.049632	0.0184145	0.0284799	-0.0205141			0.00398857		0.0139657		-0.0543677		0.0360965	0.0217979		0.0348826
25.02		-0.0282144	0.0407372		0.0753338	-0.00828107	0.010903		0.0199745	0.0117608	0.0425159	0.0174235	-0.016437	0.00795585			0.0552166		-0.00450858		0.0242897		0.0314543	0.0168568		-0.0512149
25.04		0.00785636	0.0723226		0.129514	-0.0274577	0.0217749		0.00986193	-0.00909036	0.0199457	0.00411166	-0.0334115	-0.0167399			0.0258025		-0.0101297		0.0384039		0.0347053	-0.0109051		-0.0084862
25.06		0.00058308	0.0299002		0.108292	0.0159787	-0.0392312		0.02078	0.00770187	0.0133028	0.0536269	0.00871259	0.0163723			-0.00252262		-0.0296851		0.0302529		0.0139923	-0.0150631		-0.0174836
25.08		0.0323859	0.0433295		0.123659	0.0547853	-0.020979		0.00908263	0.0227452	0.0393451	-0.0225207	0.0502724	0.0187286			-0.0373549		0.0249241		0.0592429		0.0253273	0.0300125		-0.0194916
25.1		-0.0163643	0.045548		0.118377	0.0362812	0.0384953		0.0201355	0.0366967	0.0205047	-0.0175155	-0.00246236	0.014048			0.00111055		-0.0104283		0.0459168		-0.0423992	-0.0230787		-0.115303
25.12		0.0172914	0.0526654		0.0685651	0.051282	0.0220313		0.0111516	0.0148492	0.0371639	-0.0468781	0.0634653	-0.0061081			0.0318722		0.0111627		0.0211213		-0.0237656	0.0510965		-0.0110529
25.14		0.0173485	0.0878823		0.12255	0.0714253	-0.0630462		0.0202894	0.0266293	0.0370651	-0.0568643	-0.0704895	-0.0302921			0.0206054		0.0378729		-0.0225672		-0.0321454	-0.00206464		0.0387118
25.16		0.0165076	0.0170197		0.106718	-0.0481141	-0.0242439		0.0270941	0.0358978	0.0402153	-0.0225928	-0.0160549	-0.0030766			-0.0263371		-0.00729303		0.0820591		-0.00363142	-0.0266853		-0.0567034
25.18		0.0164631	0.0442634		0.109348	-0.0549503	-0.0482113		0.0306848	0.00732132	0.0332739	-0.0270856	-0.0328945	-0.00705689			0.0462489		-0.0389267		0.030152		-0.0247485	0.00845037		-0.0528384
25.2		-0.00450706	0.0555197		0.104588	-0.0129364	-0.0047231		0.0170794	0.0061515	0.00888053	0.0947707	0.0249348	0.00955104			0.0340242		0.00728477		-0.00228566		0.0304299	-0.00424605		-0.0309556
25.22		0.0233426	0.0614604		0.111651	-0.0198714	-0.0166014		0.0241455	0.00308971	0.0218933	-0.0553391	-0.00412419	0.00793678			-0.0210618		0.0544395		0.0623672		-0.037529	0.00604134		0.0143635
25.24		-0.0430466	0.0545996		0.0175526	0.114327	-0.024441		0.0360347	-0.00889499	0.0477215	0.0890276	-0.0384587	-0.00749738			0.0396837		-0.0431287		0.0155891		-6.2272e-05	-0.0123874		-0.013369
25.26		0.0178504	0.043774		0.15268	0.0233477	-0.0129472		0.0329435	0.0042881	0.0306825	0.0675663	-0.00824604	0.0412436			0.0765695		-0.0115536		-0.00609004		-0.0479599	0.00818565		-0.0439445
25.28		-0.0103358	0.0565283		0.0875181	-0.0481172	0.0125349		-0.00456338	0.0140633	0.0263435	-0.0370109	0.035182	-0.00802756			-0.0227637		0.0511222		0.091889		-0.00825758	-0.0240294		-0.0277836
25.3		0.0104213	0.0337965		0.0888391	0.0484208	-0.0442623		0.0123278	0.0399217	0.0523661	0.0289105	0.011182	0.04331			0.0348226		-0.0270451		0.0376967		-0.0524831	-0.051167		-0.0194951
25.32		0.0762444	0.0558		0.0900683	0.0145846	-0.00106255		0.0229232	0.0157076	0.0341176	-0.023682	-0.0428932	0.0244313			0.037078		-0.0161095		0.0934899		-0.00144942	-0.00752952		0.000550886
25.34		0.0315157	0.0481171		0.0482196	0.0138678	-0.000725055		0.0237723	0.00537294	0.0460632	-0.000485452	-0.0461847	-0.0220065			0.0144816		-0.0223493		0.0190833		-0.0762313	-0.000862282		0.0078343
25.36		0.0337465	0.0519652		0.0356557	0.054863	0.0231787		0.049592	0.0130291	0.0396554	-0.0206102	0.0363421	-0.0170611			-0.045828		0.000830955		0.0150577		-0.0277474	-0.00178651		-0.0376409
25.38		0.00570627	0.00950414		0.148408	0.115023	-0.0149228		0.00726347	0.00144622	0.0441904	-0.00693965	0.0101429	0.0566114			-0.0281002		0.0186559		-0.00151985		0.000313633	-0.00803469		0.0259846
25.4		0.00348086	0.0625216		0.113632	0.0635819	-0.0296747		0.0184893	0.0491368	0.0155012	-0.0204676	-0.00795064	-0.0151066			0.0373322		0.00466443		0.0518101		0.00168422	-0.0413732		-0.0722669
25.42		-0.00364511	0.0493279		0.00430891	0.00279446	-0.0239678		0.0430507	0.0229838	0.0359197	-0.0119143	-0.0144143	-0.0265952			-0.00396164		-6.24529e-05		-0.0214689		0.0069366	0.0452594		-0.00384363
25.44		0.0631609	0.0742495		0.116477	0.0508581	-0.00633384		0.0210228	-0.000523301	0.019229	-0.0115009	0.00943125	-0.0274174			0.040464		0.00346597		0.0433441		-0.00213678	0.0174254		-0.00235485
25.46		0.0725261	0.0335835		0.0622923	0.083699	-0.011688		0.0169742	-0.0291557	-0.0210436	0.0675506	0.000201524	0.0228611			-0.0343228		-0.02372		0.0469476		0.0289993	-0.0200579		0.0299559
25.48		0.0303869	0.0483727		0.109818	-0.0106641	-0.0282266		0.0167839	0.00731959	0.0430765	-0.00510692	-0.00677569	0.0226986			-0.0745843		0.00736087		0.0580722		-0.00824371	-0.0668215		-0.0455264
25.5		0.0509595	0.0476028		0.111631	0.0819382	0.0140956		0.0303046	-0.00133578	0.0526165	0.0428797	0.00282727	0.000904025			0.0354834		0.0330866		0.0326612		0.00202274	-0.0206015		0.0156043
25.52		0.0353067	0.0293463		0.0402973	-0.0249174	-0.00457029		0.029521	0.016989	0.0368505	0.0658124	0.0188624	0.0107595			-0.00592914		-0.0125878		0.0503518		-0.0238632	-0.00391117		-0.0722121
25.54		0.00318002	0.0464952		0.0292299	-0.0340147	-0.0329672		0.0439306	-0.00550427	0.0384452	0.0399879	-0.0749951	0.0147281			0.0254333		0.00767434		0.0947451		-0.0264274	-0.0106722		0.0153723
25.56		0.0366731	0.036859		0.05137	-0.0575186	0.0522955		0.0168274	0.0154479	0.0251902		-0.00851763	-0.0189042			0.0160461		-0.00312754		0.00241274		0.00825684	0.0395347		-0.00861021
25.58		-0.0396071	0.0260972		0.0782821	0.0230272	-0.0115732		0.0123031	-0.00628369	0.0384339	0.0897469	-0.0433286	-0.0228684			0.0522511		-0.031188		-0.0296604		-0.0145557	-0.0163113		-0.0279733
25.6		0.04529	0.0420535		0.0809936	0.0104525	0.0243639		0.0290104	0.0261604	0.0277447	0.0431167	0.029752	-0.020258			0.101266		0.0674318		0.086524		0.0190316	-0.000847862		-0.00429986
25.62		0.0710306	0.0263664		0.169585	0.133326	-0.0188147		0.0212413	0.0149949	0.016276	-0.0156498	0.0609143	0.00132275			0.00497664		0.0129783		0.0931664		0.0112009	0.0235578		0.0383674
25.64		-0.0126075	0.0426495		0.297545	-0.0177582	-0.0270083		0.00536318	0.0222089	0.0417598	-0.01594	-0.0173138	-0.0258832			-0.0424082		-0.0195002		-0.0285365		-0.0347999	0.0110959		-0.00530181
25.66		-0.0085123	0.0294441		0.0910045	0.0383896	-0.00979182		0.0347913	-0.0196921	0.0401358	-0.000889352	-0.0148949	-0.0101914			-0.0350566		0.0154889		0.0864004		-0.0249283	0.00804492		0.00286893
25.68		0.0230604	0.107604		0.0880478	0.0505495	-0.00880543		0.0209532	0.0399113	0.0489453	0.0639978	0.0518001	-0.00368158			0.0943589		0.00986186		-0.00687256		-0.0184696	0.00784762		-0.0474358
25.7		0.0333255	0.053529		0.0374596	-0.014424	-0.02558		0.00745873	0.0147704	0.0566088	0.033033	-0.00942892	0.00710125			-0.00253956		-0.0506939		-0.0177358		-0.0120574	0.0410881		0.0175613
25.72		0.0139199	0.0163396		0.124687	0.0338933	-0.00402238		0.00281445	0.0523313	0.0253295	0.038345	0.00221327	-0.0210804			0.0277072		-0.0200365		0.0955558		-0.0138868	-0.0486588		0.0680071
25.74		0.0455479	0.00482841		0.0679886	0.0669347	-0.00526141		0.0298397	0.0148845	0.0382066	-0.0140025	0.0260305	0.0175664			-0.0674699		0.0115443		0.0133915		0.0272625	0.0233468		-0.00755767
25.76		-0.00788435	0.0713072		0.12976	0.00564948	-0.0403283		0.0317969	-0.00196302	0.0282071	-0.0217371	0.0358517	0.0347783			0.0204719		0.000113871		0.0726013		0.0243381	0.0545668		0.0135126
25.78		0.0208715	0.0878739		0.11537	0.00879435	-0.0306995		0.0329957	0.00610576	0.0160949	-0.0463135	0.0589506	-0.0379417			0.0240905		-0.0225973		0.0561467		0.0112225	0.0383733		0.0154876
25.8		-0.00236522	0.0205842		0.113639	0.0653425	0.0303384		0.0353902	0.00176482	0.0200354	0.0151546	0.0684718	0.0106805			-0.0492616		-0.00806379		0.0483651		-0.0319173	-0.0404841		0.00458721
25.82		-0.00904578	0.0463307		0.152149	0.0036221	-0.0279303		0.0254925	-0.00371291	0.00419265	0.0491671	-0.01769	0.0705038			-0.00218128		-0.0121575		0.0345129		0.0209241	0.0335599		-0.00326126
25.84		0.0454587	0.036527		0.0892361	0.0113363	0.00352337		0.0162179	-0.0105599	0.0396725	0.0323401	-0.0131907	0.0609246			0.0215749		0.0383658		0.1163		-0.0443356	-0.0347687		0.0262082
25.86		0.0411475	0.0394572		0.119418	0.0392002	-0.00770859		0.00129719	0.00154209	0.04538	0.0265855	-0.0344589	-0.0256003			0.00478353		0.0362253		0.0597122		-0.0669719	-0.0220178		0.00589074
25.88		0.0600103	0.0618321		0.116813	-0.00729526	0.0319625		0.0277108	0.046049	0.0171903	-0.00166756	-0.0106676	0.0235148			-0.0383594		-0.0187188		0.0499945		-0.00279475	0.0082214		-0.0689288
25.9		-0.0426448	0.0180628		0.0758517	-0.0183339	0.0639384		0.021648	0.0156121	0.0336091	0.0216356	-0.0126418	-0.0130557			-0.00171228		-0.0029769		0.0513342		0.0348837	0.0496361		-0.0153047
25.92		-0.0138218	0.0653268		0.0194748	-0.0624652	-0.0503521		0.000939279	-0.00329122	0.0284669	0.0199991	-0.0464971	-0.0076522			0.0350301		-0.0258297		0.0568349		0.0444587	0.0288074		0.0150103
25.94		-0.0517748	0.00609191		0.148392	-0.0165525	-0.00724479		0.0248965	0.00764033	0.0347654	0.00772341	0.020228	0.00239735			-0.0306508		-0.032123		0.0761817		0.0582729	0.0250209		0.0577269
25.96		0.0829772	0.0143859		0.0632785	0.0204171	0.00235016		0.0295273	-0.00357269	0.0311123	-0.0348567	-0.0320222	0.0334506			0.0254725		-0.024739		0.0625124		-0.0218637	-0.0405166		-0.0303947
25.98		-0.0185235	0.0860161		0.109208	0.0153472	0.0121411		0.0167471	0.0141466	0.0392761	0.0546496	-0.0149111	0.0209103			0.00814863		-0.00307152		-0.0173511		-0.019922	-0.00305445		0.00547935
26		-0.0143255	0.0345385		0.125783	0.0166241	-0.0307227		0.015817	-0.0159235	0.0304004	-0.00441568	-0.00276056	-0.0184669			-0.0245907		-0.0331147		0.0437176		0.00814386	0.0120954		0.0220407
26.02		0.0546407	0.0435014		0.0919585	0.0786155	0.0444123		0.029808	0.00038747	0.0294188	0.0316884	-0.0200391	-0.0278759			0.0201886		-0.00888667		0.00437361		0.0473112	-0.029609		-0.0344546
26.04		0.0241603	0.0663931		0.0894633	0.0128489	-0.0185773		0.00171323	0.0311232	0.0397458	-0.0021923	-0.0137065	-0.0208011			-0.0350139		0.0316053		0.0902007		0.00713334	-0.0170518		0.0111145
26.06		0.0924183	0.0539657		0.0943731	-0.0956502	0.00734242		0.0394923	-0.000925603	0.00640865	-0.0110495	0.00508553	0.0371646			-0.0448936		0.00940472		0.00948826		0.0550765	0.0476231		-0.0464496
26.08		0.0427027	0.0551528		0.0663753	0.00807208	0.0149165		0.00839378	-0.00342867	0.0232888	0.00353007	-0.0321437	-0.0160059			0.0185646		0.00338554		0.0716786		0.015451	0.068671		-0.0297452
26.1		0.00603466	0.0244067		0.0557835	-0.0080574	-0.0726353		0.0263993	-0.00468242	0.0509735	-0.000824621	0.0225298	-0.0160961			0.00611861		-0.0283396		0.0690165		-0.0308433	0.0118633		0.0405739
26.12		0.0515289	0.0405754		0.0535662	0.0541277	0.0387884		0.00869418	-0.00305522	0.0288545	0.00385179	-0.0868053	0.0242337			0.0286346		-0.000405896		0.00417437		-0.081333	0.0326073		0.00478007
26.14		0.0443112	0.0465838		0.169062	-0.0207676	-0.0279044		0.0178095	-0.00862409	0.0508408	0.0348259	-0.0420319	-0.0316516			0.0372796		-0.00242136		-0.031568		0.0350638	-0.0246986		-0.0371687
26.16		-0.00755326	2.28757e-05		0.0237493	0.0262791	0.0037889		0.0336835	0.00940384	0.049785	0.0265945	-0.0159765	-0.01479			0.00192596		-0.00879198		0.0128393		0.0547947	-0.0459042		0.0156228
26.18		0.021991	0.0499875		0.154515	-0.0633733	-0.0172479		0.0114207	0.00464279	0.0212864	-0.0111806	-0.0129833	0.00856501			0.0306279		0.0321422		0.0255769		0.0107675	-0.0120581		-0.00174693
26.2		-0.0113701	0.0516109		0.0573621	-0.0355293	0.0426557		0.0215591	-0.00430639	0.0333127	-0.0325693	0.0255397	-0.00941831			0.0318475		0.000284836		0.0495224		0.0263683	0.0380993		0.0215578
26.22		-0.0121967	0.0540563		0.0645283	-0.0239394	-0.031722		0.0467781	0.000104752	0.0221967	-0.0324369	0.0308513	0.0199797			0.017411		0.0053257		0.0549665		0.0045189	-0.0515437		-0.0395908
26.24		-0.0323867	0.0211423		0.0705244	-0.0187898	-0.0171051		0.0256993	-0.00827042	0.0316312	-0.0440927	0.0203537	-0.00845021			0.0214696		-0.0289015		0.0254344		0.00583495	-0.033716		-0.026251
26.26		0.0162655	0.0374948		0.112537	0.130641	0.00887301		0.0210877	-0.00546082	0.000482235	-0.0292419	-0.0220739	-0.0158957			0.0393427		0.0274631		0.015488		0.00553852	0.00539765		0.0262257
26.28		0.0415571	0.0720969		0.0637564	-0.117991	0.0243247		0.0121431	-0.00440224	-0.00566082	0.0100228	-0.03182	0.00499127			-0.000779202		0.00621279		0.0125415		0.045916	0.0658286		-0.0893618
26.3		0.0364127	0.0309652		0.0631627	-0.0120418	-0.0382324		0.00482026	0.0141351	0.0298506	-0.0212828	0.0126766	0.0111962			-0.0171239		0.0179671		0.0284963		-0.0325812	0.0422985		-0.0475357
26.32		-0.00555395	0.0832543		0.105738	0.063314	-0.019687		0.0252773	0.0300333	0.0372681	0.0527121	0.00785136	-0.0253031			0.0489738		-0.0320232		0.00679966		-0.0118492	-0.025335		0.00594474
26.34		0.0417119	0.0509766		0.165322	-0.0120045	0.0276011		0.0236548	0.0402588	0.010027	0.0517719	-0.0384253	0.049445			0.00318554		-0.00238039		0.0100731		-0.0334665	-0.00736257		0.0590819
26.36		0.0342058	0.095699		0.149074	0.0824127	0.00888121		0.00826657	0.0196968	0.0359681	-0.0118339	-0.0051511	-0.00462756			0.0204135		0.00491868		0.0179681		0.013698	-0.0270117		-0.00391489
26.38		0.057675	0.0395331		0.123177	-0.0426574	-0.054962		0.0281522	-0.00832494	0.0458379	-0.018923	0.0152363	-0.0199411			0.0517129		0.0384094		0.019573		-0.0684035	-0.081838		0.0186405
26.4		0.0473524	0.0318744		0.0423666	0.0606284	0.0225012		0.0201456	-0.0128726	0.0271015	0.0151231	0.0320792	0.0311677			0.0240148		0.0041768		0.0602312		-0.0225769	0.0315742		-0.00895654
26.42		0.0476909	0.0380577		0.142173	-0.0221368	0.00491102		0.0174414	0.039524	0.0546098	0.0414774	-0.00506977	-0.0047999			0.0389774		-0.0206482		0.0486082		-0.0550885	0.0204427		-0.0345622
26.44		0.0068473	0.00986595		0.12714	0.101768	-0.0201833		-0.0133001	-0.0123724	0.0148266	0.0588782	-0.00522647	-0.029582			0.0107075		-0.0199736		0.103243		-0.0190329	0.00669646		-0.00338217
26.46		0.0416412	0.0395666		0.0321471	-0.0485064	-0.0475873		0.0207848	0.019099	0.0248634	0.0425782	-0.0368499	-0.046792			-0.00989361		-0.0523111		0.0669716		-0.0356684	0.020961		0.00631307
26.48		0.0197667	0.0475335		0.0588504	-0.00527772	0.00256413		0.0247503	-0.00960167	0.0422838	-0.0530647	0.00711717	0.00493214			0.0426969		-0.0304624		0.0351222		-0.0776302	-0.0467935		-0.0214763
26.5		-0.0312449	0.0229421		0.0780203	0.0534777	-0.00804248		0.0204536	0.0256151	0.0203993	0.0164294	0.0428429	-0.0123606			-0.0109642		0.0555661		0.0289648		0.0219211	-0.0387415		0.00810269
26.52		0.0144814	0.108365		0.154304	-0.0307252	0.0139303		0.0270967	0.0310483	0.0281893	0.0784404	0.00946682	0.000920187			0.0218108		-0.0323982		0.0210847		-0.0493114	0.0399784		0.00155685
26.54		-0.0127478	0.00745024		0.066612	0.0315993	0.00542068		0.0310696	-0.0347245	0.0356157	0.0447444	0.0748596	0.00264781			0.00457845		-0.0122953		0.0708754		-0.00500989	0.0217933		0.0843252
26.56		0.048954	0.0414274		0.144291	0.107099	-0.0310715		0.0244016	0.022117	0.0349263	0.0434712	0.0281409	0.0255576			0.0260968		0.0194092		0.0237179		-0.00446103	-0.0267969		0.0334262
26.58		0.0621148	0.0503565		0.0583714	-0.0524659	-0.0164151		0.0382708	0.0128556	0.0457671	-0.0274082	0.00842501	-0.0204365			0.0199848		0.0186295		0.0186906		-0.0266197	-0.0305893		0.0378116
26.6		0.0127687	0.0671491		0.0744485	0.0283302	0.0546087		0.0140949	0.0214566	0.0311702	0.00177893	0.0433651	-0.00406423			-0.00488622		0.0168769		0.0897961		-0.0561008	0.0170592		-0.00748144
26.62		0.0166505	0.0462808		0.121588	-0.0452596	0.0112019		0.00512277	-0.0069282	0.0102793	0.00844686	-0.02592	0.0132633			0.00402169		0.000107733		0.0358317		-0.00223359	0.0484774		-0.00758896
26.64		0.0503866	0.0211714		0.0217726	0.0276064	-0.0188071		0.0300455	0.0281805	0.0203105	0.0829449	-0.00486183	0.0115887			0.0292968		-0.0320986		0.00728343		-0.00278918	-0.0534912		-0.0303727
26.66		0.0280036	0.0594255		0.120412	0.0466406	-0.0333248		0.0258146	0.0488967	0.0410161	-0.0457379	0.00361522	-0.0101996			0.0458333		-0.0349506		-0.0395311		-0.00701168	0.0106768		-0.0433519
26.68		0.0544663	0.0579348		0.121126	0.0266185	0.0229159		0.000414483	0.00867904	0.0438692	-0.0131746	0.0321318	-0.0195922			-0.00944813		-0.0299354		0.0248261		0.0752201	-0.0108897		0.0211375
26.7		-0.0367688	0.055109		0.118857	-0.0701532	0.0395057		0.00123639	-0.0263342	0.0349653	0.0273854	-0.0199514	0.0179648			0.0618956		0.0215362		0.0379022		-0.0033022	-0.0348892		0.00640589
26.72		0.010949	0.032652		0.120452	-0.0107226	-0.0195033		0.0105323	0.00825592	0.0491136	0.0271197	-0.0171794	-0.0216355			0.0188628		-0.00910179		0.049062		0.0283507	-0.0266451		-0.0416061
26.74		0.00714699	0.0416107		0.110491	-0.0492504	-0.0333293		0.00885407	0.0284097	0.0471367	0.00168021	0.0126008	0.0530103			-0.0111517		-0.0370218		-0.0304828		0.0433351	0.00753166		0.027552
26.76		0.0184396	0.0398539		0.208538	0.0599278	0.0012135		0.026293	-0.000449881	0.0552568	0.0172735	0.0052388	-0.0283696			0.0333298		0.0348742		0.0137506		0.0473285	-0.0192365		0.00666112
26.78		0.0255866	0.0334642		0.0549395	-0.0827331	0.0231648		0.0197424	0.0315572	0.0281194	-0.0195741	-0.0183422	0.0180048			0.104621		-0.00830904		0.066004		0.00136596	0.066811		-0.0105061
26.8		0.0166372	0.0698082		0.0507125	-0.013505	0.0239459		0.0121449	-0.0080263	0.0326793	0.0441518	0.0357248	0.0168839			0.0324365		0.00176105		0.0838337		0.0196632	0.0508759		-0.0288578
26.82		0.0269082	0.0713115		0.0669832	-0.00519627	-0.0118313		0.0227787	0.00386153	0.0261892	0.0381049	-0.0636175	0.0228976			0.0168292		0.0350085		0.0792796		0.0407027	-0.00880413		0.0651541
26.84		0.0337521	0.0366335		0.0855763	-0.0026593	0.00723894		0.0193998	-0.00747281	-0.00230042	0.00784985	0.0466147	0.0448967			0.0799152		0.00654792		0.0309096		0.000377679	0.0431491		0.0213572
26.86		0.0547439	0.0023986		0.0708024	-0.0563864	0.000580868		0.0170757	-0.0169308	0.00969944	0.0247829	-0.0615909	0.031715			0.081123		-0.00246103		0.0685657		-0.00757191	0.015249		0.0157926
26.88		0.00372551	-0.0181429		0.140247	-0.0245832	0.00912695		0.0207375	0.0116849	0.0519983	0.00784266	0.0330482	-0.0108599			-0.00358058		-0.0360952		0.0439608		0.0210643	-0.0232727		0.00500767
26.9		0.0798884	0.0207898		0.0581204	0.0309819	0.0133852		0.00956911	-0.00626396	0.0352101	0.0295573	-0.017312	-0.0475293			0.0443949		0.0195835		0.0500599		0.0574394	0.00115137		-0.0479991
26.92		0.0819711	0.0315648		0.0523434	0.0815174	-0.0129112		0.0207453	0.0443711	0.0414599	-0.0245654	0.0095146	-0.0119595			0.0245624		0.0550213		-0.00295191		0.0586568	-0.0429345		0.0182563
26.94		0.0273697	0.0654809		0.0429346	-0.0105872	0.0297155		0.0121453	0.0109739	0.0302269	0.0175118	-0.035062	-0.0307779			0.0583616		-0.0133901		0.00409695		0.046044	0.0245752		-0.00226715
26.96		0.0376914	0.0770936		0.140301	-0.0714453	-0.0647168		0.0290291	0.00945827	0.0397145	0.0228067	-0.0431654	0.0205968			0.0444984		0.0211034		0.0642272		0.037963	0.0423322		0.0145737
26.98		-0.0203137	0.034481		0.0808551	-0.0137612	-0.00652767		0.00848545	0.00189676	0.00276635	-0.000524232	-0.0205269	0.0126406			-0.00709103		0.000395216		0.0531919		-0.050874	-0.0033617		0.0146649
27		0.0206901	0.064294		0.0600752	-0.0145037	0.0481181		0.0192359	0.0326243	0.0491923	-0.00905283	-0.00189199	0.0253236			-0.0242317		-0.00384959		-0.069605		0.0171257	-0.013386		0.0286267
27.02		-0.0336705	0.0278207		0.182271	-0.0642131	-0.0330947		0.0229456	0.0201377	0.0281702	-0.0304467	0.00172021	0.0114101			0.0505305		0.0108647		0.0302216		0.0145286	0.032658		0.0470399
27.04		0.0193014	0.0221811		0.148882	0.014413	-0.0223155		0.0338997	0.00820085	0.0439429	0.0622477	-0.0374463	0.00709945			0.0355205		-0.0421767		0.0567674		-0.018476	0.078298		0.0799773
27.06		-0.0052945	0.0194378		0.119496	0.0741819	0.0343972		0.0365565	0.0300412	0.0412266	-0.0311813	0.0119899	0.00807073			-0.0333228		-0.0230435		0.0445764		0.00292097	0.00799426		-0.013058
27.08		0.0390256	0.0207988		0.0572008	0.0568547	-0.0352904		0.0120657	0.0177389	0.0483587	0.0505869	0.0772636	0.0135033			0.0249684		0.0154061		0.0154877		-0.0111919	-0.0224574		-0.0229293
27.1		0.0129433	0.0103659		0.103338	0.0550953	-0.00773576		0.0219596	-0.00235733	0.0374058	0.0162331	-0.0244012	0.00852527			0.0440029		-0.00292177		0.0478691		-0.00521971	-0.0558787		-0.0755731
27.12		0.0156341	-0.000581859		0.215034	0.0710196	-0.0331116		0.0121706	0.0397517	0.0457335	-0.0097938	-0.00796774	0.0414713			-0.0347174		0.0110175		-0.0105057		0.019388	-0.015584		0.0549986
27.14		0.0600252	0.0417576		0.12022	0.0625386	-0.0501785		0.00846822	0.00563943	0.0336215	0.0756937	-0.0234596	0.00131738			0.00633485		0.00445429		0.030827		-0.00901059	0.0117431		0.0212213
27.16		0.0311231	0.0674804		0.12466	0.0909617	0.0100106		0.0293124	0.00883386	0.0037881	0.0223169	0.014049	0.0059327			-0.00950651		0.0240644		0.0336432		-0.0178027	-0.0194469		0.016813
27.18		0.0426027	0.0708915		0.0697042	-0.0370247	-0.0475766		-0.00888432	0.00900338	0.0110443	-0.0282805	0.0212314	0.0264637			-0.0257315		-0.0394486		0.0148896		-0.0471697	-0.0534611		0.0451306
27.2		0.0202969	0.0317845		0.0652107	0.0356258	0.00893793		0.0227885	0.0191558	0.0240413	0.0509413	0.0490801	0.0245823			0.0530273		-0.0428903		0.0127484		0.0363511	-0.0493226		0.0128159
27.22		0.0197452	0.030865		0.196	-0.0257674	0.0305925		0.012877	-0.00965759	0.0272275	-0.0361886	0.000405445	0.0125593			0.0152512		0.00531914		0.0264027		0.00594998	0.0231529		-0.0571109
27.24		0.00498399	0.0340814		0.137909	-0.0245401	-0.0247964		0.017918	0.0292189	-0.0106924	-0.0235641	-0.01165	0.0187922			0.0195974		-0.00348154		0.0449291		-0.0627689	0.00513281		-0.0243919
27.26		0.030402	0.0174242		0.101309	0.0377247	0.0021176		0.0240743	-0.012307	0.0200617	0.0551278	-0.00949576	0.0170817			0.0405903		-0.010598		0.0706302		-0.0202102	0.0011069		-0.0414811
27.28		0.0315226	0.0867136		0.0672072	-0.0685166	-0.0442342		0.0189828	0.0302589	0.0292427	0.0173646	0.0128004	-0.0171681			-0.00337748		0.00746874		0.0255242		-0.0214427	0.0057467		-0.0496083
27.3		-0.0154695	0.0410052		0.0830856	0.0664202	-0.0065641		0.00252252	-0.019397	0.0303147	0.0629782	-0.00580519	0.000765407			0.013088		0.0123685		-6.8065e-06		-0.00977601	0.00144462		0.0417506
27.32		0.0453318	0.0193141		0.0993323	0.00315901	-0.00573139		0.0242853	0.00108897	0.030209	0.033614	0.055699	0.0200868			-0.0427377		-0.0103174		0.0256404		-0.00527097	-0.0582562		0.00955159
27.34		0.023914	0.0219236		0.168407	0.0462412	-0.00850158		0.0394888	0.0196218	0.0329527	-0.0122166	0.0133633	-0.00107079			0.0351335		0.00225882		-0.034732		0.0218671	-0.000331395		-0.00989983
27.36		0.0190094	0.0468902		0.0931304	0.0352102	-0.0561934		0.021571	-0.00815529	0.042822	-0.0264188	0.00274325	-0.0416228			0.0638259		0.0200702		0.0249069		-0.0265756	0.0405007		0.0374779
27.38		0.0133182	0.0468439		0.114071	0.0358144	-0.00276992		0.0128739	0.0162217	0.0385812	-0.0259198	0.00174476	0.00437763			0.0433873		-0.031358		0.0110147		-0.0262041	0.0134845		-0.0314898
27.4		-0.0160096	0.0275581		0.203506	0.0630846	0.0087211		0.0121728	0.00969923	0.0146777	0.0616654	-0.069329	-0.00618492					0.013232		0.051757		0.00829676	0.0166483		0.0228617
27.42		-0.0235205	0.00820138		0.119719	0.0288698	-0.0276223		0.038548	-0.00505097	0.0268366	0.0414461	0.025816	-0.00169176					-0.0333431		0.0875762		0.05165	0.0136084		-0.00640762
27.44		0.00313839	0.067071		0.146147	0.0348777	0.00706292		0.0276434	-0.0384337	0.00780817	0.0320628	0.0241849	-0.0405996					0.0455125		0.0566989		-0.00500852	0.0682093		0.0157617
27.46		0.0303959	-0.000374901		0.11865	-0.00232615	-0.0266753		0.0267804	0.0394351	0.0184214	0.0542118	0.00382263	0.0335511					0.00884412		-0.00127697		0.0480514	-0.0304804		-0.00779958
27.48		0.0235547	0.0128338		0.113262	0.0183054	0.02689		0.0302831	-0.0219022	0.0202921	0.0490639	0.0151193	0.0505366					0.00916857		0.0282079		0.00163958	0.0192966		0.0331767
27.5		-0.0283339	-0.00111259		0.041311	-0.0578692	-0.0168715		0.0271035	-0.00209126	0.0299784	-0.00995345	0.0280214	0.0507811					-0.0137115		0.0134458		0.0385151	-0.00216927		0.0520404
27.52		-0.0111876	0.0876564		0.0884335	-0.0939485	0.00131941		0.00843852	-0.00748803	0.0300484	-0.0249256	0.0138338	0.0216417					-0.0256469		0.02248		-0.0262978	0.0660492		-0.0532884
27.54		0.0537171	0.0408605		0.103343	0.14157	-0.0220321		-0.00626776	-0.0229337	0.0347148	0.0584571	-0.0131778	0.00716276					0.0321903		0.059752		0.00839169	0.0272699		-0.0406976
27.56		0.0330609	0.0795922		0.0521678	0.037328	-0.0499854		0.0189758	-0.0257037	0.0399555	0.05087	-0.0102378	-0.046917					-0.000185758		0.00954382		0.00802176	0.0247911		-0.00255268
27.58		0.027971	0.0284051		0.154884	-0.0463327	-0.035425		0.0320086	0.0299173	-0.00406395	0.0386183	0.0184855	0.0284942					0.00710485		0.0540851		0.0456247	-0.0230654		0.0649417
27.6		-0.0355776	0.0952542		0.0346411	0.0117353	-0.0267409		0.0166603	0.0112916	0.050379	-0.0312631	0.0306343	0.00471027					-0.00649562		-0.0100905		0.00163627	0.0147737		-0.0383695
27.62		0.00233638	0.0445571		0.227034	0.00216146	0.00875361		0.0225743	-0.0224149	0.0391411	0.0323799	-0.0293555	-0.023231					-0.000106308		0.0727607		0.00838274	-0.0031722		-0.00335775
27.64		0.000923362	0.0173581		0.158146	0.0513355	-0.0430277		0.0399931	-0.0356974	0.01658	0.0551329	-0.0314575	0.0485251					-0.015925		0.0602366		0.0620009	0.0234078		0.0566646
27.66		-0.00356181	0.0330169		0.130233	-0.00655574	-0.0219408		0.0202656	0.0219016	0.0254663	0.0455503	0.0263646	-0.0134264					0.0149586		0.0690475		-0.0334978	0.0345476		-0.0192703
27.68		0.0168736	0.0506373		0.107585	0.0026868	-0.00027033		0.0316742	-0.0466114	0.0527384	-0.0110242	-0.00716531	0.0124938					-0.0181681		0.0218397		0.0697109	0.0417629		-0.0234663
27.7		0.0519941	0.0375382		0.106611	-0.0524246	0.0361591		0.0178094	0.00581591	0.0432925	-0.0255223	-0.00328748	0.0356262					-0.0175212		0.05907		-0.0157348	0.0674366		0.0318145
27.72		0.0500014	0.0219459		0.0775595	0.0412675	-0.00229942		0.0113686	0.0240208	0.0253571	-0.0133545	-0.0359393	0.0194208					0.0090449		0.0205237		0.0013973	-0.0116735		-0.0549409
27.74		-0.00459054	0.0369789		0.11106	0.0514856	0.00425147		0.0041126	0.0169626	0.0389878	0.0386536	0.0102219	0.00924426					0.00273267		0.0194454		0.0238377	0.0334474		-0.00909245
27.76		0.0579623	0.0599197		0.0569863	0.079401	-0.0481242		0.0166101	0.0264203	0.0436402	0.029442	-0.026792	-0.032248					0.00775183		0.065497		0.0595244	-0.0698823		0.00412354
27.78		0.0015124	0.0193769		0.11435	-0.0127825	0.0128186		0.0290853	-0.00215405	0.0379194	-0.0504582	-0.00939475	-0.0258677					-0.0517369		-0.0103006		0.022575	-0.00079278		0.0193713
27.8		-0.0441462	0.0560391		0.0876681	-0.0220855	-0.0476648		0.0216501	0.0260423	0.0282873	0.0446335	-0.0242866	-0.0130767					0.00746872		0.0737916		0.0665145	0.0552011		0.00179138
27.82		-0.00137236	0.0720324		0.0752694	0.0133406	0.00124268		0.028857	-0.00509269	0.018775	-0.0284154	0.0238617	0.0287221					0.0321957		0.00378248		-0.0472149	0.0204127		-0.0151057
27.84		0.0256264	0.000924887		0.100668	-0.0188806	-0.0260061		0.0486212	-0.0224556	0.00850592	-0.0034166	-0.000183515	-0.0153728					-0.00546873		0.0313528		0.0836155	-0.0480046		-0.0739026
27.86		0.0915369	0.0343575		0.119174	0.0182317	-0.0195651		0.0254358	0.0243835	0.034504	2.16512e-05	-0.0214198	0.0277281					0.0165812		0.0231865		-0.027395	0.0261489		-0.0286691
27.88		0.0471263	0.00873718		0.0457395	-0.0604275	0.0347583		0.0019083	0.0375698	0.0458401	-0.0518855	0.0204336	0.0303074					-0.0171629		0.0166313		-0.00217421	0.00527033		-0.0433906
27.9		0.00667881	0.025586		0.137886	-0.0627934	0.000529806		0.0105564	-0.0159176	0.00775394	0.00759347	0.0629489	-0.0358724					0.0238273		0.0538331		0.057174	-0.00242259		-0.000393856
27.92		0.01491	0.00907443		0.0830936	-0.0357569	-0.0050615		0.0182947	0.0296313	0.00529405	0.0429479	-0.00780438	0.00931124					0.00960665		0.0585052		-0.0162168	-0.0255071		-0.000306798
27.94		0.0299568	0.00740892		0.0380275	0.107247	-0.00829006		0.034554	0.0236683	0.024173	0.0754161	0.0442035	0.0217308					-0.00276086		0.0160699		-0.024236	0.0461787		0.0412986
27.96		0.0402511	0.0564979		0.126366	-0.0853561	0.00155094		0.0306812	0.027966	0.0791237	0.0360769	0.0402102	-0.00502857					0.0209512		-0.0350012		0.0170324	0.0440015		0.00559075
27.98		0.0372539	0.0723248		0.0530859	-0.0485885	-0.0443724		0.0106034	-0.0157144	0.0337421	0.0705239	0.022046	-0.0165712					0.0160371		0.0231727		0.0188133	0.0112086		0.023324
28		0.033175	0.00680843		0.0411772	-0.0440653	-0.00422851		0.0176504	0.0166248	0.044716	-0.017353	0.0520259	-6.31374e-05					0.0182885		-0.0505049		0.00201714	0.0295155		-0.0230844
28.02		-0.0316225	0.0176976		-0.00916428	0.0153722	0.00616664		0.00508838	-0.0320468	0.0257473	0.0421751	-0.0460241	0.0420494					-0.00812451		0.0394492		0.00085123	0.0220201		-0.0258952
28.04		0.0209854	0.0210234		0.00627594	0.00580629	-0.0151328		0.0360484	0.00709554	0.0371459	-0.0101337	-0.0037592	0.0114553					0.0473981		0.0785007		-0.00652067	0.00230422		0.0423281
28.06		0.0546821	0.0494367		0.0432789	0.0473305	0.0328583		0.0276094	-0.0370683	-0.0110281	0.0433328	0.04108	0.0533677					-0.011979		0.0453582		0.0295393	-0.0125352		-0.0671815
28.08		-0.0106097	0.023635		0.0571895	0.0457119	-0.0285109		0.0118381	0.000374712	0.00971931	0.0152171	-0.024079	0.0110443					0.0220735		0.0275627		0.0126853	-0.0050056		-0.00708179
28.1		0.0204006	0.064617		0.0623068	0.0612938	-0.0553321		0.0090112	0.0218053	0.0455822	-0.0235248	-0.0367179	0.00996459					0.0171999		0.0447534		0.0583992	0.0126556		0.0109584
28.12		-0.0789557	0.0495291		0.0964636	-0.0289518	0.00161211		0.0212176	0.00798369	0.0277562	0.00800307	-0.0203451	0.0328468					-0.0199061		-0.00141597		0.017476	0.021993		0.0166389
28.14		0.0687021	0.00966334		0.0465779	0.00819597	-0.0175769		-0.0114883	-0.016271	0.0163433	-0.028394	-0.0109681	0.000428439					-0.01648		-0.000395851		0.0132416	-0.0247279		-0.0311546
28.16		-0.0239201	0.0197106		0.0916099	0.0620963	0.000198026		-0.0107496	0.00471382	0.023986	0.0387021	0.0549595	-0.00671394					0.0278445		0.0368882		0.0504478	-0.0210717		-0.0223768
28.18		-0.00211777	0.00983336		0.0831572	0.00977453	-0.0250534		0.0299087	-0.00135378	0.031874	0.0554477	-0.0304974	-0.0190252					-0.0191705		-0.00525826		0.0400291	-0.00718863		0.0705068
28.2		0.0221642	0.0499477		0.1106	0.000584488	0.00651642		-0.0102753	-0.0202263	0.0230054	0.0073846	-0.0204256	0.0317823					0.0199344		0.0267066		0.0387695	0.0321244		-0.0142489
28.22		0.0471435	0.0284111		0.0601308	-0.0939923	-0.0745197		0.0401562	-0.0128661	0.0328658	0.0118694	0.0701812	0.00124882					0.00734406		0.0186666		0.0149554	0.0565382		0.00555158
28.24		0.0349973	0.0542102		0.0260932	0.018034	0.0136947		0.000564482	-0.00397079	-0.0120586	-0.0011753	-0.0361941	0.0223322					-0.00404373		0.103728		-0.0371178	-0.00638649		0.00370423
28.26		0.0159984	0.0457895		0.108729	-0.0204906	-0.0144517		0.0100903	0.0271902	0.015029	-0.0143516	-0.00904372	-0.0412693					0.00833049		0.0471003		0.0287578	0.00823213		0.032807
28.28		-0.0055734	0.0381523		0.0693982	0.0881378	-0.0416543		0.00344331	-0.00500429	0.0454473	-0.0388164	-0.00842273	-0.0204459					0.0217829		0.00462917		0.013548	0.00409998		0.00709313
28.3		-0.0223321	0.00672717		0.115621	0.0390165	-0.0139316		0.0178942	-0.00085563	0.0336428	0.00886438	-0.0707866	-0.0284769					0.00951124		0.0135041		0.0510073	0.0295753		0.0225634
28.32		0.00686571	0.0102187		0.141235	-0.0814944	-0.00924694		0.0272613	0.00132398	-0.00673255	-0.0245591	-0.0178394	0.0350055					-0.0394109		0.0423211		0.0428805	0.0672441		-0.0495291
28.34		0.06686	0.0634101		0.0641005	-0.0645509	-0.00444648		0.00276954	0.0133611	0.0130404	0.0364529	0.0660777	-0.0268013					0.0059124		-0.00333045		-0.00516478	0.0134867		0.00720369
28.36		0.00175092	0.0218716		0.0531626	0.000611382	-0.0304502		0.0118891	-0.010833	0.0120425	0.0646267	0.0251516	0.0186578					-0.00573611		0.00919608		-0.0133817	0.0567954		0.00383113
28.38		-0.00777461	0.0531146		0.0049194	-0.017528	-0.0690482		0.0083072	0.00454088	0.0394521	-0.00735984	0.0122027	0.0141608					0.00154791		-0.0165934		0.00897911	0.0270369		0.00184406
28.4		0.0609575	0.0493022		0.0240415	0.0786667	0.0480152		0.0151835	0.00670045	0.0430082	0.0222253	0.0119071	-0.0304171					0.017115		0.051886		0.0850018	0.00537967		-0.0524343
28.42		-0.0248055	0.0155267		0.0905399	0.109256	-0.00306903		0.0127343	-0.00572407	0.0400847	-0.0316579	0.00664104	0.0480534					0.00115095		0.0445612		0.0921141	0.0143889		-0.00349806
28.44		0.0169186	0.0315938		0.0415617	-0.0857887	-0.0107577		0.0111395	0.000447364	-0.000319766	-0.0343025	-0.043701	0.0222293					0.0214727		0.021401		0.0443963	0.0299442		-0.00141964
28.46		0.0547798	0.0398665		0.0801187	0.0295017	0.0372521		0.00905283	0.0249517	0.0162168	0.0260968	0.0284784	-0.0279883					-0.0188636		0.0251124		0.00448769	0.0128006		-0.0507638
28.48		0.0426557	0.0214873		0.0834332	-0.0212625	-0.0517824		0.0258483	0.0497006	0.00813139	0.0659896	0.0260894	0.0164918					0.017654		0.0149464		0.0639357	-0.0325493		-0.0525409
28.5		-0.0474136	0.0196301		0.137503	0.103309	-0.0485205		0.00672701	-0.0279194	0.0374307	-0.00775059	-0.00787774	-0.0437797			-0.00130785		-0.0317402		-0.00805965		0.0159851	-0.00245509		-0.0387221
28.52		-0.00527413	0.0419402		0.149003	-0.0466307	-0.0159643		0.0243161	0.0374034	-0.000754922	-0.00581788	-0.00337294	-0.0416056			0.0172574		0.00597605		0.0820844		0.0267078	0.0138627		-0.0175873
28.54		0.0269174	0.033461		0.0541078	-0.0312026	-0.0143399		0.00430937	-0.0288687	0.0667518	0.0408092	0.0287662	0.0340501			0.0109402		0.00878785		0.0771388		0.0542637	-0.021094		-0.0754367
28.56		-0.0128363	0.100287		0.0462776	-0.00410415	0.0300867		0.0503248	0.0366865	0.0505691	0.00692369	0.016271	0.00988233			-0.0190133		0.0131264		0.00730439		0.0821656	-0.0254633		0.00855851
28.58		0.0218653	0.0553608		0.127286	0.0948778	0.0120239		0.0179056	-0.00328582	0.0462549	0.0257885	0.00952691	0.0154873			-0.048193		-0.0251606		0.0994818		0.0178863	-0.0526983		0.0481252
28.6		-0.0159167	0.0258637		0.0437159	0.0442291	0.0470188		0.00684381	0.0115416	0.0259606	0.0145421	0.0545379	0.0384441			-0.10879		0.00754743		0.00197384		0.00533784	0.0387522		-0.0236432
28.62		0.0566803	0.0325382		0.0437372	0.0152772	0.0130459		0.0150741	-0.00778693	0.0391516	0.0162561	-0.00675904	0.0291843			-0.0358541		-0.00489533		-0.0249724		0.101885	-0.0637846		-0.0680188
28.64		0.0311642	0.00520147		0.010468	0.0271279	-0.037431		0.00979627	0.00480506	0.0674585	0.064787	0.0135339	-0.00816203			-0.0588549		0.00424985		0.0344215		0.0310125	-0.0151174		0.0393363
28.66		-0.0223786	0.0803208		0.104014	0.110225	0.00410401		0.0282572	-0.0219612	0.0252668	0.00397501	-0.00678101	0.0106964			-0.0672922		-0.0401991		0.0453668		0.0502913	0.00934096		0.0274163
28.68		0.0243055	0.0529619		0.126294	0.11445	0.00432838		0.00664605	0.0210248	0.0481534	0.0174253	-0.0294546	-0.00682944			-0.0370652		0.0291754		0.0559531		-0.0322626	0.0305252		0.00506725
28.7		0.0100613	0.0812266		0.100778	0.0215811	-0.0370472		0.00620543	0.00452542	0.0232664	-0.0168385	0.00132483	0.0109307			-0.0747358		0.0181372		0.0148106		0.0259266	0.0434797		-0.0280761
28.72		-0.0119726	0.0813677		0.141123	0.0185893	-0.0035243		0.00429593	0.0292562	0.0484627	0.077002	0.0126456	-0.00166493			-0.000801269		-0.033179		0.0641894		0.0226288	0.0643149		0.0144461
28.74		0.0203203	0.0178407		0.061397	0.0907993	0.00537662		0.012765	0.0159236	0.0661879	0.071647	-0.0225634	-0.015836			0.0341447		0.012085		0.0182178		0.065774	0.0271463		0.0664899
28.76		0.015372	0.0407142		0.105386	0.0582836	0.00527914		-0.0230569	-0.0137396	-0.00272439	-0.0425419	0.00301079	-0.00753117			0.00550259		0.00190489		0.01446		0.0468342	0.00195773		0.0142748
28.78		0.0706029	0.0245012		0.121542	0.0530675	0.00741362		0.0248256	-0.0223853	0.0228526	-0.00107583	0.0285331	-0.0271961			-0.0127326		-0.0175059		0.0356304		0.119116	-0.00266363		0.0283562
28.8		0.0976128	0.0385522		0.0175809	-0.0211758	-0.000429848		0.0172047	-0.00989451	0.00399845	-0.0302953	-0.0404125	-0.0245066			0.00349119		-0.0122633		-0.013738		0.0521305	-0.00603845		0.0012053
28.82		-0.0286277	0.0591373		0.0486855	0.107286	-0.0263458		0.00996515	-0.0429775	0.0301822	-0.0255633	-0.0222605	0.0396003			0.0613245		-0.0256605		0.0165548		0.0685255	0.0291578		0.0144421
28.84		-0.0360658	0.0195792		0.0768779	0.063608	-0.0362481		-0.000491532	-0.00224662	0.0115758	0.0438249	-0.0115342	-0.00309596			-0.0162767		-0.020992		-0.00361345		0.0503209	0.00691559		-0.00659003
28.86		0.00846737	0.0102855		0.000734959	-0.0093453	-0.0134943		0.0273236	-0.0309225	0.0294729	-0.0289174	-0.00355263	0.0262622			-0.0567106		0.00670158		0.0603626		-0.0143548	0.0111487		0.000721963
28.88		0.00211429	-0.00212945		0.0948752	0.0643557	-0.0252376		-0.00909779	0.00451001	0.0264716	-0.0222168	-0.030049	-0.0604067			-0.0353392		0.0371461		-0.0212877		0.0848732	-0.0012611		0.0106144
28.9		-0.0346509	0.0668301		0.0281134	0.00970034	-0.0360052		0.0182332	-0.0286901	0.0539037	0.00887792	0.0552387	-0.00726903			-0.0164252		-0.0182496		0.0548854		0.0267041	-0.0315403		-0.00964417
28.92		-0.0214028	0.0379349		0.0942898	-0.0612733	-0.0148125		0.0200787	0.0306252	0.0165838	0.0867439	-0.0418879	-0.00389626			-0.0316051		0.00584627		0.0946844		0.0199044	0.0176913		0.0240987
28.94		0.0857111	0.0531851		0.112952	-0.0838491	0.036473		0.00468224	0.00367101	0.048218	-0.0192795	0.0197637	-0.026434			0.00674932		-0.0274821		-0.0286592		-0.0126426	0.0310402		-0.0136654
28.96		0.0707705	0.0262509		0.00649961	-0.0386002	-0.0348407		0.0264801	0.01851	0.0318313	0.0490151	0.0250401	0.0138124			-0.0796537		-0.00315791		-0.0051641		0.0528938	-0.00276265		-0.0088244
28.98		0.0292768	0.00346679		0.0974679	0.0515045	0.0269367		-0.00180435	0.0233259	0.0162086	0.00117092	0.0412545	0.0275512			0.0366549		-0.0207004		0.00334434		-0.00716084	0.00759112		-0.0300399
29		0.0231331	0.0664764		0.108042	-0.0393167	0.016076		0.0174369	0.0247279	0.0624942	-0.0219216	-0.0238099	-0.0327185			-0.0030509		-0.00279899		0.0328724		0.0350669	0.0191107		-0.0476128
29.02		-0.00147363	0.0219722		0.0567517	0.0096959	0.0195172		0.0095766	0.0464114	0.0407537	0.0571879	0.00225677	0.00782622			0.0112064		0.00898636		-0.00925852		-0.0060488	0.00464751		-0.0517
29.04		0.0112068	0.00850356		0.108634	0.0149995	-0.00875021		-0.0231024	-0.0146292	0.00991405	-0.0198526	0.0118029	0.0025234			-0.0050219		0.0252902		0.00689258		0.0328892	-0.0537184		0.0590333
29.06		-0.0414954	0.0637118		0.119486	-0.0167388	-0.0160047		0.00847725	-0.00737383	0.0573578	0.0326582	-0.0375674	-0.0173121			-0.033434		0.0341885		0.0314222		0.0374559	0.0414485		-0.0370089
29.08		-0.0113833	0.0404474		0.0944874	0.00297265	-0.0455487		-0.00047354	0.0251771	0.00890446	0.00161175	-0.0149685	-0.00715098			-0.049482		0.0206672		0.0416419		0.0215443	0.0510574		0.00406798
29.1		0.0303139	0.0364619		0.0200988	0.0368993	-0.0426549		0.0100566	0.0136888	0.00985199	0.0550571	-0.0361664	-0.0321253			-0.0680213		-0.0222014		0.0471072		-0.00334066	-0.0335886		0.0642561
29.12		0.0276657	0.018758		0.0677026	0.074083	0.0271971		0.00127559	0.00985675	0.0418033	-0.0249327	0.0256561	-0.0151576			0.00305584		-0.0230934		0.0443864		0.0609584	-0.0046656		-0.00137528
29.14		-0.0450436	0.050348		0.00244171	0.0676168	-0.00131459		0.0135915	0.03195	0.0114578	0.0409887	-0.00802406	-0.0128108			0.0168899		-0.0156462		-0.0211418		0.034034	0.00173935		0.00601704
29.16		0.0298577	0.0539988		0.127914	0.028868	-0.0226854		0.00408171	-0.0160866	0.045346	0.0108727	-0.00829266	0.0285687			0.00411815		-0.00283834		0.0150389		-0.00413662	0.0515817		0.00421546
29.18		0.0369228	0.0323361		0.136034	0.0710151	0.0235255		0.029675	-0.00561799	-0.00352162	0.0102285	-0.00962833	-0.00831046			0.047257		0.0179482		-0.0208602		0.019474	-0.0172133		-0.0343754
29.2		0.0381339	0.0395112		0.0282548	-0.0586401	0.0283684		0.00525612	-0.00714218	0.0144567	0.00946928	-0.000386316	0.00309631			-0.00409382		0.00226904		0.00624564		0.00466758	0.0205871		0.0198991
29.22		0.0737715	0.0570964		0.103867	-0.0374159	-0.0375905		0.0191352	0.0227826	0.0301184	-0.0135102	0.0631306	-0.0103943			0.0519538		-0.0496405		0.041742		0.0155765	0.0185983		0.0473742
29.24		0.0103866	0.0901629		0.058806	0.0142589	-0.00534048		0.0238257	-0.0188316	0.00838264	-0.0160937	0.00955307	0.0235304			-0.000566358		0.0115778		-0.000763163		0.0245545	0.0382755		-0.0276848
29.26		0.0234721	0.0266255		0.130391	0.00549621	-0.000300318		0.0219008	-0.00479011	0.0370102	-0.0384768	-0.0233401	-0.00377485			-0.00651586		-0.00492427		0.0107183		0.0224031	0.020826		0.00682407
29.28		-0.00516853	0.0254799		0.0495674	0.0872655	0.010594		0.0023305	-0.00395227	0.0214654	0.0319091	0.0441794	-0.00189952			-0.00673736		0.00350113		0.0584252		0.00884184	-0.0413953		-0.0184901
29.3		0.0132952	0.0126627		0.0846912	-0.0483061	-0.021915		-0.00772158	-0.00353389	0.0326888	0.0534794	0.0361605	0.0320275			-0.0234337		-0.0121121		0.0188191		-0.00338806	0.0301789		0.0330272
29.32		-0.0273838	0.0223209		0.118001	-0.0493165	0.0110388		0.00861507	0.0200405	0.0305096	-0.00391899	0.021161	-0.0264837			-0.00633639		-0.0553855		0.0329809		-0.0182105	-0.0042248		0.0351236
29.34		0.012551	0.0267775		0.119582	0.012916	-0.0246156		0.0219364	0.00901639	0.0214848	-0.014825	-0.0272411	-0.0244122			0.0280403		0.0293131		0.0810809		0.0858073	-0.0280985		-0.0122156
29.36		0.00435842	0.0450767		0.0688039	-0.0808361	-0.0310979		-0.00529301	0.00936863	0.0503081	-0.0347345	0.0311914	-0.00642341			-0.0526145		-0.0358095		-0.0180901		0.0527685	-0.00652525		0.00876943
29.38		-0.00753447	0.0911928		0.137902	0.0212315	-0.0473643		0.00325706	0.0151359	0.00201747	0.0391827	-0.00255812	-0.0082735			-0.0293308		-0.00485454		0.00719466		0.0341855	-0.0158781		-0.00452813
29.4		0.036579	0.0787542		0.136931	0.00551144	-0.00757959		0.0175862	0.0419259	0.0246329	0.0499264	-0.00859848	-0.00377438			-0.0285942		-0.0264613		0.0042819		-0.0017036	0.0218048		-0.0208887
29.42		-0.00205498	0.0315298		0.110744	0.0383392	-0.00906888		0.00995242	-0.00981565	0.020627	0.0115598	0.0387093	0.00441281			0.0394337		-0.0375783		0.0405826		-0.00554473	-0.00432913		0.0202379
29.44		0.0189164	0.0033809		0.0755271	0.0246834	0.0118371		0.00266174	-0.00894375	0.0341921	0.0121235	0.00218373	-0.00634155			0.0214862		0.0330892		0.0235036		0.00505125	-0.00909246		0.0241836
29.46		-0.0218837	-0.019621		0.0518589	0.0412625	-0.00480891		0.0176518	-0.00112076	0.0209685	-0.0159706	0.00912787	0.022163			-0.0051706		-0.0158807		0.0701757		-0.00983598	-0.0499229		0.0306026
29.48		-0.00156496	0.0478707		0.0833878	0.0540107	-0.0182023		0.0132104	-0.0154498	0.00221731	-0.0426514	-0.0205773	-0.00691773			-0.0499098		0.0145431		0.0142228		0.0660542	0.0398911		-0.0154182
29.5		0.0647921	0.0179325		0.0596275	-0.051234	0.0360191		0.0193664	-0.0295903	0.0363082	0.00153378	0.00326224	0.0104667			0.0142388		0.0252659		-0.0420494		-0.0372012	-0.0625208		-0.0635649
29.52		0.0489466	-0.00793524		0.0402944	-0.0236172	0.0466265		0.0167846	-0.0232119	0.0296921	0.00191949	0.0373304	-0.0630739			0.0348978		-0.00374232		0.0823982		-0.0337624	0.0101916		0.00780269
29.54		0.0330465	0.0271064		0.0366272	0.0395005	-0.027727		0.0101401	-0.0193373	0.0329048	-0.014783	-0.0027459	-0.01285			0.000110638		-0.00992277		0.0370284		0.0797216	0.00558418		0.0308866
29.56		-0.0102328	0.0575288		0.0273973	0.0476735	0.00014993		0.0211023	-0.0242866	0.0236008	-0.0151709	-0.0188892	-0.00187708			-0.0570534		0.00370932		0.0412383		0.0292965	0.0256271		-0.0142778
29.58		-0.0136764	0.058998		0.0749343	-0.0111008	-0.0270436		0.0205095	-0.0289615	0.0271358	0.0480709	0.00876329	0.011444			0.0459299		-0.00803339		0.0576007		0.00637947	0.000574443		-0.0151776
29.6		0.0290696	0.0382437		0.0240902	0.0934357	0.000879243		0.0074069	0.0334561	0.00301415	-0.0099498	0.0248681	-0.00610105			0.0197803		0.00608906		0.027699		-0.014292	0.011497		0.0126975
29.62		0.0417852	0.0551944		0.0699109	-0.0108233	-0.0239517		0.0237947	0.00982652	0.0439247	0.0271797	0.0339027	-0.0336456			-0.0196593		-0.0281395		0.0428697		0.0279172	-0.00392637		0.0089279
29.64		-0.0317019	0.0258909		0.230866	-0.0821346	0.0239265		0.0248204	0.015224	0.0290537	0.0473254	0.0381038	0.029619			-0.0519487		0.0349188		0.0900238		-0.00651829	-0.00154396		-0.00858019
29.66		-0.0132415	0.0564224		0.0667068	-0.0127765	0.0195326		0.00718973	-0.0105022	0.0222369	0.0314933	-0.0701446	0.00738237			-0.0615749		-0.026976		0.0206645		0.0308426	0.00188494		0.00452632
29.68		-0.0438892	0.0394336		0.0724873	0.0394961	-0.0217421		-0.00431318	-0.000791178	0.019425	0.0718699	-0.00501708	-0.00626848			-0.0163321		0.0374004		0.0387818		0.0776708	-0.00901021		-0.00105909
29.7		-0.000704302	0.0240902		0.0287849	0.0720264	-0.0495082		0.00818455	-0.0109128	0.0201424	-0.0302171	-0.0307976	-0.0191842			-0.0173828		0.0344364		0.00552384		-0.0218935	0.0261406		0.0200516
29.72		0.0179998	0.0124392		0.0615235	0.0482011	-0.0243018		0.00681844	-0.0245279	0.00659328	0.00727924	-0.00690212	-0.00343336			-0.00724936		0.00927511		-0.0185854		0.102967	0.0813428		-0.00639302
29.74		-0.00221151	0.00225269		0.0934639	0.010055	0.00402428		-0.00444369	0.00832741	0.0409375	-0.0141398	-0.0112105	0.0290279			-0.00152923		-0.00221302		0.0356353		0.0625739	0.0015975		0.0458564
29.76		0.0193195	0.0454763		0.126631	0.0340352	-0.0326479		0.0103909	-0.00347982	0.0364027	-0.0124871	0.0237409	-0.0130293			-0.014447		0.0117944		-0.0067714		0.0256682	-0.0539468		-0.0387921
29.78		0.0285202	0.0713979		0.133299	0.059908	-0.029999		0.0229787	-0.00699944	0.0274973	-0.00520346	0.0383308	0.0415157			0.0293846		-0.000999318		0.0247369		0.0320516	0.0241357		-0.0118651
29.8		0.0385178	-0.009289		0.165791	0.0141588	-0.0328445		0.0366069	0.000526375	0.0253955	-0.0518892	0.0338114	0.00654966			-0.0781718		0.00221878		0.0402522		0.0172447	0.0159492		0.0650359
29.82		0.0422734	0.0566084		0.0347724	-0.0230359	-0.000386789		0.0279818	-0.0166054	0.0493938	0.0228497	0.0618707	-0.0297997			-0.00142444		-0.0301338		0.0042753		0.00446815	0.0621992		0.036807
29.84		0.0104003	0.017441		0.0104166	0.0151932	-0.0357094		0.0265114	-0.0112196	0.010963	0.0129077	0.0350897	-0.0207226			-0.0739596		0.030222		0.0753336		0.0100776	0.0216366		-0.0304839
29.86		0.0231867	0.0205742		0.049819	0.0348102	-0.0384752		0.013878	-0.0278461	0.0242014	0.029751	0.00892537	-0.0367888			-0.0106361		-0.0207603		0.00138298		-0.0150238	-0.0189841		-0.00216926
29.88		0.0523585	0.0541967		0.0705601	0.0321735	-0.0333324		0.000196383	-0.00667352	0.0432708	0.0546105	0.0952131	-0.0407799			0.0200279		-0.024172		-0.00160275		0.0463668	0.0129767		0.0424754
29.9		-0.0139135	0.0351038		0.0375764	-0.0451816	-0.0218468		0.012882	0.0170719	0.0316476	-0.00506463	-0.0423962	0.0315271			-0.0872712		0.00626407		0.00909313		-0.00310965	-0.00528899		-0.0499108
29.92		0.0111489	-0.010791		0.131119	0.055246	-0.0212352		0.0263355	0.00738854	0.028344	0.0308673	-0.0125068	-0.0098782			0.0506149		0.00528562		-0.0200888		0.00240864	-0.00912564		-0.0223982
29.94		-0.0029067	0.0525302		0.0656589	-0.0269616	8.31777e-05		0.012878	-0.02514	0.00600553	0.0033054	-0.019359	0.0257952			-0.0348481		-0.000336278		0.00196786		-0.0176134	0.044392		-0.00222502
29.96		0.0188044	0.0544676		0.124096	0.0210635	-0.0123794		0.0202172	-0.0182577	0.0206131	-0.0131097	-0.0434767	0.0252119			-0.00160064		0.0448342		0.123907		0.0184743	0.0814302		0.0235187
29.98		-0.000927095	0.0379091		0.0255526	-0.0428208	-0.0128576		0.010146	-0.00867332	0.0521828	-0.0224732	-0.0347229	0.0175628			-0.10368		0.0195435		0.0184911		0.0203987	0.0188968		-0.0116645
30		0.0129495	0.0203882		0.114151	0.0850765	-0.0412484		0.00310405	0.0089998	-0.00469393	-0.0147424	-0.0300436	0.0571207			-0.0187347		-0.0458108		-0.012977		0.0516321	0.00525114		0.00479432
30.02		-0.0112677	0.047351		0.0309324	-0.104505	0.00855164		0.00532638	0.00966701	0.0240924	0.0240414	0.0188042	-0.00693959			-0.0893596		0.00688162		0.0186299		0.0472828	-0.0474597		-0.0775941
30.04		-0.0260469	0.0732333		0.0583682	-0.0139795	0.0176847		0.00525614	0.0154519	0.0244852	-0.0205799	-0.0101991	0.0324259			-0.00145043		-0.0236951		0.0573585		0.0167827	-0.0430171		0.0508748
30.06		0.00438368	0.0371518		0.0522378	0.00856006	-0.0292152		0.00487366	-0.0144131	0.00102461	0.0154295	-0.0216724	-0.0178279			0.0336864		-0.00105126		0.0560768		0.00211451	0.03671		0.0308382
30.08		0.0143222	-0.00145604		0.0554224	-0.0636007	-0.0297324		0.0204649	-0.013206	-0.00928697	0.0686983	0.00761368	-0.0165882			-0.00711049		-0.016301		0.0176467		0.0265737	-0.0152796		-0.0134612
30.1		0.00679307	0.0242429		0.0684815	-0.0253201	-0.0049231		0.0258716	0.00133336	0.0475012	0.0181344	0.002667	0.0171082			0.0157455		0.0243811		-0.00541473		0.0351896	-0.0349342		-0.00906934
30.12		-0.0603779	0.0481826		0.0413843	0.129381	0.0127449		-0.0117348	0.0196701	0.0376239	0.000144041	0.00636539	-0.0107489			-0.0108396		-0.0161013		0.00588641		0.0409305	0.0112846		-0.0572151
30.14		-0.0338141	0.0431019		0.0144075	0.0367325	0.0230009		0.0270198	-0.00514525	0.0475582	-0.0459959	0.0517338	-0.00825307			-0.027793		-0.0380955		0.0812074		0.0469491	-0.0429519		-0.0132373
30.16		-0.0133283	0.0359061		0.11898	0.0744029	-0.0131605		0.00373405	0.00147978	-0.0101872	0.0911517	0.060137	-0.000526004			-0.0297163		-0.0101634		0.00185282		0.00182136	-0.0262212		0.0451109
30.18		-0.0406624	0.0374633		0.0612652	0.00193167	-0.0316797		0.00996739	0.0267869	0.020527	0.0162813	-0.0307111	0.040594			0.0108592		0.0231963		-0.0229615		-0.0189275	-0.00754806		-0.00818257
30.2		0.0673953	0.0134568		0.0647305	0.103222	-0.0156819		0.015213	-0.00568711	0.0356965	0.0563876	0.0347743	0.0184511			-0.0982389		0.0119167		0.0425479		-0.016787	0.0353688		-0.020325
30.22		0.0144542	-0.0138384		0.139485	-0.0265788	-0.0100043		0.0155965	-0.00973319	0.0312465	-0.0328583	0.0100954	-0.0134389			-0.00957708		-0.0317209		0.0344581		0.0146729	0.00444198		0.0043804
30.24		0.00660718	0.0428624		-0.000672552	-0.0924567	-0.0124537		0.00635748	-0.00253904	0.0506807	0.0744077	-0.05395	0.0405227			-0.0846485		-0.0112095		0.0629637		-0.0206745	0.000505074		0.0670691
30.26		0.0184835	0.0237553			-0.0207723	-0.0556075		0.0125434	-0.0122946	-0.00639432	-0.0138735	-0.0932701	0.0197266			-0.108467		0.0554266		0.0512808		0.0045894	0.00223351		-0.0439187
30.28		-0.0049786	0.0325843		0.135138	-0.0568853	-0.00966096		-0.00087268	-0.0205674	0.0303403	-0.0144576	-0.0142906	-0.0301402			-0.0359116		0.0242806		0.067822		0.0419631	-0.0250574		-0.00379901
30.3		-0.0173773	-0.0223801		0.109065	-0.0366877	-0.0182791		0.00257469	0.0259623	0.0383403	-0.0322918	-0.00436974	0.0291084			-0.0612171		0.0261183		0.0350874		0.0228684	0.040732		-0.0529473
30.32		-0.0279887	0.0161742		0.1264	-0.0301616	0.0304583		0.0221469	-0.00786542	0.0216535	0.00208819	0.0109588	-0.0488377			-0.035119		-0.00889227		-0.0159736		0.033996	-0.00173225		-0.0615384
30.34		0.0349309	0.0495725		0.0442517	-0.0471733	0.0235057		0.0323493	-0.0184897	0.0165123	0.00241308	-0.00105711	-0.0397112			-0.00726881		0.0138662		0.0410649		0.0237019	-0.0183862		-0.0307712
30.36		-0.0138163	0.0336885		0.115821	-0.111286	-0.0433417		0.00704166	-0.00372313	0.0280248	-0.0273899	0.00994058	0.0264556			0.00783847		-0.0209182		0.0185114		0.0970977	-0.00315575		-0.0166653
30.38		-0.0382343	0.0412708		0.0292535	0.0460006	-0.0251996		0.0172812	0.0282268	0.0289293	-0.0239682	0.0427044	-0.0318385			0.00171758		-0.00401723		0.0318092		0.0190048	-0.00868881		-0.0531203
30.4		-0.000190324	0.0524832		0.105839	0.0563576	0.0057397		0.0047901	0.0309952	0.0277611	-0.00278573	0.0277217	0.0437723			-0.00792043		-0.00581431		0.0146643		0.00344785	0.00421899		-0.00383581
30.42		-0.0294437	0.0215044		0.0747464	-0.0475534	0.00163176		0.0141368	-0.00621777	0.0242786	0.0703386	-0.0039712	-0.00137643			-0.0174069		-0.0295728		-0.0396759		0.0392991	0.0309896		0.00945697
30.44		0.0203882	0.0154508		-0.0102291	0.0564078	0.0112486		-0.00251625	-0.0108182	0.0224589	0.0559018	0.0313715	0.00131371			0.0317267		-0.010666		0.0432303		-0.0131209	0.0458163		-0.0307059
30.46		0.0133679	0.0492952		0.0722147	0.0564893	-0.00886731		0.0101874	0.00252505	0.0516035	0.00872509	0.00738281	0.0259101			-0.00636208		0.0274069		0.0421629		-0.0106101	0.0145005		-0.0323667
30.48		-0.0127257	0.0305129		0.0782439	0.00590392	-0.0169044		0.0336766	-0.0385035	0.0214822	0.0441728	-0.0227064	0.0187134			-0.0642275		-0.0110695		0.0178065		-0.00210029	0.0475969		-0.00747846
30.5		-0.00124414	0.0395396		0.126869	-0.0548483	0.0467832		0.00930087	-0.0109611	0.0143479	0.0479634	0.0159214	-0.00191804			0.0190031		-0.00611591		0.0414625		0.0301282	0.0477942		-0.0281282
30.52		-0.0200686	0.0458457		0.0904707	0.0582829	-0.00506076		0.0145308	-0.0147361	-0.0101624	0.00514193	-0.0353202	-0.00918267			0.0119574		0.0694772		-0.0157439		0.0548123	0.0329201		-0.0115795
30.54		0.0101048	0.0361628		0.0838777	-0.09873	0.0253925		0.00256843	-0.00716104	0.0218858	0.0633598	-0.00604726	0.00555068			-0.000859351		0.0256317		0.0918172		0.0249051	0.00779447		0.0258858
30.56		-0.0409402	-0.00815538		0.0761515	0.16044	-0.0402162		0.0268321	-0.00147629	0.0168818	-0.0207312	0.00618893	0.0218799			-0.0149469		-0.00117957		0.0861393		0.0014851	-0.0242484		-0.0434051
30.58		0.00360437	-0.00877932		0.0295711	0.068077	-0.0327272		0.0156484	-0.0129959	0.0241115	0.0613659	0.0401109	-0.0265183			0.000916062		0.0169518		0.020406		0.053095	-0.00395175		0.00696073
30.6		0.0183058	0.0220855		0.0400426	0.0613089	0.0269281		0.00283979	0.0190877	0.0399299	0.0112429	0.0381948	0.0320032			-0.114233		0.0190124		0.00103771		0.0403851	-0.0160739		0.0222723
30.62		-0.0122331	0.0441072		0.0205891	-0.0329885	-0.0133384		-0.00210814	0.00424561	0.0726622	-0.014268	0.0393625	-0.0033946			0.0085845		0.0587417		0.00874697		0.0804577	0.0799168		-0.00881828
30.64		0.0114718	0.0777178		0.0621784	0.0920835	-0.0461344		0.0074442	-0.0120839	0.0507604	-0.0397836	0.00264757	0.00372935			-0.0450931		0.0253067		0.0788843		0.0830765	0.0565083		-0.00992134
30.66		0.0143212	0.0315648		0.226548	0.0779757	0.0121288		-0.000760665	-0.0126238	0.0271113	0.0176615	-0.00910732	-0.0076152			-0.0125112		0.00202682		0.095902		0.0245421	0.029905		0.0194487
30.68		0.0273469	0.0444923		0.0797549	0.153453	-0.00995863		0.0105763	-0.00851539	-0.0175515	0.0611337	-0.0219166	0.0244991			-0.0213647		-0.0159219		0.0156604		0.0108542	0.0194805		-0.00198689
30.7		-0.020501	0.0496621		0.190828	0.0289556	-0.00857987		0.00646804	0.0130087	0.0553234	0.00771112	-0.0442956	0.0426988			0.00391645		0.0118415		0.0254942		0.056616	0.0385485		-0.021391
30.72		0.0158347	0.019563		0.0278189	0.083477	-0.00224081		0.0308785	-0.0281829	0.0211939	0.0288707	-0.0212519	0.0144759			-0.126264		0.0290362		0.0398882		0.0418234	0.0261601		-0.0781222
30.74		0.0778081	0.0338017		0.0454845	0.0118334	0.0525635		-0.00286163	0.0109294	0.0309155	0.0534089	-0.0154163	-0.00589131			0.0537689		0.0310752		0.0579918		0.00784508	0.0116289		-0.026525
30.76		-0.00328367	0.0539425		0.113736	0.190151	-0.00487548		0.0206576	0.007018	0.0390986	0.0619306	0.0228457	-0.00780346			-0.00520642		-0.0202861		0.0455007		0.0418809	0.0408583		0.0174069
30.78		-0.0385054	0.0494141		0.11605	-0.0118298	-0.0310852		0.00524325	-0.0201203	-0.00320714	-0.00780753	0.0140041	0.031393			0.0157927		-0.00434044		0.0068906		0.0586867	0.00759321		0.0344023
30.8		-0.0846632	0.058197		0.154578	0.0606801	-0.045831		0.016437	0.00671452	0.0292481	0.0678201	-0.00328128	-0.00619506			-0.0824458		-0.00323596		-0.00514846		0.0410951	0.00207881		0.00189944
30.82		-0.0247913	0.0437164		0.0255185	0.0395797	0.0341437		0.027087	0.0043946	0.0200071	-0.00494111	0.0054497	0.0111093			-0.0143247		0.00410709		0.0183207		0.0314637	-0.0584773		0.0144764
30.84		-0.00660662	0.0090435		0.0984345	0.0123735	-0.0383106		0.0159131	0.0139383	-0.00538352	0.0118808	0.00927167	-0.0204899			-0.0264634		-0.0214551		0.0240816		0.0386763	0.0683556		-0.0156723
30.86		-0.0088852	0.0338719		0.0567969	-0.0504276	-0.0508686		0.0436133	0.0208773	0.0380121	0.0491845	-0.0214524	0.00917106			-0.048253		-0.0272345		0.0192586		0.0667156	-0.0331423		0.00930374
30.88		-0.00193316	0.043222		0.0726064	0.0206634	-0.00796221		0.0250798	0.0194002	-0.0117045	-0.00329113	-0.00192709	0.00761984			0.000489194		0.0044393		0.0621712		-0.00244866	0.0616276		0.0329087
30.9		-0.0281693	0.019421		0.0540329	-0.0100901	-0.0170623		0.0226672	0.00632325	0.0349283	-0.0328561	-0.00467274	0.0172695			-0.056333		0.00442451		-0.0523685		0.0298676	-0.0332526		-0.036894
30.92		-0.0263457	0.0261053		0.0257578	0.0063455	-0.00672175		0.00489303	0.0065409	0.016302	0.057104	0.0447919	0.0233387			-0.0305645		0.00831552		0.0192402		0.00818119	0.0170344		0.0188389
30.94		-0.0396258	0.00696861		0.00388555	-0.0746711	0.0238859		0.011593	0.00434793	0.0343296	-0.00563744	-0.0199652	0.0067192			-0.00057224		-0.00314477		-0.0240185		0.00371763	-0.00515434		0.0156013
30.96		0.011454	0.0590526		0.0901613	0.0158516	-0.0448534		0.017076	0.0246673	0.0602786	0.0437133	-0.0136343	0.0100376			-0.0194898		0.00646841		0.0753761		0.0398092	-0.011268		0.00747212
30.98		-0.029005	0.0990495		0.0594025	0.0811127	-0.0334286		0.0160883	0.0275977	0.0249484	-0.00687757	0.0469543	-0.038174			-0.0878567		-0.0138749		-0.0150973		0.0263693	-0.0498788		0.0073123
31		-0.00236115	0.0625085		0.149903	-0.0618869	0.0307335		0.0211866	0.0157509	-0.00691577	0.0391115	-0.00501971	-0.0181928			-0.0188187		-0.0254141		0.0173605		-0.004213	0.080256		-0.0434303
31.02		0.0380244	0.0451903		0.0990043	0.0777497	-0.0141233		0.0172304	-0.00556221	0.016763	-0.00310327	-0.00397046	-0.0395569			0.0151221		0.00371583		0.0712407		-0.0114272	-0.0152536		-0.00568596
31.04		0.0197415	0.0458186		0.0812804	0.0139398	0.0632694		0.00739772	0.00684511	0.00401958	0.00361089	-0.00667684	-0.00214078			-0.0137607		-0.0171653		0.0514678		0.0103376	0.017242		-0.0581269
31.06		-0.0583274	0.0620344		0.0664611	0.0564621	0.022784		0.0195834	-0.0200796	-0.00100067	0.0115803	-0.0209983	0.0428548			-0.000865394		0.00643871		0.068474		-0.0178542	0.0336142		-0.0112737
31.08		-0.0490492	-0.0079798		0.0355862	0.0597812	-0.0529388		0.00659314	0.00997564	-0.00795774	-0.042749	0.00452547	-0.0284969			-0.0404481		0.00883463		0.017564		0.0669949	0.0187031		-0.0127983
31.1		0.0352885	0.0575181		0.0809445	0.03076	0.018059		-0.0159036	0.0128418	0.0596109	0.04737	0.0522583	-0.0308624			-0.0163306		-0.0528137		0.0523521		0.0116607	0.0278636		0.0369985
31.12		0.0172423	0.0490758		0.0161149	0.0592393	0.00288536		0.0122651	-0.0257926	-0.00467983	-0.00610903	0.0522925	0.0144238			-0.0147764		-0.0213677		0.0189344		-0.00707841	0.0297715		-0.0143473
31.14		0.0237765	0.0530524		0.12111	-0.0895684	-0.0283176		0.0236764	0.0241328	0.0343954	0.0620836	0.051507	-0.00094796			-0.020311		0.0293127		0.0314152		0.0585497	0.0163827		-0.0156476
31.16		0.00664782	0.0651495		0.0716008	0.216084	-0.0478402		0.0238653	-0.0359145	0.053495	-0.017703	0.0363306	-0.00383475			0.0245313		-0.00512543		0.00228963		-0.0115332	0.0603792		-0.0113929
31.18		0.0533872	0.0291138		0.0648472	0.00857996	0.0108647		0.0306952	0.000751259	0.0373922	-0.0217162	-0.0454217	-0.006617			-0.00121862		0.0210912		0.0128121		0.026	-0.0169749		-0.0104615
31.2		-0.000412481	0.0733321		0.0862651	-0.0580214	0.0136362		0.013599	-0.0250879	-0.00864236	0.0531057	0.0123756	0.00852197			0.00638158		0.0101965		0.0871458		0.0139008	0.0131763		0.0462704
31.22		-0.0853576	0.0539831		0.0248983	0.132582	-0.0515658		0.0198198	0.0253685	0.0487974	0.021542	-0.0351434	-0.0223155			-0.013401		0.00615576		0.0629134		0.0218003	-0.0279651		0.0200137
31.24		-0.0216651	0.0133181		0.0856509	0.0513726	-0.00704277		0.00606649	-0.00935261	0.00640082	0.0243062	0.0528232	-0.0335571			-0.0292652		-0.0328121		0.010937		-0.00143285	0.000606349		0.0330661
31.26		0.0330876	0.0481854		0.0456258	-0.0248648	-0.0596728		0.0140745	-0.0390918	0.0278789	-0.0340259	-0.0101252	-0.00964343			-0.0340966		-0.0258529		-0.0119635		0.00607714	0.00910533		0.0167374
31.28		0.0409758	0.00719462		0.0310135	-0.0392483	-0.0240497		0.0184856	-0.00829649	0.0304976	-0.0373384	-0.0307674	-0.0136523			0.00368616		-0.0115383		0.0335839		0.0319729	0.0309781		0.0495684
31.3		0.00094901	-0.0163829		0.267793	-0.0134959	0.00193929		-0.00693193	-0.0184844	0.0366977	-0.00298728	0.0398607	-0.00414425			-0.00861154		-0.00301025		0.0895911		0.0695887	0.0273562		-0.00303519
31.32		0.00454888	0.0451296		0.0457549	-0.00716352	0.00240489		0.0151003	0.00535445	0.0069626	0.0738059	0.0123555	-0.0276186			-0.0503326		0.00273716		-0.0713873		0.0550025	0.0604709		0.0254741
31.34		-0.0713313	-0.00688853		0.168567	-0.00841937	-0.0312709		0.0439639	0.0177579	0.0327847	-0.0286144	-0.00766414	-0.0146918			-0.0985959		0.0220554		0.0237881		-0.0310103	0.0805045		0.0195896
31.36		-0.0111149	0.0576456		0.0955172	0.0167804	-0.0130973		0.0138094	-0.00874935	0.0625025	-0.0130522	-0.015161	-0.015278			-0.0380907		0.016205		0.0554897		-0.0199549	0.0157235		-0.0476349
31.38		-0.0218913	0.0426592		0.0277732	0.0620597	-0.00497074		0.0189977	0.0350797	0.0288101	-0.0389393	0.0277721	0.0107968			0.0220964		0.0264294		0.0319114		0.0593211	0.0393025		-0.0235567
31.4		-0.00742325	-0.0117538		0.0791769	0.0412138	-0.049095		-0.00678459	0.00975119	0.0201715	-0.0183905	-0.0680987	-0.0135406			0.0377177		-0.00382609		0.00492851		-0.083725	-0.0106075		-0.0279267
31.42		-0.00784133	0.0208402		0.0855703	-0.0353063	-0.0405406		0.0120343	-0.0300425	0.0283408	-0.0106168	0.00235514	0.0309608			-0.0496913		0.0398009		-0.0152457			0.0109774		-0.0362236
31.44		0.0161548	0.0122362		0.0852689	0.106977	-0.0545889		-0.00402577	-0.0204035	0.0427724	0.0522406	-0.00430734	-0.0197033			-0.00255331		0.0388975		0.0415491			-0.0114143		0.0818674
31.46		-0.0131274	0.0536999		0.116349	0.000173079	-0.00919961		0.0323252	0.0244356	0.0467284	0.0561539	-0.0309605	-0.0254892			0.00484617		0.02858		0.0674603			0.0232085		-0.0275676
31.48		0.0388579	0.0204278		0.109466	-0.0129595	0.0131719		0.00761449	0.0024388	0.0517142	-0.0255629	-0.0277337	0.0248469			-0.00582305		-0.018693		0.0611519			-0.012217		0.0285072
31.5		-0.0120487	0.0318733		0.0133547	0.0144204	-0.00706413		0.0194311	-0.0168496	0.0346995		0.0398014	0.00353477			-0.102244		-0.0139737		0.00281418			0.12765		0.0435438
31.52		0.0115687	0.0524075		0.0695474	0.034572	-0.0317129		0.00662221	0.0122465	0.0304642	0.0320571	-0.0292693	0.0112524			-0.0528115		0.0067643		-0.0586087			-0.00425506		-0.00733747
31.54		0.0384702	0.0615227		0.00880353	0.0740102	-0.0313205		0.0269455	-0.0285664	0.0451896	-0.00574772	0.0356956	0.011361			-0.0597746		0.00526399		0.048859			0.0412925		0.0024984
31.56		0.0123852	0.0202794		0.0957345	-0.0291779	0.0305408		0.0199626	-0.03336	0.0364126	0.0564653	-0.0762179	-0.0190477			-0.102972		0.00211915		0.0929805			-0.0259641		0.00791014
31.58		-0.0029079	0.0404205		0.0586672	0.00832127	0.0159169		0.0100697	0.0153607	0.0114583	-0.0223934	0.0327133	0.00159938			0.0185243		0.0246189		0.100019			0.00153205		0.00019993
31.6		-0.0524235	-0.0233318		0.00624816	-0.0285281	-0.0250439		-0.0194568	0.0109133	0.0488712	0.0601557	-0.021647	-0.0115464			-0.0587031		-0.0356628		0.0617552			0.0148048		0.0144196
31.62		0.0568042	0.00175515		0.00797304	0.0288192	0.0214437		0.00105321	0.0112089	0.0472135	-0.0085314	0.0236671	-0.0260179			-0.0268622		-0.0249196		0.0336893			0.031699		-0.00226407
31.64		0.0139444	0.0353091		0.0547986	-0.0930837	0.0233609		0.0200527	0.0189764	0.0293238	0.0148831	0.0102086	-0.0205331			-0.0377291		0.0105244		0.0100061			-0.00163606		0.00114886
31.66		0.00137702	0.0483071		0.0282926	0.0485972	-0.0363213		-0.00566432	-0.0115629	0.0255223	0.0595603	-0.01059	-0.0185842			-0.0311894		0.0143237		0.0448896			0.0194373		-0.0101198
31.68		0.000925784	-0.0142032		0.0436455	0.0147808	0.00495166		-0.0122541	6.83104e-05	0.0588848	0.0457108	0.0359364	0.00303646			-0.0204927		0.0151232		0.0231014			0.0415588		-0.0191242
31.7		0.0241928	0.0672524		0.0695138	-0.001498	-0.0162114		0.00600708	0.0110606	-0.0153689	-0.0107633	0.0105861	-0.00963082			4.37096e-05		0.00533708		-0.0747593			-0.00138985		-0.0101082
31.72		-0.0113355	0.0245328		0.123469	-0.0228001	-0.00160994		0.0222286	0.0108711	-0.0153633	-0.00466169	0.0595595	-0.0500223			0.0288162		-0.019375		0.0293216			-0.0266885		0.0116212
31.74		0.0326121	0.0612666		0.0497942	-0.0557387	-0.0264331		0.0311245	-0.0434292	0.0592057	0.0422571	-0.00889803	-0.0005268			0.05327		0.0242053		0.0148185			-0.0275037		-0.0242781
31.76		-0.00755464	0.00349239		0.11516	0.056096	-0.00447613		0.0248573	-0.00762192	0.028694	0.045928	0.0545634	-0.0315067			0.0430283		-0.0210412		0.0616015			-0.0277552		-0.0401693
31.78		-0.0086461	0.0473383		0.0688581	0.0112792	-0.0226653		0.0289876	-0.0277491	0.0126227	0.00089897	-0.0178317	0.00467672			0.00956959		-0.0443297		0.0687091			0.0211072		0.00466013
31.8		0.00130728	0.0256808		0.00734753	0.0767669	-0.00510899		0.0109743	0.01516	0.0217063	0.00110544	-0.0190745	-0.00910705			0.015079		0.0113792		-0.0477278			-0.00735045		0.024043
31.82		0.0446195	0.00357223		0.0470984	-0.0219524	-0.00492334		0.00283789	-0.0169158	0.010662	0.0390923	0.0223692	0.0205634			-0.0522997		-0.00765826		0.0635479			0.0333713		-0.0127626
31.84		0.0233167	0.0442832		0.169451	0.12168	-0.00180476		0.0181174	0.00113477	0.0204859	0.0160385	0.0208563	0.0190407			0.00885703		-0.0257098		-0.0179362			-0.00796881		0.0206452
31.86		-0.0340076	0.0547479		0.0463117	-0.0718829	0.045831		0.0171616	0.00153461	0.0419166	-0.00863263	-0.00995278	0.0203538			-0.0192973		0.0123542		0.0562946			-0.00962925		0.0647899
31.88		0.0614201	-0.00898979		0.0434016	-0.00516574	-0.0188111		0.0315139	-0.031478	-0.00193933	0.0029776	-0.0328661	-0.0182906			0.000943553		0.0518579		0.0635268			-0.00272376		-0.0225429
31.9		0.0235581	0.0395288		-0.00253162	0.0907472	-0.0166433		0.00787937	0.00444982	0.0276722	0.0633035	0.0411998	-0.00786715			-0.0606544		-0.0080678		0.0200726			-0.0018166		0.00832868
31.92		0.0206078	0.030141		0.0288399	0.0566329	-0.0153777		0.0157598	0.00783602	-0.0115703	-0.0297999	0.0344144	-0.00853515			-0.0337856		-0.0407177		0.0274595			0.00661533		-0.0700665
31.94		-0.0905893	-0.00987239		0.103136	0.0215531	-0.0184638		0.0346626	0.0353244	0.0342058	-0.06186	0.00581986	-0.0335945			-0.0841862		0.00010477		-0.0302914			0.0142594		-0.0451254
31.96		0.0360352	0.016137		0.0319033	0.029597	0.0104632		0.0190769	-0.00177996	0.0304654	0.0128621	-0.0490965	0.0442308			-0.0221079		-0.0203861		0.0248364			0.042239		-0.145388
31.98		0.00160184	0.0137585		0.200325	0.0774345	-0.0432607		0.0255795	0.0266768	0.0562235	0.0193159	0.0206213	-0.00478943			-0.0492995		-0.00315405		0.0275295			0.0249047		-0.0660386
32		0.025748	0.0487923		0.0398916	0.0318423	0.0276217		0.00528515	-0.00597069	0.0309167	-0.0275035	0.0156092	0.0534342			-0.0755336		0.01514		0.0211882			0.00166197		-0.0565389
32.02		0.0220027	0.029349		0.0671412	-0.0592711	-0.0673693		0.0140977	0.0303462	0.0525603	0.0195557	-0.0180066	0.0249352			-0.100653		0.0475214		-0.0300682			0.00191739		0.0208922
32.04		0.0265446	0.0504012		0.0348756	0.0366021	0.00708337		0.00990583	-0.0100489	0.0260353	-0.0279553	-0.076662	0.0143702			0.00466584		-0.0398012		-0.0151069			0.00902164		-0.0137691
32.06		0.0240647	-0.00632739		0.0916033	-0.0239854	-0.00523778		0.0290379	-0.0138245	0.0116108	0.0394961	0.0624646	-0.0255678			-0.0088697		0.00759074		0.0682764			0.0356151		-0.0452873
32.08		-0.0256243	0.0405594		0.0727216	0.045309	-0.012664		0.00329855	0.012837	0.0282558	-0.0131118	0.00105866	0.036803			0.0241417		-0.0041899		-0.0281025			0.0534747		-0.00931521
32.1		-0.054353	0.0313956		0.105501	0.0924772	0.00511646		0.0283837	-0.00282006	0.0428925	0.00885604	-0.0127191	0.0182271			-0.0372931		-0.0158024		-0.0132072			-0.00701173		-0.00910855
32.12		-0.00160846	0.0311898		0.0575286	0.0775285	-0.0582054		-0.00601811	0.000219411	0.0349544	-0.0210164	0.00872392	0.00276398			0.00606846		0.0419171		0.00263192			-0.00650944		0.0225277
32.14		-0.0082514	0.0160566		0.0594991	0.0525127	-0.0421008		0.0273614	0.00235074	0.036358	-0.0427113	0.0194763	-0.00241475			-0.0280306		0.00148018		-0.0188512			0.0182879		0.00708227
32.16		-0.00161816	0.0458955		0.0110717	0.0319342	0.00745894		0.0165879	-0.0017802	0.0332413	-0.000100417	-0.0335299	-0.0171329			0.0155227		-0.0393869		0.0111185			-0.0184428		0.0123221
32.18		-0.0545245	0.0384012		0.110932	0.0230242	-0.0219155		-0.00262755	-0.0031741	-0.0216813	-0.00311597	-0.000660999	-0.0177391			-0.102819		0.00338823		0.0520603			0.0454584		-0.0102737
32.2		0.0355019	-0.00887238		0.0669535	0.0178277	0.021663		0.0278494	-0.0144043	-0.000366042	0.0159854	0.00476273	-0.0116213			-0.0118982		0.0642652		0.0177803			0.0231189		-0.0165406
32.22		0.0046351	0.0176499		0.0843733	0.113603	0.00667094		0.00285456	-0.000872936	0.00522506	-0.065325	0.0239859	-0.0160299			-0.000648321		0.0102998		-0.031682			-0.0236236		-0.0161907
32.24		0.00950995	0.0307192		0.0402797	0.0537112	-0.0285556		0.0183456	0.038558	0.0335568	0.033256	0.0484005	-0.045778			0.0189858		0.00216929		0.0429157			0.0358323		0.0490231
32.26		-0.0225304	0.0394263		0.0289654	-0.0869719	-0.0149526		0.0138142	0.000610664	0.0490955	-0.0368689	0.0373352	0.00418737			-0.0342798		-0.0361843		0.0687554			0.0268682		0.052499
32.28		0.00414365	0.035649		0.0826679	0.0717429	-0.0176297		0.0150424	0.00789924	0.00838114	-0.0486706	-0.0188966	0.009878			0.0416302		0.0313325		-0.0184246			-0.0134335		0.0262853
32.3		0.0149602	0.0577739		0.0610605	-0.0240101	-0.0229509		0.022188	-0.000877097	0.0381057	-0.0317405	-0.0211377	-0.0135125			-0.00917704		-0.0582204		-0.014285			-0.0196273		0.0237083
32.32		-0.00720214	0.0185901		0.0608976	-0.0089718	0.0237596		-0.00218851	-0.00133416	0.0435448	-0.0205957	-0.00833665	-0.0388604			0.0269978		-0.0256828		-0.00392723			-0.018213		0.0229066
32.34		-0.00989715	0.001757		0.0388825	0.0599528	0.0162531		0.0271126	-0.013031	0.00432878	-0.0101718	-0.037353	0.0372893			-0.0283602		0.0312198		0.0475738			0.00146144		-0.0145029
32.36		-0.00450455	0.00848491		0.0388226	0.143768	0.0171646		0.0134613	-0.0247305	0.0222369	-0.0337723	-0.0542174	-0.007458			0.00475912		-0.00916875		0.0329327			0.0272532		0.022158
32.38		-0.0270995	0.0633115		0.0225425	-0.120169	-0.00945385		0.0113003	0.0135184	0.0420068	-0.00497538	-0.0171346	0.0223891			0.0221558		0.0302907		-0.027363			0.0645225		0.0479174
32.4		0.0127711	-0.0220993		0.076824	-0.0233232	0.0128748		0.0164457	-0.0248763	-0.00818103	0.0586829	-0.0392291	-0.0358893			0.0221038		-0.00626367		0.0534482			0.0319084		-0.000601744
32.42		0.0195361	0.0128431		0.052325	-0.0384732	-0.016829		0.0146075	0.0322835	0.00844423	-0.0312539	0.0488618	-0.0242471			-0.00116796		0.0301566		0.0497816			0.0144687		-0.0254393
32.44		0.0253902	0.0316757		0.0569083	-0.0526194	-0.00911868		0.0136395	-0.031181	0.0297554	-0.0359231	-0.0652883	-0.0231373			-0.0329389		-0.0321238		0.0602165			-0.0271935		0.0288683
32.46		-0.0165753	0.0432408		0.00891494	-0.01625	0.024775		-0.0177555	0.00987703	0.0300583	0.0531669	0.0461857	-0.0036212			-0.0150661		0.0366006		0.0604639			-0.0169228		-0.0283164
32.48		-0.0339587	0.0555453		0.0895424	0.0345241	-0.0475585		0.0169853	-0.034264	0.0234085	0.00279445	0.0288644	0.000929376			-0.0825321		-0.00180824		0.00627673			-0.0136877		-0.019697
32.5		0.00905796	0.0401516		0.0863734	0.026367	-0.0472108		0.00211531	-0.000773674	0.0069955	0.0585715	-0.00444405	-0.00181503			0.0359453		0.0011134		0.0686644			-0.000143169		-0.0139186
32.52		-0.0295092	0.0265999		0.0606267	0.139588	-0.0411023		0.0202694	0.0114493	0.042597	-0.00582816	-0.00372712	0.025292			-0.118789		0.0301777		-0.000509179			0.0397129		-0.00315167
32.54		-0.041008	0.0547883		0.253257	-0.12511	-0.0155368		0.0232738	0.0399676	0.0470342	0.00275513	-0.00591689	-0.0269054			0.00852977		-0.005314		-0.0217495			0.0097205		-0.0168538
32.56		0.0250296	0.00414423		0.0266466	-0.01763	-0.0295617		0.00415234	-0.0139832	0.0325297	0.0152914	-0.060574	-0.00418443			-0.0829129		-0.00444522		-0.00622235			-8.87189e-05		0.034293
32.58		-0.0362625	0.0323392		0.0122511	-0.125776	-0.0314797		0.0425713	0.00876172	0.042576	-0.0642421	-0.0554477	0.0506042			-0.100263		0.0135753		0.0928069			0.0289809		0.0490804
32.6		-0.0223278	0.0242883		0.0304647	0.0567466	0.0414951		0.0221244	0.0105002	0.0251499		-0.0333487	0.0443337			0.0219308		0.0221652		0.0575571			-0.0147412		0.00194769
32.62		-0.00771523	0.0800227		0.0270959	-0.0207279	0.0356379		0.0246785	-0.023832	0.0253026	-0.00890237	0.00768684	-0.0615778			-0.048074		-0.00615116		0.0439341			-0.00985993		-0.0121083
32.64		0.0256429	0.0729398		0.0720882	-0.044616	0.00668755		0.00468656	0.00610585	0.0220348	0.0123271	-0.0189408	0.0125106			-0.00735089		-0.00833937		0.0414193			0.0431763		-0.000451367
32.66		-0.00463651	0.0214619		0.0523817	-0.0580933	-0.0267881		0.0108808	-0.0279676	0.0358436	-0.00485606	-0.0521348	-0.00342654			0.00727542		-0.00296781		0.0116776			0.0370642		-0.0386317
32.68		-0.0676237	0.0333228		0.111706	0.0576646	0.0109134		0.0262236	0.0173342	0.0039387	-0.00334979	0.00172812	0.0174358			-0.101661		-0.00228827		0.0595307			-0.00176478		0.016483
32.7		-0.000729016	0.0749022		0.0917653	0.0281621	-0.0150902		-0.00813947	0.0101284	0.0384648	-0.015453	0.0141789	0.0103813			-0.0768469		0.00594326		0.0492379			0.0208416		-0.0184696
32.72		0.0472191	0.00510724		0.01751	0.0690865	-0.0383424		-0.0119509	0.0175033	0.032032	0.000891002	0.0345044	0.0125069			-0.0264397		-0.00534857		0.022718			-0.0349922		-0.023708
32.74		-0.0924885	0.0329462		0.106017	-0.036546	0.0136163		0.0224849	-0.00424791	0.0241678	-0.000460422	-0.0113692	0.0187923			-0.0426703		0.0325367		0.0157397			0.0318675		0.00452033
32.76		-0.00392914	0.0195332		0.048918	0.0166081	-0.0233803		0.00110482	-0.0142692	0.0357815	-0.0461171	0.0239325	-0.0402822			-0.0667874		-0.0203189		0.0597381			0.000211042		0.0102099
32.78		0.00343667	0.0380921		0.049671	0.0201453	-0.0442465		-0.00755925	0.00849059	0.0158823	0.0448216	0.0067403	-0.030271			-0.0510421		-0.0140622		0.0752174			-0.0311528		-0.00892655
32.8		0.0275269	0.0370553		0.0612062	-0.0870911	0.0134028		0.0203221	0.00287895	-0.00521674	-0.00717171	0.0611509	-0.00487906			-0.00807614		-0.0428159		-0.0044884			0.0183993		0.0255596
32.82		0.0266321	0.0299947		0.0864975	-0.106936	-0.0534475		-0.0196916	0.0361871	0.0255	-0.0548426	0.0163425	-0.00411542			-0.0176707		0.0265475		-0.0119102			-0.0417016		0.035981
32.84		-0.00171638	0.0313948		0.0536032	0.0830129	0.0301811		0.0303382	0.0142074	0.021429	-0.033519	-0.0536039	0.0279079			-0.00642899		-0.013448		-0.00207952			-0.010075		-0.0171417
32.86		0.0610714	0.0210097		0.120992	-0.0332921	0.0345018		0.0302279	0.0157016	0.0522906	-0.0141902	0.0135732	-0.000442779			-0.0496144		-0.0220894		0.0183251			0.0395354		-0.121605
32.88		-0.0222924	0.0479222		0.0872138	0.0272131	-0.0512448		-0.00918205	0.043857	0.00124641	-0.0357854	-0.00640543	-0.00131191			0.00878144		-0.0357869		0.00980317			0.0198147		-0.00638838
32.9		0.0600971	0.0286661		0.11737	0.07069	-0.0127262		0.00479292	0.000840966	0.0251368	-0.0446468	0.0548697	0.0238899			0.0530069		0.02122		0.013699			0.00934457		-0.00173748
32.92		-0.00143349	0.0360461		0.0201133	-0.0185382	-0.0683238		-0.0066326	-0.0167125	0.0394325		0.00427351	0.0285657			-0.0751685		0.0631359		-0.0221513			0.0165913		-0.00631646
32.94		-0.00164688	0.0398882		0.0642278	-0.0257659	-0.0166806		0.0053754	-0.0188089	0.0412308	-0.0339872	0.00280386	0.00622087			0.0452819		0.0259299		-0.000419689			-0.0588418		0.0187005
32.96		0.00768262	0.0342442		0.0882326	-0.0389095	-0.0238858		-0.014777	-0.00598511	-0.00632507	-0.0331835	-0.0763098	-0.0233155			-0.0574077		0.0112033		0.0410579			0.00273048		-0.00054286
32.98		-0.0137802	0.0226751		0.0694801	0.0153579	-0.0457418		0.0245733	-0.0102175	0.0244595	-0.0247787	0.0351121	-0.0151987			-0.0368593		0.0314912		0.00540053			0.0645081		-0.0188584
33		0.0220508	0.0208838		0.0423699	0.124135	-0.0054148		0.00383016	-0.015539	0.0221095	-0.0206484	-0.0786453	-0.0288106			0.0184253		-0.00199741		0.0561085			0.0421768		0.0116126
33.02		0.000120427	0.0158689		0.0934928	-0.0336571	-0.00578506		0.0116968	-0.00414864	0.0339676	-0.04325	0.0271968	-0.0274925			-0.0868641		-0.0597836		0.00670092			0.0243432		-0.0171579
33.04		-0.0108639	0.0647429		0.0263466	-0.0653863	-0.0051477		0.00198168	0.0235404	-0.00205674	-0.0256728	0.0395009	-0.00493706			-0.00742001		-0.000476114		0.0390458			-0.0291071		0.00361791
33.06		0.00369403	0.0208875		0.0523	0.0819756	-0.0452587		0.0109117	-0.0217226	0.0493906	-0.0339074	0.0617419	0.0354433			0.0199052		-0.0114223		-0.0573703			0.034732		0.00669067
33.08		-0.0233622	0.0605486		-0.0218764	-0.0345371	0.0278295		0.0249429	0.00477656	0.00438763	-0.0485288	-0.0226491	-0.00560881			0.0401259		0.0166472		0.0522116			-0.0126547		0.035883
33.1		-0.0519546	-0.00366915		-0.0132056	-0.0316717	-0.0328587		0.021879	-0.0272914	0.0340513	-0.0244864	0.0507459	0.014389			-0.0191835		-0.00356665		0.02264			0.00303019		0.0119258
33.12		0.0302524	0.00382326		0.0663183	0.017074	-0.0204744		0.0196881	-0.0248166	0.0362017	0.0317762	-0.0410148	0.00935269			0.00661562		0.00147504		0.047506			-0.0338452		0.0369713
33.14		-0.0193372	0.0118077		0.0575632	-0.0229517	-0.0147267		0.0368872	-0.031515	0.0307645	-0.016693	-0.00710944	0.0164576			-0.00178937		0.0529111		0.0217968			-0.000944694		-0.00991348
33.16		-0.023234	0.0131437		0.0592588	-0.0301129	0.00462415		0.00250927	0.00419087	-0.00204388	0.00345928	-0.0432233	-0.0315281			-0.0511785		0.0525206		0.0237355			0.0369655		-0.0351684
33.18		-0.0170725	0.0234846		0.0524467	-0.0128498	-0.00495152		0.00685022	0.00916362	0.0139906	0.00038229	0.0416001	0.00995207			-0.126003		0.0138051		0.0160656			-0.032667		-0.0222291
33.2		-0.0200265	0.0235059		0.131409	-0.0780998	0.00185761		0.0320836	0.0107793	0.029718	-0.0254831	0.0385028	0.0436037			-0.0673943		0.0372528		0.0283206			-0.0215235		0.0152005
33.22		0.00233403	0.0171691		-0.0430232	-0.0380565	-0.0360271		0.00209246	-0.000984118	0.0499006	-0.0272861	-0.0325985	0.040655			-0.0250168		-0.012796		0.0160414			-0.0161234		0.0443654
33.24		0.0201401	0.029685		0.159362	0.023368	0.0498956		-0.0001293	0.0165211	0.0126734	-0.0241225	0.0164443	0.0666649			-0.0692161		0.00347286		-0.00166084			0.0429689		-0.02769
33.26		0.00262455	0.0166508		0.0909064	-0.000929738	-0.00115984		0.0116285	0.0182328	0.00998274	-0.0153019	-0.0150299	0.00902473			-0.0284212		-0.00878992		0.0336233			-0.0108782		-0.00477408
33.28		-0.00845751	0.0225858		0.22046	-0.0102749	-0.0465166		0.0143461	-0.00252179	0.0506772	0.0289909	-0.0386666	-0.019003			-0.0732905		-0.00927522		0.04193			0.0443914		0.0386338
33.3		-0.00377885	-0.0217471		0.0568051	0.0384532	-0.00787897		0.0156384	-0.000781552	0.00365317	-0.0081132	0.0294411	-0.000505036			0.0231047		0.0149844		0.0552212			0.056708		0.0361766
33.32		0.0549495	0.000263911		0.114683	0.0172006	-0.0446321		0.0178414	-0.00898761	0.0256491	-0.0400628	-0.0367625	0.00752741			-0.0663094		0.0141281		-0.0191712			0.0511224		0.0200285
33.34		0.00395474	-0.00214051			0.0165797	0.007579		0.0108339	-0.00351633	0.00611113	0.0127226	-0.00786193	-0.0171431			-0.0250128		-0.0187218		0.047839			-0.0182403		0.0531933
33.36		0.00621145	0.0180675		0.0934052	-0.0191157	-0.00629639		0.0145976	-0.00295461	0.0607695	0.0448975	0.0356322	0.0114956			-0.00205361		-0.0181091		0.06017			0.0276548		0.00748741
33.38		0.00101151	0.0218171		0.0980974	-0.0478161	0.034706		0.00578618	0.020827	0.0338325	-0.0190073	0.0682981	0.005496			-0.00243215		0.0196316		-0.00814674			-0.00354278		0.0135639
33.4		-0.0565849	0.0403966		0.0799473	0.0277631	-0.0322129		0.0190235	0.0147475	0.0139855	-0.0597462	0.01026	0.0288587			0.0427131		-0.0192141		-0.00904651			0.0318639		0.0284716
33.42		0.0238824	0.0288755		-0.00607912	-0.0879129	-0.0152514		0.0241178	-0.0270488	0.0421896	-0.0164721	-0.0211691	0.0148561			-0.0488511		-0.0236305		-0.00443586			-0.0449371		-0.0771809
33.44		-0.0261826	0.0162264		0.0356581	0.0387176	-0.02213		0.0157826	-0.0162223	0.0214648	0.0500266	-0.0111454	-0.0242338			-0.0703252		-0.000250435		0.0373821			-0.0548938		-0.00498305
33.46		-0.0403117	0.0227267		0.0860591	0.0694732	0.00206165		0.00478433	-0.00452117	0.0497185	-0.00492545	-0.00331686	0.00563935			0.0481765		-0.00418233		0.0311564			-0.0026222		-0.0328832
33.48		-0.0362757	-0.00529416		0.0852526	0.00977493	0.0109941		0.0123851	-0.00813535	0.0251541	0.103464	0.0552518	0.0430369			0.0216744		0.00758303		-0.000478969			-0.0152538		0.00734657
33.5		-0.00233855	0.0847306		0.0820995	-0.0890841	-0.0100277		-0.00493477	0.0229964	0.041361	0.00120199	-0.023077	-0.0517801			0.0425177		0.0168117		0.0729216			-0.0149546		-0.0818351
33.52		-0.0317245	0.0151569		0.0933285	-0.0907066	0.00733071		0.0171293	0.0200223	0.027007	-0.00715986	0.0491717	0.0139585			-0.0693996		-0.0403884		0.037352			-0.0227961		-0.0336061
33.54		0.0351014	0.0342089		0.0473825	-0.0632531	-0.00221111		0.00776494	-0.00136263	0.0197988	0.0408734	0.000768343	-0.0148404			0.049525		0.0141867		0.0475663			0.041586		0.009438
33.56		-0.0296744	0.0159201		0.0644324	0.00339036	-0.0227326		0.0118536	0.00449268	0.0501083	-0.00330577	0.00972194	0.017783			-0.0527718		-0.048907		-0.00989258			0.00756008		-0.0167106
33.58		0.0176949	0.0298544		0.0196964	0.049586	-0.0385824		0.0172863	0.00601343	0.0417353	0.0662138	-0.00996873	0.0165846			-0.0485017		-0.00548006		0.0240372			-0.00401457		0.0466921
33.6		-0.0728425	-0.0133637		0.10032	0.0988391	-0.0554512		0.00986414	-0.00393443	0.00719273	0.00950318	0.0462438	-0.00153844			-0.0631896		0.0183957		-0.000665924			0.0426113		-0.0152192
33.62		-0.00482756	-0.00033765		0.132607	-0.038264	0.00308542		0.0275824	-0.00384358	0.0355221	-0.0468334	-0.0724459	-0.0169231			-0.0034805		0.00752371		0.00819459			-0.0315696		0.000441902
33.64		-0.0248277	0.0218558		0.0689021	-0.0676534	-0.00566798		0.0146181	-0.0119146	0.00612026	-0.0334951	0.014096	0.015663			-0.0105912		0.0162968		0.0523388			0.0134605		0.0138878
33.66		0.0288477	0.0399581		0.0773495	-0.0262254	0.00162167		0.0118392	-0.0241256	0.0404087	-0.0183762	-0.0753464	0.0172482			-0.0111306		0.00366754		0.0469682			-0.0475118		-0.0305312
33.68		0.00124167	0.0192703		0.00163729	-0.00377044	0.0298048		0.0143432	0.0194196	0.032811	-0.0276648	-0.0173518	-0.0288786			0.0134349		-0.0082197		0.0654351			-0.00694766		-0.0115508
33.7		0.0135012	0.0207019		-0.00657599	-0.0511428	0.0201186		0.040827	0.00720698	0.049549	0.0558627	-0.0155551	-0.0346095			-0.0970246		-0.021684		0.032317			0.0063464		-0.0237501
33.72		0.000776462	0.0211416		0.146809	-0.0491337	-0.0131126		0.0160339	-0.00220351	0.0423806	0.0214497	0.0261688	0.00937617			-0.00208462		0.00868491		-0.00148138			-0.0375201		0.0042783
33.74		0.0408287	0.01422		0.0527303	-0.0314086	-0.00699746		0.0191002	0.0215672	0.0472544	0.0147871	0.0199571	-0.0180442			-0.0455512		0.0210923		0.0235196			0.018947		0.0423587
33.76		-0.0419872	0.0288173		0.0521358	-0.0334864	-0.0164589		0.00636351	0.00480734	0.00669333	-0.0276351	0.0774328	-0.00207862			-0.023916		-0.00357317		-0.0220101			0.0384711		0.0303546
33.78		-0.00910974	0.032971		0.0420763	-0.0510304	-0.0357188		0.00461605	0.0152217	0.0140476	0.00607978	0.0281311	-0.0046097			-0.0262761		-0.0154116		0.01589			0.0604968		-0.027885
33.8		-0.0318743	0.0323362		0.049529	0.039023	0.0554871		0.017053	0.0046545	0.0404842	0.066659	0.035924	0.0209151			-0.00654826		0.0143913		0.0489542			0.0425386		-0.00425502
33.82		0.0359734	0.0313704		0.122271	0.00888471	-0.032878		-0.0120338	-0.025544	0.0437795	-0.0169869	-0.045057	-0.00291125			-0.020567		-0.0597493		0.0290603			0.0166545		0.0260632
33.84		0.0337953	0.0320558		0.202124	0.0100468	0.0619436		0.0139043	-0.0206131	0.0115913	-8.04819e-05	0.0543047	-0.0304772			-0.0211129		0.00757944		0.0490847			0.0732054		-0.014723
33.86		-0.0220569	0.0119555		0.0527864	0.0362661	0.0224847		0.0196213	-0.0146983	0.0164404	0.0231594	0.0316324	-0.0224883			-0.0289332		-0.0223655		-0.0295601			0.047964		0.0142193
33.88		0.010059	0.0359758		0.0643505	-0.0560667	0.00884305		0.0319114	0.0187825	0.0364551	-0.00109431	0.0521439	0.0113281			0.0365994		-0.00295457		0.0145049			-0.0112963		0.0326128
33.9		0.0174533	0.0505342		0.0353911	0.017526	-0.0129554		0.0191627	0.000584128	0.0288838	0.0204412	-0.0583602	0.0127061			-0.0229637		0.0458165		0.0278058			0.0590667		0.029815
33.92		-0.0346314	-0.0211402		0.0691984	-0.0780037	0.00831285		0.00299416	-0.0106851	-0.00690195	-0.00911887	-0.0160399	0.0164114			0.0202261		-0.00459892		0.0142447			-0.045802		-0.0282547
33.94		0.0152194	0.0252961		-0.00627698	-0.0466202	-0.00022111		-0.00826161	0.0084819	-4.02277e-05	-0.0277108	0.0177087	0.010695			-0.0172306		0.00962803		0.0116747			-0.017324		-0.0169081
33.96		0.00935183	0.000236274		0.0445991	0.0290741	-0.0582339		0.027785	0.00312623	0.0474055	-0.00398296	-0.000933346	-0.0212155			-0.0677949		0.00146563		0.0331993			0.0492127		0.0120347
33.98		-0.0696297	0.0308104		0.0924115	0.096994	-0.0342281		0.01737	0.02399	0.0465194	0.0569178	-0.00272395	-0.0164423			-0.041425		-0.00959468		0.0415786			-0.0418437		0.0106338
34		-0.00745117	-0.00380602		0.0732667	0.0419059	-0.0507477		-0.000812616	0.00676666	0.0351081	-0.0179308	0.0303511	0.0236583			-0.0390073		0.0234105		0.0676632			0.0167986		-0.00545531
34.02		-0.0396135	0.0124148		0.035619	0.0471096	-0.0455807		-0.00972232	0.0106422	0.0385512	0.0271991	-0.0249919	-0.0127822			-0.0387454		-0.00940568		0.0452744			-0.0271856		-0.0175319
34.04		0.0130278	0.0158762		0.117837	0.034236	-0.0200949		0.0134044	-0.0168275	0.0232843	0.0149951	-0.0475379	-0.0297824			-0.0580987		0.0117653		0.0828128			0.0217322		0.0182948
34.06		-0.0250043	0.0562357			0.0307525	-0.0208369		-0.00687034	0.00744246	0.0175042	0.0264023	-0.0137095	0.0491491			0.0108547		-0.0187372		0.0512614			-0.0108209		0.0117061
34.08		-0.0417826	0.0278119		0.0843005	0.0147893	-0.000931541		0.0277733	0.0137234	-0.00911217	0.00571998	0.0226178	-0.00729465			0.0032455		0.0035969		0.0810885			-0.0517789		-0.0293309
34.1		-0.0311575	0.0526504		0.0621135	-0.0312612	-0.0427373		0.00247659	-0.00268088	0.0420124	0.0344805	-0.00425664	-0.00816426			0.00403299		0.000521441		-0.00300937			0.0390412		-0.00776029
34.12		-0.0327017	0.0381534		0.0454335	-0.0829289	0.0208434		0.00429014	-0.0021261	0.0367847	0.00202824	0.0445226	0.00821368			-0.00886896		-0.0103184		0.0375339			-0.0309228		-0.0241157
34.14		-0.00274397	0.0622969		0.0956403	0.0586762	0.00434501		0.03002	-0.0321017	0.0334771	-0.0497567	0.000755162	0.0132158			0.00559417		-0.0466186		0.0378751			0.0337056		-0.00724105
34.16		-0.0671	0.0875619		0.0848182	-0.0343411	0.00848397		0.0159463	-0.0182712	0.0416701	-0.0363696	-0.0131892	-0.00181302			-0.0809203		0.00700268		0.0639489			-0.0116342		-0.01076
34.18		0.00203679	0.0502082		0.0132484	-0.0501729	0.0165555		0.0106052	0.0357527	0.0286528	-0.0319119	0.0333337	0.0264245			0.00967031		0.00466932		0.0275706			-0.0621054		0.0146314
34.2		-0.0332858	0.0236689		0.0596885	0.0458219	0.0171144		0.025356	-0.0266363	0.0275759	-0.0258103	0.0750772	-0.000450262			-0.0560674		0.0164347		0.0296842			-0.00837915		-0.069746
34.22		0.0039742	0.0474136		0.0642626	-0.0922052	0.00520967		0.0121761	0.000787999	0.0214586	-0.0176768	0.0186726	-0.0051855			0.0340843		0.0438295		0.0182718			0.0342477		-0.0374125
34.24		-0.0599413	0.0471044		0.0513716	0.0230791	-0.00110117		0.0245562	-0.000694716	0.0151022	0.0202055	0.00197905	0.0221945			-0.036678		-0.0209285		-0.0377481			0.0495821		0.00384864
34.26		-0.015909	0.0235034		-0.0143019	-0.0212701	-0.0232724		0.0381144	-0.00456791	0.0102708	-0.0129754	-0.0166686	-0.0248928			0.00347526		-0.0243396		0.0649279			0.0289718		-0.0186645
34.28		-0.0318191	0.0667006		0.00192289	-0.0575681	-0.0366799		0.000331702	-0.0142117	0.0496937	0.0116203	-0.0280487	-0.0164526			-0.0560976		-0.0200101		0.0383055			0.0460428		-0.0104941
34.3		-0.0398294	0.0114505		0.0817263	-0.133169	-0.003952		0.0194138	-0.00216209	-0.00149487	0.0730055	-0.000878765	0.0281132			-0.0615966		0.0228411		0.0163495			0.00928947		-0.00647763
34.32		-0.0442364	0.0276166			0.0105027	-0.0430436		0.00330175	-0.000270143	0.0381074	-0.0234618	0.0695167	-0.0335191			0.0270105		0.027326		0.0265434			0.0016527		-0.0188741
34.34		-0.00683424	0.0489109		0.056434	0.0441441	0.0323632		0.0150644	0.00173561	0.035345	-0.0158169	0.0265787	-0.00870865			0.000193575		0.0117055		0.0224657			-0.0231899		-0.0214444
34.36		-0.0176777	0.00570098		0.0620264	0.0267661	0.0379149		0.0183535	0.0173372	0.0219693	-0.0151212	-0.0649543	-0.0237558			0.0173456		0.0311199		0.0314976			-0.0245166		-0.00703953
34.38		-0.0203138	0.0210315		0.0572983	-0.0695873	-0.0214157		0.00885717	-0.00964845	0.0224488	-0.0812516	-0.0320881	-0.0300272			0.0101503		0.00411331		-0.00565809			-0.0470389		-0.0119282
34.4		0.0113723	0.00816213		0.0699087	-0.00812512	0.0496601		0.00968686	-0.0206852	0.0331296	-0.0085467	-0.00657871	0.00652139			-0.090868		-0.0299161		-0.0238746			0.0604472		0.0180081
34.42		-0.0649936	0.0385272		0.0492092	-0.0360448	0.0350602		0.0208306	-0.01959	0.0244163	0.0155125	0.0733573	-0.0249934			-0.0941911		0.0011495		0.0708032			0.0257621		-0.0212724
34.44		-0.00656398	0.0334016		0.0419337	-0.0565411	-0.00949055		0.0405454	-0.0123836	0.031684	-0.0234786	-0.0357154	-0.00337254			-0.0154647		0.00867973		0.0596075			-0.063273		-0.0110676
34.46		-0.054606	0.0276921		-0.0086871		-0.00902426		-0.0070459	-0.00315117	0.0279085	-0.00199111	0.0180973	0.0126023			0.0226226		-0.00638213		0.0426813			0.0150514		0.0418269
34.48		0.0266271	0.00703718		0.0769984	0.0904943	0.034239		0.0161066	0.0119503	0.021109	-0.0349171	-0.00401069	0.0057991			-0.0699431		0.0106781		0.0532076			-0.0112843		0.0123041
34.5		-0.0487859	0.0144726		0.102737	-0.0206298	-0.0136685		0.00850444	-0.0128202	0.0250252	-0.0136968	-0.0206065	0.00671386			-0.0797137		0.024523		0.0277756			-0.0179952		-0.026888
34.52		-0.0181637	0.0291216		0.0166987	-0.091822	-0.0400811		-0.000361103	0.026347	0.0291237	0.0661911	-0.0298005	-0.0140036			-0.071074		-0.000327104		0.0178816			0.0374797		0.0118455
34.54		-0.0398343	0.00993475		0.0549444	0.0219686	-0.00837773		0.0254906	0.00501828	0.0121015	-0.0179263	0.0154624	0.024073			-0.0898153		0.0335392		0.044874			0.00534518		-0.00866348
34.56		-0.0419979	0.0326676		0.11348	0.11629	0.0218092		0.0108901	0.012631	-0.0158806	0.0730919	0.0225662	-0.00476653			0.0346895		0.00121267		0.0161375			0.0253879		0.0565406
34.58		-0.0231533	0.0226916		0.0881173	-0.0323832	-0.0144108		0.0172219	-0.0192735	0.0236676	-0.0370882	-0.0220464	0.0297838			-0.0846271		-0.00718509		0.0508395			-0.0404782		0.0507174
34.6		0.00720254	0.0265492		0.117458	-0.00813106	-0.0295818		0.0202764	0.0182686	0.0471268	0.0408684	-0.0246847	0.00576393			-0.102614		0.0137295		-0.0118491			0.0302641		0.0115616
34.62		0.000217337	0.0269772		0.039705		0.00198883		0.00927022	-0.00511809	0.0336894	0.0115262	-0.0205534	0.00875009			0.0385351		-0.012558		-0.0311442			0.0138778		-0.013638
34.64		-0.0127097	0.00803132		0.089991		-0.00669835		0.0153071	0.0104757	0.0465293	0.0131167	-0.0222909	-0.0187263			-0.0473932		0.0247879		0.014261			0.00220808		-0.023999
34.66		-0.0727933	0.0414919		0.113828	0.101948	-0.0135185		-0.00265598	-0.018627	0.0225991	-0.0226073	-0.0106709	-0.0248725			0.0228652		0.00464332		0.00673661			0.029241		0.0356813
34.68		-0.0545648	0.0215853		-0.000757403	-0.0758468	0.0317767		-0.0061917	0.0211699	0.0239436	0.0275668	-0.00285788	0.0448422			0.00281439		0.0348558		0.0157294			0.0270086		-0.0172616
34.7		0.00801717	0.0294309		0.0934099	-0.0875644	0.00458573		0.0181869	-0.00822019	0.0130325	0.040225	0.0205143	0.0223156			0.0415473		-0.00631664		0.0598771			0.0106558		0.0405503
34.72		-0.02551	-0.0158796		0.0641667	0.0168974	0.00539866		0.019658	0.0248116	0.00033463	-0.0190019	-0.0366114	0.00930337			0.0165195		0.00560991		0.0323523			0.0271013		0.0249916
34.74		-0.00836577	0.0497334		0.0566523	0.0971346	-0.000111188		0.0167393	0.0110629	0.0170878	0.0341162	-0.0654272	-0.0111379			0.0220411		-0.0075351		0.019695			-0.0396504		0.00505881
34.76		0.0115953	0.0227347		0.0978561	0.00835367	-0.02261		-0.00238087	-0.0175486	0.023249	0.00777576	0.00349929	-0.0135165			-0.0722345		-0.0273616		-0.0362278			0.014491		-0.00858159
34.78		-0.0685486	0.0628519		-0.000498218	-0.045459	-0.0526429		-0.00514228	-0.0294739	0.0452984	-0.0473706	-0.0655279	0.0273827			-0.0117638		0.000630379		0.0218482			-0.000215679		0.0199137
34.8		-0.0193343	0.0367184		0.154118		-0.0310943		0.0115719	-0.0137505	0.0268676	0.0347589	-0.0579568	0.0142451			0.00457873		0.032797		0.0768613			-0.025932		-0.0195157
34.82		-0.0494724	0.0268666		0.139746	-0.106026	0.0333702		0.0242493	-0.0179274	0.0285476	0.00963737	0.0499342	0.0221365			-0.0104235		0.0185726		0.039329			0.0908962		-0.0326402
34.84		-0.00638179	0.0492785		0.137952	0.0050014	0.0117037		0.0091354	-0.0273882	0.0094446	-0.0184634	-0.0386852	0.0244552			0.0274506		0.0246921		0.0654965			0.0132327		0.0267403
34.86		0.0703763	0.0470157		0.0820261	0.0368773	-0.0643991		0.00833755	-0.0276824	0.0268808	0.00905401	0.0122686	0.002112			-0.0289318		0.0076199		0.0406164			0.0733142		-0.0595635
34.88		-0.0119511	0.0549568		0.253673	-0.0405304	-0.0162319		0.0251577	0.00388854	0.0243921	-0.00325825	-0.0565502	-0.0443196			-0.0379806		-0.000725916		-0.0109446			0.019657		0.053362
34.9		-0.0067395	0.0320357		0.0643352	-0.0336979	-0.0117956		0.0181316	-0.0139785	0.0271142	-0.0285915	0.0375404	-0.0157676			-0.00997383		0.0327773		0.0739194			-0.0830901		-0.0054883
34.92		-0.0512068	-0.0052779		0.0293579	-0.0274098	-0.0283022		-0.00657134	0.0266183	0.0527622	-0.0299303	0.0406867	-0.0148522			-0.0995689		-0.0130707		0.00536717			0.0172574		-0.0136335
34.94		-0.0129639	-0.00679942		0.0649522	-0.0192903	-0.0120315		0.00506894	0.0173697	0.0437612	-0.0219465	-0.0442052	0.0350749			-0.0122322		-0.0055139		0.0563463			0.0273787		-0.0356671
34.96		-0.0233765	0.0465762		0.0679571	-0.00222102	0.0171997		0.0419272	-0.013934	0.0331433	-0.00193626	0.0369762	-0.00850281			-0.0247871		-0.0125981		-0.0196382			-0.0205154		0.0184816
34.98		0.014798	0.0157274			-0.207876	0.0365409		-0.00426441	-0.0170898	0.0185106	0.0068446	0.0128907	0.0119476			0.00386646		-0.00455255		-0.0279066			-0.0415741		0.0209118
35		-0.0195899	0.0473033		0.0839838	-0.160955	-0.0207311		0.0188484	0.00410834	0.0239439	-0.0388274	0.0213251	0.00397608			-0.0545876		-0.0203899		-0.0298086			0.0317645		-0.0358951
35.02		-0.0608372	0.0483899		0.0456207	-0.0664738	0.0312451		0.0049789	-0.00724524	0.0476162	-0.0178912	-0.00807059	-0.0241161			-0.0547191		0.00470853		0.00679468			-0.0090796		-0.0159884
35.04		-0.00173801	0.0381539		0.0643988	0.128791	-0.0170066		0.0290419	0.0138694	0.0119662	-0.0161437	0.0397699	0.0303926			0.0162883		-0.00625724		0.0414549			0.0254325		0.0211353
35.06		0.027074	0.0144828		0.092957	0.0209238	0.0213332		-0.0220999	0.0258461	0.00998194	0.0118132	-0.0127743	-0.039426			-0.0553478		0.0195615		0.0065652			-0.0306169		0.0288599
35.08		-0.0153167	0.0218469		0.0336244	-0.0511413	-0.0205646		-0.0044544	-0.0120844	0.00830161	0.00870513	0.00428647	0.0285987			-0.0905931		0.0272054		0.0583634			0.0193984		0.0491866
35.1		0.00010552	-0.0129619		0.0118657	0.127063	0.00725952		0.00306092	0.0245612	0.026847	0.0484457	0.0476105	-0.0100333			0.0389378		-0.000297165		-0.00652534			0.012278		0.0136249
35.12		-0.00787775	0.02148		0.0464142	0.00585207	-0.0625839		0.0177659	-0.0128644	0.0134346	-0.033592	-0.0198327	0.00402047			0.0190929		-0.0165072		0.00251415			-0.0345291		0.00971297
35.14		-0.0147944	-0.00599972		0.0617152	0.00828863	-0.0511258		0.000595015	-0.00547947	0.0218065	-0.014154	0.0336722	0.0299939			0.0412969		0.00970912		-0.0130905			0.0203808		0.0479566
35.16		-0.0182432	0.0239885		0.0743288	-0.220002	0.0204748		-0.00405558	-0.0102865	0.00610348	-0.00582844	0.0290791	0.00611787			-0.105844		-0.010724		0.0415349			0.0241433		0.0246961
35.18		-0.019904	0.0123577		0.0485968		-0.0157446		0.014105	-0.00548148	0.0170815	0.0108486	0.0251477	0.00206187			0.000791543		-0.0294307		0.0742342			-0.00619907		-0.00421523
35.2		0.0589943	0.00880607		0.027149	0.0214752	-0.0255		0.0145442	0.0101161	0.0363807	-0.0235978	-0.0718198	0.000336693			-0.0281252		0.00444371		-0.0036877			0.0254635		-0.000765133
35.22		-0.0426985	0.0371883		0.0290102	0.00939274	-0.00485372		0.00502962	0.0127805	0.0156219	-0.056942	-0.0358598	-0.00844182			-0.0694152		0.0136156		-0.00354562			0.0355521		0.049121
35.24		0.00293455	0.0109914		0.0692085	-0.000923027	-0.010803		0.0275357	-0.0154732	0.0374932	-0.0252195	-0.0162311	0.03258			-0.0541401		0.00625137		-0.00343299			0.0205274		-0.0201188
35.26		-0.0124634	0.0199214		0.0689041	0.0284134	-0.030386		0.0178763	0.0259374	-0.017357	0.0270182	0.012764	-0.0346896			0.0212312		0.0152622		0.0536639			0.027868		0.0279755
35.28		-0.0439956	0.0194437		0.0510482	0.0259851	-0.00233752		0.0190626	-0.00085166	0.0295259	0.0301807	0.0232887	-0.0558914			0.0221478		0.0159721		0.0202579			0.0109423		-0.0076248
35.3		0.0141118	0.00632598		0.134292	0.0171719	-0.0609546		0.00957146	-0.0315982	0.0303024	0.0185316	-0.0670419	0.0125822			-0.0203446		0.0125119		0.0141559			0.0144178		-0.0696836
35.32		-0.0057486	0.0145787		0.038252	-0.0740586	-0.0478069		0.0389749	0.0093513	0.0166547	-0.0110967	0.0456439	0.0102767			-0.0366577		-0.0212664		0.0170542			0.0030778		-0.10323
35.34		0.0140957	0.0354338		0.0668172	-0.0837982	0.023325		0.0144115	0.00856265	0.00260002	-0.0355944	0.0479263	0.00907013			-0.0300194		0.0504551		-0.0472873			0.0250579		-0.0401094
35.36		-0.0423164	0.0316536		0.0894582	0.0154158	0.033693		0.0101877	0.00857726	0.00462336	-0.00037369	0.0118047	-0.00126176			0.0162329		0.0281296		0.00369933			-0.0255206		-0.0276463
35.38		-0.0105011	0.012044		0.057225	-0.0071026	-0.0228308		0.0186619	0.010063	-0.00279184	0.0453024	-0.0284242	-0.0220992			-0.0786123		-0.0149807		-0.00700636			0.0216989		-0.125312
35.4		0.00281657	0.000681762		0.117809	-0.0430085			0.0229035	-0.00928362	0.0286567	-0.0123229	-0.0216699	0.010865			-0.00947749		-0.0281405		0.0667889			0.0320031		-0.0253472
35.42		-0.0397623	-0.028474		0.105082	0.0115037			0.0160033	-0.0146718	0.0247284	0.010847	0.0287026	-0.0157692			-0.0181763		0.0410152		-0.00870941			-0.0534991		-0.00445434
35.44		-0.00588502	0.0140545		0.0903878	0.138882			0.0297419	-0.0117576	-0.00163661	0.0328944	0.0158316	0.00540012			-0.0577714		0.00335594		0.0651102			-0.00125112		0.0692991
35.46		-0.0291	0.0384066		0.128769	-0.00856005			0.0184297	-0.00628494	0.0258985	0.0534742	0.0365345	0.00731005			0.0288421		-0.00646215		0.0832942			-0.0488609		0.0106281
35.48		-0.00346037	0.0486189		0.0844199	0.0506149			0.0168347	-0.0156709	0.0234223	0.0395857	-0.00977974	0.0143541			-0.0443596		0.0205062		0.032147			0.000762524		-0.0277334
35.5		0.017917	0.0346271		0.102645	-0.00127223			-0.00162714	-0.00534491	0.0233722	-0.0147679	-0.0287061	0.0457891			0.0356751		0.0177626		-0.0326082			-0.000267634		0.0268273
35.52		-0.0167852	0.0711406		0.0816309	0.00411216			-0.00645375	-0.0272167	0.0324772	-0.00358767	-0.0264425	0.00205876			0.0604214		0.00963788		-0.0126725			0.0138982		-0.0492644
35.54		-0.0157016	0.0606962		0.0520181	-0.0881244			0.00605128	0.00381045	0.0166498	0.0599833	-0.0921051	0.0322663			0.0150829		0.00299064		0.013213			-0.00485554		0.0328867
35.56		-0.0321143	0.00688563		0.0563405	0.0112716			0.02583	-0.0396235	-0.0248537	-0.00631154	0.0453295	0.0284104			-0.04467		0.0296862		0.00749607			0.0104276		-0.0157169
35.58		-0.0289068	0.0160041		0.049312				0.0157513	0.00014293	0.0103031	-0.013253	0.0126405	0.0109717			0.0385099		0.0371412		0.0301567			0.052087		0.0360664
35.6		-0.0374772	0.0113695		-0.0119324				0.0185412	-0.00656235	0.0189366	0.0618422	0.0676559	-0.00147306			0.00295643		0.0297183		-0.0271572			-0.0429978		-0.0344661
35.62		-0.0713306	0.0117516		0.0845323	-0.0160737			0.0190628	-0.0437435	0.0359679	-0.078509	0.0171215	0.0226955			0.0128611		-0.000124788		0.0691939			0.0200828		-0.0251731
35.64		0.00562464	0.043295		0.0683291	0.00489921			0.0232695	0.0144189	-0.0144948	-0.0157106	0.0240683	-0.0288484			-0.0408467		0.00396579		0.0295062			-0.000360095		-0.0645422
35.66		-0.0477908	0.0348028		0.0047726	0.0262263			0.0265442	-0.0106982	0.0370232	-0.00670397	-0.0211769	0.0101742			-0.0265289		0.00723658		-0.0114426			-0.0252433		0.102337
35.68		-0.0601393	0.0438335		0.0420198	-0.0254834			0.0231306	-0.0202701	0.0283391	0.0373123	0.00356378	0.0225492			-0.0140909		0.0147335		0.0227652			-0.00259789		0.0090084
35.7		-0.0466062	0.00983522		0.0319781	-0.00635264			0.0208686	0.00198301	0.0195748	0.0562525	-0.0192641	0.0276111			-0.0280518		-0.0379253		0.0306845			-0.0150436		0.0130684
35.72		0.0333252	0.0205444		0.133053	-0.0401864			0.0285107	-0.0169859	0.00362316	-0.00515766	0.0258608	-0.0193875			-0.0304329		-0.00331773		0.0655603			0.0266156		0.0153718
35.74		-0.0603342	0.0216878		0.00842392	-0.000108244			0.00387292	0.0222705	0.018734	-0.00388061	0.028051	-0.0219017			0.00619141		-0.0390336		0.0675661			-0.0400035		0.000412489
35.76		0.00255993	-0.0182198		0.0403846	-0.170485			0.0393347	0.0107994	0.0292384	0.017613	-0.00540116	-0.00174352			-0.0220951		-0.0554785		0.0368111			0.0115898		0.0349915
35.78		-0.060747	-0.00417068		0.0259319	-0.0637309			0.0125495	0.0338888	0.00958826	0.00670304	0.0150286	-0.0161199			-0.0173105		0.0307905		0.0613496			0.00631484		0.00993039
35.8		0.0236133	0.0100773		0.0188661	-0.0165514			0.00866016	0.0092089	0.0105349	0.0571008	-0.00863023	-0.0242778			-0.00647563		0.0377042		0.0391929			-0.0283604		-0.012059
35.82		-0.0391805	-0.00381912		0.00612496	0.0585196			0.0267219	-0.0195299	0.0110472	0.0423516	0.0180898	-0.00106741			-0.00493826		0.00381517		-0.000403402			0.0345733		-0.057532
35.84		-0.00297378	0.0649744		0.0480598	0.0530683			0.0336224	-0.0128204	0.00284819	-0.00850298	-0.0296868	-0.0460232			-0.0865908		-0.0144031		-0.0375885			-0.0304033		0.011912
35.86		0.0421124	0.0058412		0.0507732	-0.0396221			0.0202566	0.0133038	0.00599454	-0.0251955	0.0374399	-0.0445188			-0.0627783		0.0138752		0.0234067			-0.0370261		0.0419122
35.88		-0.0225508	0.00978199		0.0355755	-0.0187369			0.0218978	-0.0104522	0.0194205	-0.0217685	0.00213413	-0.00648204			-0.0129956		0.0329206		0.0592532			0.0622141		0.0231142
35.9		-0.0417331	0.0491963		0.0533876	-0.0405849			0.0400582	0.00302808	0.00153322	0.0333941	0.00890714	0.00520047			-0.0628236		0.0277439		0.0129872			0.0117596		-0.0466998
35.92		-0.0428044	0.0478958		0.0734837	-0.0190917			0.047594	0.00345343	-0.0124869	0.00125239	-0.0059121	-0.0393064			-0.0315338		-0.0150212		0.0206599			-0.0461643		-0.0308127
35.94		-0.00390028	0.0247367		0.0566068	0.0653076			0.0313574	-0.0207147	0.0417123	-0.0209334	0.0534942	-0.00441179			-0.0641504		0.00216844		0.0902762			0.0469556		0.0244925
35.96		-0.0497822	-0.0199658		0.0907441	-0.0150015			0.0135648	0.00542856	-0.00551152	0.0205828	-0.0263687	0.0619429			-0.0269152		-0.00301377		-0.00333284			0.000121928		-0.0190243
35.98		-0.0632117	0.0209874		0.0484352	-0.0609559			0.0181612	-0.0114508	-0.00258548	-0.0126397	0.00384621	0.0192042			-0.0204753		0.0166341		0.0530598			0.0245982		0.0382256
36		-0.0126969	0.0723108		-0.00838082	0.0912979			0.0348575	-0.0193095	0.0361876	-0.0277485	0.0120723	0.0231847			0.0131814		0.0122583		0.120905			-0.00692332		0.021154
36.02		-0.0433861	-0.00652673		0.0565578	0.00770706			0.0228469	0.0115633	-0.00452856	0.0123472	0.0150899	0.0146254			-0.0318999		0.0254047		0.0445261			0.033961		-0.00552561
36.04		0.0237388	0.013901		0.133587	0.0502611			0.0181781	-0.0281097	-0.00906868	0.0393572	-0.0334115	-0.0391948			-0.0638816		0.0380018		0.0570778			0.00116794		-0.0295749
36.06		0.0402533	-0.0243781		0.0287986	0.0066507			0.025531	-0.0156556	0.0187323	-0.0230908	0.0348707	0.0258737			0.0110023		-0.00393863		0.0224455			0.0303733		0.0163575
36.08		-0.0678383	0.0113883		0.0114686	-0.0047005			0.0196636	-0.033148	0.0184624	-0.0274712	-0.0382806	0.0112573			-0.016618		0.0127254		0.0235918			-0.0181498		0.00521872
36.1		-0.0405164	-0.0363316		0.0797013	-0.0959098			0.0228999	-0.00449811	0.0272269	-0.00603533	0.00628358	0.0137774			-0.0218889		-0.0036312		0.0520549			0.00805912		-0.0825456
36.12		0.00335791	0.027268			-0.0124962			0.0147553	-0.0158912	0.0140382	-0.0692738	0.017322	0.0137611			-0.0303576		-0.00439832		0.042569			0.0562789		0.00354017
36.14		0.0166277	0.0312512		0.0614242	-0.116674			0.0331708	-0.0142781	0.0223773	0.0205377	-0.0143915	0.0196018			-0.0201527		-0.00367733		0.0209003			-0.0300574		0.00969115
36.16		-0.0275961	0.0302529		0.09475	-0.0732005			0.0312103	-0.00817843	0.0149011	0.022763	-0.0382278	0.0128469			-0.0998655		-0.010392		0.0167435			0.014122		0.0258561
36.18		-0.0263943	0.0169162		0.0893071	-0.00530158			0.0270283	0.000142989	0.00879712	0.010994	-0.0352456	-0.0108588			-0.0201178		0.00308208		0.00277043			-0.00286302		0.0111793
36.2		-0.0206297	0.00265969		-0.018837	-0.0448015			0.0118696	-0.00857989	0.0238833	0.0391441	0.0455862	0.0104594			-0.012064		-0.0103961		-0.0106448			0.0451364		-0.0465998
36.22		-0.0621146	0.0268832		0.0618988	-0.0353285			0.0273285	-0.0121638	0.0315192	-0.0326483	-0.0284175	0.00571968			0.0252954		-0.00120457		0.0502367			0.0447913		0.0265201
36.24		-0.0454464	-0.0108284		0.0776365	0.0399421			-0.00199265	-0.00983008	0.0166542	-0.0448887	0.0100911	0.0196398			-0.0360625		-0.00385112		0.0294214			-0.0104173		-0.0104567
36.26		-0.0453072	0.016012		0.00750851	-0.0146599			0.0369467	0.00704243	0.0248165	0.00458641	0.055696	-0.0111851			0.0206124		0.00320498		0.00207192			-0.0235904		-9.09207e-05
36.28		-0.00688181	0.0117187		0.0147536	-0.0669608			0.0439656	0.0169215	-0.021729	-0.0445216	0.0275644	-0.00245398			-0.0380127		-0.0180162		0.0742039			0.0390782		-0.0282625
36.3		-0.0266577	0.025527		0.110587	-0.0508552			0.0190684	-0.016518	0.0124822	0.0260224	0.0183575	-0.0172262			-0.071822		0.0199946		0.0464293			-0.0208473		-0.0349856
36.32		-0.0306251	0.0390569		0.0779985	-0.00863718			-0.000788146	-0.0105781	-0.0126772	0.0415485	0.0360824	0.00942692			0.00792713		0.0286021		0.0136293			0.0379171		0.0247742
36.34		-0.0275711	0.0339243		0.0884616	-0.00647995			0.0213513	-0.007975	0.0326213	0.0280969	0.0259697	0.0119059			0.0458653		0.0209122		0.0218055			0.0351686		0.00518856
36.36		-0.0199549	0.0082106		0.0423705	-0.0692915			0.0287827	-0.013317	-0.00975368	-0.0188611	-0.00158111	-0.0203166			-0.0446308		-0.0171581		0.0754706			-0.00429347		-0.00828737
36.38		-0.0540531	0.0313311		0.0707306	0.0241987			0.0196358	0.00358455	0.0140844	0.0194855	0.0214362	-0.0349469			-0.0442091		0.00774836		0.0345285			-0.00450636		0.00555189
36.4		-0.0355351	0.0393733		0.0464616	-0.029574			0.011186	-0.0278692	0.0358394	-0.0383305	0.0650951	-0.011035			-0.085548		0.0367423		0.0255684			-0.000656339		0.00803955
36.42		-0.0336789	0.0052139		0.0628055	-0.0097354			0.00053571	-0.0202862	-0.0118233	-0.0341609	-0.00799106	-0.0147298			-0.00157		0.00937549		0.0100541			0.0706532		-0.00388255
36.44		-0.0283183	0.0151032		0.0706051	-0.0250826			0.0252228	-0.0123556	0.018484	-0.0378543	-0.00426354	0.0199235			-0.0436991		-0.0175985		0.00811538			0.0267803		-0.0559079
36.46		-0.0376803	0.0418924		0.0233105	-0.0218458			-0.00402302	-0.00453864	0.00513042	-0.0416613	0.0381798	0.027759			-0.0115337		0.00272536		0.0202283			-0.0197449		-0.0177049
36.48		0.019273	0.0394405		0.033821				0.00208894	0.0045875	0.0347916	-0.0204112	-0.0186808	0.000499264			0.00259039		0.00126382		-0.0180837			0.0012434		-0.0271927
36.5		-0.0455922	0.0086102		0.0996725	0.0953775			0.0074846	-0.0282928	0.0099516	-0.000112966	0.00195759	0.0150315			-0.00366142		-0.00577452		-0.0146333			0.0165164		0.0534826
36.52		-0.0600225	0.0044857		0.0541462	-0.0467206			0.00136232	-0.00945874	0.0253241	-0.0489257	-0.0315709	0.0103968			0.0146113		-0.00602362		0.027748			-0.00325927		-0.0287377
36.54		-0.0127788	0.00639982		0.0804009	-0.025061			0.027792	0.0031137	0.0283141	0.0257465	-0.00751219	0.0143925			-0.0690369		-0.00718852		0.0150614			0.0139275		0.0125756
36.56		-0.0186189	0.00162248		0.0818008	-0.0372615			0.0291321	-0.0193523	0.0516052	-0.00174402	-0.00603048	0.010973			-0.0461987		0.00162847		0.0193215			0.0165556		0.0102271
36.58		0.0484499	0.00683494		0.092802	-0.0189055			0.024134	0.00168584	0.0127226	0.0349025	0.0261524	0.0260444			-0.0623651		0.00577194		0.0466586			0.0431865		0.0184189
36.6		-0.0531487	-0.00163999		0.0361429				0.0142931	-0.0277204	0.0163328	0.0334993	0.0478157	0.0199865			0.0283946		-0.00871393		0.00270565			0.0235831		0.0264233
36.62		-0.0368962	0.0121725		0.0552917	0.168821			0.0114403	-0.0203041	0.0187764	-0.00979726	-0.0230211	0.0267361			-0.054008		0.00186337		0.0235726			-0.0605138		0.0113568
36.64		0.0262011	0.041305		0.059874				0.0229551	-0.0125474	-0.0100253	-0.0229561	0.0368731	-0.0186075			0.0321456		-0.0116699		0.0413936			0.0339883		-0.0222069
36.66		-0.014188	0.0124195		0.056863				0.0246645	-0.00562414	0.0228368	-0.0237486	0.0412947	-0.0115438			-0.00604844		0.0228521		0.026056			0.0140165		0.000912824
36.68		-0.0415098	0.0688761		0.0776988	-0.0424607			0.0218759	0.0242248	0.0159302	-0.0406588	0.0174223	-0.0277796			0.000421257		-0.0137868		0.0718237			0.048125		-0.0665086
36.7		-0.116514	0.00622854		0.00462169	0.00422014			0.0320953	-0.0428763	-0.0176464	-0.0558698	-0.00953367	0.0312137			-0.034935		0.0122317		0.042192			0.0154875		0.015433
36.72		-0.00382644	0.00954619		0.0578187	0.0354121			0.0206406	-0.00930053	-0.00551461	-0.0248891	0.0513152	0.0193025			0.0294648		0.0138076		-0.0326507			-0.0570913		-0.00971159
36.74		-0.0053724	0.0584573		0.0311594	0.0943217			0.00570604	0.0168465	0.0249925	-0.0174991	0.00200234	0.0180151			-0.0190227		-0.0328215		0.00640463			-0.0096239		0.0157993
36.76		-0.0211131	0.008032		0.0449381	-0.00615037			0.0104264	0.000397623	0.0128592	0.0262034	0.0138511	0.0233736			-0.0190295		-0.0143642		0.0467143			-0.0410407		0.0407603
36.78		0.0232341	-0.00223848		0.00170053	-0.0306617			0.0154605	-0.00413768	0.0143989	-0.025345	0.014032	0.0107068			-0.00275176		-0.00361977		0.0419986			-0.0188779		-0.00315961
36.8		0.0353429	0.0334828		0.0181326	0.117997			0.00387082	0.0141782	0.0046417	-0.0458374	-0.0792411	0.000875481			-0.107494		0.0306401		0.00697141			0.0109228		-0.0173375
36.82		0.00426139	0.0141824		0.119448	-0.011944			0.0190701	0.00504819	0.0104932	0.00504176	0.0177568	0.0114393			-0.0506658		0.00455802		0.0243186			-0.0161536		-0.0256752
36.84		-0.00989428	-0.0303435		0.0285387	-0.0349921			0.0213384	0.01132	-0.0141303	0.0036722	-0.0121382	0.0297403			-0.0486604		-0.00871969		0.0461621			-0.04591		-0.0329888
36.86		-0.0674505	0.0164941		0.000245209	-0.00774016			0.015133	0.00625161	0.0226389	0.0451906	-0.0205786	0.0179648			-0.000879823		0.000133983		-0.0448787			-0.00196535		0.0248398
36.88		-0.0347125	0.00147426		0.0888507	0.0374728			0.0179521	-0.0180827	0.0169459	-0.0494617	-0.00572715	-0.00954316			-0.00520495		-0.00637545		-0.0371924			0.0203008		0.00166953
36.9		-0.0148205	0.00857981		0.0284403	-0.0464369			0.004161	0.0407694	0.00175386	0.00211734	0.0137648	0.0200725			0.0134775		0.0281418		0.0698822			0.0248326		-0.0139046
36.92		-0.00115995	-0.00944007		0.0196422	-0.0185554			0.0039165	-0.00310739	-0.0109316	0.0224189	-0.00692617	0.0080142			-0.089307		-0.0155312		-0.0100395			0.0321489		0.0151977
36.94		0.00380887	0.0126485		0.0360389	0.00417197			-0.006093	-0.00411102	0.01352	0.060021	0.0110154	-0.0111706			-0.0766189		-0.00222222		-0.00874365			0.0370793		-0.0331324
36.96		0.00532746	0.0500151		0.0173541	-0.0545776			-0.00210847	-0.00998087	0.0188529	-0.0470796	0.0498656	0.000530949			0.0206073		-0.0137364		0.0340562			-0.00453425		-0.0179451
36.98		-0.0418248	-0.00798603		0.0907972	-0.0501524			0.017351	-0.01262	0.0221491	-0.0445806	0.015825	0.0192151			-0.00442456		-0.0170667		0.0180576			-0.0187716		0.0243104
[truncated: 652 more rows]

## Sheet: SKs
time	Normalized strain
[truncated: 2,503 more rows]
[truncated: 3 more columns]

## Sheet: MDAs
time	Normalized strain
[truncated: 2,503 more rows]
